# Supplementary material for: A machine learning framework to identify complex physicochemical features of B cell epitopes
Source: Research Square preprint supplement (doi:10.21203/rs.3.rs-6255613/v1), 2025-04-18
Supplement: Supplementary file 3 [file 46c60792515bf8bd175f08af.xlsx]

## Sheet: Peptide Map
Peptide Map Linear Epitope Mapping (PEP20215042037) - Mouse IgG 3D10
Microarray Content:	Erythrocyte membrane protein 1 (GenBank: AAQ73926.1), hypothetical protein PFNF54_03544 (GenBank: EWC87419.1), PvDBP and PvEBP2 elongated with neutral GSGSGSG linkers at the C- and N-terminus and converted into overlapping peptides
Sample:	Mouse IgG 3D10
Peptide Length:	20 aa
Peptide Overlap:	19 aa and 18 aa for var2csa (nf54) or hypothetical protein PFNF54_03544
Number of Peptides:	4593
Number of Spots:	9,186 (peptides printed in duplicate)
HA Controls:	YPYDVPDYAG	212 spots
Mouse IgG 3D10, 10 µg/ml		1	2	3	4	5	6	7	8	9	10	11	12	13	14	15	16	17	18	19	20	21	22	23	24	25	26	27	28	29	30	31	32	33	34	35	36	37	38	39	40	41	42	43	44	45	46	47	48
	YPYDVPDYAG	G	YPYDVPDYAG	G	YPYDVPDYAG	G	YPYDVPDYAG	G	YPYDVPDYAG	G	YPYDVPDYAG	G	YPYDVPDYAG	G	YPYDVPDYAG	G	YPYDVPDYAG	G	YPYDVPDYAG	G	YPYDVPDYAG	G	YPYDVPDYAG	G	YPYDVPDYAG	G	YPYDVPDYAG	G	YPYDVPDYAG	G	YPYDVPDYAG	G	YPYDVPDYAG	G	YPYDVPDYAG	G	YPYDVPDYAG	G	YPYDVPDYAG	G	YPYDVPDYAG	G	YPYDVPDYAG	G	YPYDVPDYAG	G	YPYDVPDYAG	G	YPYDVPDYAG
1	YPYDVPDYAG	GSGSGSGMDSTSTIANKIEE	SGSGSGMDSTSTIANKIEEY	GSGSGMDSTSTIANKIEEYL	SGSGMDSTSTIANKIEEYLG	GSGMDSTSTIANKIEEYLGA	SGMDSTSTIANKIEEYLGAK	GMDSTSTIANKIEEYLGAKS	MDSTSTIANKIEEYLGAKSD	DSTSTIANKIEEYLGAKSDD	STSTIANKIEEYLGAKSDDS	TSTIANKIEEYLGAKSDDSK	STIANKIEEYLGAKSDDSKI	TIANKIEEYLGAKSDDSKID	IANKIEEYLGAKSDDSKIDE	ANKIEEYLGAKSDDSKIDEL	NKIEEYLGAKSDDSKIDELL	KIEEYLGAKSDDSKIDELLK	IEEYLGAKSDDSKIDELLKA	EEYLGAKSDDSKIDELLKAD	EYLGAKSDDSKIDELLKADP	YLGAKSDDSKIDELLKADPS	LGAKSDDSKIDELLKADPSE	GAKSDDSKIDELLKADPSEV	AKSDDSKIDELLKADPSEVE	KSDDSKIDELLKADPSEVEY	SDDSKIDELLKADPSEVEYY	DDSKIDELLKADPSEVEYYR	DSKIDELLKADPSEVEYYRS	SKIDELLKADPSEVEYYRSG	KIDELLKADPSEVEYYRSGG	IDELLKADPSEVEYYRSGGD	DELLKADPSEVEYYRSGGDG	ELLKADPSEVEYYRSGGDGD	LLKADPSEVEYYRSGGDGDY	LKADPSEVEYYRSGGDGDYL	KADPSEVEYYRSGGDGDYLK	ADPSEVEYYRSGGDGDYLKN	DPSEVEYYRSGGDGDYLKNN	PSEVEYYRSGGDGDYLKNNI	SEVEYYRSGGDGDYLKNNIC	EVEYYRSGGDGDYLKNNICK	VEYYRSGGDGDYLKNNICKI	EYYRSGGDGDYLKNNICKIT	YYRSGGDGDYLKNNICKITV	YRSGGDGDYLKNNICKITVN	RSGGDGDYLKNNICKITVNH	SGGDGDYLKNNICKITVNHS	GGDGDYLKNNICKITVNHSD
2	G	GSGSGSGMDSTSTIANKIEE	SGSGSGMDSTSTIANKIEEY	GSGSGMDSTSTIANKIEEYL	SGSGMDSTSTIANKIEEYLG	GSGMDSTSTIANKIEEYLGA	SGMDSTSTIANKIEEYLGAK	GMDSTSTIANKIEEYLGAKS	MDSTSTIANKIEEYLGAKSD	DSTSTIANKIEEYLGAKSDD	STSTIANKIEEYLGAKSDDS	TSTIANKIEEYLGAKSDDSK	STIANKIEEYLGAKSDDSKI	TIANKIEEYLGAKSDDSKID	IANKIEEYLGAKSDDSKIDE	ANKIEEYLGAKSDDSKIDEL	NKIEEYLGAKSDDSKIDELL	KIEEYLGAKSDDSKIDELLK	IEEYLGAKSDDSKIDELLKA	EEYLGAKSDDSKIDELLKAD	EYLGAKSDDSKIDELLKADP	YLGAKSDDSKIDELLKADPS	LGAKSDDSKIDELLKADPSE	GAKSDDSKIDELLKADPSEV	AKSDDSKIDELLKADPSEVE	KSDDSKIDELLKADPSEVEY	SDDSKIDELLKADPSEVEYY	DDSKIDELLKADPSEVEYYR	DSKIDELLKADPSEVEYYRS	SKIDELLKADPSEVEYYRSG	KIDELLKADPSEVEYYRSGG	IDELLKADPSEVEYYRSGGD	DELLKADPSEVEYYRSGGDG	ELLKADPSEVEYYRSGGDGD	LLKADPSEVEYYRSGGDGDY	LKADPSEVEYYRSGGDGDYL	KADPSEVEYYRSGGDGDYLK	ADPSEVEYYRSGGDGDYLKN	DPSEVEYYRSGGDGDYLKNN	PSEVEYYRSGGDGDYLKNNI	SEVEYYRSGGDGDYLKNNIC	EVEYYRSGGDGDYLKNNICK	VEYYRSGGDGDYLKNNICKI	EYYRSGGDGDYLKNNICKIT	YYRSGGDGDYLKNNICKITV	YRSGGDGDYLKNNICKITVN	RSGGDGDYLKNNICKITVNH	SGGDGDYLKNNICKITVNHS	GGDGDYLKNNICKITVNHSD
3	YPYDVPDYAG	DSGKYDPCEKKLPPYDDNDQ	SGKYDPCEKKLPPYDDNDQW	GKYDPCEKKLPPYDDNDQWK	KYDPCEKKLPPYDDNDQWKC	YDPCEKKLPPYDDNDQWKCQ	DPCEKKLPPYDDNDQWKCQQ	PCEKKLPPYDDNDQWKCQQN	CEKKLPPYDDNDQWKCQQNS	EKKLPPYDDNDQWKCQQNSS	KKLPPYDDNDQWKCQQNSSD	KLPPYDDNDQWKCQQNSSDG	LPPYDDNDQWKCQQNSSDGS	PPYDDNDQWKCQQNSSDGSG	PYDDNDQWKCQQNSSDGSGK	YDDNDQWKCQQNSSDGSGKP	DDNDQWKCQQNSSDGSGKPE	DNDQWKCQQNSSDGSGKPEN	NDQWKCQQNSSDGSGKPENI	DQWKCQQNSSDGSGKPENIC	QWKCQQNSSDGSGKPENICV	WKCQQNSSDGSGKPENICVP	KCQQNSSDGSGKPENICVPP	CQQNSSDGSGKPENICVPPR	QQNSSDGSGKPENICVPPRR	QNSSDGSGKPENICVPPRRE	NSSDGSGKPENICVPPRRER	SSDGSGKPENICVPPRRERL	SDGSGKPENICVPPRRERLC	DGSGKPENICVPPRRERLCT	GSGKPENICVPPRRERLCTY	SGKPENICVPPRRERLCTYN	GKPENICVPPRRERLCTYNL	KPENICVPPRRERLCTYNLE	PENICVPPRRERLCTYNLEN	ENICVPPRRERLCTYNLENL	NICVPPRRERLCTYNLENLK	ICVPPRRERLCTYNLENLKF	CVPPRRERLCTYNLENLKFD	VPPRRERLCTYNLENLKFDK	PPRRERLCTYNLENLKFDKI	PRRERLCTYNLENLKFDKIR	RRERLCTYNLENLKFDKIRD	RERLCTYNLENLKFDKIRDN	ERLCTYNLENLKFDKIRDNN	RLCTYNLENLKFDKIRDNNA	LCTYNLENLKFDKIRDNNAF	CTYNLENLKFDKIRDNNAFL	TYNLENLKFDKIRDNNAFLA
4	G	DSGKYDPCEKKLPPYDDNDQ	SGKYDPCEKKLPPYDDNDQW	GKYDPCEKKLPPYDDNDQWK	KYDPCEKKLPPYDDNDQWKC	YDPCEKKLPPYDDNDQWKCQ	DPCEKKLPPYDDNDQWKCQQ	PCEKKLPPYDDNDQWKCQQN	CEKKLPPYDDNDQWKCQQNS	EKKLPPYDDNDQWKCQQNSS	KKLPPYDDNDQWKCQQNSSD	KLPPYDDNDQWKCQQNSSDG	LPPYDDNDQWKCQQNSSDGS	PPYDDNDQWKCQQNSSDGSG	PYDDNDQWKCQQNSSDGSGK	YDDNDQWKCQQNSSDGSGKP	DDNDQWKCQQNSSDGSGKPE	DNDQWKCQQNSSDGSGKPEN	NDQWKCQQNSSDGSGKPENI	DQWKCQQNSSDGSGKPENIC	QWKCQQNSSDGSGKPENICV	WKCQQNSSDGSGKPENICVP	KCQQNSSDGSGKPENICVPP	CQQNSSDGSGKPENICVPPR	QQNSSDGSGKPENICVPPRR	QNSSDGSGKPENICVPPRRE	NSSDGSGKPENICVPPRRER	SSDGSGKPENICVPPRRERL	SDGSGKPENICVPPRRERLC	DGSGKPENICVPPRRERLCT	GSGKPENICVPPRRERLCTY	SGKPENICVPPRRERLCTYN	GKPENICVPPRRERLCTYNL	KPENICVPPRRERLCTYNLE	PENICVPPRRERLCTYNLEN	ENICVPPRRERLCTYNLENL	NICVPPRRERLCTYNLENLK	ICVPPRRERLCTYNLENLKF	CVPPRRERLCTYNLENLKFD	VPPRRERLCTYNLENLKFDK	PPRRERLCTYNLENLKFDKI	PRRERLCTYNLENLKFDKIR	RRERLCTYNLENLKFDKIRD	RERLCTYNLENLKFDKIRDN	ERLCTYNLENLKFDKIRDNN	RLCTYNLENLKFDKIRDNNA	LCTYNLENLKFDKIRDNNAF	CTYNLENLKFDKIRDNNAFL	TYNLENLKFDKIRDNNAFLA
5	YPYDVPDYAG	ADVLLTARNEGEKIVQNHPD	DVLLTARNEGEKIVQNHPDT	VLLTARNEGEKIVQNHPDTN	LLTARNEGEKIVQNHPDTNS	LTARNEGEKIVQNHPDTNSS	TARNEGEKIVQNHPDTNSSN	ARNEGEKIVQNHPDTNSSNV	RNEGEKIVQNHPDTNSSNVC	NEGEKIVQNHPDTNSSNVCN	EGEKIVQNHPDTNSSNVCNA	GEKIVQNHPDTNSSNVCNAL	EKIVQNHPDTNSSNVCNALE	KIVQNHPDTNSSNVCNALER	IVQNHPDTNSSNVCNALERS	VQNHPDTNSSNVCNALERSF	QNHPDTNSSNVCNALERSFA	NHPDTNSSNVCNALERSFAD	HPDTNSSNVCNALERSFADL	PDTNSSNVCNALERSFADLA	DTNSSNVCNALERSFADLAD	TNSSNVCNALERSFADLADI	NSSNVCNALERSFADLADII	SSNVCNALERSFADLADIIR	SNVCNALERSFADLADIIRG	NVCNALERSFADLADIIRGT	VCNALERSFADLADIIRGTD	CNALERSFADLADIIRGTDQ	NALERSFADLADIIRGTDQW	ALERSFADLADIIRGTDQWK	LERSFADLADIIRGTDQWKG	ERSFADLADIIRGTDQWKGT	RSFADLADIIRGTDQWKGTN	SFADLADIIRGTDQWKGTNS	FADLADIIRGTDQWKGTNSN	ADLADIIRGTDQWKGTNSNL	DLADIIRGTDQWKGTNSNLE	LADIIRGTDQWKGTNSNLEK	ADIIRGTDQWKGTNSNLEKN	DIIRGTDQWKGTNSNLEKNL	IIRGTDQWKGTNSNLEKNLK	IRGTDQWKGTNSNLEKNLKQ	RGTDQWKGTNSNLEKNLKQM	GTDQWKGTNSNLEKNLKQMF	TDQWKGTNSNLEKNLKQMFA	DQWKGTNSNLEKNLKQMFAK	QWKGTNSNLEKNLKQMFAKI	WKGTNSNLEKNLKQMFAKIR	KGTNSNLEKNLKQMFAKIRE
6	G	ADVLLTARNEGEKIVQNHPD	DVLLTARNEGEKIVQNHPDT	VLLTARNEGEKIVQNHPDTN	LLTARNEGEKIVQNHPDTNS	LTARNEGEKIVQNHPDTNSS	TARNEGEKIVQNHPDTNSSN	ARNEGEKIVQNHPDTNSSNV	RNEGEKIVQNHPDTNSSNVC	NEGEKIVQNHPDTNSSNVCN	EGEKIVQNHPDTNSSNVCNA	GEKIVQNHPDTNSSNVCNAL	EKIVQNHPDTNSSNVCNALE	KIVQNHPDTNSSNVCNALER	IVQNHPDTNSSNVCNALERS	VQNHPDTNSSNVCNALERSF	QNHPDTNSSNVCNALERSFA	NHPDTNSSNVCNALERSFAD	HPDTNSSNVCNALERSFADL	PDTNSSNVCNALERSFADLA	DTNSSNVCNALERSFADLAD	TNSSNVCNALERSFADLADI	NSSNVCNALERSFADLADII	SSNVCNALERSFADLADIIR	SNVCNALERSFADLADIIRG	NVCNALERSFADLADIIRGT	VCNALERSFADLADIIRGTD	CNALERSFADLADIIRGTDQ	NALERSFADLADIIRGTDQW	ALERSFADLADIIRGTDQWK	LERSFADLADIIRGTDQWKG	ERSFADLADIIRGTDQWKGT	RSFADLADIIRGTDQWKGTN	SFADLADIIRGTDQWKGTNS	FADLADIIRGTDQWKGTNSN	ADLADIIRGTDQWKGTNSNL	DLADIIRGTDQWKGTNSNLE	LADIIRGTDQWKGTNSNLEK	ADIIRGTDQWKGTNSNLEKN	DIIRGTDQWKGTNSNLEKNL	IIRGTDQWKGTNSNLEKNLK	IRGTDQWKGTNSNLEKNLKQ	RGTDQWKGTNSNLEKNLKQM	GTDQWKGTNSNLEKNLKQMF	TDQWKGTNSNLEKNLKQMFA	DQWKGTNSNLEKNLKQMFAK	QWKGTNSNLEKNLKQMFAKI	WKGTNSNLEKNLKQMFAKIR	KGTNSNLEKNLKQMFAKIRE
7	YPYDVPDYAG	ENDKVLQDKYPKDQKYTKLR	NDKVLQDKYPKDQKYTKLRE	DKVLQDKYPKDQKYTKLREA	KVLQDKYPKDQKYTKLREAW	VLQDKYPKDQKYTKLREAWW	LQDKYPKDQKYTKLREAWWN	QDKYPKDQKYTKLREAWWNA	DKYPKDQKYTKLREAWWNAN	KYPKDQKYTKLREAWWNANR	YPKDQKYTKLREAWWNANRQ	PKDQKYTKLREAWWNANRQK	KDQKYTKLREAWWNANRQKV	DQKYTKLREAWWNANRQKVW	QKYTKLREAWWNANRQKVWE	KYTKLREAWWNANRQKVWEV	YTKLREAWWNANRQKVWEVI	TKLREAWWNANRQKVWEVIT	KLREAWWNANRQKVWEVITC	LREAWWNANRQKVWEVITCG	REAWWNANRQKVWEVITCGA	EAWWNANRQKVWEVITCGAR	AWWNANRQKVWEVITCGARS	WWNANRQKVWEVITCGARSN	WNANRQKVWEVITCGARSND	NANRQKVWEVITCGARSNDL	ANRQKVWEVITCGARSNDLL	NRQKVWEVITCGARSNDLLI	RQKVWEVITCGARSNDLLIK	QKVWEVITCGARSNDLLIKR	KVWEVITCGARSNDLLIKRG	VWEVITCGARSNDLLIKRGW	WEVITCGARSNDLLIKRGWR	EVITCGARSNDLLIKRGWRT	VITCGARSNDLLIKRGWRTS	ITCGARSNDLLIKRGWRTSG	TCGARSNDLLIKRGWRTSGK	CGARSNDLLIKRGWRTSGKS	GARSNDLLIKRGWRTSGKSD	ARSNDLLIKRGWRTSGKSDR	RSNDLLIKRGWRTSGKSDRK	SNDLLIKRGWRTSGKSDRKK	NDLLIKRGWRTSGKSDRKKN	DLLIKRGWRTSGKSDRKKNF	LLIKRGWRTSGKSDRKKNFE	LIKRGWRTSGKSDRKKNFEL	IKRGWRTSGKSDRKKNFELC	KRGWRTSGKSDRKKNFELCR	RGWRTSGKSDRKKNFELCRK
8	G	ENDKVLQDKYPKDQKYTKLR	NDKVLQDKYPKDQKYTKLRE	DKVLQDKYPKDQKYTKLREA	KVLQDKYPKDQKYTKLREAW	VLQDKYPKDQKYTKLREAWW	LQDKYPKDQKYTKLREAWWN	QDKYPKDQKYTKLREAWWNA	DKYPKDQKYTKLREAWWNAN	KYPKDQKYTKLREAWWNANR	YPKDQKYTKLREAWWNANRQ	PKDQKYTKLREAWWNANRQK	KDQKYTKLREAWWNANRQKV	DQKYTKLREAWWNANRQKVW	QKYTKLREAWWNANRQKVWE	KYTKLREAWWNANRQKVWEV	YTKLREAWWNANRQKVWEVI	TKLREAWWNANRQKVWEVIT	KLREAWWNANRQKVWEVITC	LREAWWNANRQKVWEVITCG	REAWWNANRQKVWEVITCGA	EAWWNANRQKVWEVITCGAR	AWWNANRQKVWEVITCGARS	WWNANRQKVWEVITCGARSN	WNANRQKVWEVITCGARSND	NANRQKVWEVITCGARSNDL	ANRQKVWEVITCGARSNDLL	NRQKVWEVITCGARSNDLLI	RQKVWEVITCGARSNDLLIK	QKVWEVITCGARSNDLLIKR	KVWEVITCGARSNDLLIKRG	VWEVITCGARSNDLLIKRGW	WEVITCGARSNDLLIKRGWR	EVITCGARSNDLLIKRGWRT	VITCGARSNDLLIKRGWRTS	ITCGARSNDLLIKRGWRTSG	TCGARSNDLLIKRGWRTSGK	CGARSNDLLIKRGWRTSGKS	GARSNDLLIKRGWRTSGKSD	ARSNDLLIKRGWRTSGKSDR	RSNDLLIKRGWRTSGKSDRK	SNDLLIKRGWRTSGKSDRKK	NDLLIKRGWRTSGKSDRKKN	DLLIKRGWRTSGKSDRKKNF	LLIKRGWRTSGKSDRKKNFE	LIKRGWRTSGKSDRKKNFEL	IKRGWRTSGKSDRKKNFELC	KRGWRTSGKSDRKKNFELCR	RGWRTSGKSDRKKNFELCRK
9	YPYDVPDYAG	KCGHYEKEVPTKLDYVPQFL	CGHYEKEVPTKLDYVPQFLR	GHYEKEVPTKLDYVPQFLRW	HYEKEVPTKLDYVPQFLRWL	YEKEVPTKLDYVPQFLRWLT	EKEVPTKLDYVPQFLRWLTE	KEVPTKLDYVPQFLRWLTEW	EVPTKLDYVPQFLRWLTEWI	VPTKLDYVPQFLRWLTEWIE	PTKLDYVPQFLRWLTEWIED	TKLDYVPQFLRWLTEWIEDF	KLDYVPQFLRWLTEWIEDFY	LDYVPQFLRWLTEWIEDFYR	DYVPQFLRWLTEWIEDFYRE	YVPQFLRWLTEWIEDFYREK	VPQFLRWLTEWIEDFYREKQ	PQFLRWLTEWIEDFYREKQN	QFLRWLTEWIEDFYREKQNL	FLRWLTEWIEDFYREKQNLI	LRWLTEWIEDFYREKQNLID	RWLTEWIEDFYREKQNLIDD	WLTEWIEDFYREKQNLIDDM	LTEWIEDFYREKQNLIDDME	TEWIEDFYREKQNLIDDMER	EWIEDFYREKQNLIDDMERH	WIEDFYREKQNLIDDMERHR	IEDFYREKQNLIDDMERHRE	EDFYREKQNLIDDMERHREE	DFYREKQNLIDDMERHREEC	FYREKQNLIDDMERHREECT	YREKQNLIDDMERHREECTR	REKQNLIDDMERHREECTRE	EKQNLIDDMERHREECTRED	KQNLIDDMERHREECTREDH	QNLIDDMERHREECTREDHK	NLIDDMERHREECTREDHKS	LIDDMERHREECTREDHKSK	IDDMERHREECTREDHKSKE	DDMERHREECTREDHKSKEG	DMERHREECTREDHKSKEGT	MERHREECTREDHKSKEGTS	ERHREECTREDHKSKEGTSY	RHREECTREDHKSKEGTSYC	HREECTREDHKSKEGTSYCS	REECTREDHKSKEGTSYCST	EECTREDHKSKEGTSYCSTC	ECTREDHKSKEGTSYCSTCK	CTREDHKSKEGTSYCSTCKD
10	G	KCGHYEKEVPTKLDYVPQFL	CGHYEKEVPTKLDYVPQFLR	GHYEKEVPTKLDYVPQFLRW	HYEKEVPTKLDYVPQFLRWL	YEKEVPTKLDYVPQFLRWLT	EKEVPTKLDYVPQFLRWLTE	KEVPTKLDYVPQFLRWLTEW	EVPTKLDYVPQFLRWLTEWI	VPTKLDYVPQFLRWLTEWIE	PTKLDYVPQFLRWLTEWIED	TKLDYVPQFLRWLTEWIEDF	KLDYVPQFLRWLTEWIEDFY	LDYVPQFLRWLTEWIEDFYR	DYVPQFLRWLTEWIEDFYRE	YVPQFLRWLTEWIEDFYREK	VPQFLRWLTEWIEDFYREKQ	PQFLRWLTEWIEDFYREKQN	QFLRWLTEWIEDFYREKQNL	FLRWLTEWIEDFYREKQNLI	LRWLTEWIEDFYREKQNLID	RWLTEWIEDFYREKQNLIDD	WLTEWIEDFYREKQNLIDDM	LTEWIEDFYREKQNLIDDME	TEWIEDFYREKQNLIDDMER	EWIEDFYREKQNLIDDMERH	WIEDFYREKQNLIDDMERHR	IEDFYREKQNLIDDMERHRE	EDFYREKQNLIDDMERHREE	DFYREKQNLIDDMERHREEC	FYREKQNLIDDMERHREECT	YREKQNLIDDMERHREECTR	REKQNLIDDMERHREECTRE	EKQNLIDDMERHREECTRED	KQNLIDDMERHREECTREDH	QNLIDDMERHREECTREDHK	NLIDDMERHREECTREDHKS	LIDDMERHREECTREDHKSK	IDDMERHREECTREDHKSKE	DDMERHREECTREDHKSKEG	DMERHREECTREDHKSKEGT	MERHREECTREDHKSKEGTS	ERHREECTREDHKSKEGTSY	RHREECTREDHKSKEGTSYC	HREECTREDHKSKEGTSYCS	REECTREDHKSKEGTSYCST	EECTREDHKSKEGTSYCSTC	ECTREDHKSKEGTSYCSTCK	CTREDHKSKEGTSYCSTCKD
11	YPYDVPDYAG	DKCKKYCECVKKWKTEWENQ	KCKKYCECVKKWKTEWENQE	CKKYCECVKKWKTEWENQEN	KKYCECVKKWKTEWENQENK	KYCECVKKWKTEWENQENKY	YCECVKKWKTEWENQENKYK	CECVKKWKTEWENQENKYKD	ECVKKWKTEWENQENKYKDL	CVKKWKTEWENQENKYKDLY	VKKWKTEWENQENKYKDLYE	KKWKTEWENQENKYKDLYEQ	KWKTEWENQENKYKDLYEQN	WKTEWENQENKYKDLYEQNK	KTEWENQENKYKDLYEQNKN	TEWENQENKYKDLYEQNKNK	EWENQENKYKDLYEQNKNKT	WENQENKYKDLYEQNKNKTS	ENQENKYKDLYEQNKNKTSQ	NQENKYKDLYEQNKNKTSQK	QENKYKDLYEQNKNKTSQKN	ENKYKDLYEQNKNKTSQKNT	NKYKDLYEQNKNKTSQKNTS	KYKDLYEQNKNKTSQKNTSR	YKDLYEQNKNKTSQKNTSRY	KDLYEQNKNKTSQKNTSRYD	DLYEQNKNKTSQKNTSRYDD	LYEQNKNKTSQKNTSRYDDY	YEQNKNKTSQKNTSRYDDYV	EQNKNKTSQKNTSRYDDYVK	QNKNKTSQKNTSRYDDYVKD	NKNKTSQKNTSRYDDYVKDF	KNKTSQKNTSRYDDYVKDFF	NKTSQKNTSRYDDYVKDFFE	KTSQKNTSRYDDYVKDFFEK	TSQKNTSRYDDYVKDFFEKL	SQKNTSRYDDYVKDFFEKLE	QKNTSRYDDYVKDFFEKLEA	KNTSRYDDYVKDFFEKLEAN	NTSRYDDYVKDFFEKLEANY	TSRYDDYVKDFFEKLEANYS	SRYDDYVKDFFEKLEANYSS	RYDDYVKDFFEKLEANYSSL	YDDYVKDFFEKLEANYSSLE	DDYVKDFFEKLEANYSSLEN	DYVKDFFEKLEANYSSLENY	YVKDFFEKLEANYSSLENYI	VKDFFEKLEANYSSLENYIK	KDFFEKLEANYSSLENYIKG
12	G	DKCKKYCECVKKWKTEWENQ	KCKKYCECVKKWKTEWENQE	CKKYCECVKKWKTEWENQEN	KKYCECVKKWKTEWENQENK	KYCECVKKWKTEWENQENKY	YCECVKKWKTEWENQENKYK	CECVKKWKTEWENQENKYKD	ECVKKWKTEWENQENKYKDL	CVKKWKTEWENQENKYKDLY	VKKWKTEWENQENKYKDLYE	KKWKTEWENQENKYKDLYEQ	KWKTEWENQENKYKDLYEQN	WKTEWENQENKYKDLYEQNK	KTEWENQENKYKDLYEQNKN	TEWENQENKYKDLYEQNKNK	EWENQENKYKDLYEQNKNKT	WENQENKYKDLYEQNKNKTS	ENQENKYKDLYEQNKNKTSQ	NQENKYKDLYEQNKNKTSQK	QENKYKDLYEQNKNKTSQKN	ENKYKDLYEQNKNKTSQKNT	NKYKDLYEQNKNKTSQKNTS	KYKDLYEQNKNKTSQKNTSR	YKDLYEQNKNKTSQKNTSRY	KDLYEQNKNKTSQKNTSRYD	DLYEQNKNKTSQKNTSRYDD	LYEQNKNKTSQKNTSRYDDY	YEQNKNKTSQKNTSRYDDYV	EQNKNKTSQKNTSRYDDYVK	QNKNKTSQKNTSRYDDYVKD	NKNKTSQKNTSRYDDYVKDF	KNKTSQKNTSRYDDYVKDFF	NKTSQKNTSRYDDYVKDFFE	KTSQKNTSRYDDYVKDFFEK	TSQKNTSRYDDYVKDFFEKL	SQKNTSRYDDYVKDFFEKLE	QKNTSRYDDYVKDFFEKLEA	KNTSRYDDYVKDFFEKLEAN	NTSRYDDYVKDFFEKLEANY	TSRYDDYVKDFFEKLEANYS	SRYDDYVKDFFEKLEANYSS	RYDDYVKDFFEKLEANYSSL	YDDYVKDFFEKLEANYSSLE	DDYVKDFFEKLEANYSSLEN	DYVKDFFEKLEANYSSLENY	YVKDFFEKLEANYSSLENYI	VKDFFEKLEANYSSLENYIK	KDFFEKLEANYSSLENYIKG
13	YPYDVPDYAG	GDPYFAEYATKLSFILNPSD	DPYFAEYATKLSFILNPSDA	PYFAEYATKLSFILNPSDAN	YFAEYATKLSFILNPSDANN	FAEYATKLSFILNPSDANNP	AEYATKLSFILNPSDANNPS	EYATKLSFILNPSDANNPSG	YATKLSFILNPSDANNPSGE	ATKLSFILNPSDANNPSGET	TKLSFILNPSDANNPSGETA	KLSFILNPSDANNPSGETAN	LSFILNPSDANNPSGETANH	SFILNPSDANNPSGETANHN	FILNPSDANNPSGETANHND	ILNPSDANNPSGETANHNDE	LNPSDANNPSGETANHNDEA	NPSDANNPSGETANHNDEAC	PSDANNPSGETANHNDEACN	SDANNPSGETANHNDEACNC	DANNPSGETANHNDEACNCN	ANNPSGETANHNDEACNCNE	NNPSGETANHNDEACNCNES	NPSGETANHNDEACNCNESG	PSGETANHNDEACNCNESGI	SGETANHNDEACNCNESGIS	GETANHNDEACNCNESGISS	ETANHNDEACNCNESGISSV	TANHNDEACNCNESGISSVG	ANHNDEACNCNESGISSVGQ	NHNDEACNCNESGISSVGQA	HNDEACNCNESGISSVGQAQ	NDEACNCNESGISSVGQAQT	DEACNCNESGISSVGQAQTS	EACNCNESGISSVGQAQTSG	ACNCNESGISSVGQAQTSGP	CNCNESGISSVGQAQTSGPS	NCNESGISSVGQAQTSGPSS	CNESGISSVGQAQTSGPSSN	NESGISSVGQAQTSGPSSNK	ESGISSVGQAQTSGPSSNKT	SGISSVGQAQTSGPSSNKTC	GISSVGQAQTSGPSSNKTCI	ISSVGQAQTSGPSSNKTCIT	SSVGQAQTSGPSSNKTCITH	SVGQAQTSGPSSNKTCITHS	VGQAQTSGPSSNKTCITHSS	GQAQTSGPSSNKTCITHSSI	QAQTSGPSSNKTCITHSSIK
14	G	GDPYFAEYATKLSFILNPSD	DPYFAEYATKLSFILNPSDA	PYFAEYATKLSFILNPSDAN	YFAEYATKLSFILNPSDANN	FAEYATKLSFILNPSDANNP	AEYATKLSFILNPSDANNPS	EYATKLSFILNPSDANNPSG	YATKLSFILNPSDANNPSGE	ATKLSFILNPSDANNPSGET	TKLSFILNPSDANNPSGETA	KLSFILNPSDANNPSGETAN	LSFILNPSDANNPSGETANH	SFILNPSDANNPSGETANHN	FILNPSDANNPSGETANHND	ILNPSDANNPSGETANHNDE	LNPSDANNPSGETANHNDEA	NPSDANNPSGETANHNDEAC	PSDANNPSGETANHNDEACN	SDANNPSGETANHNDEACNC	DANNPSGETANHNDEACNCN	ANNPSGETANHNDEACNCNE	NNPSGETANHNDEACNCNES	NPSGETANHNDEACNCNESG	PSGETANHNDEACNCNESGI	SGETANHNDEACNCNESGIS	GETANHNDEACNCNESGISS	ETANHNDEACNCNESGISSV	TANHNDEACNCNESGISSVG	ANHNDEACNCNESGISSVGQ	NHNDEACNCNESGISSVGQA	HNDEACNCNESGISSVGQAQ	NDEACNCNESGISSVGQAQT	DEACNCNESGISSVGQAQTS	EACNCNESGISSVGQAQTSG	ACNCNESGISSVGQAQTSGP	CNCNESGISSVGQAQTSGPS	NCNESGISSVGQAQTSGPSS	CNESGISSVGQAQTSGPSSN	NESGISSVGQAQTSGPSSNK	ESGISSVGQAQTSGPSSNKT	SGISSVGQAQTSGPSSNKTC	GISSVGQAQTSGPSSNKTCI	ISSVGQAQTSGPSSNKTCIT	SSVGQAQTSGPSSNKTCITH	SVGQAQTSGPSSNKTCITHS	VGQAQTSGPSSNKTCITHSS	GQAQTSGPSSNKTCITHSSI	QAQTSGPSSNKTCITHSSIK
15	YPYDVPDYAG	KTNKKKECKDVKLGVRENDK	TNKKKECKDVKLGVRENDKD	NKKKECKDVKLGVRENDKDL	KKKECKDVKLGVRENDKDLK	KKECKDVKLGVRENDKDLKI	KECKDVKLGVRENDKDLKIC	ECKDVKLGVRENDKDLKICV	CKDVKLGVRENDKDLKICVI	KDVKLGVRENDKDLKICVIE	DVKLGVRENDKDLKICVIED	VKLGVRENDKDLKICVIEDT	KLGVRENDKDLKICVIEDTS	LGVRENDKDLKICVIEDTSL	GVRENDKDLKICVIEDTSLS	VRENDKDLKICVIEDTSLSG	RENDKDLKICVIEDTSLSGV	ENDKDLKICVIEDTSLSGVD	NDKDLKICVIEDTSLSGVDN	DKDLKICVIEDTSLSGVDNC	KDLKICVIEDTSLSGVDNCC	DLKICVIEDTSLSGVDNCCC	LKICVIEDTSLSGVDNCCCQ	KICVIEDTSLSGVDNCCCQD	ICVIEDTSLSGVDNCCCQDL	CVIEDTSLSGVDNCCCQDLL	VIEDTSLSGVDNCCCQDLLG	IEDTSLSGVDNCCCQDLLGI	EDTSLSGVDNCCCQDLLGIL	DTSLSGVDNCCCQDLLGILQ	TSLSGVDNCCCQDLLGILQE	SLSGVDNCCCQDLLGILQEN	LSGVDNCCCQDLLGILQENC	SGVDNCCCQDLLGILQENCS	GVDNCCCQDLLGILQENCSD	VDNCCCQDLLGILQENCSDN	DNCCCQDLLGILQENCSDNK	NCCCQDLLGILQENCSDNKR	CCCQDLLGILQENCSDNKRG	CCQDLLGILQENCSDNKRGS	CQDLLGILQENCSDNKRGSS	QDLLGILQENCSDNKRGSSS	DLLGILQENCSDNKRGSSSN	LLGILQENCSDNKRGSSSND	LGILQENCSDNKRGSSSNDS	GILQENCSDNKRGSSSNDSC	ILQENCSDNKRGSSSNDSCD	LQENCSDNKRGSSSNDSCDN	QENCSDNKRGSSSNDSCDNK
16	G	KTNKKKECKDVKLGVRENDK	TNKKKECKDVKLGVRENDKD	NKKKECKDVKLGVRENDKDL	KKKECKDVKLGVRENDKDLK	KKECKDVKLGVRENDKDLKI	KECKDVKLGVRENDKDLKIC	ECKDVKLGVRENDKDLKICV	CKDVKLGVRENDKDLKICVI	KDVKLGVRENDKDLKICVIE	DVKLGVRENDKDLKICVIED	VKLGVRENDKDLKICVIEDT	KLGVRENDKDLKICVIEDTS	LGVRENDKDLKICVIEDTSL	GVRENDKDLKICVIEDTSLS	VRENDKDLKICVIEDTSLSG	RENDKDLKICVIEDTSLSGV	ENDKDLKICVIEDTSLSGVD	NDKDLKICVIEDTSLSGVDN	DKDLKICVIEDTSLSGVDNC	KDLKICVIEDTSLSGVDNCC	DLKICVIEDTSLSGVDNCCC	LKICVIEDTSLSGVDNCCCQ	KICVIEDTSLSGVDNCCCQD	ICVIEDTSLSGVDNCCCQDL	CVIEDTSLSGVDNCCCQDLL	VIEDTSLSGVDNCCCQDLLG	IEDTSLSGVDNCCCQDLLGI	EDTSLSGVDNCCCQDLLGIL	DTSLSGVDNCCCQDLLGILQ	TSLSGVDNCCCQDLLGILQE	SLSGVDNCCCQDLLGILQEN	LSGVDNCCCQDLLGILQENC	SGVDNCCCQDLLGILQENCS	GVDNCCCQDLLGILQENCSD	VDNCCCQDLLGILQENCSDN	DNCCCQDLLGILQENCSDNK	NCCCQDLLGILQENCSDNKR	CCCQDLLGILQENCSDNKRG	CCQDLLGILQENCSDNKRGS	CQDLLGILQENCSDNKRGSS	QDLLGILQENCSDNKRGSSS	DLLGILQENCSDNKRGSSSN	LLGILQENCSDNKRGSSSND	LGILQENCSDNKRGSSSNDS	GILQENCSDNKRGSSSNDSC	ILQENCSDNKRGSSSNDSCD	LQENCSDNKRGSSSNDSCDN	QENCSDNKRGSSSNDSCDNK
17	YPYDVPDYAG	KNQDECQKKLEKVFASLTNG	NQDECQKKLEKVFASLTNGY	QDECQKKLEKVFASLTNGYK	DECQKKLEKVFASLTNGYKC	ECQKKLEKVFASLTNGYKCD	CQKKLEKVFASLTNGYKCDK	QKKLEKVFASLTNGYKCDKC	KKLEKVFASLTNGYKCDKCK	KLEKVFASLTNGYKCDKCKS	LEKVFASLTNGYKCDKCKSG	EKVFASLTNGYKCDKCKSGT	KVFASLTNGYKCDKCKSGTS	VFASLTNGYKCDKCKSGTSR	FASLTNGYKCDKCKSGTSRS	ASLTNGYKCDKCKSGTSRSK	SLTNGYKCDKCKSGTSRSKK	LTNGYKCDKCKSGTSRSKKK	TNGYKCDKCKSGTSRSKKKW	NGYKCDKCKSGTSRSKKKWI	GYKCDKCKSGTSRSKKKWIW	YKCDKCKSGTSRSKKKWIWK	KCDKCKSGTSRSKKKWIWKK	CDKCKSGTSRSKKKWIWKKS	DKCKSGTSRSKKKWIWKKSS	KCKSGTSRSKKKWIWKKSSG	CKSGTSRSKKKWIWKKSSGN	KSGTSRSKKKWIWKKSSGNE	SGTSRSKKKWIWKKSSGNEE	GTSRSKKKWIWKKSSGNEEG	TSRSKKKWIWKKSSGNEEGL	SRSKKKWIWKKSSGNEEGLQ	RSKKKWIWKKSSGNEEGLQE	SKKKWIWKKSSGNEEGLQEE	KKKWIWKKSSGNEEGLQEEY	KKWIWKKSSGNEEGLQEEYA	KWIWKKSSGNEEGLQEEYAN	WIWKKSSGNEEGLQEEYANT	IWKKSSGNEEGLQEEYANTI	WKKSSGNEEGLQEEYANTIG	KKSSGNEEGLQEEYANTIGL	KSSGNEEGLQEEYANTIGLP	SSGNEEGLQEEYANTIGLPP	SGNEEGLQEEYANTIGLPPR	GNEEGLQEEYANTIGLPPRT	NEEGLQEEYANTIGLPPRTQ	EEGLQEEYANTIGLPPRTQS	EGLQEEYANTIGLPPRTQSL	GLQEEYANTIGLPPRTQSLY
18	G	KNQDECQKKLEKVFASLTNG	NQDECQKKLEKVFASLTNGY	QDECQKKLEKVFASLTNGYK	DECQKKLEKVFASLTNGYKC	ECQKKLEKVFASLTNGYKCD	CQKKLEKVFASLTNGYKCDK	QKKLEKVFASLTNGYKCDKC	KKLEKVFASLTNGYKCDKCK	KLEKVFASLTNGYKCDKCKS	LEKVFASLTNGYKCDKCKSG	EKVFASLTNGYKCDKCKSGT	KVFASLTNGYKCDKCKSGTS	VFASLTNGYKCDKCKSGTSR	FASLTNGYKCDKCKSGTSRS	ASLTNGYKCDKCKSGTSRSK	SLTNGYKCDKCKSGTSRSKK	LTNGYKCDKCKSGTSRSKKK	TNGYKCDKCKSGTSRSKKKW	NGYKCDKCKSGTSRSKKKWI	GYKCDKCKSGTSRSKKKWIW	YKCDKCKSGTSRSKKKWIWK	KCDKCKSGTSRSKKKWIWKK	CDKCKSGTSRSKKKWIWKKS	DKCKSGTSRSKKKWIWKKSS	KCKSGTSRSKKKWIWKKSSG	CKSGTSRSKKKWIWKKSSGN	KSGTSRSKKKWIWKKSSGNE	SGTSRSKKKWIWKKSSGNEE	GTSRSKKKWIWKKSSGNEEG	TSRSKKKWIWKKSSGNEEGL	SRSKKKWIWKKSSGNEEGLQ	RSKKKWIWKKSSGNEEGLQE	SKKKWIWKKSSGNEEGLQEE	KKKWIWKKSSGNEEGLQEEY	KKWIWKKSSGNEEGLQEEYA	KWIWKKSSGNEEGLQEEYAN	WIWKKSSGNEEGLQEEYANT	IWKKSSGNEEGLQEEYANTI	WKKSSGNEEGLQEEYANTIG	KKSSGNEEGLQEEYANTIGL	KSSGNEEGLQEEYANTIGLP	SSGNEEGLQEEYANTIGLPP	SGNEEGLQEEYANTIGLPPR	GNEEGLQEEYANTIGLPPRT	NEEGLQEEYANTIGLPPRTQ	EEGLQEEYANTIGLPPRTQS	EGLQEEYANTIGLPPRTQSL	GLQEEYANTIGLPPRTQSLY
19	YPYDVPDYAG	YLGNLPKLENVCEDVKDINF	LGNLPKLENVCEDVKDINFD	GNLPKLENVCEDVKDINFDT	NLPKLENVCEDVKDINFDTK	LPKLENVCEDVKDINFDTKE	PKLENVCEDVKDINFDTKEK	KLENVCEDVKDINFDTKEKF	LENVCEDVKDINFDTKEKFL	ENVCEDVKDINFDTKEKFLA	NVCEDVKDINFDTKEKFLAG	VCEDVKDINFDTKEKFLAGC	CEDVKDINFDTKEKFLAGCL	EDVKDINFDTKEKFLAGCLI	DVKDINFDTKEKFLAGCLIV	VKDINFDTKEKFLAGCLIVS	KDINFDTKEKFLAGCLIVSF	DINFDTKEKFLAGCLIVSFH	INFDTKEKFLAGCLIVSFHE	NFDTKEKFLAGCLIVSFHEG	FDTKEKFLAGCLIVSFHEGK	DTKEKFLAGCLIVSFHEGKN	TKEKFLAGCLIVSFHEGKNL	KEKFLAGCLIVSFHEGKNLK	EKFLAGCLIVSFHEGKNLKK	KFLAGCLIVSFHEGKNLKKR	FLAGCLIVSFHEGKNLKKRY	LAGCLIVSFHEGKNLKKRYP	AGCLIVSFHEGKNLKKRYPQ	GCLIVSFHEGKNLKKRYPQN	CLIVSFHEGKNLKKRYPQNK	LIVSFHEGKNLKKRYPQNKN	IVSFHEGKNLKKRYPQNKNS	VSFHEGKNLKKRYPQNKNSG	SFHEGKNLKKRYPQNKNSGN	FHEGKNLKKRYPQNKNSGNK	HEGKNLKKRYPQNKNSGNKE	EGKNLKKRYPQNKNSGNKEN	GKNLKKRYPQNKNSGNKENL	KNLKKRYPQNKNSGNKENLC	NLKKRYPQNKNSGNKENLCK	LKKRYPQNKNSGNKENLCKA	KKRYPQNKNSGNKENLCKAL	KRYPQNKNSGNKENLCKALE	RYPQNKNSGNKENLCKALEY	YPQNKNSGNKENLCKALEYS	PQNKNSGNKENLCKALEYSF	QNKNSGNKENLCKALEYSFA	NKNSGNKENLCKALEYSFAD
20	G	YLGNLPKLENVCEDVKDINF	LGNLPKLENVCEDVKDINFD	GNLPKLENVCEDVKDINFDT	NLPKLENVCEDVKDINFDTK	LPKLENVCEDVKDINFDTKE	PKLENVCEDVKDINFDTKEK	KLENVCEDVKDINFDTKEKF	LENVCEDVKDINFDTKEKFL	ENVCEDVKDINFDTKEKFLA	NVCEDVKDINFDTKEKFLAG	VCEDVKDINFDTKEKFLAGC	CEDVKDINFDTKEKFLAGCL	EDVKDINFDTKEKFLAGCLI	DVKDINFDTKEKFLAGCLIV	VKDINFDTKEKFLAGCLIVS	KDINFDTKEKFLAGCLIVSF	DINFDTKEKFLAGCLIVSFH	INFDTKEKFLAGCLIVSFHE	NFDTKEKFLAGCLIVSFHEG	FDTKEKFLAGCLIVSFHEGK	DTKEKFLAGCLIVSFHEGKN	TKEKFLAGCLIVSFHEGKNL	KEKFLAGCLIVSFHEGKNLK	EKFLAGCLIVSFHEGKNLKK	KFLAGCLIVSFHEGKNLKKR	FLAGCLIVSFHEGKNLKKRY	LAGCLIVSFHEGKNLKKRYP	AGCLIVSFHEGKNLKKRYPQ	GCLIVSFHEGKNLKKRYPQN	CLIVSFHEGKNLKKRYPQNK	LIVSFHEGKNLKKRYPQNKN	IVSFHEGKNLKKRYPQNKNS	VSFHEGKNLKKRYPQNKNSG	SFHEGKNLKKRYPQNKNSGN	FHEGKNLKKRYPQNKNSGNK	HEGKNLKKRYPQNKNSGNKE	EGKNLKKRYPQNKNSGNKEN	GKNLKKRYPQNKNSGNKENL	KNLKKRYPQNKNSGNKENLC	NLKKRYPQNKNSGNKENLCK	LKKRYPQNKNSGNKENLCKA	KKRYPQNKNSGNKENLCKAL	KRYPQNKNSGNKENLCKALE	RYPQNKNSGNKENLCKALEY	YPQNKNSGNKENLCKALEYS	PQNKNSGNKENLCKALEYSF	QNKNSGNKENLCKALEYSFA	NKNSGNKENLCKALEYSFAD
21	YPYDVPDYAG	DYGDLIKGTSIWDNEYTKDL	YGDLIKGTSIWDNEYTKDLE	GDLIKGTSIWDNEYTKDLEL	DLIKGTSIWDNEYTKDLELN	LIKGTSIWDNEYTKDLELNL	IKGTSIWDNEYTKDLELNLQ	KGTSIWDNEYTKDLELNLQN	GTSIWDNEYTKDLELNLQNN	TSIWDNEYTKDLELNLQNNF	SIWDNEYTKDLELNLQNNFG	IWDNEYTKDLELNLQNNFGK	WDNEYTKDLELNLQNNFGKL	DNEYTKDLELNLQNNFGKLF	NEYTKDLELNLQNNFGKLFG	EYTKDLELNLQNNFGKLFGK	YTKDLELNLQNNFGKLFGKY	TKDLELNLQNNFGKLFGKYI	KDLELNLQNNFGKLFGKYIK	DLELNLQNNFGKLFGKYIKK	LELNLQNNFGKLFGKYIKKN	ELNLQNNFGKLFGKYIKKNN	LNLQNNFGKLFGKYIKKNNT	NLQNNFGKLFGKYIKKNNTA	LQNNFGKLFGKYIKKNNTAE	QNNFGKLFGKYIKKNNTAEQ	NNFGKLFGKYIKKNNTAEQD	NFGKLFGKYIKKNNTAEQDT	FGKLFGKYIKKNNTAEQDTS	GKLFGKYIKKNNTAEQDTSY	KLFGKYIKKNNTAEQDTSYS	LFGKYIKKNNTAEQDTSYSS	FGKYIKKNNTAEQDTSYSSL	GKYIKKNNTAEQDTSYSSLD	KYIKKNNTAEQDTSYSSLDE	YIKKNNTAEQDTSYSSLDEL	IKKNNTAEQDTSYSSLDELR	KKNNTAEQDTSYSSLDELRE	KNNTAEQDTSYSSLDELRES	NNTAEQDTSYSSLDELRESW	NTAEQDTSYSSLDELRESWW	TAEQDTSYSSLDELRESWWN	AEQDTSYSSLDELRESWWNT	EQDTSYSSLDELRESWWNTN	QDTSYSSLDELRESWWNTNK	DTSYSSLDELRESWWNTNKK	TSYSSLDELRESWWNTNKKY	SYSSLDELRESWWNTNKKYI	YSSLDELRESWWNTNKKYIW
22	G	DYGDLIKGTSIWDNEYTKDL	YGDLIKGTSIWDNEYTKDLE	GDLIKGTSIWDNEYTKDLEL	DLIKGTSIWDNEYTKDLELN	LIKGTSIWDNEYTKDLELNL	IKGTSIWDNEYTKDLELNLQ	KGTSIWDNEYTKDLELNLQN	GTSIWDNEYTKDLELNLQNN	TSIWDNEYTKDLELNLQNNF	SIWDNEYTKDLELNLQNNFG	IWDNEYTKDLELNLQNNFGK	WDNEYTKDLELNLQNNFGKL	DNEYTKDLELNLQNNFGKLF	NEYTKDLELNLQNNFGKLFG	EYTKDLELNLQNNFGKLFGK	YTKDLELNLQNNFGKLFGKY	TKDLELNLQNNFGKLFGKYI	KDLELNLQNNFGKLFGKYIK	DLELNLQNNFGKLFGKYIKK	LELNLQNNFGKLFGKYIKKN	ELNLQNNFGKLFGKYIKKNN	LNLQNNFGKLFGKYIKKNNT	NLQNNFGKLFGKYIKKNNTA	LQNNFGKLFGKYIKKNNTAE	QNNFGKLFGKYIKKNNTAEQ	NNFGKLFGKYIKKNNTAEQD	NFGKLFGKYIKKNNTAEQDT	FGKLFGKYIKKNNTAEQDTS	GKLFGKYIKKNNTAEQDTSY	KLFGKYIKKNNTAEQDTSYS	LFGKYIKKNNTAEQDTSYSS	FGKYIKKNNTAEQDTSYSSL	GKYIKKNNTAEQDTSYSSLD	KYIKKNNTAEQDTSYSSLDE	YIKKNNTAEQDTSYSSLDEL	IKKNNTAEQDTSYSSLDELR	KKNNTAEQDTSYSSLDELRE	KNNTAEQDTSYSSLDELRES	NNTAEQDTSYSSLDELRESW	NTAEQDTSYSSLDELRESWW	TAEQDTSYSSLDELRESWWN	AEQDTSYSSLDELRESWWNT	EQDTSYSSLDELRESWWNTN	QDTSYSSLDELRESWWNTNK	DTSYSSLDELRESWWNTNKK	TSYSSLDELRESWWNTNKKY	SYSSLDELRESWWNTNKKYI	YSSLDELRESWWNTNKKYIW
23	YPYDVPDYAG	WTAMKHGAEMNITTCNADGS	TAMKHGAEMNITTCNADGSV	AMKHGAEMNITTCNADGSVT	MKHGAEMNITTCNADGSVTG	KHGAEMNITTCNADGSVTGS	HGAEMNITTCNADGSVTGSG	GAEMNITTCNADGSVTGSGS	AEMNITTCNADGSVTGSGSS	EMNITTCNADGSVTGSGSSC	MNITTCNADGSVTGSGSSCD	NITTCNADGSVTGSGSSCDD	ITTCNADGSVTGSGSSCDDI	TTCNADGSVTGSGSSCDDIP	TCNADGSVTGSGSSCDDIPT	CNADGSVTGSGSSCDDIPTI	NADGSVTGSGSSCDDIPTID	ADGSVTGSGSSCDDIPTIDL	DGSVTGSGSSCDDIPTIDLI	GSVTGSGSSCDDIPTIDLIP	SVTGSGSSCDDIPTIDLIPQ	VTGSGSSCDDIPTIDLIPQY	TGSGSSCDDIPTIDLIPQYL	GSGSSCDDIPTIDLIPQYLR	SGSSCDDIPTIDLIPQYLRF	GSSCDDIPTIDLIPQYLRFL	SSCDDIPTIDLIPQYLRFLQ	SCDDIPTIDLIPQYLRFLQE	CDDIPTIDLIPQYLRFLQEW	DDIPTIDLIPQYLRFLQEWV	DIPTIDLIPQYLRFLQEWVE	IPTIDLIPQYLRFLQEWVEN	PTIDLIPQYLRFLQEWVENF	TIDLIPQYLRFLQEWVENFC	IDLIPQYLRFLQEWVENFCE	DLIPQYLRFLQEWVENFCEQ	LIPQYLRFLQEWVENFCEQR	IPQYLRFLQEWVENFCEQRQ	PQYLRFLQEWVENFCEQRQA	QYLRFLQEWVENFCEQRQAK	YLRFLQEWVENFCEQRQAKV	LRFLQEWVENFCEQRQAKVK	RFLQEWVENFCEQRQAKVKD	FLQEWVENFCEQRQAKVKDV	LQEWVENFCEQRQAKVKDVI	QEWVENFCEQRQAKVKDVIT	EWVENFCEQRQAKVKDVITN	WVENFCEQRQAKVKDVITNC	VENFCEQRQAKVKDVITNCK
24	G	WTAMKHGAEMNITTCNADGS	TAMKHGAEMNITTCNADGSV	AMKHGAEMNITTCNADGSVT	MKHGAEMNITTCNADGSVTG	KHGAEMNITTCNADGSVTGS	HGAEMNITTCNADGSVTGSG	GAEMNITTCNADGSVTGSGS	AEMNITTCNADGSVTGSGSS	EMNITTCNADGSVTGSGSSC	MNITTCNADGSVTGSGSSCD	NITTCNADGSVTGSGSSCDD	ITTCNADGSVTGSGSSCDDI	TTCNADGSVTGSGSSCDDIP	TCNADGSVTGSGSSCDDIPT	CNADGSVTGSGSSCDDIPTI	NADGSVTGSGSSCDDIPTID	ADGSVTGSGSSCDDIPTIDL	DGSVTGSGSSCDDIPTIDLI	GSVTGSGSSCDDIPTIDLIP	SVTGSGSSCDDIPTIDLIPQ	VTGSGSSCDDIPTIDLIPQY	TGSGSSCDDIPTIDLIPQYL	GSGSSCDDIPTIDLIPQYLR	SGSSCDDIPTIDLIPQYLRF	GSSCDDIPTIDLIPQYLRFL	SSCDDIPTIDLIPQYLRFLQ	SCDDIPTIDLIPQYLRFLQE	CDDIPTIDLIPQYLRFLQEW	DDIPTIDLIPQYLRFLQEWV	DIPTIDLIPQYLRFLQEWVE	IPTIDLIPQYLRFLQEWVEN	PTIDLIPQYLRFLQEWVENF	TIDLIPQYLRFLQEWVENFC	IDLIPQYLRFLQEWVENFCE	DLIPQYLRFLQEWVENFCEQ	LIPQYLRFLQEWVENFCEQR	IPQYLRFLQEWVENFCEQRQ	PQYLRFLQEWVENFCEQRQA	QYLRFLQEWVENFCEQRQAK	YLRFLQEWVENFCEQRQAKV	LRFLQEWVENFCEQRQAKVK	RFLQEWVENFCEQRQAKVKD	FLQEWVENFCEQRQAKVKDV	LQEWVENFCEQRQAKVKDVI	QEWVENFCEQRQAKVKDVIT	EWVENFCEQRQAKVKDVITN	WVENFCEQRQAKVKDVITNC	VENFCEQRQAKVKDVITNCK
25	YPYDVPDYAG	KSCKESGNKCKTECKTKCKD	SCKESGNKCKTECKTKCKDE	CKESGNKCKTECKTKCKDEC	KESGNKCKTECKTKCKDECE	ESGNKCKTECKTKCKDECEK	SGNKCKTECKTKCKDECEKY	GNKCKTECKTKCKDECEKYK	NKCKTECKTKCKDECEKYKK	KCKTECKTKCKDECEKYKKF	CKTECKTKCKDECEKYKKFI	KTECKTKCKDECEKYKKFIE	TECKTKCKDECEKYKKFIEA	ECKTKCKDECEKYKKFIEAC	CKTKCKDECEKYKKFIEACG	KTKCKDECEKYKKFIEACGT	TKCKDECEKYKKFIEACGTA	KCKDECEKYKKFIEACGTAG	CKDECEKYKKFIEACGTAGG	KDECEKYKKFIEACGTAGGG	DECEKYKKFIEACGTAGGGI	ECEKYKKFIEACGTAGGGIG	CEKYKKFIEACGTAGGGIGT	EKYKKFIEACGTAGGGIGTA	KYKKFIEACGTAGGGIGTAG	YKKFIEACGTAGGGIGTAGS	KKFIEACGTAGGGIGTAGSP	KFIEACGTAGGGIGTAGSPW	FIEACGTAGGGIGTAGSPWS	IEACGTAGGGIGTAGSPWSK	EACGTAGGGIGTAGSPWSKR	ACGTAGGGIGTAGSPWSKRW	CGTAGGGIGTAGSPWSKRWD	GTAGGGIGTAGSPWSKRWDQ	TAGGGIGTAGSPWSKRWDQI	AGGGIGTAGSPWSKRWDQIY	GGGIGTAGSPWSKRWDQIYK	GGIGTAGSPWSKRWDQIYKR	GIGTAGSPWSKRWDQIYKRY	IGTAGSPWSKRWDQIYKRYS	GTAGSPWSKRWDQIYKRYSK	TAGSPWSKRWDQIYKRYSKH	AGSPWSKRWDQIYKRYSKHI	GSPWSKRWDQIYKRYSKHIE	SPWSKRWDQIYKRYSKHIED	PWSKRWDQIYKRYSKHIEDA	WSKRWDQIYKRYSKHIEDAK	SKRWDQIYKRYSKHIEDAKR	KRWDQIYKRYSKHIEDAKRN
26	G	KSCKESGNKCKTECKTKCKD	SCKESGNKCKTECKTKCKDE	CKESGNKCKTECKTKCKDEC	KESGNKCKTECKTKCKDECE	ESGNKCKTECKTKCKDECEK	SGNKCKTECKTKCKDECEKY	GNKCKTECKTKCKDECEKYK	NKCKTECKTKCKDECEKYKK	KCKTECKTKCKDECEKYKKF	CKTECKTKCKDECEKYKKFI	KTECKTKCKDECEKYKKFIE	TECKTKCKDECEKYKKFIEA	ECKTKCKDECEKYKKFIEAC	CKTKCKDECEKYKKFIEACG	KTKCKDECEKYKKFIEACGT	TKCKDECEKYKKFIEACGTA	KCKDECEKYKKFIEACGTAG	CKDECEKYKKFIEACGTAGG	KDECEKYKKFIEACGTAGGG	DECEKYKKFIEACGTAGGGI	ECEKYKKFIEACGTAGGGIG	CEKYKKFIEACGTAGGGIGT	EKYKKFIEACGTAGGGIGTA	KYKKFIEACGTAGGGIGTAG	YKKFIEACGTAGGGIGTAGS	KKFIEACGTAGGGIGTAGSP	KFIEACGTAGGGIGTAGSPW	FIEACGTAGGGIGTAGSPWS	IEACGTAGGGIGTAGSPWSK	EACGTAGGGIGTAGSPWSKR	ACGTAGGGIGTAGSPWSKRW	CGTAGGGIGTAGSPWSKRWD	GTAGGGIGTAGSPWSKRWDQ	TAGGGIGTAGSPWSKRWDQI	AGGGIGTAGSPWSKRWDQIY	GGGIGTAGSPWSKRWDQIYK	GGIGTAGSPWSKRWDQIYKR	GIGTAGSPWSKRWDQIYKRY	IGTAGSPWSKRWDQIYKRYS	GTAGSPWSKRWDQIYKRYSK	TAGSPWSKRWDQIYKRYSKH	AGSPWSKRWDQIYKRYSKHI	GSPWSKRWDQIYKRYSKHIE	SPWSKRWDQIYKRYSKHIED	PWSKRWDQIYKRYSKHIEDA	WSKRWDQIYKRYSKHIEDAK	SKRWDQIYKRYSKHIEDAKR	KRWDQIYKRYSKHIEDAKRN
27	YPYDVPDYAG	NRKAGTKNCGTSSTTNAAAS	RKAGTKNCGTSSTTNAAAST	KAGTKNCGTSSTTNAAASTD	AGTKNCGTSSTTNAAASTDE	GTKNCGTSSTTNAAASTDEN	TKNCGTSSTTNAAASTDENK	KNCGTSSTTNAAASTDENKC	NCGTSSTTNAAASTDENKCV	CGTSSTTNAAASTDENKCVQ	GTSSTTNAAASTDENKCVQS	TSSTTNAAASTDENKCVQSD	SSTTNAAASTDENKCVQSDI	STTNAAASTDENKCVQSDID	TTNAAASTDENKCVQSDIDS	TNAAASTDENKCVQSDIDSF	NAAASTDENKCVQSDIDSFF	AAASTDENKCVQSDIDSFFK	AASTDENKCVQSDIDSFFKH	ASTDENKCVQSDIDSFFKHL	STDENKCVQSDIDSFFKHLI	TDENKCVQSDIDSFFKHLID	DENKCVQSDIDSFFKHLIDI	ENKCVQSDIDSFFKHLIDIG	NKCVQSDIDSFFKHLIDIGL	KCVQSDIDSFFKHLIDIGLT	CVQSDIDSFFKHLIDIGLTT	VQSDIDSFFKHLIDIGLTTP	QSDIDSFFKHLIDIGLTTPS	SDIDSFFKHLIDIGLTTPSS	DIDSFFKHLIDIGLTTPSSY	IDSFFKHLIDIGLTTPSSYL	DSFFKHLIDIGLTTPSSYLS	SFFKHLIDIGLTTPSSYLSN	FFKHLIDIGLTTPSSYLSNV	FKHLIDIGLTTPSSYLSNVL	KHLIDIGLTTPSSYLSNVLD	HLIDIGLTTPSSYLSNVLDD	LIDIGLTTPSSYLSNVLDDN	IDIGLTTPSSYLSNVLDDNI	DIGLTTPSSYLSNVLDDNIC	IGLTTPSSYLSNVLDDNICG	GLTTPSSYLSNVLDDNICGA	LTTPSSYLSNVLDDNICGAD	TTPSSYLSNVLDDNICGADK	TPSSYLSNVLDDNICGADKA	PSSYLSNVLDDNICGADKAP	SSYLSNVLDDNICGADKAPW	SYLSNVLDDNICGADKAPWT
28	G	NRKAGTKNCGTSSTTNAAAS	RKAGTKNCGTSSTTNAAAST	KAGTKNCGTSSTTNAAASTD	AGTKNCGTSSTTNAAASTDE	GTKNCGTSSTTNAAASTDEN	TKNCGTSSTTNAAASTDENK	KNCGTSSTTNAAASTDENKC	NCGTSSTTNAAASTDENKCV	CGTSSTTNAAASTDENKCVQ	GTSSTTNAAASTDENKCVQS	TSSTTNAAASTDENKCVQSD	SSTTNAAASTDENKCVQSDI	STTNAAASTDENKCVQSDID	TTNAAASTDENKCVQSDIDS	TNAAASTDENKCVQSDIDSF	NAAASTDENKCVQSDIDSFF	AAASTDENKCVQSDIDSFFK	AASTDENKCVQSDIDSFFKH	ASTDENKCVQSDIDSFFKHL	STDENKCVQSDIDSFFKHLI	TDENKCVQSDIDSFFKHLID	DENKCVQSDIDSFFKHLIDI	ENKCVQSDIDSFFKHLIDIG	NKCVQSDIDSFFKHLIDIGL	KCVQSDIDSFFKHLIDIGLT	CVQSDIDSFFKHLIDIGLTT	VQSDIDSFFKHLIDIGLTTP	QSDIDSFFKHLIDIGLTTPS	SDIDSFFKHLIDIGLTTPSS	DIDSFFKHLIDIGLTTPSSY	IDSFFKHLIDIGLTTPSSYL	DSFFKHLIDIGLTTPSSYLS	SFFKHLIDIGLTTPSSYLSN	FFKHLIDIGLTTPSSYLSNV	FKHLIDIGLTTPSSYLSNVL	KHLIDIGLTTPSSYLSNVLD	HLIDIGLTTPSSYLSNVLDD	LIDIGLTTPSSYLSNVLDDN	IDIGLTTPSSYLSNVLDDNI	DIGLTTPSSYLSNVLDDNIC	IGLTTPSSYLSNVLDDNICG	GLTTPSSYLSNVLDDNICGA	LTTPSSYLSNVLDDNICGAD	TTPSSYLSNVLDDNICGADK	TPSSYLSNVLDDNICGADKA	PSSYLSNVLDDNICGADKAP	SSYLSNVLDDNICGADKAPW	SYLSNVLDDNICGADKAPWT
29	YPYDVPDYAG	TTYTTYTTTEKCNKERDKSK	TYTTYTTTEKCNKERDKSKS	YTTYTTTEKCNKERDKSKSQ	TTYTTTEKCNKERDKSKSQS	TYTTTEKCNKERDKSKSQSS	YTTTEKCNKERDKSKSQSSD	TTTEKCNKERDKSKSQSSDT	TTEKCNKERDKSKSQSSDTL	TEKCNKERDKSKSQSSDTLV	EKCNKERDKSKSQSSDTLVV	KCNKERDKSKSQSSDTLVVV	CNKERDKSKSQSSDTLVVVN	NKERDKSKSQSSDTLVVVNV	KERDKSKSQSSDTLVVVNVP	ERDKSKSQSSDTLVVVNVPS	RDKSKSQSSDTLVVVNVPSP	DKSKSQSSDTLVVVNVPSPL	KSKSQSSDTLVVVNVPSPLG	SKSQSSDTLVVVNVPSPLGN	KSQSSDTLVVVNVPSPLGNT	SQSSDTLVVVNVPSPLGNTP	QSSDTLVVVNVPSPLGNTPY	SSDTLVVVNVPSPLGNTPYR	SDTLVVVNVPSPLGNTPYRY	DTLVVVNVPSPLGNTPYRYK	TLVVVNVPSPLGNTPYRYKY	LVVVNVPSPLGNTPYRYKYA	VVVNVPSPLGNTPYRYKYAC	VVNVPSPLGNTPYRYKYACQ	VNVPSPLGNTPYRYKYACQC	NVPSPLGNTPYRYKYACQCK	VPSPLGNTPYRYKYACQCKI	PSPLGNTPYRYKYACQCKIP	SPLGNTPYRYKYACQCKIPT	PLGNTPYRYKYACQCKIPTN	LGNTPYRYKYACQCKIPTNE	GNTPYRYKYACQCKIPTNEE	NTPYRYKYACQCKIPTNEET	TPYRYKYACQCKIPTNEETC	PYRYKYACQCKIPTNEETCD	YRYKYACQCKIPTNEETCDD	RYKYACQCKIPTNEETCDDR	YKYACQCKIPTNEETCDDRK	KYACQCKIPTNEETCDDRKE	YACQCKIPTNEETCDDRKEY	ACQCKIPTNEETCDDRKEYM	CQCKIPTNEETCDDRKEYMN	QCKIPTNEETCDDRKEYMNQ
30	G	TTYTTYTTTEKCNKERDKSK	TYTTYTTTEKCNKERDKSKS	YTTYTTTEKCNKERDKSKSQ	TTYTTTEKCNKERDKSKSQS	TYTTTEKCNKERDKSKSQSS	YTTTEKCNKERDKSKSQSSD	TTTEKCNKERDKSKSQSSDT	TTEKCNKERDKSKSQSSDTL	TEKCNKERDKSKSQSSDTLV	EKCNKERDKSKSQSSDTLVV	KCNKERDKSKSQSSDTLVVV	CNKERDKSKSQSSDTLVVVN	NKERDKSKSQSSDTLVVVNV	KERDKSKSQSSDTLVVVNVP	ERDKSKSQSSDTLVVVNVPS	RDKSKSQSSDTLVVVNVPSP	DKSKSQSSDTLVVVNVPSPL	KSKSQSSDTLVVVNVPSPLG	SKSQSSDTLVVVNVPSPLGN	KSQSSDTLVVVNVPSPLGNT	SQSSDTLVVVNVPSPLGNTP	QSSDTLVVVNVPSPLGNTPY	SSDTLVVVNVPSPLGNTPYR	SDTLVVVNVPSPLGNTPYRY	DTLVVVNVPSPLGNTPYRYK	TLVVVNVPSPLGNTPYRYKY	LVVVNVPSPLGNTPYRYKYA	VVVNVPSPLGNTPYRYKYAC	VVNVPSPLGNTPYRYKYACQ	VNVPSPLGNTPYRYKYACQC	NVPSPLGNTPYRYKYACQCK	VPSPLGNTPYRYKYACQCKI	PSPLGNTPYRYKYACQCKIP	SPLGNTPYRYKYACQCKIPT	PLGNTPYRYKYACQCKIPTN	LGNTPYRYKYACQCKIPTNE	GNTPYRYKYACQCKIPTNEE	NTPYRYKYACQCKIPTNEET	TPYRYKYACQCKIPTNEETC	PYRYKYACQCKIPTNEETCD	YRYKYACQCKIPTNEETCDD	RYKYACQCKIPTNEETCDDR	YKYACQCKIPTNEETCDDRK	KYACQCKIPTNEETCDDRKE	YACQCKIPTNEETCDDRKEY	ACQCKIPTNEETCDDRKEYM	CQCKIPTNEETCDDRKEYMN	QCKIPTNEETCDDRKEYMNQ
31	YPYDVPDYAG	QWSCGSARTMKRGYKNDNYE	WSCGSARTMKRGYKNDNYEL	SCGSARTMKRGYKNDNYELC	CGSARTMKRGYKNDNYELCK	GSARTMKRGYKNDNYELCKY	SARTMKRGYKNDNYELCKYN	ARTMKRGYKNDNYELCKYNG	RTMKRGYKNDNYELCKYNGV	TMKRGYKNDNYELCKYNGVD	MKRGYKNDNYELCKYNGVDV	KRGYKNDNYELCKYNGVDVK	RGYKNDNYELCKYNGVDVKP	GYKNDNYELCKYNGVDVKPT	YKNDNYELCKYNGVDVKPTT	KNDNYELCKYNGVDVKPTTV	NDNYELCKYNGVDVKPTTVR	DNYELCKYNGVDVKPTTVRS	NYELCKYNGVDVKPTTVRSN	YELCKYNGVDVKPTTVRSNS	ELCKYNGVDVKPTTVRSNSS	LCKYNGVDVKPTTVRSNSSK	CKYNGVDVKPTTVRSNSSKL	KYNGVDVKPTTVRSNSSKLD	YNGVDVKPTTVRSNSSKLDG	NGVDVKPTTVRSNSSKLDGN	GVDVKPTTVRSNSSKLDGND	VDVKPTTVRSNSSKLDGNDV	DVKPTTVRSNSSKLDGNDVT	VKPTTVRSNSSKLDGNDVTF	KPTTVRSNSSKLDGNDVTFF	PTTVRSNSSKLDGNDVTFFN	TTVRSNSSKLDGNDVTFFNL	TVRSNSSKLDGNDVTFFNLF	VRSNSSKLDGNDVTFFNLFE	RSNSSKLDGNDVTFFNLFEQ	SNSSKLDGNDVTFFNLFEQW	NSSKLDGNDVTFFNLFEQWN	SSKLDGNDVTFFNLFEQWNK	SKLDGNDVTFFNLFEQWNKE	KLDGNDVTFFNLFEQWNKEI	LDGNDVTFFNLFEQWNKEIQ	DGNDVTFFNLFEQWNKEIQY	GNDVTFFNLFEQWNKEIQYQ	NDVTFFNLFEQWNKEIQYQI	DVTFFNLFEQWNKEIQYQIE	VTFFNLFEQWNKEIQYQIEQ	TFFNLFEQWNKEIQYQIEQY	FFNLFEQWNKEIQYQIEQYM
32	G	QWSCGSARTMKRGYKNDNYE	WSCGSARTMKRGYKNDNYEL	SCGSARTMKRGYKNDNYELC	CGSARTMKRGYKNDNYELCK	GSARTMKRGYKNDNYELCKY	SARTMKRGYKNDNYELCKYN	ARTMKRGYKNDNYELCKYNG	RTMKRGYKNDNYELCKYNGV	TMKRGYKNDNYELCKYNGVD	MKRGYKNDNYELCKYNGVDV	KRGYKNDNYELCKYNGVDVK	RGYKNDNYELCKYNGVDVKP	GYKNDNYELCKYNGVDVKPT	YKNDNYELCKYNGVDVKPTT	KNDNYELCKYNGVDVKPTTV	NDNYELCKYNGVDVKPTTVR	DNYELCKYNGVDVKPTTVRS	NYELCKYNGVDVKPTTVRSN	YELCKYNGVDVKPTTVRSNS	ELCKYNGVDVKPTTVRSNSS	LCKYNGVDVKPTTVRSNSSK	CKYNGVDVKPTTVRSNSSKL	KYNGVDVKPTTVRSNSSKLD	YNGVDVKPTTVRSNSSKLDG	NGVDVKPTTVRSNSSKLDGN	GVDVKPTTVRSNSSKLDGND	VDVKPTTVRSNSSKLDGNDV	DVKPTTVRSNSSKLDGNDVT	VKPTTVRSNSSKLDGNDVTF	KPTTVRSNSSKLDGNDVTFF	PTTVRSNSSKLDGNDVTFFN	TTVRSNSSKLDGNDVTFFNL	TVRSNSSKLDGNDVTFFNLF	VRSNSSKLDGNDVTFFNLFE	RSNSSKLDGNDVTFFNLFEQ	SNSSKLDGNDVTFFNLFEQW	NSSKLDGNDVTFFNLFEQWN	SSKLDGNDVTFFNLFEQWNK	SKLDGNDVTFFNLFEQWNKE	KLDGNDVTFFNLFEQWNKEI	LDGNDVTFFNLFEQWNKEIQ	DGNDVTFFNLFEQWNKEIQY	GNDVTFFNLFEQWNKEIQYQ	NDVTFFNLFEQWNKEIQYQI	DVTFFNLFEQWNKEIQYQIE	VTFFNLFEQWNKEIQYQIEQ	TFFNLFEQWNKEIQYQIEQY	FFNLFEQWNKEIQYQIEQYM
33	YPYDVPDYAG	MTNANISCIDEKEVLDSVSD	TNANISCIDEKEVLDSVSDE	NANISCIDEKEVLDSVSDEG	ANISCIDEKEVLDSVSDEGT	NISCIDEKEVLDSVSDEGTP	ISCIDEKEVLDSVSDEGTPK	SCIDEKEVLDSVSDEGTPKV	CIDEKEVLDSVSDEGTPKVR	IDEKEVLDSVSDEGTPKVRG	DEKEVLDSVSDEGTPKVRGG	EKEVLDSVSDEGTPKVRGGY	KEVLDSVSDEGTPKVRGGYE	EVLDSVSDEGTPKVRGGYED	VLDSVSDEGTPKVRGGYEDG	LDSVSDEGTPKVRGGYEDGR	DSVSDEGTPKVRGGYEDGRN	SVSDEGTPKVRGGYEDGRNN	VSDEGTPKVRGGYEDGRNNN	SDEGTPKVRGGYEDGRNNNT	DEGTPKVRGGYEDGRNNNTD	EGTPKVRGGYEDGRNNNTDQ	GTPKVRGGYEDGRNNNTDQG	TPKVRGGYEDGRNNNTDQGT	PKVRGGYEDGRNNNTDQGTN	KVRGGYEDGRNNNTDQGTNC	VRGGYEDGRNNNTDQGTNCK	RGGYEDGRNNNTDQGTNCKE	GGYEDGRNNNTDQGTNCKEK	GYEDGRNNNTDQGTNCKEKC	YEDGRNNNTDQGTNCKEKCK	EDGRNNNTDQGTNCKEKCKC	DGRNNNTDQGTNCKEKCKCY	GRNNNTDQGTNCKEKCKCYK	RNNNTDQGTNCKEKCKCYKL	NNNTDQGTNCKEKCKCYKLW	NNTDQGTNCKEKCKCYKLWI	NTDQGTNCKEKCKCYKLWIE	TDQGTNCKEKCKCYKLWIEK	DQGTNCKEKCKCYKLWIEKI	QGTNCKEKCKCYKLWIEKIN	GTNCKEKCKCYKLWIEKIND	TNCKEKCKCYKLWIEKINDQ	NCKEKCKCYKLWIEKINDQW	CKEKCKCYKLWIEKINDQWG	KEKCKCYKLWIEKINDQWGK	EKCKCYKLWIEKINDQWGKQ	KCKCYKLWIEKINDQWGKQK	CKCYKLWIEKINDQWGKQKD
34	G	MTNANISCIDEKEVLDSVSD	TNANISCIDEKEVLDSVSDE	NANISCIDEKEVLDSVSDEG	ANISCIDEKEVLDSVSDEGT	NISCIDEKEVLDSVSDEGTP	ISCIDEKEVLDSVSDEGTPK	SCIDEKEVLDSVSDEGTPKV	CIDEKEVLDSVSDEGTPKVR	IDEKEVLDSVSDEGTPKVRG	DEKEVLDSVSDEGTPKVRGG	EKEVLDSVSDEGTPKVRGGY	KEVLDSVSDEGTPKVRGGYE	EVLDSVSDEGTPKVRGGYED	VLDSVSDEGTPKVRGGYEDG	LDSVSDEGTPKVRGGYEDGR	DSVSDEGTPKVRGGYEDGRN	SVSDEGTPKVRGGYEDGRNN	VSDEGTPKVRGGYEDGRNNN	SDEGTPKVRGGYEDGRNNNT	DEGTPKVRGGYEDGRNNNTD	EGTPKVRGGYEDGRNNNTDQ	GTPKVRGGYEDGRNNNTDQG	TPKVRGGYEDGRNNNTDQGT	PKVRGGYEDGRNNNTDQGTN	KVRGGYEDGRNNNTDQGTNC	VRGGYEDGRNNNTDQGTNCK	RGGYEDGRNNNTDQGTNCKE	GGYEDGRNNNTDQGTNCKEK	GYEDGRNNNTDQGTNCKEKC	YEDGRNNNTDQGTNCKEKCK	EDGRNNNTDQGTNCKEKCKC	DGRNNNTDQGTNCKEKCKCY	GRNNNTDQGTNCKEKCKCYK	RNNNTDQGTNCKEKCKCYKL	NNNTDQGTNCKEKCKCYKLW	NNTDQGTNCKEKCKCYKLWI	NTDQGTNCKEKCKCYKLWIE	TDQGTNCKEKCKCYKLWIEK	DQGTNCKEKCKCYKLWIEKI	QGTNCKEKCKCYKLWIEKIN	GTNCKEKCKCYKLWIEKIND	TNCKEKCKCYKLWIEKINDQ	NCKEKCKCYKLWIEKINDQW	CKEKCKCYKLWIEKINDQWG	KEKCKCYKLWIEKINDQWGK	EKCKCYKLWIEKINDQWGKQ	KCKCYKLWIEKINDQWGKQK	CKCYKLWIEKINDQWGKQKD
35	YPYDVPDYAG	DNYNKFRSKQIYDANKGSQN	NYNKFRSKQIYDANKGSQNK	YNKFRSKQIYDANKGSQNKK	NKFRSKQIYDANKGSQNKKV	KFRSKQIYDANKGSQNKKVV	FRSKQIYDANKGSQNKKVVS	RSKQIYDANKGSQNKKVVSL	SKQIYDANKGSQNKKVVSLS	KQIYDANKGSQNKKVVSLSN	QIYDANKGSQNKKVVSLSNF	IYDANKGSQNKKVVSLSNFL	YDANKGSQNKKVVSLSNFLF	DANKGSQNKKVVSLSNFLFF	ANKGSQNKKVVSLSNFLFFS	NKGSQNKKVVSLSNFLFFSC	KGSQNKKVVSLSNFLFFSCW	GSQNKKVVSLSNFLFFSCWE	SQNKKVVSLSNFLFFSCWEE	QNKKVVSLSNFLFFSCWEEY	NKKVVSLSNFLFFSCWEEYI	KKVVSLSNFLFFSCWEEYIQ	KVVSLSNFLFFSCWEEYIQK	VVSLSNFLFFSCWEEYIQKY	VSLSNFLFFSCWEEYIQKYF	SLSNFLFFSCWEEYIQKYFN	LSNFLFFSCWEEYIQKYFNG	SNFLFFSCWEEYIQKYFNGD	NFLFFSCWEEYIQKYFNGDW	FLFFSCWEEYIQKYFNGDWS	LFFSCWEEYIQKYFNGDWSK	FFSCWEEYIQKYFNGDWSKI	FSCWEEYIQKYFNGDWSKIK	SCWEEYIQKYFNGDWSKIKN	CWEEYIQKYFNGDWSKIKNI	WEEYIQKYFNGDWSKIKNIG	EEYIQKYFNGDWSKIKNIGS	EYIQKYFNGDWSKIKNIGSD	YIQKYFNGDWSKIKNIGSDT	IQKYFNGDWSKIKNIGSDTF	QKYFNGDWSKIKNIGSDTFE	KYFNGDWSKIKNIGSDTFEF	YFNGDWSKIKNIGSDTFEFL	FNGDWSKIKNIGSDTFEFLI	NGDWSKIKNIGSDTFEFLIK	GDWSKIKNIGSDTFEFLIKK	DWSKIKNIGSDTFEFLIKKC	WSKIKNIGSDTFEFLIKKCG	SKIKNIGSDTFEFLIKKCGN
36	G	DNYNKFRSKQIYDANKGSQN	NYNKFRSKQIYDANKGSQNK	YNKFRSKQIYDANKGSQNKK	NKFRSKQIYDANKGSQNKKV	KFRSKQIYDANKGSQNKKVV	FRSKQIYDANKGSQNKKVVS	RSKQIYDANKGSQNKKVVSL	SKQIYDANKGSQNKKVVSLS	KQIYDANKGSQNKKVVSLSN	QIYDANKGSQNKKVVSLSNF	IYDANKGSQNKKVVSLSNFL	YDANKGSQNKKVVSLSNFLF	DANKGSQNKKVVSLSNFLFF	ANKGSQNKKVVSLSNFLFFS	NKGSQNKKVVSLSNFLFFSC	KGSQNKKVVSLSNFLFFSCW	GSQNKKVVSLSNFLFFSCWE	SQNKKVVSLSNFLFFSCWEE	QNKKVVSLSNFLFFSCWEEY	NKKVVSLSNFLFFSCWEEYI	KKVVSLSNFLFFSCWEEYIQ	KVVSLSNFLFFSCWEEYIQK	VVSLSNFLFFSCWEEYIQKY	VSLSNFLFFSCWEEYIQKYF	SLSNFLFFSCWEEYIQKYFN	LSNFLFFSCWEEYIQKYFNG	SNFLFFSCWEEYIQKYFNGD	NFLFFSCWEEYIQKYFNGDW	FLFFSCWEEYIQKYFNGDWS	LFFSCWEEYIQKYFNGDWSK	FFSCWEEYIQKYFNGDWSKI	FSCWEEYIQKYFNGDWSKIK	SCWEEYIQKYFNGDWSKIKN	CWEEYIQKYFNGDWSKIKNI	WEEYIQKYFNGDWSKIKNIG	EEYIQKYFNGDWSKIKNIGS	EYIQKYFNGDWSKIKNIGSD	YIQKYFNGDWSKIKNIGSDT	IQKYFNGDWSKIKNIGSDTF	QKYFNGDWSKIKNIGSDTFE	KYFNGDWSKIKNIGSDTFEF	YFNGDWSKIKNIGSDTFEFL	FNGDWSKIKNIGSDTFEFLI	NGDWSKIKNIGSDTFEFLIK	GDWSKIKNIGSDTFEFLIKK	DWSKIKNIGSDTFEFLIKKC	WSKIKNIGSDTFEFLIKKCG	SKIKNIGSDTFEFLIKKCGN
37	YPYDVPDYAG	NNSAHGEEIFNEKLKNAEKK	NSAHGEEIFNEKLKNAEKKC	SAHGEEIFNEKLKNAEKKCK	AHGEEIFNEKLKNAEKKCKE	HGEEIFNEKLKNAEKKCKEN	GEEIFNEKLKNAEKKCKENE	EEIFNEKLKNAEKKCKENES	EIFNEKLKNAEKKCKENEST	IFNEKLKNAEKKCKENESTD	FNEKLKNAEKKCKENESTDT	NEKLKNAEKKCKENESTDTN	EKLKNAEKKCKENESTDTNI	KLKNAEKKCKENESTDTNIN	LKNAEKKCKENESTDTNINK	KNAEKKCKENESTDTNINKS	NAEKKCKENESTDTNINKSE	AEKKCKENESTDTNINKSET	EKKCKENESTDTNINKSETS	KKCKENESTDTNINKSETSC	KCKENESTDTNINKSETSCD	CKENESTDTNINKSETSCDL	KENESTDTNINKSETSCDLN	ENESTDTNINKSETSCDLNA	NESTDTNINKSETSCDLNAT	ESTDTNINKSETSCDLNATN	STDTNINKSETSCDLNATNY	TDTNINKSETSCDLNATNYI	DTNINKSETSCDLNATNYIR	TNINKSETSCDLNATNYIRG	NINKSETSCDLNATNYIRGC	INKSETSCDLNATNYIRGCQ	NKSETSCDLNATNYIRGCQS	KSETSCDLNATNYIRGCQSK	SETSCDLNATNYIRGCQSKT	ETSCDLNATNYIRGCQSKTY	TSCDLNATNYIRGCQSKTYD	SCDLNATNYIRGCQSKTYDG	CDLNATNYIRGCQSKTYDGK	DLNATNYIRGCQSKTYDGKI	LNATNYIRGCQSKTYDGKIF	NATNYIRGCQSKTYDGKIFP	ATNYIRGCQSKTYDGKIFPG	TNYIRGCQSKTYDGKIFPGK	NYIRGCQSKTYDGKIFPGKG	YIRGCQSKTYDGKIFPGKGG	IRGCQSKTYDGKIFPGKGGE	RGCQSKTYDGKIFPGKGGEK	GCQSKTYDGKIFPGKGGEKQ
38	G	NNSAHGEEIFNEKLKNAEKK	NSAHGEEIFNEKLKNAEKKC	SAHGEEIFNEKLKNAEKKCK	AHGEEIFNEKLKNAEKKCKE	HGEEIFNEKLKNAEKKCKEN	GEEIFNEKLKNAEKKCKENE	EEIFNEKLKNAEKKCKENES	EIFNEKLKNAEKKCKENEST	IFNEKLKNAEKKCKENESTD	FNEKLKNAEKKCKENESTDT	NEKLKNAEKKCKENESTDTN	EKLKNAEKKCKENESTDTNI	KLKNAEKKCKENESTDTNIN	LKNAEKKCKENESTDTNINK	KNAEKKCKENESTDTNINKS	NAEKKCKENESTDTNINKSE	AEKKCKENESTDTNINKSET	EKKCKENESTDTNINKSETS	KKCKENESTDTNINKSETSC	KCKENESTDTNINKSETSCD	CKENESTDTNINKSETSCDL	KENESTDTNINKSETSCDLN	ENESTDTNINKSETSCDLNA	NESTDTNINKSETSCDLNAT	ESTDTNINKSETSCDLNATN	STDTNINKSETSCDLNATNY	TDTNINKSETSCDLNATNYI	DTNINKSETSCDLNATNYIR	TNINKSETSCDLNATNYIRG	NINKSETSCDLNATNYIRGC	INKSETSCDLNATNYIRGCQ	NKSETSCDLNATNYIRGCQS	KSETSCDLNATNYIRGCQSK	SETSCDLNATNYIRGCQSKT	ETSCDLNATNYIRGCQSKTY	TSCDLNATNYIRGCQSKTYD	SCDLNATNYIRGCQSKTYDG	CDLNATNYIRGCQSKTYDGK	DLNATNYIRGCQSKTYDGKI	LNATNYIRGCQSKTYDGKIF	NATNYIRGCQSKTYDGKIFP	ATNYIRGCQSKTYDGKIFPG	TNYIRGCQSKTYDGKIFPGK	NYIRGCQSKTYDGKIFPGKG	YIRGCQSKTYDGKIFPGKGG	IRGCQSKTYDGKIFPGKGGE	RGCQSKTYDGKIFPGKGGEK	GCQSKTYDGKIFPGKGGEKQ
39	YPYDVPDYAG	QWICKDTIIHGDTNGACIPP	WICKDTIIHGDTNGACIPPR	ICKDTIIHGDTNGACIPPRT	CKDTIIHGDTNGACIPPRTQ	KDTIIHGDTNGACIPPRTQN	DTIIHGDTNGACIPPRTQNL	TIIHGDTNGACIPPRTQNLC	IIHGDTNGACIPPRTQNLCV	IHGDTNGACIPPRTQNLCVG	HGDTNGACIPPRTQNLCVGE	GDTNGACIPPRTQNLCVGEL	DTNGACIPPRTQNLCVGELW	TNGACIPPRTQNLCVGELWD	NGACIPPRTQNLCVGELWDK	GACIPPRTQNLCVGELWDKS	ACIPPRTQNLCVGELWDKSY	CIPPRTQNLCVGELWDKSYG	IPPRTQNLCVGELWDKSYGG	PPRTQNLCVGELWDKSYGGR	PRTQNLCVGELWDKSYGGRS	RTQNLCVGELWDKSYGGRSN	TQNLCVGELWDKSYGGRSNI	QNLCVGELWDKSYGGRSNIK	NLCVGELWDKSYGGRSNIKN	LCVGELWDKSYGGRSNIKND	CVGELWDKSYGGRSNIKNDT	VGELWDKSYGGRSNIKNDTK	GELWDKSYGGRSNIKNDTKE	ELWDKSYGGRSNIKNDTKEL	LWDKSYGGRSNIKNDTKELL	WDKSYGGRSNIKNDTKELLK	DKSYGGRSNIKNDTKELLKE	KSYGGRSNIKNDTKELLKEK	SYGGRSNIKNDTKELLKEKI	YGGRSNIKNDTKELLKEKIK	GGRSNIKNDTKELLKEKIKN	GRSNIKNDTKELLKEKIKNA	RSNIKNDTKELLKEKIKNAI	SNIKNDTKELLKEKIKNAIH	NIKNDTKELLKEKIKNAIHK	IKNDTKELLKEKIKNAIHKE	KNDTKELLKEKIKNAIHKET	NDTKELLKEKIKNAIHKETE	DTKELLKEKIKNAIHKETEL	TKELLKEKIKNAIHKETELL	KELLKEKIKNAIHKETELLY	ELLKEKIKNAIHKETELLYE	LLKEKIKNAIHKETELLYEY
40	G	QWICKDTIIHGDTNGACIPP	WICKDTIIHGDTNGACIPPR	ICKDTIIHGDTNGACIPPRT	CKDTIIHGDTNGACIPPRTQ	KDTIIHGDTNGACIPPRTQN	DTIIHGDTNGACIPPRTQNL	TIIHGDTNGACIPPRTQNLC	IIHGDTNGACIPPRTQNLCV	IHGDTNGACIPPRTQNLCVG	HGDTNGACIPPRTQNLCVGE	GDTNGACIPPRTQNLCVGEL	DTNGACIPPRTQNLCVGELW	TNGACIPPRTQNLCVGELWD	NGACIPPRTQNLCVGELWDK	GACIPPRTQNLCVGELWDKS	ACIPPRTQNLCVGELWDKSY	CIPPRTQNLCVGELWDKSYG	IPPRTQNLCVGELWDKSYGG	PPRTQNLCVGELWDKSYGGR	PRTQNLCVGELWDKSYGGRS	RTQNLCVGELWDKSYGGRSN	TQNLCVGELWDKSYGGRSNI	QNLCVGELWDKSYGGRSNIK	NLCVGELWDKSYGGRSNIKN	LCVGELWDKSYGGRSNIKND	CVGELWDKSYGGRSNIKNDT	VGELWDKSYGGRSNIKNDTK	GELWDKSYGGRSNIKNDTKE	ELWDKSYGGRSNIKNDTKEL	LWDKSYGGRSNIKNDTKELL	WDKSYGGRSNIKNDTKELLK	DKSYGGRSNIKNDTKELLKE	KSYGGRSNIKNDTKELLKEK	SYGGRSNIKNDTKELLKEKI	YGGRSNIKNDTKELLKEKIK	GGRSNIKNDTKELLKEKIKN	GRSNIKNDTKELLKEKIKNA	RSNIKNDTKELLKEKIKNAI	SNIKNDTKELLKEKIKNAIH	NIKNDTKELLKEKIKNAIHK	IKNDTKELLKEKIKNAIHKE	KNDTKELLKEKIKNAIHKET	NDTKELLKEKIKNAIHKETE	DTKELLKEKIKNAIHKETEL	TKELLKEKIKNAIHKETELL	KELLKEKIKNAIHKETELLY	ELLKEKIKNAIHKETELLYE	LLKEKIKNAIHKETELLYEY
41	YPYDVPDYAG	YHDTGTAIISKNDKKGQKGK	HDTGTAIISKNDKKGQKGKN	DTGTAIISKNDKKGQKGKND	TGTAIISKNDKKGQKGKNDP	GTAIISKNDKKGQKGKNDPN	TAIISKNDKKGQKGKNDPNG	AIISKNDKKGQKGKNDPNGL	IISKNDKKGQKGKNDPNGLP	ISKNDKKGQKGKNDPNGLPK	SKNDKKGQKGKNDPNGLPKG	KNDKKGQKGKNDPNGLPKGF	NDKKGQKGKNDPNGLPKGFC	DKKGQKGKNDPNGLPKGFCH	KKGQKGKNDPNGLPKGFCHA	KGQKGKNDPNGLPKGFCHAV	GQKGKNDPNGLPKGFCHAVQ	QKGKNDPNGLPKGFCHAVQR	KGKNDPNGLPKGFCHAVQRS	GKNDPNGLPKGFCHAVQRSF	KNDPNGLPKGFCHAVQRSFI	NDPNGLPKGFCHAVQRSFID	DPNGLPKGFCHAVQRSFIDY	PNGLPKGFCHAVQRSFIDYK	NGLPKGFCHAVQRSFIDYKN	GLPKGFCHAVQRSFIDYKNM	LPKGFCHAVQRSFIDYKNMI	PKGFCHAVQRSFIDYKNMIL	KGFCHAVQRSFIDYKNMILG	GFCHAVQRSFIDYKNMILGT	FCHAVQRSFIDYKNMILGTS	CHAVQRSFIDYKNMILGTSV	HAVQRSFIDYKNMILGTSVN	AVQRSFIDYKNMILGTSVNI	VQRSFIDYKNMILGTSVNIY	QRSFIDYKNMILGTSVNIYE	RSFIDYKNMILGTSVNIYEH	SFIDYKNMILGTSVNIYEHI	FIDYKNMILGTSVNIYEHIG	IDYKNMILGTSVNIYEHIGK	DYKNMILGTSVNIYEHIGKL	YKNMILGTSVNIYEHIGKLQ	KNMILGTSVNIYEHIGKLQE	NMILGTSVNIYEHIGKLQED	MILGTSVNIYEHIGKLQEDI	ILGTSVNIYEHIGKLQEDIK	LGTSVNIYEHIGKLQEDIKK	GTSVNIYEHIGKLQEDIKKI	TSVNIYEHIGKLQEDIKKII
42	G	YHDTGTAIISKNDKKGQKGK	HDTGTAIISKNDKKGQKGKN	DTGTAIISKNDKKGQKGKND	TGTAIISKNDKKGQKGKNDP	GTAIISKNDKKGQKGKNDPN	TAIISKNDKKGQKGKNDPNG	AIISKNDKKGQKGKNDPNGL	IISKNDKKGQKGKNDPNGLP	ISKNDKKGQKGKNDPNGLPK	SKNDKKGQKGKNDPNGLPKG	KNDKKGQKGKNDPNGLPKGF	NDKKGQKGKNDPNGLPKGFC	DKKGQKGKNDPNGLPKGFCH	KKGQKGKNDPNGLPKGFCHA	KGQKGKNDPNGLPKGFCHAV	GQKGKNDPNGLPKGFCHAVQ	QKGKNDPNGLPKGFCHAVQR	KGKNDPNGLPKGFCHAVQRS	GKNDPNGLPKGFCHAVQRSF	KNDPNGLPKGFCHAVQRSFI	NDPNGLPKGFCHAVQRSFID	DPNGLPKGFCHAVQRSFIDY	PNGLPKGFCHAVQRSFIDYK	NGLPKGFCHAVQRSFIDYKN	GLPKGFCHAVQRSFIDYKNM	LPKGFCHAVQRSFIDYKNMI	PKGFCHAVQRSFIDYKNMIL	KGFCHAVQRSFIDYKNMILG	GFCHAVQRSFIDYKNMILGT	FCHAVQRSFIDYKNMILGTS	CHAVQRSFIDYKNMILGTSV	HAVQRSFIDYKNMILGTSVN	AVQRSFIDYKNMILGTSVNI	VQRSFIDYKNMILGTSVNIY	QRSFIDYKNMILGTSVNIYE	RSFIDYKNMILGTSVNIYEH	SFIDYKNMILGTSVNIYEHI	FIDYKNMILGTSVNIYEHIG	IDYKNMILGTSVNIYEHIGK	DYKNMILGTSVNIYEHIGKL	YKNMILGTSVNIYEHIGKLQ	KNMILGTSVNIYEHIGKLQE	NMILGTSVNIYEHIGKLQED	MILGTSVNIYEHIGKLQEDI	ILGTSVNIYEHIGKLQEDIK	LGTSVNIYEHIGKLQEDIKK	GTSVNIYEHIGKLQEDIKKI	TSVNIYEHIGKLQEDIKKII
43	YPYDVPDYAG	IEKGTPQQKDKIGGVGSSTE	EKGTPQQKDKIGGVGSSTEN	KGTPQQKDKIGGVGSSTENV	GTPQQKDKIGGVGSSTENVN	TPQQKDKIGGVGSSTENVNA	PQQKDKIGGVGSSTENVNAW	QQKDKIGGVGSSTENVNAWW	QKDKIGGVGSSTENVNAWWK	KDKIGGVGSSTENVNAWWKG	DKIGGVGSSTENVNAWWKGI	KIGGVGSSTENVNAWWKGIE	IGGVGSSTENVNAWWKGIER	GGVGSSTENVNAWWKGIERE	GVGSSTENVNAWWKGIEREM	VGSSTENVNAWWKGIEREMW	GSSTENVNAWWKGIEREMWD	SSTENVNAWWKGIEREMWDA	STENVNAWWKGIEREMWDAV	TENVNAWWKGIEREMWDAVR	ENVNAWWKGIEREMWDAVRC	NVNAWWKGIEREMWDAVRCA	VNAWWKGIEREMWDAVRCAI	NAWWKGIEREMWDAVRCAIT	AWWKGIEREMWDAVRCAITK	WWKGIEREMWDAVRCAITKI	WKGIEREMWDAVRCAITKIN	KGIEREMWDAVRCAITKINK	GIEREMWDAVRCAITKINKK	IEREMWDAVRCAITKINKKN	EREMWDAVRCAITKINKKNN	REMWDAVRCAITKINKKNNN	EMWDAVRCAITKINKKNNNS	MWDAVRCAITKINKKNNNSI	WDAVRCAITKINKKNNNSIF	DAVRCAITKINKKNNNSIFN	AVRCAITKINKKNNNSIFNG	VRCAITKINKKNNNSIFNGD	RCAITKINKKNNNSIFNGDE	CAITKINKKNNNSIFNGDEC	AITKINKKNNNSIFNGDECG	ITKINKKNNNSIFNGDECGV	TKINKKNNNSIFNGDECGVS	KINKKNNNSIFNGDECGVSP	INKKNNNSIFNGDECGVSPP	NKKNNNSIFNGDECGVSPPT	KKNNNSIFNGDECGVSPPTG	KNNNSIFNGDECGVSPPTGN	NNNSIFNGDECGVSPPTGND
44	G	IEKGTPQQKDKIGGVGSSTE	EKGTPQQKDKIGGVGSSTEN	KGTPQQKDKIGGVGSSTENV	GTPQQKDKIGGVGSSTENVN	TPQQKDKIGGVGSSTENVNA	PQQKDKIGGVGSSTENVNAW	QQKDKIGGVGSSTENVNAWW	QKDKIGGVGSSTENVNAWWK	KDKIGGVGSSTENVNAWWKG	DKIGGVGSSTENVNAWWKGI	KIGGVGSSTENVNAWWKGIE	IGGVGSSTENVNAWWKGIER	GGVGSSTENVNAWWKGIERE	GVGSSTENVNAWWKGIEREM	VGSSTENVNAWWKGIEREMW	GSSTENVNAWWKGIEREMWD	SSTENVNAWWKGIEREMWDA	STENVNAWWKGIEREMWDAV	TENVNAWWKGIEREMWDAVR	ENVNAWWKGIEREMWDAVRC	NVNAWWKGIEREMWDAVRCA	VNAWWKGIEREMWDAVRCAI	NAWWKGIEREMWDAVRCAIT	AWWKGIEREMWDAVRCAITK	WWKGIEREMWDAVRCAITKI	WKGIEREMWDAVRCAITKIN	KGIEREMWDAVRCAITKINK	GIEREMWDAVRCAITKINKK	IEREMWDAVRCAITKINKKN	EREMWDAVRCAITKINKKNN	REMWDAVRCAITKINKKNNN	EMWDAVRCAITKINKKNNNS	MWDAVRCAITKINKKNNNSI	WDAVRCAITKINKKNNNSIF	DAVRCAITKINKKNNNSIFN	AVRCAITKINKKNNNSIFNG	VRCAITKINKKNNNSIFNGD	RCAITKINKKNNNSIFNGDE	CAITKINKKNNNSIFNGDEC	AITKINKKNNNSIFNGDECG	ITKINKKNNNSIFNGDECGV	TKINKKNNNSIFNGDECGVS	KINKKNNNSIFNGDECGVSP	INKKNNNSIFNGDECGVSPP	NKKNNNSIFNGDECGVSPPT	KKNNNSIFNGDECGVSPPTG	KNNNSIFNGDECGVSPPTGN	NNNSIFNGDECGVSPPTGND
45	YPYDVPDYAG	DEDQSVSWFKEWGEQFCIER	EDQSVSWFKEWGEQFCIERL	DQSVSWFKEWGEQFCIERLR	QSVSWFKEWGEQFCIERLRY	SVSWFKEWGEQFCIERLRYE	VSWFKEWGEQFCIERLRYEQ	SWFKEWGEQFCIERLRYEQN	WFKEWGEQFCIERLRYEQNI	FKEWGEQFCIERLRYEQNIR	KEWGEQFCIERLRYEQNIRE	EWGEQFCIERLRYEQNIREA	WGEQFCIERLRYEQNIREAC	GEQFCIERLRYEQNIREACT	EQFCIERLRYEQNIREACTI	QFCIERLRYEQNIREACTIN	FCIERLRYEQNIREACTING	CIERLRYEQNIREACTINGK	IERLRYEQNIREACTINGKN	ERLRYEQNIREACTINGKNE	RLRYEQNIREACTINGKNEK	LRYEQNIREACTINGKNEKK	RYEQNIREACTINGKNEKKC	YEQNIREACTINGKNEKKCI	EQNIREACTINGKNEKKCIN	QNIREACTINGKNEKKCINS	NIREACTINGKNEKKCINSK	IREACTINGKNEKKCINSKS	REACTINGKNEKKCINSKSG	EACTINGKNEKKCINSKSGQ	ACTINGKNEKKCINSKSGQG	CTINGKNEKKCINSKSGQGD	TINGKNEKKCINSKSGQGDK	INGKNEKKCINSKSGQGDKI	NGKNEKKCINSKSGQGDKIQ	GKNEKKCINSKSGQGDKIQG	KNEKKCINSKSGQGDKIQGA	NEKKCINSKSGQGDKIQGAC	EKKCINSKSGQGDKIQGACK	KKCINSKSGQGDKIQGACKR	KCINSKSGQGDKIQGACKRK	CINSKSGQGDKIQGACKRKC	INSKSGQGDKIQGACKRKCE	NSKSGQGDKIQGACKRKCEK	SKSGQGDKIQGACKRKCEKY	KSGQGDKIQGACKRKCEKYK	SGQGDKIQGACKRKCEKYKK	GQGDKIQGACKRKCEKYKKY	QGDKIQGACKRKCEKYKKYI
46	G	DEDQSVSWFKEWGEQFCIER	EDQSVSWFKEWGEQFCIERL	DQSVSWFKEWGEQFCIERLR	QSVSWFKEWGEQFCIERLRY	SVSWFKEWGEQFCIERLRYE	VSWFKEWGEQFCIERLRYEQ	SWFKEWGEQFCIERLRYEQN	WFKEWGEQFCIERLRYEQNI	FKEWGEQFCIERLRYEQNIR	KEWGEQFCIERLRYEQNIRE	EWGEQFCIERLRYEQNIREA	WGEQFCIERLRYEQNIREAC	GEQFCIERLRYEQNIREACT	EQFCIERLRYEQNIREACTI	QFCIERLRYEQNIREACTIN	FCIERLRYEQNIREACTING	CIERLRYEQNIREACTINGK	IERLRYEQNIREACTINGKN	ERLRYEQNIREACTINGKNE	RLRYEQNIREACTINGKNEK	LRYEQNIREACTINGKNEKK	RYEQNIREACTINGKNEKKC	YEQNIREACTINGKNEKKCI	EQNIREACTINGKNEKKCIN	QNIREACTINGKNEKKCINS	NIREACTINGKNEKKCINSK	IREACTINGKNEKKCINSKS	REACTINGKNEKKCINSKSG	EACTINGKNEKKCINSKSGQ	ACTINGKNEKKCINSKSGQG	CTINGKNEKKCINSKSGQGD	TINGKNEKKCINSKSGQGDK	INGKNEKKCINSKSGQGDKI	NGKNEKKCINSKSGQGDKIQ	GKNEKKCINSKSGQGDKIQG	KNEKKCINSKSGQGDKIQGA	NEKKCINSKSGQGDKIQGAC	EKKCINSKSGQGDKIQGACK	KKCINSKSGQGDKIQGACKR	KCINSKSGQGDKIQGACKRK	CINSKSGQGDKIQGACKRKC	INSKSGQGDKIQGACKRKCE	NSKSGQGDKIQGACKRKCEK	SKSGQGDKIQGACKRKCEKY	KSGQGDKIQGACKRKCEKYK	SGQGDKIQGACKRKCEKYKK	GQGDKIQGACKRKCEKYKKY	QGDKIQGACKRKCEKYKKYI
47	YPYDVPDYAG	ISEKKQEWDKQKTKYENKYV	SEKKQEWDKQKTKYENKYVG	EKKQEWDKQKTKYENKYVGK	KKQEWDKQKTKYENKYVGKS	KQEWDKQKTKYENKYVGKSA	QEWDKQKTKYENKYVGKSAS	EWDKQKTKYENKYVGKSASD	WDKQKTKYENKYVGKSASDL	DKQKTKYENKYVGKSASDLL	KQKTKYENKYVGKSASDLLK	QKTKYENKYVGKSASDLLKE	KTKYENKYVGKSASDLLKEN	TKYENKYVGKSASDLLKENY	KYENKYVGKSASDLLKENYP	YENKYVGKSASDLLKENYPE	ENKYVGKSASDLLKENYPEC	NKYVGKSASDLLKENYPECI	KYVGKSASDLLKENYPECIS	YVGKSASDLLKENYPECISA	VGKSASDLLKENYPECISAN	GKSASDLLKENYPECISANF	KSASDLLKENYPECISANFD	SASDLLKENYPECISANFDF	ASDLLKENYPECISANFDFI	SDLLKENYPECISANFDFIF	DLLKENYPECISANFDFIFN	LLKENYPECISANFDFIFND	LKENYPECISANFDFIFNDN	KENYPECISANFDFIFNDNI	ENYPECISANFDFIFNDNIE	NYPECISANFDFIFNDNIEY	YPECISANFDFIFNDNIEYK	PECISANFDFIFNDNIEYKT	ECISANFDFIFNDNIEYKTY	CISANFDFIFNDNIEYKTYY	ISANFDFIFNDNIEYKTYYP	SANFDFIFNDNIEYKTYYPY	ANFDFIFNDNIEYKTYYPYG	NFDFIFNDNIEYKTYYPYGD	FDFIFNDNIEYKTYYPYGDY	DFIFNDNIEYKTYYPYGDYS	FIFNDNIEYKTYYPYGDYSS	IFNDNIEYKTYYPYGDYSSI	FNDNIEYKTYYPYGDYSSIC	NDNIEYKTYYPYGDYSSICS	DNIEYKTYYPYGDYSSICSC	NIEYKTYYPYGDYSSICSCE	IEYKTYYPYGDYSSICSCEQ
48	G	ISEKKQEWDKQKTKYENKYV	SEKKQEWDKQKTKYENKYVG	EKKQEWDKQKTKYENKYVGK	KKQEWDKQKTKYENKYVGKS	KQEWDKQKTKYENKYVGKSA	QEWDKQKTKYENKYVGKSAS	EWDKQKTKYENKYVGKSASD	WDKQKTKYENKYVGKSASDL	DKQKTKYENKYVGKSASDLL	KQKTKYENKYVGKSASDLLK	QKTKYENKYVGKSASDLLKE	KTKYENKYVGKSASDLLKEN	TKYENKYVGKSASDLLKENY	KYENKYVGKSASDLLKENYP	YENKYVGKSASDLLKENYPE	ENKYVGKSASDLLKENYPEC	NKYVGKSASDLLKENYPECI	KYVGKSASDLLKENYPECIS	YVGKSASDLLKENYPECISA	VGKSASDLLKENYPECISAN	GKSASDLLKENYPECISANF	KSASDLLKENYPECISANFD	SASDLLKENYPECISANFDF	ASDLLKENYPECISANFDFI	SDLLKENYPECISANFDFIF	DLLKENYPECISANFDFIFN	LLKENYPECISANFDFIFND	LKENYPECISANFDFIFNDN	KENYPECISANFDFIFNDNI	ENYPECISANFDFIFNDNIE	NYPECISANFDFIFNDNIEY	YPECISANFDFIFNDNIEYK	PECISANFDFIFNDNIEYKT	ECISANFDFIFNDNIEYKTY	CISANFDFIFNDNIEYKTYY	ISANFDFIFNDNIEYKTYYP	SANFDFIFNDNIEYKTYYPY	ANFDFIFNDNIEYKTYYPYG	NFDFIFNDNIEYKTYYPYGD	FDFIFNDNIEYKTYYPYGDY	DFIFNDNIEYKTYYPYGDYS	FIFNDNIEYKTYYPYGDYSS	IFNDNIEYKTYYPYGDYSSI	FNDNIEYKTYYPYGDYSSIC	NDNIEYKTYYPYGDYSSICS	DNIEYKTYYPYGDYSSICSC	NIEYKTYYPYGDYSSICSCE	IEYKTYYPYGDYSSICSCEQ
49	YPYDVPDYAG	QVKYYKYNNAEKKNNKSLCY	VKYYKYNNAEKKNNKSLCYE	KYYKYNNAEKKNNKSLCYEK	YYKYNNAEKKNNKSLCYEKD	YKYNNAEKKNNKSLCYEKDN	KYNNAEKKNNKSLCYEKDND	YNNAEKKNNKSLCYEKDNDM	NNAEKKNNKSLCYEKDNDMT	NAEKKNNKSLCYEKDNDMTW	AEKKNNKSLCYEKDNDMTWS	EKKNNKSLCYEKDNDMTWSK	KKNNKSLCYEKDNDMTWSKK	KNNKSLCYEKDNDMTWSKKY	NNKSLCYEKDNDMTWSKKYI	NKSLCYEKDNDMTWSKKYIK	KSLCYEKDNDMTWSKKYIKK	SLCYEKDNDMTWSKKYIKKL	LCYEKDNDMTWSKKYIKKLE	CYEKDNDMTWSKKYIKKLEN	YEKDNDMTWSKKYIKKLENG	EKDNDMTWSKKYIKKLENGR	KDNDMTWSKKYIKKLENGRS	DNDMTWSKKYIKKLENGRSL	NDMTWSKKYIKKLENGRSLE	DMTWSKKYIKKLENGRSLEG	MTWSKKYIKKLENGRSLEGV	TWSKKYIKKLENGRSLEGVY	WSKKYIKKLENGRSLEGVYV	SKKYIKKLENGRSLEGVYVP	KKYIKKLENGRSLEGVYVPP	KYIKKLENGRSLEGVYVPPR	YIKKLENGRSLEGVYVPPRR	IKKLENGRSLEGVYVPPRRQ	KKLENGRSLEGVYVPPRRQQ	KLENGRSLEGVYVPPRRQQL	LENGRSLEGVYVPPRRQQLC	ENGRSLEGVYVPPRRQQLCL	NGRSLEGVYVPPRRQQLCLY	GRSLEGVYVPPRRQQLCLYE	RSLEGVYVPPRRQQLCLYEL	SLEGVYVPPRRQQLCLYELF	LEGVYVPPRRQQLCLYELFP	EGVYVPPRRQQLCLYELFPI	GVYVPPRRQQLCLYELFPII	VYVPPRRQQLCLYELFPIII	YVPPRRQQLCLYELFPIIIK	VPPRRQQLCLYELFPIIIKN	PPRRQQLCLYELFPIIIKNE
50	G	QVKYYKYNNAEKKNNKSLCY	VKYYKYNNAEKKNNKSLCYE	KYYKYNNAEKKNNKSLCYEK	YYKYNNAEKKNNKSLCYEKD	YKYNNAEKKNNKSLCYEKDN	KYNNAEKKNNKSLCYEKDND	YNNAEKKNNKSLCYEKDNDM	NNAEKKNNKSLCYEKDNDMT	NAEKKNNKSLCYEKDNDMTW	AEKKNNKSLCYEKDNDMTWS	EKKNNKSLCYEKDNDMTWSK	KKNNKSLCYEKDNDMTWSKK	KNNKSLCYEKDNDMTWSKKY	NNKSLCYEKDNDMTWSKKYI	NKSLCYEKDNDMTWSKKYIK	KSLCYEKDNDMTWSKKYIKK	SLCYEKDNDMTWSKKYIKKL	LCYEKDNDMTWSKKYIKKLE	CYEKDNDMTWSKKYIKKLEN	YEKDNDMTWSKKYIKKLENG	EKDNDMTWSKKYIKKLENGR	KDNDMTWSKKYIKKLENGRS	DNDMTWSKKYIKKLENGRSL	NDMTWSKKYIKKLENGRSLE	DMTWSKKYIKKLENGRSLEG	MTWSKKYIKKLENGRSLEGV	TWSKKYIKKLENGRSLEGVY	WSKKYIKKLENGRSLEGVYV	SKKYIKKLENGRSLEGVYVP	KKYIKKLENGRSLEGVYVPP	KYIKKLENGRSLEGVYVPPR	YIKKLENGRSLEGVYVPPRR	IKKLENGRSLEGVYVPPRRQ	KKLENGRSLEGVYVPPRRQQ	KLENGRSLEGVYVPPRRQQL	LENGRSLEGVYVPPRRQQLC	ENGRSLEGVYVPPRRQQLCL	NGRSLEGVYVPPRRQQLCLY	GRSLEGVYVPPRRQQLCLYE	RSLEGVYVPPRRQQLCLYEL	SLEGVYVPPRRQQLCLYELF	LEGVYVPPRRQQLCLYELFP	EGVYVPPRRQQLCLYELFPI	GVYVPPRRQQLCLYELFPII	VYVPPRRQQLCLYELFPIII	YVPPRRQQLCLYELFPIIIK	VPPRRQQLCLYELFPIIIKN	PPRRQQLCLYELFPIIIKNE
51	YPYDVPDYAG	EEGMEKAKEELLETLQIVAE	EGMEKAKEELLETLQIVAER	GMEKAKEELLETLQIVAERE	MEKAKEELLETLQIVAEREA	EKAKEELLETLQIVAEREAY	KAKEELLETLQIVAEREAYY	AKEELLETLQIVAEREAYYL	KEELLETLQIVAEREAYYLW	EELLETLQIVAEREAYYLWK	ELLETLQIVAEREAYYLWKQ	LLETLQIVAEREAYYLWKQY	LETLQIVAEREAYYLWKQYN	ETLQIVAEREAYYLWKQYNP	TLQIVAEREAYYLWKQYNPT	LQIVAEREAYYLWKQYNPTG	QIVAEREAYYLWKQYNPTGK	IVAEREAYYLWKQYNPTGKG	VAEREAYYLWKQYNPTGKGI	AEREAYYLWKQYNPTGKGID	EREAYYLWKQYNPTGKGIDD	REAYYLWKQYNPTGKGIDDA	EAYYLWKQYNPTGKGIDDAN	AYYLWKQYNPTGKGIDDANK	YYLWKQYNPTGKGIDDANKK	YLWKQYNPTGKGIDDANKKA	LWKQYNPTGKGIDDANKKAC	WKQYNPTGKGIDDANKKACC	KQYNPTGKGIDDANKKACCA	QYNPTGKGIDDANKKACCAI	YNPTGKGIDDANKKACCAIR	NPTGKGIDDANKKACCAIRG	PTGKGIDDANKKACCAIRGS	TGKGIDDANKKACCAIRGSF	GKGIDDANKKACCAIRGSFY	KGIDDANKKACCAIRGSFYD	GIDDANKKACCAIRGSFYDL	IDDANKKACCAIRGSFYDLE	DDANKKACCAIRGSFYDLED	DANKKACCAIRGSFYDLEDI	ANKKACCAIRGSFYDLEDII	NKKACCAIRGSFYDLEDIIK	KKACCAIRGSFYDLEDIIKG	KACCAIRGSFYDLEDIIKGN	ACCAIRGSFYDLEDIIKGND	CCAIRGSFYDLEDIIKGNDL	CAIRGSFYDLEDIIKGNDLV	AIRGSFYDLEDIIKGNDLVH	IRGSFYDLEDIIKGNDLVHD
52	G	EEGMEKAKEELLETLQIVAE	EGMEKAKEELLETLQIVAER	GMEKAKEELLETLQIVAERE	MEKAKEELLETLQIVAEREA	EKAKEELLETLQIVAEREAY	KAKEELLETLQIVAEREAYY	AKEELLETLQIVAEREAYYL	KEELLETLQIVAEREAYYLW	EELLETLQIVAEREAYYLWK	ELLETLQIVAEREAYYLWKQ	LLETLQIVAEREAYYLWKQY	LETLQIVAEREAYYLWKQYN	ETLQIVAEREAYYLWKQYNP	TLQIVAEREAYYLWKQYNPT	LQIVAEREAYYLWKQYNPTG	QIVAEREAYYLWKQYNPTGK	IVAEREAYYLWKQYNPTGKG	VAEREAYYLWKQYNPTGKGI	AEREAYYLWKQYNPTGKGID	EREAYYLWKQYNPTGKGIDD	REAYYLWKQYNPTGKGIDDA	EAYYLWKQYNPTGKGIDDAN	AYYLWKQYNPTGKGIDDANK	YYLWKQYNPTGKGIDDANKK	YLWKQYNPTGKGIDDANKKA	LWKQYNPTGKGIDDANKKAC	WKQYNPTGKGIDDANKKACC	KQYNPTGKGIDDANKKACCA	QYNPTGKGIDDANKKACCAI	YNPTGKGIDDANKKACCAIR	NPTGKGIDDANKKACCAIRG	PTGKGIDDANKKACCAIRGS	TGKGIDDANKKACCAIRGSF	GKGIDDANKKACCAIRGSFY	KGIDDANKKACCAIRGSFYD	GIDDANKKACCAIRGSFYDL	IDDANKKACCAIRGSFYDLE	DDANKKACCAIRGSFYDLED	DANKKACCAIRGSFYDLEDI	ANKKACCAIRGSFYDLEDII	NKKACCAIRGSFYDLEDIIK	KKACCAIRGSFYDLEDIIKG	KACCAIRGSFYDLEDIIKGN	ACCAIRGSFYDLEDIIKGND	CCAIRGSFYDLEDIIKGNDL	CAIRGSFYDLEDIIKGNDLV	AIRGSFYDLEDIIKGNDLVH	IRGSFYDLEDIIKGNDLVHD
53	YPYDVPDYAG	DEYTKYIDSKLNEIFGSSDT	EYTKYIDSKLNEIFGSSDTN	YTKYIDSKLNEIFGSSDTND	TKYIDSKLNEIFGSSDTNDI	KYIDSKLNEIFGSSDTNDID	YIDSKLNEIFGSSDTNDIDT	IDSKLNEIFGSSDTNDIDTK	DSKLNEIFGSSDTNDIDTKR	SKLNEIFGSSDTNDIDTKRA	KLNEIFGSSDTNDIDTKRAR	LNEIFGSSDTNDIDTKRART	NEIFGSSDTNDIDTKRARTD	EIFGSSDTNDIDTKRARTDW	IFGSSDTNDIDTKRARTDWW	FGSSDTNDIDTKRARTDWWE	GSSDTNDIDTKRARTDWWEN	SSDTNDIDTKRARTDWWENE	SDTNDIDTKRARTDWWENET	DTNDIDTKRARTDWWENETI	TNDIDTKRARTDWWENETIT	NDIDTKRARTDWWENETITN	DIDTKRARTDWWENETITNG	IDTKRARTDWWENETITNGT	DTKRARTDWWENETITNGTD	TKRARTDWWENETITNGTDR	KRARTDWWENETITNGTDRK	RARTDWWENETITNGTDRKT	ARTDWWENETITNGTDRKTI	RTDWWENETITNGTDRKTIR	TDWWENETITNGTDRKTIRQ	DWWENETITNGTDRKTIRQL	WWENETITNGTDRKTIRQLV	WENETITNGTDRKTIRQLVW	ENETITNGTDRKTIRQLVWD	NETITNGTDRKTIRQLVWDA	ETITNGTDRKTIRQLVWDAM	TITNGTDRKTIRQLVWDAMQ	ITNGTDRKTIRQLVWDAMQS	TNGTDRKTIRQLVWDAMQSG	NGTDRKTIRQLVWDAMQSGV	GTDRKTIRQLVWDAMQSGVR	TDRKTIRQLVWDAMQSGVRY	DRKTIRQLVWDAMQSGVRYA	RKTIRQLVWDAMQSGVRYAV	KTIRQLVWDAMQSGVRYAVE	TIRQLVWDAMQSGVRYAVEE	IRQLVWDAMQSGVRYAVEEK	RQLVWDAMQSGVRYAVEEKN
54	G	DEYTKYIDSKLNEIFGSSDT	EYTKYIDSKLNEIFGSSDTN	YTKYIDSKLNEIFGSSDTND	TKYIDSKLNEIFGSSDTNDI	KYIDSKLNEIFGSSDTNDID	YIDSKLNEIFGSSDTNDIDT	IDSKLNEIFGSSDTNDIDTK	DSKLNEIFGSSDTNDIDTKR	SKLNEIFGSSDTNDIDTKRA	KLNEIFGSSDTNDIDTKRAR	LNEIFGSSDTNDIDTKRART	NEIFGSSDTNDIDTKRARTD	EIFGSSDTNDIDTKRARTDW	IFGSSDTNDIDTKRARTDWW	FGSSDTNDIDTKRARTDWWE	GSSDTNDIDTKRARTDWWEN	SSDTNDIDTKRARTDWWENE	SDTNDIDTKRARTDWWENET	DTNDIDTKRARTDWWENETI	TNDIDTKRARTDWWENETIT	NDIDTKRARTDWWENETITN	DIDTKRARTDWWENETITNG	IDTKRARTDWWENETITNGT	DTKRARTDWWENETITNGTD	TKRARTDWWENETITNGTDR	KRARTDWWENETITNGTDRK	RARTDWWENETITNGTDRKT	ARTDWWENETITNGTDRKTI	RTDWWENETITNGTDRKTIR	TDWWENETITNGTDRKTIRQ	DWWENETITNGTDRKTIRQL	WWENETITNGTDRKTIRQLV	WENETITNGTDRKTIRQLVW	ENETITNGTDRKTIRQLVWD	NETITNGTDRKTIRQLVWDA	ETITNGTDRKTIRQLVWDAM	TITNGTDRKTIRQLVWDAMQ	ITNGTDRKTIRQLVWDAMQS	TNGTDRKTIRQLVWDAMQSG	NGTDRKTIRQLVWDAMQSGV	GTDRKTIRQLVWDAMQSGVR	TDRKTIRQLVWDAMQSGVRY	DRKTIRQLVWDAMQSGVRYA	RKTIRQLVWDAMQSGVRYAV	KTIRQLVWDAMQSGVRYAVE	TIRQLVWDAMQSGVRYAVEE	IRQLVWDAMQSGVRYAVEEK	RQLVWDAMQSGVRYAVEEKN
55	YPYDVPDYAG	NENFPLCMGVEHIGIAKPQF	ENFPLCMGVEHIGIAKPQFI	NFPLCMGVEHIGIAKPQFIR	FPLCMGVEHIGIAKPQFIRW	PLCMGVEHIGIAKPQFIRWL	LCMGVEHIGIAKPQFIRWLE	CMGVEHIGIAKPQFIRWLEE	MGVEHIGIAKPQFIRWLEEW	GVEHIGIAKPQFIRWLEEWT	VEHIGIAKPQFIRWLEEWTN	EHIGIAKPQFIRWLEEWTNE	HIGIAKPQFIRWLEEWTNEF	IGIAKPQFIRWLEEWTNEFC	GIAKPQFIRWLEEWTNEFCE	IAKPQFIRWLEEWTNEFCEK	AKPQFIRWLEEWTNEFCEKY	KPQFIRWLEEWTNEFCEKYT	PQFIRWLEEWTNEFCEKYTK	QFIRWLEEWTNEFCEKYTKY	FIRWLEEWTNEFCEKYTKYF	IRWLEEWTNEFCEKYTKYFE	RWLEEWTNEFCEKYTKYFED	WLEEWTNEFCEKYTKYFEDM	LEEWTNEFCEKYTKYFEDMK	EEWTNEFCEKYTKYFEDMKS	EWTNEFCEKYTKYFEDMKSK	WTNEFCEKYTKYFEDMKSKC	TNEFCEKYTKYFEDMKSKCD	NEFCEKYTKYFEDMKSKCDP	EFCEKYTKYFEDMKSKCDPP	FCEKYTKYFEDMKSKCDPPK	CEKYTKYFEDMKSKCDPPKR	EKYTKYFEDMKSKCDPPKRA	KYTKYFEDMKSKCDPPKRAD	YTKYFEDMKSKCDPPKRADT	TKYFEDMKSKCDPPKRADTC	KYFEDMKSKCDPPKRADTCG	YFEDMKSKCDPPKRADTCGD	FEDMKSKCDPPKRADTCGDN	EDMKSKCDPPKRADTCGDNS	DMKSKCDPPKRADTCGDNSN	MKSKCDPPKRADTCGDNSNI	KSKCDPPKRADTCGDNSNIE	SKCDPPKRADTCGDNSNIEC	KCDPPKRADTCGDNSNIECK	CDPPKRADTCGDNSNIECKK	DPPKRADTCGDNSNIECKKA	PPKRADTCGDNSNIECKKAC
56	G	NENFPLCMGVEHIGIAKPQF	ENFPLCMGVEHIGIAKPQFI	NFPLCMGVEHIGIAKPQFIR	FPLCMGVEHIGIAKPQFIRW	PLCMGVEHIGIAKPQFIRWL	LCMGVEHIGIAKPQFIRWLE	CMGVEHIGIAKPQFIRWLEE	MGVEHIGIAKPQFIRWLEEW	GVEHIGIAKPQFIRWLEEWT	VEHIGIAKPQFIRWLEEWTN	EHIGIAKPQFIRWLEEWTNE	HIGIAKPQFIRWLEEWTNEF	IGIAKPQFIRWLEEWTNEFC	GIAKPQFIRWLEEWTNEFCE	IAKPQFIRWLEEWTNEFCEK	AKPQFIRWLEEWTNEFCEKY	KPQFIRWLEEWTNEFCEKYT	PQFIRWLEEWTNEFCEKYTK	QFIRWLEEWTNEFCEKYTKY	FIRWLEEWTNEFCEKYTKYF	IRWLEEWTNEFCEKYTKYFE	RWLEEWTNEFCEKYTKYFED	WLEEWTNEFCEKYTKYFEDM	LEEWTNEFCEKYTKYFEDMK	EEWTNEFCEKYTKYFEDMKS	EWTNEFCEKYTKYFEDMKSK	WTNEFCEKYTKYFEDMKSKC	TNEFCEKYTKYFEDMKSKCD	NEFCEKYTKYFEDMKSKCDP	EFCEKYTKYFEDMKSKCDPP	FCEKYTKYFEDMKSKCDPPK	CEKYTKYFEDMKSKCDPPKR	EKYTKYFEDMKSKCDPPKRA	KYTKYFEDMKSKCDPPKRAD	YTKYFEDMKSKCDPPKRADT	TKYFEDMKSKCDPPKRADTC	KYFEDMKSKCDPPKRADTCG	YFEDMKSKCDPPKRADTCGD	FEDMKSKCDPPKRADTCGDN	EDMKSKCDPPKRADTCGDNS	DMKSKCDPPKRADTCGDNSN	MKSKCDPPKRADTCGDNSNI	KSKCDPPKRADTCGDNSNIE	SKCDPPKRADTCGDNSNIEC	KCDPPKRADTCGDNSNIECK	CDPPKRADTCGDNSNIECKK	DPPKRADTCGDNSNIECKKA	PPKRADTCGDNSNIECKKAC
57	YPYDVPDYAG	CANYTNWLNPKRIEWNGMSN	ANYTNWLNPKRIEWNGMSNY	NYTNWLNPKRIEWNGMSNYY	YTNWLNPKRIEWNGMSNYYN	TNWLNPKRIEWNGMSNYYNK	NWLNPKRIEWNGMSNYYNKI	WLNPKRIEWNGMSNYYNKIY	LNPKRIEWNGMSNYYNKIYR	NPKRIEWNGMSNYYNKIYRK	PKRIEWNGMSNYYNKIYRKS	KRIEWNGMSNYYNKIYRKSN	RIEWNGMSNYYNKIYRKSNK	IEWNGMSNYYNKIYRKSNKE	EWNGMSNYYNKIYRKSNKES	WNGMSNYYNKIYRKSNKESE	NGMSNYYNKIYRKSNKESEG	GMSNYYNKIYRKSNKESEGG	MSNYYNKIYRKSNKESEGGK	SNYYNKIYRKSNKESEGGKD	NYYNKIYRKSNKESEGGKDY	YYNKIYRKSNKESEGGKDYS	YNKIYRKSNKESEGGKDYSM	NKIYRKSNKESEGGKDYSMI	KIYRKSNKESEGGKDYSMIM	IYRKSNKESEGGKDYSMIMA	YRKSNKESEGGKDYSMIMAP	RKSNKESEGGKDYSMIMAPT	KSNKESEGGKDYSMIMAPTV	SNKESEGGKDYSMIMAPTVI	NKESEGGKDYSMIMAPTVID	KESEGGKDYSMIMAPTVIDY	ESEGGKDYSMIMAPTVIDYL	SEGGKDYSMIMAPTVIDYLN	EGGKDYSMIMAPTVIDYLNK	GGKDYSMIMAPTVIDYLNKR	GKDYSMIMAPTVIDYLNKRC	KDYSMIMAPTVIDYLNKRCH	DYSMIMAPTVIDYLNKRCHG	YSMIMAPTVIDYLNKRCHGE	SMIMAPTVIDYLNKRCHGEI	MIMAPTVIDYLNKRCHGEIN	IMAPTVIDYLNKRCHGEING	MAPTVIDYLNKRCHGEINGN	APTVIDYLNKRCHGEINGNY	PTVIDYLNKRCHGEINGNYI	TVIDYLNKRCHGEINGNYIC	VIDYLNKRCHGEINGNYICC	IDYLNKRCHGEINGNYICCS
58	G	CANYTNWLNPKRIEWNGMSN	ANYTNWLNPKRIEWNGMSNY	NYTNWLNPKRIEWNGMSNYY	YTNWLNPKRIEWNGMSNYYN	TNWLNPKRIEWNGMSNYYNK	NWLNPKRIEWNGMSNYYNKI	WLNPKRIEWNGMSNYYNKIY	LNPKRIEWNGMSNYYNKIYR	NPKRIEWNGMSNYYNKIYRK	PKRIEWNGMSNYYNKIYRKS	KRIEWNGMSNYYNKIYRKSN	RIEWNGMSNYYNKIYRKSNK	IEWNGMSNYYNKIYRKSNKE	EWNGMSNYYNKIYRKSNKES	WNGMSNYYNKIYRKSNKESE	NGMSNYYNKIYRKSNKESEG	GMSNYYNKIYRKSNKESEGG	MSNYYNKIYRKSNKESEGGK	SNYYNKIYRKSNKESEGGKD	NYYNKIYRKSNKESEGGKDY	YYNKIYRKSNKESEGGKDYS	YNKIYRKSNKESEGGKDYSM	NKIYRKSNKESEGGKDYSMI	KIYRKSNKESEGGKDYSMIM	IYRKSNKESEGGKDYSMIMA	YRKSNKESEGGKDYSMIMAP	RKSNKESEGGKDYSMIMAPT	KSNKESEGGKDYSMIMAPTV	SNKESEGGKDYSMIMAPTVI	NKESEGGKDYSMIMAPTVID	KESEGGKDYSMIMAPTVIDY	ESEGGKDYSMIMAPTVIDYL	SEGGKDYSMIMAPTVIDYLN	EGGKDYSMIMAPTVIDYLNK	GGKDYSMIMAPTVIDYLNKR	GKDYSMIMAPTVIDYLNKRC	KDYSMIMAPTVIDYLNKRCH	DYSMIMAPTVIDYLNKRCHG	YSMIMAPTVIDYLNKRCHGE	SMIMAPTVIDYLNKRCHGEI	MIMAPTVIDYLNKRCHGEIN	IMAPTVIDYLNKRCHGEING	MAPTVIDYLNKRCHGEINGN	APTVIDYLNKRCHGEINGNY	PTVIDYLNKRCHGEINGNYI	TVIDYLNKRCHGEINGNYIC	VIDYLNKRCHGEINGNYICC	IDYLNKRCHGEINGNYICCS
59	YPYDVPDYAG	SCKNIGAYNTTSGTVNKKLQ	CKNIGAYNTTSGTVNKKLQK	KNIGAYNTTSGTVNKKLQKK	NIGAYNTTSGTVNKKLQKKE	IGAYNTTSGTVNKKLQKKET	GAYNTTSGTVNKKLQKKETE	AYNTTSGTVNKKLQKKETEC	YNTTSGTVNKKLQKKETECE	NTTSGTVNKKLQKKETECEE	TTSGTVNKKLQKKETECEEE	TSGTVNKKLQKKETECEEEK	SGTVNKKLQKKETECEEEKG	GTVNKKLQKKETECEEEKGP	TVNKKLQKKETECEEEKGPL	VNKKLQKKETECEEEKGPLD	NKKLQKKETECEEEKGPLDL	KKLQKKETECEEEKGPLDLM	KLQKKETECEEEKGPLDLMN	LQKKETECEEEKGPLDLMNE	QKKETECEEEKGPLDLMNEV	KKETECEEEKGPLDLMNEVL	KETECEEEKGPLDLMNEVLN	ETECEEEKGPLDLMNEVLNK	TECEEEKGPLDLMNEVLNKM	ECEEEKGPLDLMNEVLNKMD	CEEEKGPLDLMNEVLNKMDK	EEEKGPLDLMNEVLNKMDKK	EEKGPLDLMNEVLNKMDKKY	EKGPLDLMNEVLNKMDKKYS	KGPLDLMNEVLNKMDKKYSA	GPLDLMNEVLNKMDKKYSAH	PLDLMNEVLNKMDKKYSAHK	LDLMNEVLNKMDKKYSAHKM	DLMNEVLNKMDKKYSAHKMK	LMNEVLNKMDKKYSAHKMKC	MNEVLNKMDKKYSAHKMKCT	NEVLNKMDKKYSAHKMKCTE	EVLNKMDKKYSAHKMKCTEV	VLNKMDKKYSAHKMKCTEVY	LNKMDKKYSAHKMKCTEVYL	NKMDKKYSAHKMKCTEVYLE	KMDKKYSAHKMKCTEVYLEH	MDKKYSAHKMKCTEVYLEHV	DKKYSAHKMKCTEVYLEHVE	KKYSAHKMKCTEVYLEHVEE	KYSAHKMKCTEVYLEHVEEQ	YSAHKMKCTEVYLEHVEEQL	SAHKMKCTEVYLEHVEEQLN
60	G	SCKNIGAYNTTSGTVNKKLQ	CKNIGAYNTTSGTVNKKLQK	KNIGAYNTTSGTVNKKLQKK	NIGAYNTTSGTVNKKLQKKE	IGAYNTTSGTVNKKLQKKET	GAYNTTSGTVNKKLQKKETE	AYNTTSGTVNKKLQKKETEC	YNTTSGTVNKKLQKKETECE	NTTSGTVNKKLQKKETECEE	TTSGTVNKKLQKKETECEEE	TSGTVNKKLQKKETECEEEK	SGTVNKKLQKKETECEEEKG	GTVNKKLQKKETECEEEKGP	TVNKKLQKKETECEEEKGPL	VNKKLQKKETECEEEKGPLD	NKKLQKKETECEEEKGPLDL	KKLQKKETECEEEKGPLDLM	KLQKKETECEEEKGPLDLMN	LQKKETECEEEKGPLDLMNE	QKKETECEEEKGPLDLMNEV	KKETECEEEKGPLDLMNEVL	KETECEEEKGPLDLMNEVLN	ETECEEEKGPLDLMNEVLNK	TECEEEKGPLDLMNEVLNKM	ECEEEKGPLDLMNEVLNKMD	CEEEKGPLDLMNEVLNKMDK	EEEKGPLDLMNEVLNKMDKK	EEKGPLDLMNEVLNKMDKKY	EKGPLDLMNEVLNKMDKKYS	KGPLDLMNEVLNKMDKKYSA	GPLDLMNEVLNKMDKKYSAH	PLDLMNEVLNKMDKKYSAHK	LDLMNEVLNKMDKKYSAHKM	DLMNEVLNKMDKKYSAHKMK	LMNEVLNKMDKKYSAHKMKC	MNEVLNKMDKKYSAHKMKCT	NEVLNKMDKKYSAHKMKCTE	EVLNKMDKKYSAHKMKCTEV	VLNKMDKKYSAHKMKCTEVY	LNKMDKKYSAHKMKCTEVYL	NKMDKKYSAHKMKCTEVYLE	KMDKKYSAHKMKCTEVYLEH	MDKKYSAHKMKCTEVYLEHV	DKKYSAHKMKCTEVYLEHVE	KKYSAHKMKCTEVYLEHVEE	KYSAHKMKCTEVYLEHVEEQ	YSAHKMKCTEVYLEHVEEQL	SAHKMKCTEVYLEHVEEQLN
61	YPYDVPDYAG	NEIDNAIKDYKLYPLDRCFD	EIDNAIKDYKLYPLDRCFDD	IDNAIKDYKLYPLDRCFDDQ	DNAIKDYKLYPLDRCFDDQT	NAIKDYKLYPLDRCFDDQTK	AIKDYKLYPLDRCFDDQTKM	IKDYKLYPLDRCFDDQTKMK	KDYKLYPLDRCFDDQTKMKV	DYKLYPLDRCFDDQTKMKVC	YKLYPLDRCFDDQTKMKVCD	KLYPLDRCFDDQTKMKVCDL	LYPLDRCFDDQTKMKVCDLI	YPLDRCFDDQTKMKVCDLIA	PLDRCFDDQTKMKVCDLIAD	LDRCFDDQTKMKVCDLIADA	DRCFDDQTKMKVCDLIADAI	RCFDDQTKMKVCDLIADAIG	CFDDQTKMKVCDLIADAIGC	FDDQTKMKVCDLIADAIGCK	DDQTKMKVCDLIADAIGCKD	DQTKMKVCDLIADAIGCKDK	QTKMKVCDLIADAIGCKDKT	TKMKVCDLIADAIGCKDKTK	KMKVCDLIADAIGCKDKTKL	MKVCDLIADAIGCKDKTKLD	KVCDLIADAIGCKDKTKLDE	VCDLIADAIGCKDKTKLDEL	CDLIADAIGCKDKTKLDELD	DLIADAIGCKDKTKLDELDE	LIADAIGCKDKTKLDELDEW	IADAIGCKDKTKLDELDEWN	ADAIGCKDKTKLDELDEWND	DAIGCKDKTKLDELDEWNDM	AIGCKDKTKLDELDEWNDMD	IGCKDKTKLDELDEWNDMDL	GCKDKTKLDELDEWNDMDLR	CKDKTKLDELDEWNDMDLRG	KDKTKLDELDEWNDMDLRGT	DKTKLDELDEWNDMDLRGTY	KTKLDELDEWNDMDLRGTYN	TKLDELDEWNDMDLRGTYNK	KLDELDEWNDMDLRGTYNKH	LDELDEWNDMDLRGTYNKHK	DELDEWNDMDLRGTYNKHKG	ELDEWNDMDLRGTYNKHKGV	LDEWNDMDLRGTYNKHKGVL	DEWNDMDLRGTYNKHKGVLI	EWNDMDLRGTYNKHKGVLIP
62	G	NEIDNAIKDYKLYPLDRCFD	EIDNAIKDYKLYPLDRCFDD	IDNAIKDYKLYPLDRCFDDQ	DNAIKDYKLYPLDRCFDDQT	NAIKDYKLYPLDRCFDDQTK	AIKDYKLYPLDRCFDDQTKM	IKDYKLYPLDRCFDDQTKMK	KDYKLYPLDRCFDDQTKMKV	DYKLYPLDRCFDDQTKMKVC	YKLYPLDRCFDDQTKMKVCD	KLYPLDRCFDDQTKMKVCDL	LYPLDRCFDDQTKMKVCDLI	YPLDRCFDDQTKMKVCDLIA	PLDRCFDDQTKMKVCDLIAD	LDRCFDDQTKMKVCDLIADA	DRCFDDQTKMKVCDLIADAI	RCFDDQTKMKVCDLIADAIG	CFDDQTKMKVCDLIADAIGC	FDDQTKMKVCDLIADAIGCK	DDQTKMKVCDLIADAIGCKD	DQTKMKVCDLIADAIGCKDK	QTKMKVCDLIADAIGCKDKT	TKMKVCDLIADAIGCKDKTK	KMKVCDLIADAIGCKDKTKL	MKVCDLIADAIGCKDKTKLD	KVCDLIADAIGCKDKTKLDE	VCDLIADAIGCKDKTKLDEL	CDLIADAIGCKDKTKLDELD	DLIADAIGCKDKTKLDELDE	LIADAIGCKDKTKLDELDEW	IADAIGCKDKTKLDELDEWN	ADAIGCKDKTKLDELDEWND	DAIGCKDKTKLDELDEWNDM	AIGCKDKTKLDELDEWNDMD	IGCKDKTKLDELDEWNDMDL	GCKDKTKLDELDEWNDMDLR	CKDKTKLDELDEWNDMDLRG	KDKTKLDELDEWNDMDLRGT	DKTKLDELDEWNDMDLRGTY	KTKLDELDEWNDMDLRGTYN	TKLDELDEWNDMDLRGTYNK	KLDELDEWNDMDLRGTYNKH	LDELDEWNDMDLRGTYNKHK	DELDEWNDMDLRGTYNKHKG	ELDEWNDMDLRGTYNKHKGV	LDEWNDMDLRGTYNKHKGVL	DEWNDMDLRGTYNKHKGVLI	EWNDMDLRGTYNKHKGVLIP
63	YPYDVPDYAG	PPRRRQLCFSRIVRGPANLR	PRRRQLCFSRIVRGPANLRS	RRRQLCFSRIVRGPANLRSL	RRQLCFSRIVRGPANLRSLN	RQLCFSRIVRGPANLRSLNE	QLCFSRIVRGPANLRSLNEF	LCFSRIVRGPANLRSLNEFK	CFSRIVRGPANLRSLNEFKE	FSRIVRGPANLRSLNEFKEE	SRIVRGPANLRSLNEFKEEI	RIVRGPANLRSLNEFKEEIL	IVRGPANLRSLNEFKEEILK	VRGPANLRSLNEFKEEILKG	RGPANLRSLNEFKEEILKGA	GPANLRSLNEFKEEILKGAQ	PANLRSLNEFKEEILKGAQS	ANLRSLNEFKEEILKGAQSE	NLRSLNEFKEEILKGAQSEG	LRSLNEFKEEILKGAQSEGK	RSLNEFKEEILKGAQSEGKF	SLNEFKEEILKGAQSEGKFL	LNEFKEEILKGAQSEGKFLG	NEFKEEILKGAQSEGKFLGN	EFKEEILKGAQSEGKFLGNY	FKEEILKGAQSEGKFLGNYY	KEEILKGAQSEGKFLGNYYK	EEILKGAQSEGKFLGNYYKE	EILKGAQSEGKFLGNYYKEH	ILKGAQSEGKFLGNYYKEHK	LKGAQSEGKFLGNYYKEHKD	KGAQSEGKFLGNYYKEHKDK	GAQSEGKFLGNYYKEHKDKE	AQSEGKFLGNYYKEHKDKEK	QSEGKFLGNYYKEHKDKEKA	SEGKFLGNYYKEHKDKEKAL	EGKFLGNYYKEHKDKEKALE	GKFLGNYYKEHKDKEKALEA	KFLGNYYKEHKDKEKALEAM	FLGNYYKEHKDKEKALEAMK	LGNYYKEHKDKEKALEAMKN	GNYYKEHKDKEKALEAMKNS	NYYKEHKDKEKALEAMKNSF	YYKEHKDKEKALEAMKNSFY	YKEHKDKEKALEAMKNSFYD	KEHKDKEKALEAMKNSFYDY	EHKDKEKALEAMKNSFYDYE	HKDKEKALEAMKNSFYDYED	KDKEKALEAMKNSFYDYEDI
64	G	PPRRRQLCFSRIVRGPANLR	PRRRQLCFSRIVRGPANLRS	RRRQLCFSRIVRGPANLRSL	RRQLCFSRIVRGPANLRSLN	RQLCFSRIVRGPANLRSLNE	QLCFSRIVRGPANLRSLNEF	LCFSRIVRGPANLRSLNEFK	CFSRIVRGPANLRSLNEFKE	FSRIVRGPANLRSLNEFKEE	SRIVRGPANLRSLNEFKEEI	RIVRGPANLRSLNEFKEEIL	IVRGPANLRSLNEFKEEILK	VRGPANLRSLNEFKEEILKG	RGPANLRSLNEFKEEILKGA	GPANLRSLNEFKEEILKGAQ	PANLRSLNEFKEEILKGAQS	ANLRSLNEFKEEILKGAQSE	NLRSLNEFKEEILKGAQSEG	LRSLNEFKEEILKGAQSEGK	RSLNEFKEEILKGAQSEGKF	SLNEFKEEILKGAQSEGKFL	LNEFKEEILKGAQSEGKFLG	NEFKEEILKGAQSEGKFLGN	EFKEEILKGAQSEGKFLGNY	FKEEILKGAQSEGKFLGNYY	KEEILKGAQSEGKFLGNYYK	EEILKGAQSEGKFLGNYYKE	EILKGAQSEGKFLGNYYKEH	ILKGAQSEGKFLGNYYKEHK	LKGAQSEGKFLGNYYKEHKD	KGAQSEGKFLGNYYKEHKDK	GAQSEGKFLGNYYKEHKDKE	AQSEGKFLGNYYKEHKDKEK	QSEGKFLGNYYKEHKDKEKA	SEGKFLGNYYKEHKDKEKAL	EGKFLGNYYKEHKDKEKALE	GKFLGNYYKEHKDKEKALEA	KFLGNYYKEHKDKEKALEAM	FLGNYYKEHKDKEKALEAMK	LGNYYKEHKDKEKALEAMKN	GNYYKEHKDKEKALEAMKNS	NYYKEHKDKEKALEAMKNSF	YYKEHKDKEKALEAMKNSFY	YKEHKDKEKALEAMKNSFYD	KEHKDKEKALEAMKNSFYDY	EHKDKEKALEAMKNSFYDYE	HKDKEKALEAMKNSFYDYED	KDKEKALEAMKNSFYDYEDI
65	YPYDVPDYAG	IIKGTDMLTNIEFKDIKIKL	IKGTDMLTNIEFKDIKIKLD	KGTDMLTNIEFKDIKIKLDR	GTDMLTNIEFKDIKIKLDRL	TDMLTNIEFKDIKIKLDRLL	DMLTNIEFKDIKIKLDRLLE	MLTNIEFKDIKIKLDRLLEK	LTNIEFKDIKIKLDRLLEKE	TNIEFKDIKIKLDRLLEKET	NIEFKDIKIKLDRLLEKETN	IEFKDIKIKLDRLLEKETNN	EFKDIKIKLDRLLEKETNNT	FKDIKIKLDRLLEKETNNTK	KDIKIKLDRLLEKETNNTKK	DIKIKLDRLLEKETNNTKKA	IKIKLDRLLEKETNNTKKAE	KIKLDRLLEKETNNTKKAED	IKLDRLLEKETNNTKKAEDW	KLDRLLEKETNNTKKAEDWW	LDRLLEKETNNTKKAEDWWK	DRLLEKETNNTKKAEDWWKT	RLLEKETNNTKKAEDWWKTN	LLEKETNNTKKAEDWWKTNK	LEKETNNTKKAEDWWKTNKK	EKETNNTKKAEDWWKTNKKS	KETNNTKKAEDWWKTNKKSI	ETNNTKKAEDWWKTNKKSIW	TNNTKKAEDWWKTNKKSIWN	NNTKKAEDWWKTNKKSIWNA	NTKKAEDWWKTNKKSIWNAM	TKKAEDWWKTNKKSIWNAML	KKAEDWWKTNKKSIWNAMLC	KAEDWWKTNKKSIWNAMLCG	AEDWWKTNKKSIWNAMLCGY	EDWWKTNKKSIWNAMLCGYK	DWWKTNKKSIWNAMLCGYKK	WWKTNKKSIWNAMLCGYKKS	WKTNKKSIWNAMLCGYKKSG	KTNKKSIWNAMLCGYKKSGN	TNKKSIWNAMLCGYKKSGNK	NKKSIWNAMLCGYKKSGNKI	KKSIWNAMLCGYKKSGNKII	KSIWNAMLCGYKKSGNKIID	SIWNAMLCGYKKSGNKIIDP	IWNAMLCGYKKSGNKIIDPS	WNAMLCGYKKSGNKIIDPSW	NAMLCGYKKSGNKIIDPSWC	AMLCGYKKSGNKIIDPSWCT
66	G	IIKGTDMLTNIEFKDIKIKL	IKGTDMLTNIEFKDIKIKLD	KGTDMLTNIEFKDIKIKLDR	GTDMLTNIEFKDIKIKLDRL	TDMLTNIEFKDIKIKLDRLL	DMLTNIEFKDIKIKLDRLLE	MLTNIEFKDIKIKLDRLLEK	LTNIEFKDIKIKLDRLLEKE	TNIEFKDIKIKLDRLLEKET	NIEFKDIKIKLDRLLEKETN	IEFKDIKIKLDRLLEKETNN	EFKDIKIKLDRLLEKETNNT	FKDIKIKLDRLLEKETNNTK	KDIKIKLDRLLEKETNNTKK	DIKIKLDRLLEKETNNTKKA	IKIKLDRLLEKETNNTKKAE	KIKLDRLLEKETNNTKKAED	IKLDRLLEKETNNTKKAEDW	KLDRLLEKETNNTKKAEDWW	LDRLLEKETNNTKKAEDWWK	DRLLEKETNNTKKAEDWWKT	RLLEKETNNTKKAEDWWKTN	LLEKETNNTKKAEDWWKTNK	LEKETNNTKKAEDWWKTNKK	EKETNNTKKAEDWWKTNKKS	KETNNTKKAEDWWKTNKKSI	ETNNTKKAEDWWKTNKKSIW	TNNTKKAEDWWKTNKKSIWN	NNTKKAEDWWKTNKKSIWNA	NTKKAEDWWKTNKKSIWNAM	TKKAEDWWKTNKKSIWNAML	KKAEDWWKTNKKSIWNAMLC	KAEDWWKTNKKSIWNAMLCG	AEDWWKTNKKSIWNAMLCGY	EDWWKTNKKSIWNAMLCGYK	DWWKTNKKSIWNAMLCGYKK	WWKTNKKSIWNAMLCGYKKS	WKTNKKSIWNAMLCGYKKSG	KTNKKSIWNAMLCGYKKSGN	TNKKSIWNAMLCGYKKSGNK	NKKSIWNAMLCGYKKSGNKI	KKSIWNAMLCGYKKSGNKII	KSIWNAMLCGYKKSGNKIID	SIWNAMLCGYKKSGNKIIDP	IWNAMLCGYKKSGNKIIDPS	WNAMLCGYKKSGNKIIDPSW	NAMLCGYKKSGNKIIDPSWC	AMLCGYKKSGNKIIDPSWCT
67	YPYDVPDYAG	TIPTTETPPQFLRWIKEWGT	IPTTETPPQFLRWIKEWGTN	PTTETPPQFLRWIKEWGTNV	TTETPPQFLRWIKEWGTNVC	TETPPQFLRWIKEWGTNVCI	ETPPQFLRWIKEWGTNVCIQ	TPPQFLRWIKEWGTNVCIQK	PPQFLRWIKEWGTNVCIQKQ	PQFLRWIKEWGTNVCIQKQE	QFLRWIKEWGTNVCIQKQEH	FLRWIKEWGTNVCIQKQEHK	LRWIKEWGTNVCIQKQEHKE	RWIKEWGTNVCIQKQEHKEY	WIKEWGTNVCIQKQEHKEYV	IKEWGTNVCIQKQEHKEYVK	KEWGTNVCIQKQEHKEYVKS	EWGTNVCIQKQEHKEYVKSK	WGTNVCIQKQEHKEYVKSKC	GTNVCIQKQEHKEYVKSKCS	TNVCIQKQEHKEYVKSKCSN	NVCIQKQEHKEYVKSKCSNV	VCIQKQEHKEYVKSKCSNVT	CIQKQEHKEYVKSKCSNVTN	IQKQEHKEYVKSKCSNVTNL	QKQEHKEYVKSKCSNVTNLG	KQEHKEYVKSKCSNVTNLGA	QEHKEYVKSKCSNVTNLGAQ	EHKEYVKSKCSNVTNLGAQA	HKEYVKSKCSNVTNLGAQAS	KEYVKSKCSNVTNLGAQASE	EYVKSKCSNVTNLGAQASES	YVKSKCSNVTNLGAQASESN	VKSKCSNVTNLGAQASESNN	KSKCSNVTNLGAQASESNNC	SKCSNVTNLGAQASESNNCT	KCSNVTNLGAQASESNNCTS	CSNVTNLGAQASESNNCTSE	SNVTNLGAQASESNNCTSEI	NVTNLGAQASESNNCTSEIK	VTNLGAQASESNNCTSEIKK	TNLGAQASESNNCTSEIKKY	NLGAQASESNNCTSEIKKYQ	LGAQASESNNCTSEIKKYQE	GAQASESNNCTSEIKKYQEW	AQASESNNCTSEIKKYQEWS	QASESNNCTSEIKKYQEWSR	ASESNNCTSEIKKYQEWSRK	SESNNCTSEIKKYQEWSRKR
68	G	TIPTTETPPQFLRWIKEWGT	IPTTETPPQFLRWIKEWGTN	PTTETPPQFLRWIKEWGTNV	TTETPPQFLRWIKEWGTNVC	TETPPQFLRWIKEWGTNVCI	ETPPQFLRWIKEWGTNVCIQ	TPPQFLRWIKEWGTNVCIQK	PPQFLRWIKEWGTNVCIQKQ	PQFLRWIKEWGTNVCIQKQE	QFLRWIKEWGTNVCIQKQEH	FLRWIKEWGTNVCIQKQEHK	LRWIKEWGTNVCIQKQEHKE	RWIKEWGTNVCIQKQEHKEY	WIKEWGTNVCIQKQEHKEYV	IKEWGTNVCIQKQEHKEYVK	KEWGTNVCIQKQEHKEYVKS	EWGTNVCIQKQEHKEYVKSK	WGTNVCIQKQEHKEYVKSKC	GTNVCIQKQEHKEYVKSKCS	TNVCIQKQEHKEYVKSKCSN	NVCIQKQEHKEYVKSKCSNV	VCIQKQEHKEYVKSKCSNVT	CIQKQEHKEYVKSKCSNVTN	IQKQEHKEYVKSKCSNVTNL	QKQEHKEYVKSKCSNVTNLG	KQEHKEYVKSKCSNVTNLGA	QEHKEYVKSKCSNVTNLGAQ	EHKEYVKSKCSNVTNLGAQA	HKEYVKSKCSNVTNLGAQAS	KEYVKSKCSNVTNLGAQASE	EYVKSKCSNVTNLGAQASES	YVKSKCSNVTNLGAQASESN	VKSKCSNVTNLGAQASESNN	KSKCSNVTNLGAQASESNNC	SKCSNVTNLGAQASESNNCT	KCSNVTNLGAQASESNNCTS	CSNVTNLGAQASESNNCTSE	SNVTNLGAQASESNNCTSEI	NVTNLGAQASESNNCTSEIK	VTNLGAQASESNNCTSEIKK	TNLGAQASESNNCTSEIKKY	NLGAQASESNNCTSEIKKYQ	LGAQASESNNCTSEIKKYQE	GAQASESNNCTSEIKKYQEW	AQASESNNCTSEIKKYQEWS	QASESNNCTSEIKKYQEWSR	ASESNNCTSEIKKYQEWSRK	SESNNCTSEIKKYQEWSRKR
69	YPYDVPDYAG	RSIRWETISKRYKKYKRMDI	SIRWETISKRYKKYKRMDIL	IRWETISKRYKKYKRMDILK	RWETISKRYKKYKRMDILKD	WETISKRYKKYKRMDILKDV	ETISKRYKKYKRMDILKDVK	TISKRYKKYKRMDILKDVKE	ISKRYKKYKRMDILKDVKEP	SKRYKKYKRMDILKDVKEPD	KRYKKYKRMDILKDVKEPDA	RYKKYKRMDILKDVKEPDAN	YKKYKRMDILKDVKEPDANT	KKYKRMDILKDVKEPDANTY	KYKRMDILKDVKEPDANTYL	YKRMDILKDVKEPDANTYLR	KRMDILKDVKEPDANTYLRE	RMDILKDVKEPDANTYLREH	MDILKDVKEPDANTYLREHC	DILKDVKEPDANTYLREHCS	ILKDVKEPDANTYLREHCSK	LKDVKEPDANTYLREHCSKC	KDVKEPDANTYLREHCSKCP	DVKEPDANTYLREHCSKCPC	VKEPDANTYLREHCSKCPCG	KEPDANTYLREHCSKCPCGF	EPDANTYLREHCSKCPCGFN	PDANTYLREHCSKCPCGFND	DANTYLREHCSKCPCGFNDM	ANTYLREHCSKCPCGFNDME	NTYLREHCSKCPCGFNDMEE	TYLREHCSKCPCGFNDMEEM	YLREHCSKCPCGFNDMEEMN	LREHCSKCPCGFNDMEEMNN	REHCSKCPCGFNDMEEMNNN	EHCSKCPCGFNDMEEMNNNE	HCSKCPCGFNDMEEMNNNED	CSKCPCGFNDMEEMNNNEDN	SKCPCGFNDMEEMNNNEDNE	KCPCGFNDMEEMNNNEDNEK	CPCGFNDMEEMNNNEDNEKE	PCGFNDMEEMNNNEDNEKEA	CGFNDMEEMNNNEDNEKEAF	GFNDMEEMNNNEDNEKEAFK	FNDMEEMNNNEDNEKEAFKQ	NDMEEMNNNEDNEKEAFKQI	DMEEMNNNEDNEKEAFKQIK	MEEMNNNEDNEKEAFKQIKE	EEMNNNEDNEKEAFKQIKEQ
70	G	RSIRWETISKRYKKYKRMDI	SIRWETISKRYKKYKRMDIL	IRWETISKRYKKYKRMDILK	RWETISKRYKKYKRMDILKD	WETISKRYKKYKRMDILKDV	ETISKRYKKYKRMDILKDVK	TISKRYKKYKRMDILKDVKE	ISKRYKKYKRMDILKDVKEP	SKRYKKYKRMDILKDVKEPD	KRYKKYKRMDILKDVKEPDA	RYKKYKRMDILKDVKEPDAN	YKKYKRMDILKDVKEPDANT	KKYKRMDILKDVKEPDANTY	KYKRMDILKDVKEPDANTYL	YKRMDILKDVKEPDANTYLR	KRMDILKDVKEPDANTYLRE	RMDILKDVKEPDANTYLREH	MDILKDVKEPDANTYLREHC	DILKDVKEPDANTYLREHCS	ILKDVKEPDANTYLREHCSK	LKDVKEPDANTYLREHCSKC	KDVKEPDANTYLREHCSKCP	DVKEPDANTYLREHCSKCPC	VKEPDANTYLREHCSKCPCG	KEPDANTYLREHCSKCPCGF	EPDANTYLREHCSKCPCGFN	PDANTYLREHCSKCPCGFND	DANTYLREHCSKCPCGFNDM	ANTYLREHCSKCPCGFNDME	NTYLREHCSKCPCGFNDMEE	TYLREHCSKCPCGFNDMEEM	YLREHCSKCPCGFNDMEEMN	LREHCSKCPCGFNDMEEMNN	REHCSKCPCGFNDMEEMNNN	EHCSKCPCGFNDMEEMNNNE	HCSKCPCGFNDMEEMNNNED	CSKCPCGFNDMEEMNNNEDN	SKCPCGFNDMEEMNNNEDNE	KCPCGFNDMEEMNNNEDNEK	CPCGFNDMEEMNNNEDNEKE	PCGFNDMEEMNNNEDNEKEA	CGFNDMEEMNNNEDNEKEAF	GFNDMEEMNNNEDNEKEAFK	FNDMEEMNNNEDNEKEAFKQ	NDMEEMNNNEDNEKEAFKQI	DMEEMNNNEDNEKEAFKQIK	MEEMNNNEDNEKEAFKQIKE	EEMNNNEDNEKEAFKQIKEQ
71	YPYDVPDYAG	QVKIPAELEDVIYRIKHHEY	VKIPAELEDVIYRIKHHEYD	KIPAELEDVIYRIKHHEYDK	IPAELEDVIYRIKHHEYDKG	PAELEDVIYRIKHHEYDKGN	AELEDVIYRIKHHEYDKGND	ELEDVIYRIKHHEYDKGNDY	LEDVIYRIKHHEYDKGNDYI	EDVIYRIKHHEYDKGNDYIC	DVIYRIKHHEYDKGNDYICN	VIYRIKHHEYDKGNDYICNK	IYRIKHHEYDKGNDYICNKY	YRIKHHEYDKGNDYICNKYK	RIKHHEYDKGNDYICNKYKN	IKHHEYDKGNDYICNKYKNI	KHHEYDKGNDYICNKYKNIH	HHEYDKGNDYICNKYKNIHD	HEYDKGNDYICNKYKNIHDR	EYDKGNDYICNKYKNIHDRM	YDKGNDYICNKYKNIHDRMK	DKGNDYICNKYKNIHDRMKK	KGNDYICNKYKNIHDRMKKN	GNDYICNKYKNIHDRMKKNN	NDYICNKYKNIHDRMKKNNG	DYICNKYKNIHDRMKKNNGN	YICNKYKNIHDRMKKNNGNF	ICNKYKNIHDRMKKNNGNFV	CNKYKNIHDRMKKNNGNFVT	NKYKNIHDRMKKNNGNFVTD	KYKNIHDRMKKNNGNFVTDN	YKNIHDRMKKNNGNFVTDNF	KNIHDRMKKNNGNFVTDNFV	NIHDRMKKNNGNFVTDNFVK	IHDRMKKNNGNFVTDNFVKK	HDRMKKNNGNFVTDNFVKKS	DRMKKNNGNFVTDNFVKKSW	RMKKNNGNFVTDNFVKKSWE	MKKNNGNFVTDNFVKKSWEI	KKNNGNFVTDNFVKKSWEIS	KNNGNFVTDNFVKKSWEISN	NNGNFVTDNFVKKSWEISNG	NGNFVTDNFVKKSWEISNGV	GNFVTDNFVKKSWEISNGVL	NFVTDNFVKKSWEISNGVLI	FVTDNFVKKSWEISNGVLIP	VTDNFVKKSWEISNGVLIPP	TDNFVKKSWEISNGVLIPPR	DNFVKKSWEISNGVLIPPRR
72	G	QVKIPAELEDVIYRIKHHEY	VKIPAELEDVIYRIKHHEYD	KIPAELEDVIYRIKHHEYDK	IPAELEDVIYRIKHHEYDKG	PAELEDVIYRIKHHEYDKGN	AELEDVIYRIKHHEYDKGND	ELEDVIYRIKHHEYDKGNDY	LEDVIYRIKHHEYDKGNDYI	EDVIYRIKHHEYDKGNDYIC	DVIYRIKHHEYDKGNDYICN	VIYRIKHHEYDKGNDYICNK	IYRIKHHEYDKGNDYICNKY	YRIKHHEYDKGNDYICNKYK	RIKHHEYDKGNDYICNKYKN	IKHHEYDKGNDYICNKYKNI	KHHEYDKGNDYICNKYKNIH	HHEYDKGNDYICNKYKNIHD	HEYDKGNDYICNKYKNIHDR	EYDKGNDYICNKYKNIHDRM	YDKGNDYICNKYKNIHDRMK	DKGNDYICNKYKNIHDRMKK	KGNDYICNKYKNIHDRMKKN	GNDYICNKYKNIHDRMKKNN	NDYICNKYKNIHDRMKKNNG	DYICNKYKNIHDRMKKNNGN	YICNKYKNIHDRMKKNNGNF	ICNKYKNIHDRMKKNNGNFV	CNKYKNIHDRMKKNNGNFVT	NKYKNIHDRMKKNNGNFVTD	KYKNIHDRMKKNNGNFVTDN	YKNIHDRMKKNNGNFVTDNF	KNIHDRMKKNNGNFVTDNFV	NIHDRMKKNNGNFVTDNFVK	IHDRMKKNNGNFVTDNFVKK	HDRMKKNNGNFVTDNFVKKS	DRMKKNNGNFVTDNFVKKSW	RMKKNNGNFVTDNFVKKSWE	MKKNNGNFVTDNFVKKSWEI	KKNNGNFVTDNFVKKSWEIS	KNNGNFVTDNFVKKSWEISN	NNGNFVTDNFVKKSWEISNG	NGNFVTDNFVKKSWEISNGV	GNFVTDNFVKKSWEISNGVL	NFVTDNFVKKSWEISNGVLI	FVTDNFVKKSWEISNGVLIP	VTDNFVKKSWEISNGVLIPP	TDNFVKKSWEISNGVLIPPR	DNFVKKSWEISNGVLIPPRR
73	YPYDVPDYAG	RKNLFLYIDPSKICEYKKDP	KNLFLYIDPSKICEYKKDPK	NLFLYIDPSKICEYKKDPKL	LFLYIDPSKICEYKKDPKLF	FLYIDPSKICEYKKDPKLFK	LYIDPSKICEYKKDPKLFKD	YIDPSKICEYKKDPKLFKDF	IDPSKICEYKKDPKLFKDFI	DPSKICEYKKDPKLFKDFIY	PSKICEYKKDPKLFKDFIYW	SKICEYKKDPKLFKDFIYWS	KICEYKKDPKLFKDFIYWSA	ICEYKKDPKLFKDFIYWSAF	CEYKKDPKLFKDFIYWSAFT	EYKKDPKLFKDFIYWSAFTE	YKKDPKLFKDFIYWSAFTEV	KKDPKLFKDFIYWSAFTEVE	KDPKLFKDFIYWSAFTEVER	DPKLFKDFIYWSAFTEVERL	PKLFKDFIYWSAFTEVERLK	KLFKDFIYWSAFTEVERLKK	LFKDFIYWSAFTEVERLKKA	FKDFIYWSAFTEVERLKKAY	KDFIYWSAFTEVERLKKAYG	DFIYWSAFTEVERLKKAYGG	FIYWSAFTEVERLKKAYGGA	IYWSAFTEVERLKKAYGGAR	YWSAFTEVERLKKAYGGARA	WSAFTEVERLKKAYGGARAK	SAFTEVERLKKAYGGARAKV	AFTEVERLKKAYGGARAKVV	FTEVERLKKAYGGARAKVVH	TEVERLKKAYGGARAKVVHA	EVERLKKAYGGARAKVVHAM	VERLKKAYGGARAKVVHAMK	ERLKKAYGGARAKVVHAMKY	RLKKAYGGARAKVVHAMKYS	LKKAYGGARAKVVHAMKYSF	KKAYGGARAKVVHAMKYSFT	KAYGGARAKVVHAMKYSFTD	AYGGARAKVVHAMKYSFTDI	YGGARAKVVHAMKYSFTDIG	GGARAKVVHAMKYSFTDIGS	GARAKVVHAMKYSFTDIGSI	ARAKVVHAMKYSFTDIGSII	RAKVVHAMKYSFTDIGSIIK	AKVVHAMKYSFTDIGSIIKG	KVVHAMKYSFTDIGSIIKGD
74	G	RKNLFLYIDPSKICEYKKDP	KNLFLYIDPSKICEYKKDPK	NLFLYIDPSKICEYKKDPKL	LFLYIDPSKICEYKKDPKLF	FLYIDPSKICEYKKDPKLFK	LYIDPSKICEYKKDPKLFKD	YIDPSKICEYKKDPKLFKDF	IDPSKICEYKKDPKLFKDFI	DPSKICEYKKDPKLFKDFIY	PSKICEYKKDPKLFKDFIYW	SKICEYKKDPKLFKDFIYWS	KICEYKKDPKLFKDFIYWSA	ICEYKKDPKLFKDFIYWSAF	CEYKKDPKLFKDFIYWSAFT	EYKKDPKLFKDFIYWSAFTE	YKKDPKLFKDFIYWSAFTEV	KKDPKLFKDFIYWSAFTEVE	KDPKLFKDFIYWSAFTEVER	DPKLFKDFIYWSAFTEVERL	PKLFKDFIYWSAFTEVERLK	KLFKDFIYWSAFTEVERLKK	LFKDFIYWSAFTEVERLKKA	FKDFIYWSAFTEVERLKKAY	KDFIYWSAFTEVERLKKAYG	DFIYWSAFTEVERLKKAYGG	FIYWSAFTEVERLKKAYGGA	IYWSAFTEVERLKKAYGGAR	YWSAFTEVERLKKAYGGARA	WSAFTEVERLKKAYGGARAK	SAFTEVERLKKAYGGARAKV	AFTEVERLKKAYGGARAKVV	FTEVERLKKAYGGARAKVVH	TEVERLKKAYGGARAKVVHA	EVERLKKAYGGARAKVVHAM	VERLKKAYGGARAKVVHAMK	ERLKKAYGGARAKVVHAMKY	RLKKAYGGARAKVVHAMKYS	LKKAYGGARAKVVHAMKYSF	KKAYGGARAKVVHAMKYSFT	KAYGGARAKVVHAMKYSFTD	AYGGARAKVVHAMKYSFTDI	YGGARAKVVHAMKYSFTDIG	GGARAKVVHAMKYSFTDIGS	GARAKVVHAMKYSFTDIGSI	ARAKVVHAMKYSFTDIGSII	RAKVVHAMKYSFTDIGSIIK	AKVVHAMKYSFTDIGSIIKG	KVVHAMKYSFTDIGSIIKGD
75	YPYDVPDYAG	DDMMEKNSSDKIGKILGDTD	DMMEKNSSDKIGKILGDTDG	MMEKNSSDKIGKILGDTDGQ	MEKNSSDKIGKILGDTDGQN	EKNSSDKIGKILGDTDGQNE	KNSSDKIGKILGDTDGQNEK	NSSDKIGKILGDTDGQNEKR	SSDKIGKILGDTDGQNEKRK	SDKIGKILGDTDGQNEKRKK	DKIGKILGDTDGQNEKRKKW	KIGKILGDTDGQNEKRKKWW	IGKILGDTDGQNEKRKKWWD	GKILGDTDGQNEKRKKWWDM	KILGDTDGQNEKRKKWWDMN	ILGDTDGQNEKRKKWWDMNK	LGDTDGQNEKRKKWWDMNKY	GDTDGQNEKRKKWWDMNKYH	DTDGQNEKRKKWWDMNKYHI	TDGQNEKRKKWWDMNKYHIW	DGQNEKRKKWWDMNKYHIWE	GQNEKRKKWWDMNKYHIWES	QNEKRKKWWDMNKYHIWESM	NEKRKKWWDMNKYHIWESML	EKRKKWWDMNKYHIWESMLC	KRKKWWDMNKYHIWESMLCG	RKKWWDMNKYHIWESMLCGY	KKWWDMNKYHIWESMLCGYR	KWWDMNKYHIWESMLCGYRE	WWDMNKYHIWESMLCGYREA	WDMNKYHIWESMLCGYREAE	DMNKYHIWESMLCGYREAEG	MNKYHIWESMLCGYREAEGD	NKYHIWESMLCGYREAEGDT	KYHIWESMLCGYREAEGDTE	YHIWESMLCGYREAEGDTET	HIWESMLCGYREAEGDTETN	IWESMLCGYREAEGDTETNE	WESMLCGYREAEGDTETNEN	ESMLCGYREAEGDTETNENC	SMLCGYREAEGDTETNENCR	MLCGYREAEGDTETNENCRF	LCGYREAEGDTETNENCRFP	CGYREAEGDTETNENCRFPD	GYREAEGDTETNENCRFPDI	YREAEGDTETNENCRFPDIE	REAEGDTETNENCRFPDIES	EAEGDTETNENCRFPDIESV	AEGDTETNENCRFPDIESVP
76	G	DDMMEKNSSDKIGKILGDTD	DMMEKNSSDKIGKILGDTDG	MMEKNSSDKIGKILGDTDGQ	MEKNSSDKIGKILGDTDGQN	EKNSSDKIGKILGDTDGQNE	KNSSDKIGKILGDTDGQNEK	NSSDKIGKILGDTDGQNEKR	SSDKIGKILGDTDGQNEKRK	SDKIGKILGDTDGQNEKRKK	DKIGKILGDTDGQNEKRKKW	KIGKILGDTDGQNEKRKKWW	IGKILGDTDGQNEKRKKWWD	GKILGDTDGQNEKRKKWWDM	KILGDTDGQNEKRKKWWDMN	ILGDTDGQNEKRKKWWDMNK	LGDTDGQNEKRKKWWDMNKY	GDTDGQNEKRKKWWDMNKYH	DTDGQNEKRKKWWDMNKYHI	TDGQNEKRKKWWDMNKYHIW	DGQNEKRKKWWDMNKYHIWE	GQNEKRKKWWDMNKYHIWES	QNEKRKKWWDMNKYHIWESM	NEKRKKWWDMNKYHIWESML	EKRKKWWDMNKYHIWESMLC	KRKKWWDMNKYHIWESMLCG	RKKWWDMNKYHIWESMLCGY	KKWWDMNKYHIWESMLCGYR	KWWDMNKYHIWESMLCGYRE	WWDMNKYHIWESMLCGYREA	WDMNKYHIWESMLCGYREAE	DMNKYHIWESMLCGYREAEG	MNKYHIWESMLCGYREAEGD	NKYHIWESMLCGYREAEGDT	KYHIWESMLCGYREAEGDTE	YHIWESMLCGYREAEGDTET	HIWESMLCGYREAEGDTETN	IWESMLCGYREAEGDTETNE	WESMLCGYREAEGDTETNEN	ESMLCGYREAEGDTETNENC	SMLCGYREAEGDTETNENCR	MLCGYREAEGDTETNENCRF	LCGYREAEGDTETNENCRFP	CGYREAEGDTETNENCRFPD	GYREAEGDTETNENCRFPDI	YREAEGDTETNENCRFPDIE	REAEGDTETNENCRFPDIES	EAEGDTETNENCRFPDIESV	AEGDTETNENCRFPDIESVP
77	YPYDVPDYAG	PQFLRWFQEWSENFCDRRQK	QFLRWFQEWSENFCDRRQKL	FLRWFQEWSENFCDRRQKLY	LRWFQEWSENFCDRRQKLYD	RWFQEWSENFCDRRQKLYDK	WFQEWSENFCDRRQKLYDKL	FQEWSENFCDRRQKLYDKLN	QEWSENFCDRRQKLYDKLNS	EWSENFCDRRQKLYDKLNSE	WSENFCDRRQKLYDKLNSEC	SENFCDRRQKLYDKLNSECI	ENFCDRRQKLYDKLNSECIS	NFCDRRQKLYDKLNSECISA	FCDRRQKLYDKLNSECISAE	CDRRQKLYDKLNSECISAEC	DRRQKLYDKLNSECISAECT	RRQKLYDKLNSECISAECTN	RQKLYDKLNSECISAECTNG	QKLYDKLNSECISAECTNGS	KLYDKLNSECISAECTNGSV	LYDKLNSECISAECTNGSVD	YDKLNSECISAECTNGSVDN	DKLNSECISAECTNGSVDNS	KLNSECISAECTNGSVDNSK	LNSECISAECTNGSVDNSKC	NSECISAECTNGSVDNSKCT	SECISAECTNGSVDNSKCTH	ECISAECTNGSVDNSKCTHA	CISAECTNGSVDNSKCTHAC	ISAECTNGSVDNSKCTHACV	SAECTNGSVDNSKCTHACVN	AECTNGSVDNSKCTHACVNY	ECTNGSVDNSKCTHACVNYK	CTNGSVDNSKCTHACVNYKN	TNGSVDNSKCTHACVNYKNY	NGSVDNSKCTHACVNYKNYI	GSVDNSKCTHACVNYKNYIL	SVDNSKCTHACVNYKNYILT	VDNSKCTHACVNYKNYILTK	DNSKCTHACVNYKNYILTKK	NSKCTHACVNYKNYILTKKT	SKCTHACVNYKNYILTKKTE	KCTHACVNYKNYILTKKTEY	CTHACVNYKNYILTKKTEYE	THACVNYKNYILTKKTEYEI	HACVNYKNYILTKKTEYEIQ	ACVNYKNYILTKKTEYEIQT	CVNYKNYILTKKTEYEIQTN
78	G	PQFLRWFQEWSENFCDRRQK	QFLRWFQEWSENFCDRRQKL	FLRWFQEWSENFCDRRQKLY	LRWFQEWSENFCDRRQKLYD	RWFQEWSENFCDRRQKLYDK	WFQEWSENFCDRRQKLYDKL	FQEWSENFCDRRQKLYDKLN	QEWSENFCDRRQKLYDKLNS	EWSENFCDRRQKLYDKLNSE	WSENFCDRRQKLYDKLNSEC	SENFCDRRQKLYDKLNSECI	ENFCDRRQKLYDKLNSECIS	NFCDRRQKLYDKLNSECISA	FCDRRQKLYDKLNSECISAE	CDRRQKLYDKLNSECISAEC	DRRQKLYDKLNSECISAECT	RRQKLYDKLNSECISAECTN	RQKLYDKLNSECISAECTNG	QKLYDKLNSECISAECTNGS	KLYDKLNSECISAECTNGSV	LYDKLNSECISAECTNGSVD	YDKLNSECISAECTNGSVDN	DKLNSECISAECTNGSVDNS	KLNSECISAECTNGSVDNSK	LNSECISAECTNGSVDNSKC	NSECISAECTNGSVDNSKCT	SECISAECTNGSVDNSKCTH	ECISAECTNGSVDNSKCTHA	CISAECTNGSVDNSKCTHAC	ISAECTNGSVDNSKCTHACV	SAECTNGSVDNSKCTHACVN	AECTNGSVDNSKCTHACVNY	ECTNGSVDNSKCTHACVNYK	CTNGSVDNSKCTHACVNYKN	TNGSVDNSKCTHACVNYKNY	NGSVDNSKCTHACVNYKNYI	GSVDNSKCTHACVNYKNYIL	SVDNSKCTHACVNYKNYILT	VDNSKCTHACVNYKNYILTK	DNSKCTHACVNYKNYILTKK	NSKCTHACVNYKNYILTKKT	SKCTHACVNYKNYILTKKTE	KCTHACVNYKNYILTKKTEY	CTHACVNYKNYILTKKTEYE	THACVNYKNYILTKKTEYEI	HACVNYKNYILTKKTEYEIQ	ACVNYKNYILTKKTEYEIQT	CVNYKNYILTKKTEYEIQTN
79	YPYDVPDYAG	NKYDNEFKNKNSNDKDAPDY	KYDNEFKNKNSNDKDAPDYL	YDNEFKNKNSNDKDAPDYLK	DNEFKNKNSNDKDAPDYLKE	NEFKNKNSNDKDAPDYLKEK	EFKNKNSNDKDAPDYLKEKC	FKNKNSNDKDAPDYLKEKCN	KNKNSNDKDAPDYLKEKCND	NKNSNDKDAPDYLKEKCNDN	KNSNDKDAPDYLKEKCNDNK	NSNDKDAPDYLKEKCNDNKC	SNDKDAPDYLKEKCNDNKCE	NDKDAPDYLKEKCNDNKCEC	DKDAPDYLKEKCNDNKCECL	KDAPDYLKEKCNDNKCECLN	DAPDYLKEKCNDNKCECLNK	APDYLKEKCNDNKCECLNKH	PDYLKEKCNDNKCECLNKHI	DYLKEKCNDNKCECLNKHID	YLKEKCNDNKCECLNKHIDD	LKEKCNDNKCECLNKHIDDK	KEKCNDNKCECLNKHIDDKN	EKCNDNKCECLNKHIDDKNK	KCNDNKCECLNKHIDDKNKT	CNDNKCECLNKHIDDKNKTW	NDNKCECLNKHIDDKNKTWK	DNKCECLNKHIDDKNKTWKN	NKCECLNKHIDDKNKTWKNP	KCECLNKHIDDKNKTWKNPY	CECLNKHIDDKNKTWKNPYE	ECLNKHIDDKNKTWKNPYET	CLNKHIDDKNKTWKNPYETL	LNKHIDDKNKTWKNPYETLE	NKHIDDKNKTWKNPYETLED	KHIDDKNKTWKNPYETLEDT	HIDDKNKTWKNPYETLEDTF	IDDKNKTWKNPYETLEDTFK	DDKNKTWKNPYETLEDTFKS	DKNKTWKNPYETLEDTFKSK	KNKTWKNPYETLEDTFKSKC	NKTWKNPYETLEDTFKSKCD	KTWKNPYETLEDTFKSKCDC	TWKNPYETLEDTFKSKCDCP	WKNPYETLEDTFKSKCDCPK	KNPYETLEDTFKSKCDCPKP	NPYETLEDTFKSKCDCPKPL	PYETLEDTFKSKCDCPKPLP	YETLEDTFKSKCDCPKPLPS
80	G	NKYDNEFKNKNSNDKDAPDY	KYDNEFKNKNSNDKDAPDYL	YDNEFKNKNSNDKDAPDYLK	DNEFKNKNSNDKDAPDYLKE	NEFKNKNSNDKDAPDYLKEK	EFKNKNSNDKDAPDYLKEKC	FKNKNSNDKDAPDYLKEKCN	KNKNSNDKDAPDYLKEKCND	NKNSNDKDAPDYLKEKCNDN	KNSNDKDAPDYLKEKCNDNK	NSNDKDAPDYLKEKCNDNKC	SNDKDAPDYLKEKCNDNKCE	NDKDAPDYLKEKCNDNKCEC	DKDAPDYLKEKCNDNKCECL	KDAPDYLKEKCNDNKCECLN	DAPDYLKEKCNDNKCECLNK	APDYLKEKCNDNKCECLNKH	PDYLKEKCNDNKCECLNKHI	DYLKEKCNDNKCECLNKHID	YLKEKCNDNKCECLNKHIDD	LKEKCNDNKCECLNKHIDDK	KEKCNDNKCECLNKHIDDKN	EKCNDNKCECLNKHIDDKNK	KCNDNKCECLNKHIDDKNKT	CNDNKCECLNKHIDDKNKTW	NDNKCECLNKHIDDKNKTWK	DNKCECLNKHIDDKNKTWKN	NKCECLNKHIDDKNKTWKNP	KCECLNKHIDDKNKTWKNPY	CECLNKHIDDKNKTWKNPYE	ECLNKHIDDKNKTWKNPYET	CLNKHIDDKNKTWKNPYETL	LNKHIDDKNKTWKNPYETLE	NKHIDDKNKTWKNPYETLED	KHIDDKNKTWKNPYETLEDT	HIDDKNKTWKNPYETLEDTF	IDDKNKTWKNPYETLEDTFK	DDKNKTWKNPYETLEDTFKS	DKNKTWKNPYETLEDTFKSK	KNKTWKNPYETLEDTFKSKC	NKTWKNPYETLEDTFKSKCD	KTWKNPYETLEDTFKSKCDC	TWKNPYETLEDTFKSKCDCP	WKNPYETLEDTFKSKCDCPK	KNPYETLEDTFKSKCDCPKP	NPYETLEDTFKSKCDCPKPL	PYETLEDTFKSKCDCPKPLP	YETLEDTFKSKCDCPKPLPS
81	YPYDVPDYAG	SPIKPDDLPPQADEPFDPTI	PIKPDDLPPQADEPFDPTIL	IKPDDLPPQADEPFDPTILQ	KPDDLPPQADEPFDPTILQT	PDDLPPQADEPFDPTILQTT	DDLPPQADEPFDPTILQTTI	DLPPQADEPFDPTILQTTIP	LPPQADEPFDPTILQTTIPG	PPQADEPFDPTILQTTIPGS	PQADEPFDPTILQTTIPGSG	QADEPFDPTILQTTIPGSGS	ADEPFDPTILQTTIPGSGSG	DEPFDPTILQTTIPGSGSGS	EPFDPTILQTTIPGSGSGSG
82	G	SPIKPDDLPPQADEPFDPTI	PIKPDDLPPQADEPFDPTIL	IKPDDLPPQADEPFDPTILQ	KPDDLPPQADEPFDPTILQT	PDDLPPQADEPFDPTILQTT	DDLPPQADEPFDPTILQTTI	DLPPQADEPFDPTILQTTIP	LPPQADEPFDPTILQTTIPG	PPQADEPFDPTILQTTIPGS	PQADEPFDPTILQTTIPGSG	QADEPFDPTILQTTIPGSGS	ADEPFDPTILQTTIPGSGSG	DEPFDPTILQTTIPGSGSGS	EPFDPTILQTTIPGSGSGSG
83	YPYDVPDYAG	GSGSGSGMDKSSIANKIEAY	GSGSGMDKSSIANKIEAYLG	GSGMDKSSIANKIEAYLGAK	GMDKSSIANKIEAYLGAKSD	DKSSIANKIEAYLGAKSDDS	SSIANKIEAYLGAKSDDSKI	IANKIEAYLGAKSDDSKIDQ	NKIEAYLGAKSDDSKIDQSL	IEAYLGAKSDDSKIDQSLKA	AYLGAKSDDSKIDQSLKADP	LGAKSDDSKIDQSLKADPSE	AKSDDSKIDQSLKADPSEVQ	SDDSKIDQSLKADPSEVQYY	DSKIDQSLKADPSEVQYYGS	KIDQSLKADPSEVQYYGSGG	DQSLKADPSEVQYYGSGGDG	SLKADPSEVQYYGSGGDGYY	KADPSEVQYYGSGGDGYYLR	DPSEVQYYGSGGDGYYLRKN	SEVQYYGSGGDGYYLRKNIC	VQYYGSGGDGYYLRKNICKI	YYGSGGDGYYLRKNICKITV	GSGGDGYYLRKNICKITVNH	GGDGYYLRKNICKITVNHSD	DGYYLRKNICKITVNHSDSG	YYLRKNICKITVNHSDSGTN	LRKNICKITVNHSDSGTNDP	KNICKITVNHSDSGTNDPCD	ICKITVNHSDSGTNDPCDRI	KITVNHSDSGTNDPCDRIPP	TVNHSDSGTNDPCDRIPPPY	NHSDSGTNDPCDRIPPPYGD	SDSGTNDPCDRIPPPYGDND	SGTNDPCDRIPPPYGDNDQW	TNDPCDRIPPPYGDNDQWKC	DPCDRIPPPYGDNDQWKCAI	CDRIPPPYGDNDQWKCAIIL	RIPPPYGDNDQWKCAIILSK	PPPYGDNDQWKCAIILSKVS	PYGDNDQWKCAIILSKVSEK	GDNDQWKCAIILSKVSEKPE	NDQWKCAIILSKVSEKPENV	QWKCAIILSKVSEKPENVFV	KCAIILSKVSEKPENVFVPP	AIILSKVSEKPENVFVPPRR	ILSKVSEKPENVFVPPRRQR	SKVSEKPENVFVPPRRQRMC	VSEKPENVFVPPRRQRMCIN
84	G	GSGSGSGMDKSSIANKIEAY	GSGSGMDKSSIANKIEAYLG	GSGMDKSSIANKIEAYLGAK	GMDKSSIANKIEAYLGAKSD	DKSSIANKIEAYLGAKSDDS	SSIANKIEAYLGAKSDDSKI	IANKIEAYLGAKSDDSKIDQ	NKIEAYLGAKSDDSKIDQSL	IEAYLGAKSDDSKIDQSLKA	AYLGAKSDDSKIDQSLKADP	LGAKSDDSKIDQSLKADPSE	AKSDDSKIDQSLKADPSEVQ	SDDSKIDQSLKADPSEVQYY	DSKIDQSLKADPSEVQYYGS	KIDQSLKADPSEVQYYGSGG	DQSLKADPSEVQYYGSGGDG	SLKADPSEVQYYGSGGDGYY	KADPSEVQYYGSGGDGYYLR	DPSEVQYYGSGGDGYYLRKN	SEVQYYGSGGDGYYLRKNIC	VQYYGSGGDGYYLRKNICKI	YYGSGGDGYYLRKNICKITV	GSGGDGYYLRKNICKITVNH	GGDGYYLRKNICKITVNHSD	DGYYLRKNICKITVNHSDSG	YYLRKNICKITVNHSDSGTN	LRKNICKITVNHSDSGTNDP	KNICKITVNHSDSGTNDPCD	ICKITVNHSDSGTNDPCDRI	KITVNHSDSGTNDPCDRIPP	TVNHSDSGTNDPCDRIPPPY	NHSDSGTNDPCDRIPPPYGD	SDSGTNDPCDRIPPPYGDND	SGTNDPCDRIPPPYGDNDQW	TNDPCDRIPPPYGDNDQWKC	DPCDRIPPPYGDNDQWKCAI	CDRIPPPYGDNDQWKCAIIL	RIPPPYGDNDQWKCAIILSK	PPPYGDNDQWKCAIILSKVS	PYGDNDQWKCAIILSKVSEK	GDNDQWKCAIILSKVSEKPE	NDQWKCAIILSKVSEKPENV	QWKCAIILSKVSEKPENVFV	KCAIILSKVSEKPENVFVPP	AIILSKVSEKPENVFVPPRR	ILSKVSEKPENVFVPPRRQR	SKVSEKPENVFVPPRRQRMC	VSEKPENVFVPPRRQRMCIN
85	YPYDVPDYAG	DVLLTARNEGERIVQNHPDT	LLTARNEGERIVQNHPDTNS	TARNEGERIVQNHPDTNSSN	RNEGERIVQNHPDTNSSNVC	EGERIVQNHPDTNSSNVCNA	ERIVQNHPDTNSSNVCNALE	IVQNHPDTNSSNVCNALERS	QNHPDTNSSNVCNALERSFA	HPDTNSSNVCNALERSFADI	DTNSSNVCNALERSFADIAD	NSSNVCNALERSFADIADII	SNVCNALERSFADIADIIRG	VCNALERSFADIADIIRGTD	NALERSFADIADIIRGTDLW	LERSFADIADIIRGTDLWKG	RSFADIADIIRGTDLWKGTN	FADIADIIRGTDLWKGTNSN	DIADIIRGTDLWKGTNSNLE	ADIIRGTDLWKGTNSNLEQN	IIRGTDLWKGTNSNLEQNLK	RGTDLWKGTNSNLEQNLKQM	TDLWKGTNSNLEQNLKQMFA	LWKGTNSNLEQNLKQMFAKI	KGTNSNLEQNLKQMFAKIRE	TNSNLEQNLKQMFAKIREND	SNLEQNLKQMFAKIRENDKV	LEQNLKQMFAKIRENDKVLQ	QNLKQMFAKIRENDKVLQDK	LKQMFAKIRENDKVLQDKYP	QMFAKIRENDKVLQDKYPKD	FAKIRENDKVLQDKYPKDQN	KIRENDKVLQDKYPKDQNYR	RENDKVLQDKYPKDQNYRKL	NDKVLQDKYPKDQNYRKLRE	KVLQDKYPKDQNYRKLREDW	LQDKYPKDQNYRKLREDWWN	DKYPKDQNYRKLREDWWNAN	YPKDQNYRKLREDWWNANRQ	KDQNYRKLREDWWNANRQKV	QNYRKLREDWWNANRQKVWE	YRKLREDWWNANRQKVWEVI	KLREDWWNANRQKVWEVITC	REDWWNANRQKVWEVITCGA	DWWNANRQKVWEVITCGARS	WNANRQKVWEVITCGARSND	ANRQKVWEVITCGARSNDLL	RQKVWEVITCGARSNDLLIK	KVWEVITCGARSNDLLIKRG
86	G	DVLLTARNEGERIVQNHPDT	LLTARNEGERIVQNHPDTNS	TARNEGERIVQNHPDTNSSN	RNEGERIVQNHPDTNSSNVC	EGERIVQNHPDTNSSNVCNA	ERIVQNHPDTNSSNVCNALE	IVQNHPDTNSSNVCNALERS	QNHPDTNSSNVCNALERSFA	HPDTNSSNVCNALERSFADI	DTNSSNVCNALERSFADIAD	NSSNVCNALERSFADIADII	SNVCNALERSFADIADIIRG	VCNALERSFADIADIIRGTD	NALERSFADIADIIRGTDLW	LERSFADIADIIRGTDLWKG	RSFADIADIIRGTDLWKGTN	FADIADIIRGTDLWKGTNSN	DIADIIRGTDLWKGTNSNLE	ADIIRGTDLWKGTNSNLEQN	IIRGTDLWKGTNSNLEQNLK	RGTDLWKGTNSNLEQNLKQM	TDLWKGTNSNLEQNLKQMFA	LWKGTNSNLEQNLKQMFAKI	KGTNSNLEQNLKQMFAKIRE	TNSNLEQNLKQMFAKIREND	SNLEQNLKQMFAKIRENDKV	LEQNLKQMFAKIRENDKVLQ	QNLKQMFAKIRENDKVLQDK	LKQMFAKIRENDKVLQDKYP	QMFAKIRENDKVLQDKYPKD	FAKIRENDKVLQDKYPKDQN	KIRENDKVLQDKYPKDQNYR	RENDKVLQDKYPKDQNYRKL	NDKVLQDKYPKDQNYRKLRE	KVLQDKYPKDQNYRKLREDW	LQDKYPKDQNYRKLREDWWN	DKYPKDQNYRKLREDWWNAN	YPKDQNYRKLREDWWNANRQ	KDQNYRKLREDWWNANRQKV	QNYRKLREDWWNANRQKVWE	YRKLREDWWNANRQKVWEVI	KLREDWWNANRQKVWEVITC	REDWWNANRQKVWEVITCGA	DWWNANRQKVWEVITCGARS	WNANRQKVWEVITCGARSND	ANRQKVWEVITCGARSNDLL	RQKVWEVITCGARSNDLLIK	KVWEVITCGARSNDLLIKRG
87	YPYDVPDYAG	CGHYEEKVPTKLDYVPQFLR	HYEEKVPTKLDYVPQFLRWL	EEKVPTKLDYVPQFLRWLTE	KVPTKLDYVPQFLRWLTEWI	PTKLDYVPQFLRWLTEWIED	KLDYVPQFLRWLTEWIEDFY	DYVPQFLRWLTEWIEDFYRE	VPQFLRWLTEWIEDFYREKQ	QFLRWLTEWIEDFYREKQNL	LRWLTEWIEDFYREKQNLID	WLTEWIEDFYREKQNLIDDM	TEWIEDFYREKQNLIDDMER	WIEDFYREKQNLIDDMERHR	EDFYREKQNLIDDMERHREE	FYREKQNLIDDMERHREECT	REKQNLIDDMERHREECTSE	KQNLIDDMERHREECTSEDH	NLIDDMERHREECTSEDHKS	IDDMERHREECTSEDHKSKE	DMERHREECTSEDHKSKEGT	ERHREECTSEDHKSKEGTSY	HREECTSEDHKSKEGTSYCS	EECTSEDHKSKEGTSYCSTC	CTSEDHKSKEGTSYCSTCKD	SEDHKSKEGTSYCSTCKDKC	DHKSKEGTSYCSTCKDKCKK	KSKEGTSYCSTCKDKCKKYC	KEGTSYCSTCKDKCKKYCEC	GTSYCSTCKDKCKKYCECVK	SYCSTCKDKCKKYCECVKKW	CSTCKDKCKKYCECVKKWKS	TCKDKCKKYCECVKKWKSEW	KDKCKKYCECVKKWKSEWEN	KCKKYCECVKKWKSEWENQK	KKYCECVKKWKSEWENQKNK	YCECVKKWKSEWENQKNKYT	ECVKKWKSEWENQKNKYTEL	VKKWKSEWENQKNKYTELYQ	KWKSEWENQKNKYTELYQQN	KSEWENQKNKYTELYQQNKN	EWENQKNKYTELYQQNKNET	ENQKNKYTELYQQNKNETSQ	QKNKYTELYQQNKNETSQKN	NKYTELYQQNKNETSQKNTS	YTELYQQNKNETSQKNTSRY	ELYQQNKNETSQKNTSRYDD	YQQNKNETSQKNTSRYDDYV	QNKNETSQKNTSRYDDYVKD
88	G	CGHYEEKVPTKLDYVPQFLR	HYEEKVPTKLDYVPQFLRWL	EEKVPTKLDYVPQFLRWLTE	KVPTKLDYVPQFLRWLTEWI	PTKLDYVPQFLRWLTEWIED	KLDYVPQFLRWLTEWIEDFY	DYVPQFLRWLTEWIEDFYRE	VPQFLRWLTEWIEDFYREKQ	QFLRWLTEWIEDFYREKQNL	LRWLTEWIEDFYREKQNLID	WLTEWIEDFYREKQNLIDDM	TEWIEDFYREKQNLIDDMER	WIEDFYREKQNLIDDMERHR	EDFYREKQNLIDDMERHREE	FYREKQNLIDDMERHREECT	REKQNLIDDMERHREECTSE	KQNLIDDMERHREECTSEDH	NLIDDMERHREECTSEDHKS	IDDMERHREECTSEDHKSKE	DMERHREECTSEDHKSKEGT	ERHREECTSEDHKSKEGTSY	HREECTSEDHKSKEGTSYCS	EECTSEDHKSKEGTSYCSTC	CTSEDHKSKEGTSYCSTCKD	SEDHKSKEGTSYCSTCKDKC	DHKSKEGTSYCSTCKDKCKK	KSKEGTSYCSTCKDKCKKYC	KEGTSYCSTCKDKCKKYCEC	GTSYCSTCKDKCKKYCECVK	SYCSTCKDKCKKYCECVKKW	CSTCKDKCKKYCECVKKWKS	TCKDKCKKYCECVKKWKSEW	KDKCKKYCECVKKWKSEWEN	KCKKYCECVKKWKSEWENQK	KKYCECVKKWKSEWENQKNK	YCECVKKWKSEWENQKNKYT	ECVKKWKSEWENQKNKYTEL	VKKWKSEWENQKNKYTELYQ	KWKSEWENQKNKYTELYQQN	KSEWENQKNKYTELYQQNKN	EWENQKNKYTELYQQNKNET	ENQKNKYTELYQQNKNETSQ	QKNKYTELYQQNKNETSQKN	NKYTELYQQNKNETSQKNTS	YTELYQQNKNETSQKNTSRY	ELYQQNKNETSQKNTSRYDD	YQQNKNETSQKNTSRYDDYV	QNKNETSQKNTSRYDDYVKD
89	YPYDVPDYAG	DPYFAEYATKLSFILNSSDA	YFAEYATKLSFILNSSDANN	AEYATKLSFILNSSDANNPS	YATKLSFILNSSDANNPSEK	TKLSFILNSSDANNPSEKIQ	LSFILNSSDANNPSEKIQKN	FILNSSDANNPSEKIQKNND	LNSSDANNPSEKIQKNNDEV	SSDANNPSEKIQKNNDEVCN	DANNPSEKIQKNNDEVCNCN	NNPSEKIQKNNDEVCNCNES	PSEKIQKNNDEVCNCNESGI	EKIQKNNDEVCNCNESGIAS	IQKNNDEVCNCNESGIASVE	KNNDEVCNCNESGIASVEQE	NDEVCNCNESGIASVEQEQI	EVCNCNESGIASVEQEQISD	CNCNESGIASVEQEQISDPS	CNESGIASVEQEQISDPSSN	ESGIASVEQEQISDPSSNKT	GIASVEQEQISDPSSNKTCI	ASVEQEQISDPSSNKTCITH	VEQEQISDPSSNKTCITHSS	QEQISDPSSNKTCITHSSIK	QISDPSSNKTCITHSSIKAN	SDPSSNKTCITHSSIKANKK	PSSNKTCITHSSIKANKKKV	SNKTCITHSSIKANKKKVCK	KTCITHSSIKANKKKVCKHV	CITHSSIKANKKKVCKHVKL	THSSIKANKKKVCKHVKLGV	SSIKANKKKVCKHVKLGVRE	IKANKKKVCKHVKLGVREND	ANKKKVCKHVKLGVRENDKD	KKKVCKHVKLGVRENDKDLR	KVCKHVKLGVRENDKDLRVC	CKHVKLGVRENDKDLRVCVI	HVKLGVRENDKDLRVCVIEH	KLGVRENDKDLRVCVIEHTS	GVRENDKDLRVCVIEHTSLS	RENDKDLRVCVIEHTSLSGV	NDKDLRVCVIEHTSLSGVEN	KDLRVCVIEHTSLSGVENCC	LRVCVIEHTSLSGVENCCCQ	VCVIEHTSLSGVENCCCQDF	VIEHTSLSGVENCCCQDFLR	EHTSLSGVENCCCQDFLRIL	TSLSGVENCCCQDFLRILQE
90	G	DPYFAEYATKLSFILNSSDA	YFAEYATKLSFILNSSDANN	AEYATKLSFILNSSDANNPS	YATKLSFILNSSDANNPSEK	TKLSFILNSSDANNPSEKIQ	LSFILNSSDANNPSEKIQKN	FILNSSDANNPSEKIQKNND	LNSSDANNPSEKIQKNNDEV	SSDANNPSEKIQKNNDEVCN	DANNPSEKIQKNNDEVCNCN	NNPSEKIQKNNDEVCNCNES	PSEKIQKNNDEVCNCNESGI	EKIQKNNDEVCNCNESGIAS	IQKNNDEVCNCNESGIASVE	KNNDEVCNCNESGIASVEQE	NDEVCNCNESGIASVEQEQI	EVCNCNESGIASVEQEQISD	CNCNESGIASVEQEQISDPS	CNESGIASVEQEQISDPSSN	ESGIASVEQEQISDPSSNKT	GIASVEQEQISDPSSNKTCI	ASVEQEQISDPSSNKTCITH	VEQEQISDPSSNKTCITHSS	QEQISDPSSNKTCITHSSIK	QISDPSSNKTCITHSSIKAN	SDPSSNKTCITHSSIKANKK	PSSNKTCITHSSIKANKKKV	SNKTCITHSSIKANKKKVCK	KTCITHSSIKANKKKVCKHV	CITHSSIKANKKKVCKHVKL	THSSIKANKKKVCKHVKLGV	SSIKANKKKVCKHVKLGVRE	IKANKKKVCKHVKLGVREND	ANKKKVCKHVKLGVRENDKD	KKKVCKHVKLGVRENDKDLR	KVCKHVKLGVRENDKDLRVC	CKHVKLGVRENDKDLRVCVI	HVKLGVRENDKDLRVCVIEH	KLGVRENDKDLRVCVIEHTS	GVRENDKDLRVCVIEHTSLS	RENDKDLRVCVIEHTSLSGV	NDKDLRVCVIEHTSLSGVEN	KDLRVCVIEHTSLSGVENCC	LRVCVIEHTSLSGVENCCCQ	VCVIEHTSLSGVENCCCQDF	VIEHTSLSGVENCCCQDFLR	EHTSLSGVENCCCQDFLRIL	TSLSGVENCCCQDFLRILQE
91	YPYDVPDYAG	NQEACEKNLEKVLASLTNCY	EACEKNLEKVLASLTNCYKC	CEKNLEKVLASLTNCYKCDK	KNLEKVLASLTNCYKCDKCK	LEKVLASLTNCYKCDKCKSE	KVLASLTNCYKCDKCKSEQS	LASLTNCYKCDKCKSEQSKK	SLTNCYKCDKCKSEQSKKNN	TNCYKCDKCKSEQSKKNNKN	CYKCDKCKSEQSKKNNKNWI	KCDKCKSEQSKKNNKNWIWK	DKCKSEQSKKNNKNWIWKKS	CKSEQSKKNNKNWIWKKSSG	SEQSKKNNKNWIWKKSSGKE	QSKKNNKNWIWKKSSGKEGG	KKNNKNWIWKKSSGKEGGLQ	NNKNWIWKKSSGKEGGLQKE	KNWIWKKSSGKEGGLQKEYA	WIWKKSSGKEGGLQKEYANT	WKKSSGKEGGLQKEYANTIG	KSSGKEGGLQKEYANTIGLP	SGKEGGLQKEYANTIGLPPR	KEGGLQKEYANTIGLPPRTQ	GGLQKEYANTIGLPPRTQSL	LQKEYANTIGLPPRTQSLCL	KEYANTIGLPPRTQSLCLVV	YANTIGLPPRTQSLCLVVCL	NTIGLPPRTQSLCLVVCLDE	IGLPPRTQSLCLVVCLDEKG	LPPRTQSLCLVVCLDEKGKK	PRTQSLCLVVCLDEKGKKTQ	TQSLCLVVCLDEKGKKTQEL	SLCLVVCLDEKGKKTQELKN	CLVVCLDEKGKKTQELKNIR	VVCLDEKGKKTQELKNIRTN	CLDEKGKKTQELKNIRTNSE	DEKGKKTQELKNIRTNSELL	KGKKTQELKNIRTNSELLKE	KKTQELKNIRTNSELLKEWI	TQELKNIRTNSELLKEWIIA	ELKNIRTNSELLKEWIIAAF	KNIRTNSELLKEWIIAAFHE	IRTNSELLKEWIIAAFHEGK	TNSELLKEWIIAAFHEGKNL	SELLKEWIIAAFHEGKNLKP	LLKEWIIAAFHEGKNLKPSH	KEWIIAAFHEGKNLKPSHEK	WIIAAFHEGKNLKPSHEKKN
92	G	NQEACEKNLEKVLASLTNCY	EACEKNLEKVLASLTNCYKC	CEKNLEKVLASLTNCYKCDK	KNLEKVLASLTNCYKCDKCK	LEKVLASLTNCYKCDKCKSE	KVLASLTNCYKCDKCKSEQS	LASLTNCYKCDKCKSEQSKK	SLTNCYKCDKCKSEQSKKNN	TNCYKCDKCKSEQSKKNNKN	CYKCDKCKSEQSKKNNKNWI	KCDKCKSEQSKKNNKNWIWK	DKCKSEQSKKNNKNWIWKKS	CKSEQSKKNNKNWIWKKSSG	SEQSKKNNKNWIWKKSSGKE	QSKKNNKNWIWKKSSGKEGG	KKNNKNWIWKKSSGKEGGLQ	NNKNWIWKKSSGKEGGLQKE	KNWIWKKSSGKEGGLQKEYA	WIWKKSSGKEGGLQKEYANT	WKKSSGKEGGLQKEYANTIG	KSSGKEGGLQKEYANTIGLP	SGKEGGLQKEYANTIGLPPR	KEGGLQKEYANTIGLPPRTQ	GGLQKEYANTIGLPPRTQSL	LQKEYANTIGLPPRTQSLCL	KEYANTIGLPPRTQSLCLVV	YANTIGLPPRTQSLCLVVCL	NTIGLPPRTQSLCLVVCLDE	IGLPPRTQSLCLVVCLDEKG	LPPRTQSLCLVVCLDEKGKK	PRTQSLCLVVCLDEKGKKTQ	TQSLCLVVCLDEKGKKTQEL	SLCLVVCLDEKGKKTQELKN	CLVVCLDEKGKKTQELKNIR	VVCLDEKGKKTQELKNIRTN	CLDEKGKKTQELKNIRTNSE	DEKGKKTQELKNIRTNSELL	KGKKTQELKNIRTNSELLKE	KKTQELKNIRTNSELLKEWI	TQELKNIRTNSELLKEWIIA	ELKNIRTNSELLKEWIIAAF	KNIRTNSELLKEWIIAAFHE	IRTNSELLKEWIIAAFHEGK	TNSELLKEWIIAAFHEGKNL	SELLKEWIIAAFHEGKNLKP	LLKEWIIAAFHEGKNLKPSH	KEWIIAAFHEGKNLKPSHEK	WIIAAFHEGKNLKPSHEKKN
93	YPYDVPDYAG	GDLIKGTSIWDNEYTKDLEL	LIKGTSIWDNEYTKDLELNL	KGTSIWDNEYTKDLELNLQK	TSIWDNEYTKDLELNLQKIF	IWDNEYTKDLELNLQKIFGK	DNEYTKDLELNLQKIFGKLF	EYTKDLELNLQKIFGKLFRK	TKDLELNLQKIFGKLFRKYI	DLELNLQKIFGKLFRKYIKK	ELNLQKIFGKLFRKYIKKNN	NLQKIFGKLFRKYIKKNNTA	QKIFGKLFRKYIKKNNTAEQ	IFGKLFRKYIKKNNTAEQDT	GKLFRKYIKKNNTAEQDTSY	LFRKYIKKNNTAEQDTSYSS	RKYIKKNNTAEQDTSYSSLD	YIKKNNTAEQDTSYSSLDEL	KKNNTAEQDTSYSSLDELRE	NNTAEQDTSYSSLDELRESW	TAEQDTSYSSLDELRESWWN	EQDTSYSSLDELRESWWNTN	DTSYSSLDELRESWWNTNKK	SYSSLDELRESWWNTNKKYI	SSLDELRESWWNTNKKYIWL	LDELRESWWNTNKKYIWLAM	ELRESWWNTNKKYIWLAMKH	RESWWNTNKKYIWLAMKHGA	SWWNTNKKYIWLAMKHGAGM	WNTNKKYIWLAMKHGAGMNS	TNKKYIWLAMKHGAGMNSTT	KKYIWLAMKHGAGMNSTTCC	YIWLAMKHGAGMNSTTCCGD	WLAMKHGAGMNSTTCCGDGS	AMKHGAGMNSTTCCGDGSVT	KHGAGMNSTTCCGDGSVTGS	GAGMNSTTCCGDGSVTGSGS	GMNSTTCCGDGSVTGSGSSC	NSTTCCGDGSVTGSGSSCDD	TTCCGDGSVTGSGSSCDDIP	CCGDGSVTGSGSSCDDIPTI	GDGSVTGSGSSCDDIPTIDL	GSVTGSGSSCDDIPTIDLIP	VTGSGSSCDDIPTIDLIPQY	GSGSSCDDIPTIDLIPQYLR	GSSCDDIPTIDLIPQYLRFL	SCDDIPTIDLIPQYLRFLQE	DDIPTIDLIPQYLRFLQEWV	IPTIDLIPQYLRFLQEWVEH
94	G	GDLIKGTSIWDNEYTKDLEL	LIKGTSIWDNEYTKDLELNL	KGTSIWDNEYTKDLELNLQK	TSIWDNEYTKDLELNLQKIF	IWDNEYTKDLELNLQKIFGK	DNEYTKDLELNLQKIFGKLF	EYTKDLELNLQKIFGKLFRK	TKDLELNLQKIFGKLFRKYI	DLELNLQKIFGKLFRKYIKK	ELNLQKIFGKLFRKYIKKNN	NLQKIFGKLFRKYIKKNNTA	QKIFGKLFRKYIKKNNTAEQ	IFGKLFRKYIKKNNTAEQDT	GKLFRKYIKKNNTAEQDTSY	LFRKYIKKNNTAEQDTSYSS	RKYIKKNNTAEQDTSYSSLD	YIKKNNTAEQDTSYSSLDEL	KKNNTAEQDTSYSSLDELRE	NNTAEQDTSYSSLDELRESW	TAEQDTSYSSLDELRESWWN	EQDTSYSSLDELRESWWNTN	DTSYSSLDELRESWWNTNKK	SYSSLDELRESWWNTNKKYI	SSLDELRESWWNTNKKYIWL	LDELRESWWNTNKKYIWLAM	ELRESWWNTNKKYIWLAMKH	RESWWNTNKKYIWLAMKHGA	SWWNTNKKYIWLAMKHGAGM	WNTNKKYIWLAMKHGAGMNS	TNKKYIWLAMKHGAGMNSTT	KKYIWLAMKHGAGMNSTTCC	YIWLAMKHGAGMNSTTCCGD	WLAMKHGAGMNSTTCCGDGS	AMKHGAGMNSTTCCGDGSVT	KHGAGMNSTTCCGDGSVTGS	GAGMNSTTCCGDGSVTGSGS	GMNSTTCCGDGSVTGSGSSC	NSTTCCGDGSVTGSGSSCDD	TTCCGDGSVTGSGSSCDDIP	CCGDGSVTGSGSSCDDIPTI	GDGSVTGSGSSCDDIPTIDL	GSVTGSGSSCDDIPTIDLIP	VTGSGSSCDDIPTIDLIPQY	GSGSSCDDIPTIDLIPQYLR	GSSCDDIPTIDLIPQYLRFL	SCDDIPTIDLIPQYLRFLQE	DDIPTIDLIPQYLRFLQEWV	IPTIDLIPQYLRFLQEWVEH
95	YPYDVPDYAG	CKESGGTCNGECKTECKNKC	ESGGTCNGECKTECKNKCEV	GGTCNGECKTECKNKCEVYK	TCNGECKTECKNKCEVYKKF	NGECKTECKNKCEVYKKFIE	ECKTECKNKCEVYKKFIEDC	KTECKNKCEVYKKFIEDCKG	ECKNKCEVYKKFIEDCKGGD	KNKCEVYKKFIEDCKGGDGT	KCEVYKKFIEDCKGGDGTAG	EVYKKFIEDCKGGDGTAGSS	YKKFIEDCKGGDGTAGSSWV	KFIEDCKGGDGTAGSSWVKR	IEDCKGGDGTAGSSWVKRWD	DCKGGDGTAGSSWVKRWDQI	KGGDGTAGSSWVKRWDQIYK	GDGTAGSSWVKRWDQIYKRY	GTAGSSWVKRWDQIYKRYSK	AGSSWVKRWDQIYKRYSKYI	SSWVKRWDQIYKRYSKYIED	WVKRWDQIYKRYSKYIEDAK	KRWDQIYKRYSKYIEDAKRN	WDQIYKRYSKYIEDAKRNRK	QIYKRYSKYIEDAKRNRKAG	YKRYSKYIEDAKRNRKAGTK	RYSKYIEDAKRNRKAGTKNC	SKYIEDAKRNRKAGTKNCGP	YIEDAKRNRKAGTKNCGPSS	EDAKRNRKAGTKNCGPSSTT	AKRNRKAGTKNCGPSSTTNA	RNRKAGTKNCGPSSTTNAAE	RKAGTKNCGPSSTTNAAENK	AGTKNCGPSSTTNAAENKCV	TKNCGPSSTTNAAENKCVQS	NCGPSSTTNAAENKCVQSDI	GPSSTTNAAENKCVQSDIDS	SSTTNAAENKCVQSDIDSFF	TTNAAENKCVQSDIDSFFKH	NAAENKCVQSDIDSFFKHLI	AENKCVQSDIDSFFKHLIDI	NKCVQSDIDSFFKHLIDIGL	CVQSDIDSFFKHLIDIGLTT	QSDIDSFFKHLIDIGLTTPS	DIDSFFKHLIDIGLTTPSSY	DSFFKHLIDIGLTTPSSYLS	FFKHLIDIGLTTPSSYLSIV	KHLIDIGLTTPSSYLSIVLD	LIDIGLTTPSSYLSIVLDDN
96	G	CKESGGTCNGECKTECKNKC	ESGGTCNGECKTECKNKCEV	GGTCNGECKTECKNKCEVYK	TCNGECKTECKNKCEVYKKF	NGECKTECKNKCEVYKKFIE	ECKTECKNKCEVYKKFIEDC	KTECKNKCEVYKKFIEDCKG	ECKNKCEVYKKFIEDCKGGD	KNKCEVYKKFIEDCKGGDGT	KCEVYKKFIEDCKGGDGTAG	EVYKKFIEDCKGGDGTAGSS	YKKFIEDCKGGDGTAGSSWV	KFIEDCKGGDGTAGSSWVKR	IEDCKGGDGTAGSSWVKRWD	DCKGGDGTAGSSWVKRWDQI	KGGDGTAGSSWVKRWDQIYK	GDGTAGSSWVKRWDQIYKRY	GTAGSSWVKRWDQIYKRYSK	AGSSWVKRWDQIYKRYSKYI	SSWVKRWDQIYKRYSKYIED	WVKRWDQIYKRYSKYIEDAK	KRWDQIYKRYSKYIEDAKRN	WDQIYKRYSKYIEDAKRNRK	QIYKRYSKYIEDAKRNRKAG	YKRYSKYIEDAKRNRKAGTK	RYSKYIEDAKRNRKAGTKNC	SKYIEDAKRNRKAGTKNCGP	YIEDAKRNRKAGTKNCGPSS	EDAKRNRKAGTKNCGPSSTT	AKRNRKAGTKNCGPSSTTNA	RNRKAGTKNCGPSSTTNAAE	RKAGTKNCGPSSTTNAAENK	AGTKNCGPSSTTNAAENKCV	TKNCGPSSTTNAAENKCVQS	NCGPSSTTNAAENKCVQSDI	GPSSTTNAAENKCVQSDIDS	SSTTNAAENKCVQSDIDSFF	TTNAAENKCVQSDIDSFFKH	NAAENKCVQSDIDSFFKHLI	AENKCVQSDIDSFFKHLIDI	NKCVQSDIDSFFKHLIDIGL	CVQSDIDSFFKHLIDIGLTT	QSDIDSFFKHLIDIGLTTPS	DIDSFFKHLIDIGLTTPSSY	DSFFKHLIDIGLTTPSSYLS	FFKHLIDIGLTTPSSYLSIV	KHLIDIGLTTPSSYLSIVLD	LIDIGLTTPSSYLSIVLDDN
97	YPYDVPDYAG	EKCNKETDKSKLQQCNTAVV	CNKETDKSKLQQCNTAVVVN	KETDKSKLQQCNTAVVVNVP	TDKSKLQQCNTAVVVNVPSP	KSKLQQCNTAVVVNVPSPLG	KLQQCNTAVVVNVPSPLGNT	QQCNTAVVVNVPSPLGNTPH	CNTAVVVNVPSPLGNTPHGY	TAVVVNVPSPLGNTPHGYKY	VVVNVPSPLGNTPHGYKYAC	VNVPSPLGNTPHGYKYACQC	VPSPLGNTPHGYKYACQCKI	SPLGNTPHGYKYACQCKIPT	LGNTPHGYKYACQCKIPTNE	NTPHGYKYACQCKIPTNEET	PHGYKYACQCKIPTNEETCD	GYKYACQCKIPTNEETCDDR	KYACQCKIPTNEETCDDRKE	ACQCKIPTNEETCDDRKEYM	QCKIPTNEETCDDRKEYMNQ	KIPTNEETCDDRKEYMNQWS	PTNEETCDDRKEYMNQWSCG	NEETCDDRKEYMNQWSCGSA	ETCDDRKEYMNQWSCGSART	CDDRKEYMNQWSCGSARTMK	DRKEYMNQWSCGSARTMKRG	KEYMNQWSCGSARTMKRGYK	YMNQWSCGSARTMKRGYKND	NQWSCGSARTMKRGYKNDNY	WSCGSARTMKRGYKNDNYEL	CGSARTMKRGYKNDNYELCK	SARTMKRGYKNDNYELCKYN	RTMKRGYKNDNYELCKYNGV	MKRGYKNDNYELCKYNGVDV	RGYKNDNYELCKYNGVDVKP	YKNDNYELCKYNGVDVKPTT	NDNYELCKYNGVDVKPTTVR	NYELCKYNGVDVKPTTVRSN	ELCKYNGVDVKPTTVRSNSS	CKYNGVDVKPTTVRSNSSKL	YNGVDVKPTTVRSNSSKLDD	GVDVKPTTVRSNSSKLDDKD	DVKPTTVRSNSSKLDDKDVT	KPTTVRSNSSKLDDKDVTFF	TTVRSNSSKLDDKDVTFFNL	VRSNSSKLDDKDVTFFNLFE	SNSSKLDDKDVTFFNLFEQW	SSKLDDKDVTFFNLFEQWNK
98	G	EKCNKETDKSKLQQCNTAVV	CNKETDKSKLQQCNTAVVVN	KETDKSKLQQCNTAVVVNVP	TDKSKLQQCNTAVVVNVPSP	KSKLQQCNTAVVVNVPSPLG	KLQQCNTAVVVNVPSPLGNT	QQCNTAVVVNVPSPLGNTPH	CNTAVVVNVPSPLGNTPHGY	TAVVVNVPSPLGNTPHGYKY	VVVNVPSPLGNTPHGYKYAC	VNVPSPLGNTPHGYKYACQC	VPSPLGNTPHGYKYACQCKI	SPLGNTPHGYKYACQCKIPT	LGNTPHGYKYACQCKIPTNE	NTPHGYKYACQCKIPTNEET	PHGYKYACQCKIPTNEETCD	GYKYACQCKIPTNEETCDDR	KYACQCKIPTNEETCDDRKE	ACQCKIPTNEETCDDRKEYM	QCKIPTNEETCDDRKEYMNQ	KIPTNEETCDDRKEYMNQWS	PTNEETCDDRKEYMNQWSCG	NEETCDDRKEYMNQWSCGSA	ETCDDRKEYMNQWSCGSART	CDDRKEYMNQWSCGSARTMK	DRKEYMNQWSCGSARTMKRG	KEYMNQWSCGSARTMKRGYK	YMNQWSCGSARTMKRGYKND	NQWSCGSARTMKRGYKNDNY	WSCGSARTMKRGYKNDNYEL	CGSARTMKRGYKNDNYELCK	SARTMKRGYKNDNYELCKYN	RTMKRGYKNDNYELCKYNGV	MKRGYKNDNYELCKYNGVDV	RGYKNDNYELCKYNGVDVKP	YKNDNYELCKYNGVDVKPTT	NDNYELCKYNGVDVKPTTVR	NYELCKYNGVDVKPTTVRSN	ELCKYNGVDVKPTTVRSNSS	CKYNGVDVKPTTVRSNSSKL	YNGVDVKPTTVRSNSSKLDD	GVDVKPTTVRSNSSKLDDKD	DVKPTTVRSNSSKLDDKDVT	KPTTVRSNSSKLDDKDVTFF	TTVRSNSSKLDDKDVTFFNL	VRSNSSKLDDKDVTFFNLFE	SNSSKLDDKDVTFFNLFEQW	SSKLDDKDVTFFNLFEQWNK
99	YPYDVPDYAG	NEKNVLSRVSDEAAQPKFSD	KNVLSRVSDEAAQPKFSDNE	VLSRVSDEAAQPKFSDNERD	SRVSDEAAQPKFSDNERDRN	VSDEAAQPKFSDNERDRNSI	DEAAQPKFSDNERDRNSITH	AAQPKFSDNERDRNSITHED	QPKFSDNERDRNSITHEDKN	KFSDNERDRNSITHEDKNCK	SDNERDRNSITHEDKNCKEK	NERDRNSITHEDKNCKEKCK	RDRNSITHEDKNCKEKCKCY	RNSITHEDKNCKEKCKCYSL	SITHEDKNCKEKCKCYSLWI	THEDKNCKEKCKCYSLWIEK	EDKNCKEKCKCYSLWIEKIN	KNCKEKCKCYSLWIEKINDQ	CKEKCKCYSLWIEKINDQWD	EKCKCYSLWIEKINDQWDKQ	CKCYSLWIEKINDQWDKQKD	CYSLWIEKINDQWDKQKDNY	SLWIEKINDQWDKQKDNYNK	WIEKINDQWDKQKDNYNKFQ	EKINDQWDKQKDNYNKFQRK	INDQWDKQKDNYNKFQRKQI	DQWDKQKDNYNKFQRKQIYD	WDKQKDNYNKFQRKQIYDAN	KQKDNYNKFQRKQIYDANKG	KDNYNKFQRKQIYDANKGSQ	NYNKFQRKQIYDANKGSQNK	NKFQRKQIYDANKGSQNKKV	FQRKQIYDANKGSQNKKVVS	RKQIYDANKGSQNKKVVSLS	QIYDANKGSQNKKVVSLSNF	YDANKGSQNKKVVSLSNFLF	ANKGSQNKKVVSLSNFLFFS	KGSQNKKVVSLSNFLFFSCW	SQNKKVVSLSNFLFFSCWEE	NKKVVSLSNFLFFSCWEEYI	KVVSLSNFLFFSCWEEYIQK	VSLSNFLFFSCWEEYIQKYF	LSNFLFFSCWEEYIQKYFNG	NFLFFSCWEEYIQKYFNGDW	LFFSCWEEYIQKYFNGDWSK	FSCWEEYIQKYFNGDWSKIK	CWEEYIQKYFNGDWSKIKNI	EEYIQKYFNGDWSKIKNIGS	YIQKYFNGDWSKIKNIGSDT
100	G	NEKNVLSRVSDEAAQPKFSD	KNVLSRVSDEAAQPKFSDNE	VLSRVSDEAAQPKFSDNERD	SRVSDEAAQPKFSDNERDRN	VSDEAAQPKFSDNERDRNSI	DEAAQPKFSDNERDRNSITH	AAQPKFSDNERDRNSITHED	QPKFSDNERDRNSITHEDKN	KFSDNERDRNSITHEDKNCK	SDNERDRNSITHEDKNCKEK	NERDRNSITHEDKNCKEKCK	RDRNSITHEDKNCKEKCKCY	RNSITHEDKNCKEKCKCYSL	SITHEDKNCKEKCKCYSLWI	THEDKNCKEKCKCYSLWIEK	EDKNCKEKCKCYSLWIEKIN	KNCKEKCKCYSLWIEKINDQ	CKEKCKCYSLWIEKINDQWD	EKCKCYSLWIEKINDQWDKQ	CKCYSLWIEKINDQWDKQKD	CYSLWIEKINDQWDKQKDNY	SLWIEKINDQWDKQKDNYNK	WIEKINDQWDKQKDNYNKFQ	EKINDQWDKQKDNYNKFQRK	INDQWDKQKDNYNKFQRKQI	DQWDKQKDNYNKFQRKQIYD	WDKQKDNYNKFQRKQIYDAN	KQKDNYNKFQRKQIYDANKG	KDNYNKFQRKQIYDANKGSQ	NYNKFQRKQIYDANKGSQNK	NKFQRKQIYDANKGSQNKKV	FQRKQIYDANKGSQNKKVVS	RKQIYDANKGSQNKKVVSLS	QIYDANKGSQNKKVVSLSNF	YDANKGSQNKKVVSLSNFLF	ANKGSQNKKVVSLSNFLFFS	KGSQNKKVVSLSNFLFFSCW	SQNKKVVSLSNFLFFSCWEE	NKKVVSLSNFLFFSCWEEYI	KVVSLSNFLFFSCWEEYIQK	VSLSNFLFFSCWEEYIQKYF	LSNFLFFSCWEEYIQKYFNG	NFLFFSCWEEYIQKYFNGDW	LFFSCWEEYIQKYFNGDWSK	FSCWEEYIQKYFNGDWSKIK	CWEEYIQKYFNGDWSKIKNI	EEYIQKYFNGDWSKIKNIGS	YIQKYFNGDWSKIKNIGSDT
101	YPYDVPDYAG	FSEKLNNAEKKCKENESTNN	EKLNNAEKKCKENESTNNKM	LNNAEKKCKENESTNNKMKS	NAEKKCKENESTNNKMKSSE	EKKCKENESTNNKMKSSETS	KCKENESTNNKMKSSETSCD	KENESTNNKMKSSETSCDCS	NESTNNKMKSSETSCDCSEP	STNNKMKSSETSCDCSEPIY	NNKMKSSETSCDCSEPIYIR	KMKSSETSCDCSEPIYIRGC	KSSETSCDCSEPIYIRGCQP	SETSCDCSEPIYIRGCQPKI	TSCDCSEPIYIRGCQPKIYD	CDCSEPIYIRGCQPKIYDGK	CSEPIYIRGCQPKIYDGKIF	EPIYIRGCQPKIYDGKIFPG	IYIRGCQPKIYDGKIFPGKG	IRGCQPKIYDGKIFPGKGGE	GCQPKIYDGKIFPGKGGEKQ	QPKIYDGKIFPGKGGEKQWI	KIYDGKIFPGKGGEKQWICK	YDGKIFPGKGGEKQWICKDT	GKIFPGKGGEKQWICKDTII	IFPGKGGEKQWICKDTIIHG	PGKGGEKQWICKDTIIHGDT	KGGEKQWICKDTIIHGDTNG	GEKQWICKDTIIHGDTNGAC	KQWICKDTIIHGDTNGACIP	WICKDTIIHGDTNGACIPPR	CKDTIIHGDTNGACIPPRTQ	DTIIHGDTNGACIPPRTQNL	IIHGDTNGACIPPRTQNLCV	HGDTNGACIPPRTQNLCVGE	DTNGACIPPRTQNLCVGELW	NGACIPPRTQNLCVGELWDK	ACIPPRTQNLCVGELWDKRY	IPPRTQNLCVGELWDKRYGG	PRTQNLCVGELWDKRYGGRS	TQNLCVGELWDKRYGGRSNI	NLCVGELWDKRYGGRSNIKN	CVGELWDKRYGGRSNIKNDT	GELWDKRYGGRSNIKNDTKE	LWDKRYGGRSNIKNDTKESL	DKRYGGRSNIKNDTKESLKQ	RYGGRSNIKNDTKESLKQKI	GGRSNIKNDTKESLKQKIKN	RSNIKNDTKESLKQKIKNAI
102	G	FSEKLNNAEKKCKENESTNN	EKLNNAEKKCKENESTNNKM	LNNAEKKCKENESTNNKMKS	NAEKKCKENESTNNKMKSSE	EKKCKENESTNNKMKSSETS	KCKENESTNNKMKSSETSCD	KENESTNNKMKSSETSCDCS	NESTNNKMKSSETSCDCSEP	STNNKMKSSETSCDCSEPIY	NNKMKSSETSCDCSEPIYIR	KMKSSETSCDCSEPIYIRGC	KSSETSCDCSEPIYIRGCQP	SETSCDCSEPIYIRGCQPKI	TSCDCSEPIYIRGCQPKIYD	CDCSEPIYIRGCQPKIYDGK	CSEPIYIRGCQPKIYDGKIF	EPIYIRGCQPKIYDGKIFPG	IYIRGCQPKIYDGKIFPGKG	IRGCQPKIYDGKIFPGKGGE	GCQPKIYDGKIFPGKGGEKQ	QPKIYDGKIFPGKGGEKQWI	KIYDGKIFPGKGGEKQWICK	YDGKIFPGKGGEKQWICKDT	GKIFPGKGGEKQWICKDTII	IFPGKGGEKQWICKDTIIHG	PGKGGEKQWICKDTIIHGDT	KGGEKQWICKDTIIHGDTNG	GEKQWICKDTIIHGDTNGAC	KQWICKDTIIHGDTNGACIP	WICKDTIIHGDTNGACIPPR	CKDTIIHGDTNGACIPPRTQ	DTIIHGDTNGACIPPRTQNL	IIHGDTNGACIPPRTQNLCV	HGDTNGACIPPRTQNLCVGE	DTNGACIPPRTQNLCVGELW	NGACIPPRTQNLCVGELWDK	ACIPPRTQNLCVGELWDKRY	IPPRTQNLCVGELWDKRYGG	PRTQNLCVGELWDKRYGGRS	TQNLCVGELWDKRYGGRSNI	NLCVGELWDKRYGGRSNIKN	CVGELWDKRYGGRSNIKNDT	GELWDKRYGGRSNIKNDTKE	LWDKRYGGRSNIKNDTKESL	DKRYGGRSNIKNDTKESLKQ	RYGGRSNIKNDTKESLKQKI	GGRSNIKNDTKESLKQKIKN	RSNIKNDTKESLKQKIKNAI
103	YPYDVPDYAG	SRNPMKGQKEKEEKNNDSNG	NPMKGQKEKEEKNNDSNGLP	MKGQKEKEEKNNDSNGLPKG	GQKEKEEKNNDSNGLPKGFC	KEKEEKNNDSNGLPKGFCHA	KEEKNNDSNGLPKGFCHAVQ	EKNNDSNGLPKGFCHAVQRS	NNDSNGLPKGFCHAVQRSFI	DSNGLPKGFCHAVQRSFIDY	NGLPKGFCHAVQRSFIDYKN	LPKGFCHAVQRSFIDYKNMI	KGFCHAVQRSFIDYKNMILG	FCHAVQRSFIDYKNMILGTS	HAVQRSFIDYKNMILGTSVN	VQRSFIDYKNMILGTSVNIY	RSFIDYKNMILGTSVNIYEY	FIDYKNMILGTSVNIYEYIG	DYKNMILGTSVNIYEYIGKL	KNMILGTSVNIYEYIGKLQE	MILGTSVNIYEYIGKLQEDI	LGTSVNIYEYIGKLQEDIKK	TSVNIYEYIGKLQEDIKKII	VNIYEYIGKLQEDIKKIIEK	IYEYIGKLQEDIKKIIEKGT	EYIGKLQEDIKKIIEKGTTK	IGKLQEDIKKIIEKGTTKQN	KLQEDIKKIIEKGTTKQNGK	QEDIKKIIEKGTTKQNGKTV	DIKKIIEKGTTKQNGKTVGS	KKIIEKGTTKQNGKTVGSGA	IIEKGTTKQNGKTVGSGAEN	EKGTTKQNGKTVGSGAENVN	GTTKQNGKTVGSGAENVNAW	TKQNGKTVGSGAENVNAWWK	QNGKTVGSGAENVNAWWKGI	GKTVGSGAENVNAWWKGIEG	TVGSGAENVNAWWKGIEGEM	GSGAENVNAWWKGIEGEMWD	GAENVNAWWKGIEGEMWDAV	ENVNAWWKGIEGEMWDAVRC	VNAWWKGIEGEMWDAVRCAI	AWWKGIEGEMWDAVRCAITK	WKGIEGEMWDAVRCAITKIN	GIEGEMWDAVRCAITKINKK	EGEMWDAVRCAITKINKKQK	EMWDAVRCAITKINKKQKKN	WDAVRCAITKINKKQKKNGT	AVRCAITKINKKQKKNGTFS
104	G	SRNPMKGQKEKEEKNNDSNG	NPMKGQKEKEEKNNDSNGLP	MKGQKEKEEKNNDSNGLPKG	GQKEKEEKNNDSNGLPKGFC	KEKEEKNNDSNGLPKGFCHA	KEEKNNDSNGLPKGFCHAVQ	EKNNDSNGLPKGFCHAVQRS	NNDSNGLPKGFCHAVQRSFI	DSNGLPKGFCHAVQRSFIDY	NGLPKGFCHAVQRSFIDYKN	LPKGFCHAVQRSFIDYKNMI	KGFCHAVQRSFIDYKNMILG	FCHAVQRSFIDYKNMILGTS	HAVQRSFIDYKNMILGTSVN	VQRSFIDYKNMILGTSVNIY	RSFIDYKNMILGTSVNIYEY	FIDYKNMILGTSVNIYEYIG	DYKNMILGTSVNIYEYIGKL	KNMILGTSVNIYEYIGKLQE	MILGTSVNIYEYIGKLQEDI	LGTSVNIYEYIGKLQEDIKK	TSVNIYEYIGKLQEDIKKII	VNIYEYIGKLQEDIKKIIEK	IYEYIGKLQEDIKKIIEKGT	EYIGKLQEDIKKIIEKGTTK	IGKLQEDIKKIIEKGTTKQN	KLQEDIKKIIEKGTTKQNGK	QEDIKKIIEKGTTKQNGKTV	DIKKIIEKGTTKQNGKTVGS	KKIIEKGTTKQNGKTVGSGA	IIEKGTTKQNGKTVGSGAEN	EKGTTKQNGKTVGSGAENVN	GTTKQNGKTVGSGAENVNAW	TKQNGKTVGSGAENVNAWWK	QNGKTVGSGAENVNAWWKGI	GKTVGSGAENVNAWWKGIEG	TVGSGAENVNAWWKGIEGEM	GSGAENVNAWWKGIEGEMWD	GAENVNAWWKGIEGEMWDAV	ENVNAWWKGIEGEMWDAVRC	VNAWWKGIEGEMWDAVRCAI	AWWKGIEGEMWDAVRCAITK	WKGIEGEMWDAVRCAITKIN	GIEGEMWDAVRCAITKINKK	EGEMWDAVRCAITKINKKQK	EMWDAVRCAITKINKKQKKN	WDAVRCAITKINKKQKKNGT	AVRCAITKINKKQKKNGTFS
105	YPYDVPDYAG	SWFKEWSEQFCIERLQYEKN	FKEWSEQFCIERLQYEKNIR	EWSEQFCIERLQYEKNIRDA	SEQFCIERLQYEKNIRDACT	QFCIERLQYEKNIRDACTNN	CIERLQYEKNIRDACTNNGQ	ERLQYEKNIRDACTNNGQGD	LQYEKNIRDACTNNGQGDKI	YEKNIRDACTNNGQGDKIQG	KNIRDACTNNGQGDKIQGDC	IRDACTNNGQGDKIQGDCKR	DACTNNGQGDKIQGDCKRKC	CTNNGQGDKIQGDCKRKCEE	NNGQGDKIQGDCKRKCEEYK	GQGDKIQGDCKRKCEEYKKY	GDKIQGDCKRKCEEYKKYIS	KIQGDCKRKCEEYKKYISEK	QGDCKRKCEEYKKYISEKKQ	DCKRKCEEYKKYISEKKQEW	KRKCEEYKKYISEKKQEWDK	KCEEYKKYISEKKQEWDKQK	EEYKKYISEKKQEWDKQKTK	YKKYISEKKQEWDKQKTKYE	KYISEKKQEWDKQKTKYENK	ISEKKQEWDKQKTKYENKYV	EKKQEWDKQKTKYENKYVGK	KQEWDKQKTKYENKYVGKSA	EWDKQKTKYENKYVGKSASD	DKQKTKYENKYVGKSASDLL	QKTKYENKYVGKSASDLLKE	TKYENKYVGKSASDLLKENY	YENKYVGKSASDLLKENYPE	NKYVGKSASDLLKENYPECI	YVGKSASDLLKENYPECISA	GKSASDLLKENYPECISANF	SASDLLKENYPECISANFDF	SDLLKENYPECISANFDFIF	LLKENYPECISANFDFIFND	KENYPECISANFDFIFNDNI	NYPECISANFDFIFNDNIEY	PECISANFDFIFNDNIEYKT	CISANFDFIFNDNIEYKTYY	SANFDFIFNDNIEYKTYYPY	NFDFIFNDNIEYKTYYPYGD	DFIFNDNIEYKTYYPYGDYS	IFNDNIEYKTYYPYGDYSSI	NDNIEYKTYYPYGDYSSICS	NIEYKTYYPYGDYSSICSCE
106	G	SWFKEWSEQFCIERLQYEKN	FKEWSEQFCIERLQYEKNIR	EWSEQFCIERLQYEKNIRDA	SEQFCIERLQYEKNIRDACT	QFCIERLQYEKNIRDACTNN	CIERLQYEKNIRDACTNNGQ	ERLQYEKNIRDACTNNGQGD	LQYEKNIRDACTNNGQGDKI	YEKNIRDACTNNGQGDKIQG	KNIRDACTNNGQGDKIQGDC	IRDACTNNGQGDKIQGDCKR	DACTNNGQGDKIQGDCKRKC	CTNNGQGDKIQGDCKRKCEE	NNGQGDKIQGDCKRKCEEYK	GQGDKIQGDCKRKCEEYKKY	GDKIQGDCKRKCEEYKKYIS	KIQGDCKRKCEEYKKYISEK	QGDCKRKCEEYKKYISEKKQ	DCKRKCEEYKKYISEKKQEW	KRKCEEYKKYISEKKQEWDK	KCEEYKKYISEKKQEWDKQK	EEYKKYISEKKQEWDKQKTK	YKKYISEKKQEWDKQKTKYE	KYISEKKQEWDKQKTKYENK	ISEKKQEWDKQKTKYENKYV	EKKQEWDKQKTKYENKYVGK	KQEWDKQKTKYENKYVGKSA	EWDKQKTKYENKYVGKSASD	DKQKTKYENKYVGKSASDLL	QKTKYENKYVGKSASDLLKE	TKYENKYVGKSASDLLKENY	YENKYVGKSASDLLKENYPE	NKYVGKSASDLLKENYPECI	YVGKSASDLLKENYPECISA	GKSASDLLKENYPECISANF	SASDLLKENYPECISANFDF	SDLLKENYPECISANFDFIF	LLKENYPECISANFDFIFND	KENYPECISANFDFIFNDNI	NYPECISANFDFIFNDNIEY	PECISANFDFIFNDNIEYKT	CISANFDFIFNDNIEYKTYY	SANFDFIFNDNIEYKTYYPY	NFDFIFNDNIEYKTYYPYGD	DFIFNDNIEYKTYYPYGDYS	IFNDNIEYKTYYPYGDYSSI	NDNIEYKTYYPYGDYSSICS	NIEYKTYYPYGDYSSICSCE
107	YPYDVPDYAG	CHEKGNDRTWSKKYIKKLEN	EKGNDRTWSKKYIKKLENGR	GNDRTWSKKYIKKLENGRTL	DRTWSKKYIKKLENGRTLEG	TWSKKYIKKLENGRTLEGVY	SKKYIKKLENGRTLEGVYVP	KYIKKLENGRTLEGVYVPPR	IKKLENGRTLEGVYVPPRRQ	KLENGRTLEGVYVPPRRQQL	ENGRTLEGVYVPPRRQQLCL	GRTLEGVYVPPRRQQLCLYE	TLEGVYVPPRRQQLCLYELF	EGVYVPPRRQQLCLYELFPI	VYVPPRRQQLCLYELFPIII	VPPRRQQLCLYELFPIIIKN	PRRQQLCLYELFPIIIKNKN	RQQLCLYELFPIIIKNKNDI	QLCLYELFPIIIKNKNDITN	CLYELFPIIIKNKNDITNAK	YELFPIIIKNKNDITNAKKE	LFPIIIKNKNDITNAKKELL	PIIIKNKNDITNAKKELLET	IIKNKNDITNAKKELLETLQ	KNKNDITNAKKELLETLQIV	KNDITNAKKELLETLQIVAE	DITNAKKELLETLQIVAERE	TNAKKELLETLQIVAEREAY	AKKELLETLQIVAEREAYYL	KELLETLQIVAEREAYYLWK	LLETLQIVAEREAYYLWKQY	ETLQIVAEREAYYLWKQYHA	LQIVAEREAYYLWKQYHAHN	IVAEREAYYLWKQYHAHNDT	AEREAYYLWKQYHAHNDTTY	REAYYLWKQYHAHNDTTYLA	AYYLWKQYHAHNDTTYLAHK	YLWKQYHAHNDTTYLAHKKA	WKQYHAHNDTTYLAHKKACC	QYHAHNDTTYLAHKKACCAI	HAHNDTTYLAHKKACCAIRG	HNDTTYLAHKKACCAIRGSF	DTTYLAHKKACCAIRGSFYD	TYLAHKKACCAIRGSFYDLE	LAHKKACCAIRGSFYDLEDI	HKKACCAIRGSFYDLEDIIK	KACCAIRGSFYDLEDIIKGN	CCAIRGSFYDLEDIIKGNDL	AIRGSFYDLEDIIKGNDLVH
108	G	CHEKGNDRTWSKKYIKKLEN	EKGNDRTWSKKYIKKLENGR	GNDRTWSKKYIKKLENGRTL	DRTWSKKYIKKLENGRTLEG	TWSKKYIKKLENGRTLEGVY	SKKYIKKLENGRTLEGVYVP	KYIKKLENGRTLEGVYVPPR	IKKLENGRTLEGVYVPPRRQ	KLENGRTLEGVYVPPRRQQL	ENGRTLEGVYVPPRRQQLCL	GRTLEGVYVPPRRQQLCLYE	TLEGVYVPPRRQQLCLYELF	EGVYVPPRRQQLCLYELFPI	VYVPPRRQQLCLYELFPIII	VPPRRQQLCLYELFPIIIKN	PRRQQLCLYELFPIIIKNKN	RQQLCLYELFPIIIKNKNDI	QLCLYELFPIIIKNKNDITN	CLYELFPIIIKNKNDITNAK	YELFPIIIKNKNDITNAKKE	LFPIIIKNKNDITNAKKELL	PIIIKNKNDITNAKKELLET	IIKNKNDITNAKKELLETLQ	KNKNDITNAKKELLETLQIV	KNDITNAKKELLETLQIVAE	DITNAKKELLETLQIVAERE	TNAKKELLETLQIVAEREAY	AKKELLETLQIVAEREAYYL	KELLETLQIVAEREAYYLWK	LLETLQIVAEREAYYLWKQY	ETLQIVAEREAYYLWKQYHA	LQIVAEREAYYLWKQYHAHN	IVAEREAYYLWKQYHAHNDT	AEREAYYLWKQYHAHNDTTY	REAYYLWKQYHAHNDTTYLA	AYYLWKQYHAHNDTTYLAHK	YLWKQYHAHNDTTYLAHKKA	WKQYHAHNDTTYLAHKKACC	QYHAHNDTTYLAHKKACCAI	HAHNDTTYLAHKKACCAIRG	HNDTTYLAHKKACCAIRGSF	DTTYLAHKKACCAIRGSFYD	TYLAHKKACCAIRGSFYDLE	LAHKKACCAIRGSFYDLEDI	HKKACCAIRGSFYDLEDIIK	KACCAIRGSFYDLEDIIKGN	CCAIRGSFYDLEDIIKGNDL	AIRGSFYDLEDIIKGNDLVH
109	YPYDVPDYAG	NKNDIETKRARTDWWENEAI	NDIETKRARTDWWENEAIAV	IETKRARTDWWENEAIAVPN	TKRARTDWWENEAIAVPNIT	RARTDWWENEAIAVPNITGA	RTDWWENEAIAVPNITGANK	DWWENEAIAVPNITGANKSD	WENEAIAVPNITGANKSDPK	NEAIAVPNITGANKSDPKTI	AIAVPNITGANKSDPKTIRQ	AVPNITGANKSDPKTIRQLV	PNITGANKSDPKTIRQLVWD	ITGANKSDPKTIRQLVWDAM	GANKSDPKTIRQLVWDAMQS	NKSDPKTIRQLVWDAMQSGV	SDPKTIRQLVWDAMQSGVRK	PKTIRQLVWDAMQSGVRKAI	TIRQLVWDAMQSGVRKAIDE	RQLVWDAMQSGVRKAIDEEK	LVWDAMQSGVRKAIDEEKEK	WDAMQSGVRKAIDEEKEKKK	AMQSGVRKAIDEEKEKKKPN	QSGVRKAIDEEKEKKKPNEN	GVRKAIDEEKEKKKPNENFP	RKAIDEEKEKKKPNENFPPC	AIDEEKEKKKPNENFPPCMG	DEEKEKKKPNENFPPCMGVQ	EKEKKKPNENFPPCMGVQHI	EKKKPNENFPPCMGVQHIGI	KKPNENFPPCMGVQHIGIAK	PNENFPPCMGVQHIGIAKPQ	ENFPPCMGVQHIGIAKPQFI	FPPCMGVQHIGIAKPQFIRW	PCMGVQHIGIAKPQFIRWLE	MGVQHIGIAKPQFIRWLEEW	VQHIGIAKPQFIRWLEEWTN	HIGIAKPQFIRWLEEWTNEF	GIAKPQFIRWLEEWTNEFCE	AKPQFIRWLEEWTNEFCEKY	PQFIRWLEEWTNEFCEKYTK	FIRWLEEWTNEFCEKYTKYF	RWLEEWTNEFCEKYTKYFED	LEEWTNEFCEKYTKYFEDMK	EWTNEFCEKYTKYFEDMKSN	TNEFCEKYTKYFEDMKSNCN	EFCEKYTKYFEDMKSNCNLR	CEKYTKYFEDMKSNCNLRKG	KYTKYFEDMKSNCNLRKGAD
110	G	NKNDIETKRARTDWWENEAI	NDIETKRARTDWWENEAIAV	IETKRARTDWWENEAIAVPN	TKRARTDWWENEAIAVPNIT	RARTDWWENEAIAVPNITGA	RTDWWENEAIAVPNITGANK	DWWENEAIAVPNITGANKSD	WENEAIAVPNITGANKSDPK	NEAIAVPNITGANKSDPKTI	AIAVPNITGANKSDPKTIRQ	AVPNITGANKSDPKTIRQLV	PNITGANKSDPKTIRQLVWD	ITGANKSDPKTIRQLVWDAM	GANKSDPKTIRQLVWDAMQS	NKSDPKTIRQLVWDAMQSGV	SDPKTIRQLVWDAMQSGVRK	PKTIRQLVWDAMQSGVRKAI	TIRQLVWDAMQSGVRKAIDE	RQLVWDAMQSGVRKAIDEEK	LVWDAMQSGVRKAIDEEKEK	WDAMQSGVRKAIDEEKEKKK	AMQSGVRKAIDEEKEKKKPN	QSGVRKAIDEEKEKKKPNEN	GVRKAIDEEKEKKKPNENFP	RKAIDEEKEKKKPNENFPPC	AIDEEKEKKKPNENFPPCMG	DEEKEKKKPNENFPPCMGVQ	EKEKKKPNENFPPCMGVQHI	EKKKPNENFPPCMGVQHIGI	KKPNENFPPCMGVQHIGIAK	PNENFPPCMGVQHIGIAKPQ	ENFPPCMGVQHIGIAKPQFI	FPPCMGVQHIGIAKPQFIRW	PCMGVQHIGIAKPQFIRWLE	MGVQHIGIAKPQFIRWLEEW	VQHIGIAKPQFIRWLEEWTN	HIGIAKPQFIRWLEEWTNEF	GIAKPQFIRWLEEWTNEFCE	AKPQFIRWLEEWTNEFCEKY	PQFIRWLEEWTNEFCEKYTK	FIRWLEEWTNEFCEKYTKYF	RWLEEWTNEFCEKYTKYFED	LEEWTNEFCEKYTKYFEDMK	EWTNEFCEKYTKYFEDMKSN	TNEFCEKYTKYFEDMKSNCN	EFCEKYTKYFEDMKSNCNLR	CEKYTKYFEDMKSNCNLRKG	KYTKYFEDMKSNCNLRKGAD
111	YPYDVPDYAG	NWLNPKRIEWNGMSNYYNKI	LNPKRIEWNGMSNYYNKIYR	PKRIEWNGMSNYYNKIYRKS	RIEWNGMSNYYNKIYRKSNK	EWNGMSNYYNKIYRKSNKES	NGMSNYYNKIYRKSNKESED	MSNYYNKIYRKSNKESEDGK	NYYNKIYRKSNKESEDGKDY	YNKIYRKSNKESEDGKDYSM	KIYRKSNKESEDGKDYSMIM	YRKSNKESEDGKDYSMIMEP	KSNKESEDGKDYSMIMEPTV	NKESEDGKDYSMIMEPTVID	ESEDGKDYSMIMEPTVIDYL	EDGKDYSMIMEPTVIDYLNK	GKDYSMIMEPTVIDYLNKRC	DYSMIMEPTVIDYLNKRCNG	SMIMEPTVIDYLNKRCNGEI	IMEPTVIDYLNKRCNGEING	EPTVIDYLNKRCNGEINGNY	TVIDYLNKRCNGEINGNYIC	IDYLNKRCNGEINGNYICCS	YLNKRCNGEINGNYICCSCK	NKRCNGEINGNYICCSCKNI	RCNGEINGNYICCSCKNIGE	NGEINGNYICCSCKNIGENS	EINGNYICCSCKNIGENSTS	NGNYICCSCKNIGENSTSGT	NYICCSCKNIGENSTSGTVN	ICCSCKNIGENSTSGTVNKK	CSCKNIGENSTSGTVNKKLQ	CKNIGENSTSGTVNKKLQKK	NIGENSTSGTVNKKLQKKET	GENSTSGTVNKKLQKKETQC	NSTSGTVNKKLQKKETQCED	TSGTVNKKLQKKETQCEDNK	GTVNKKLQKKETQCEDNKGP	VNKKLQKKETQCEDNKGPLD	KKLQKKETQCEDNKGPLDLM	LQKKETQCEDNKGPLDLMNK	KKETQCEDNKGPLDLMNKVL	ETQCEDNKGPLDLMNKVLNK	QCEDNKGPLDLMNKVLNKMD	EDNKGPLDLMNKVLNKMDPK	NKGPLDLMNKVLNKMDPKYS	GPLDLMNKVLNKMDPKYSEH	LDLMNKVLNKMDPKYSEHKM	LMNKVLNKMDPKYSEHKMKC
112	G	NWLNPKRIEWNGMSNYYNKI	LNPKRIEWNGMSNYYNKIYR	PKRIEWNGMSNYYNKIYRKS	RIEWNGMSNYYNKIYRKSNK	EWNGMSNYYNKIYRKSNKES	NGMSNYYNKIYRKSNKESED	MSNYYNKIYRKSNKESEDGK	NYYNKIYRKSNKESEDGKDY	YNKIYRKSNKESEDGKDYSM	KIYRKSNKESEDGKDYSMIM	YRKSNKESEDGKDYSMIMEP	KSNKESEDGKDYSMIMEPTV	NKESEDGKDYSMIMEPTVID	ESEDGKDYSMIMEPTVIDYL	EDGKDYSMIMEPTVIDYLNK	GKDYSMIMEPTVIDYLNKRC	DYSMIMEPTVIDYLNKRCNG	SMIMEPTVIDYLNKRCNGEI	IMEPTVIDYLNKRCNGEING	EPTVIDYLNKRCNGEINGNY	TVIDYLNKRCNGEINGNYIC	IDYLNKRCNGEINGNYICCS	YLNKRCNGEINGNYICCSCK	NKRCNGEINGNYICCSCKNI	RCNGEINGNYICCSCKNIGE	NGEINGNYICCSCKNIGENS	EINGNYICCSCKNIGENSTS	NGNYICCSCKNIGENSTSGT	NYICCSCKNIGENSTSGTVN	ICCSCKNIGENSTSGTVNKK	CSCKNIGENSTSGTVNKKLQ	CKNIGENSTSGTVNKKLQKK	NIGENSTSGTVNKKLQKKET	GENSTSGTVNKKLQKKETQC	NSTSGTVNKKLQKKETQCED	TSGTVNKKLQKKETQCEDNK	GTVNKKLQKKETQCEDNKGP	VNKKLQKKETQCEDNKGPLD	KKLQKKETQCEDNKGPLDLM	LQKKETQCEDNKGPLDLMNK	KKETQCEDNKGPLDLMNKVL	ETQCEDNKGPLDLMNKVLNK	QCEDNKGPLDLMNKVLNKMD	EDNKGPLDLMNKVLNKMDPK	NKGPLDLMNKVLNKMDPKYS	GPLDLMNKVLNKMDPKYSEH	LDLMNKVLNKMDPKYSEHKM	LMNKVLNKMDPKYSEHKMKC
113	YPYDVPDYAG	IKDYKLYPLDRCFDDKSKMK	DYKLYPLDRCFDDKSKMKVC	KLYPLDRCFDDKSKMKVCDL	YPLDRCFDDKSKMKVCDLIG	LDRCFDDKSKMKVCDLIGDA	RCFDDKSKMKVCDLIGDAIG	FDDKSKMKVCDLIGDAIGCK	DKSKMKVCDLIGDAIGCKHK	SKMKVCDLIGDAIGCKHKTK	MKVCDLIGDAIGCKHKTKLD	VCDLIGDAIGCKHKTKLDEL	DLIGDAIGCKHKTKLDELDE	IGDAIGCKHKTKLDELDEWN	DAIGCKHKTKLDELDEWNDV	IGCKHKTKLDELDEWNDVDM	CKHKTKLDELDEWNDVDMRD	HKTKLDELDEWNDVDMRDPY	TKLDELDEWNDVDMRDPYNK	LDELDEWNDVDMRDPYNKYK	ELDEWNDVDMRDPYNKYKGV	DEWNDVDMRDPYNKYKGVLI	WNDVDMRDPYNKYKGVLIPP	DVDMRDPYNKYKGVLIPPRR	DMRDPYNKYKGVLIPPRRRQ	RDPYNKYKGVLIPPRRRQLC	PYNKYKGVLIPPRRRQLCFS	NKYKGVLIPPRRRQLCFSRI	YKGVLIPPRRRQLCFSRIVR	GVLIPPRRRQLCFSRIVRGP	LIPPRRRQLCFSRIVRGPAN	PPRRRQLCFSRIVRGPANLR	RRRQLCFSRIVRGPANLRNL	RQLCFSRIVRGPANLRNLKE	LCFSRIVRGPANLRNLKEFK	FSRIVRGPANLRNLKEFKEE	RIVRGPANLRNLKEFKEEIL	VRGPANLRNLKEFKEEILKG	GPANLRNLKEFKEEILKGAQ	ANLRNLKEFKEEILKGAQSE	LRNLKEFKEEILKGAQSEGK	NLKEFKEEILKGAQSEGKFL	KEFKEEILKGAQSEGKFLGN	FKEEILKGAQSEGKFLGNYY	EEILKGAQSEGKFLGNYYNE	ILKGAQSEGKFLGNYYNEDK	KGAQSEGKFLGNYYNEDKDK	AQSEGKFLGNYYNEDKDKEK	SEGKFLGNYYNEDKDKEKAL
114	G	IKDYKLYPLDRCFDDKSKMK	DYKLYPLDRCFDDKSKMKVC	KLYPLDRCFDDKSKMKVCDL	YPLDRCFDDKSKMKVCDLIG	LDRCFDDKSKMKVCDLIGDA	RCFDDKSKMKVCDLIGDAIG	FDDKSKMKVCDLIGDAIGCK	DKSKMKVCDLIGDAIGCKHK	SKMKVCDLIGDAIGCKHKTK	MKVCDLIGDAIGCKHKTKLD	VCDLIGDAIGCKHKTKLDEL	DLIGDAIGCKHKTKLDELDE	IGDAIGCKHKTKLDELDEWN	DAIGCKHKTKLDELDEWNDV	IGCKHKTKLDELDEWNDVDM	CKHKTKLDELDEWNDVDMRD	HKTKLDELDEWNDVDMRDPY	TKLDELDEWNDVDMRDPYNK	LDELDEWNDVDMRDPYNKYK	ELDEWNDVDMRDPYNKYKGV	DEWNDVDMRDPYNKYKGVLI	WNDVDMRDPYNKYKGVLIPP	DVDMRDPYNKYKGVLIPPRR	DMRDPYNKYKGVLIPPRRRQ	RDPYNKYKGVLIPPRRRQLC	PYNKYKGVLIPPRRRQLCFS	NKYKGVLIPPRRRQLCFSRI	YKGVLIPPRRRQLCFSRIVR	GVLIPPRRRQLCFSRIVRGP	LIPPRRRQLCFSRIVRGPAN	PPRRRQLCFSRIVRGPANLR	RRRQLCFSRIVRGPANLRNL	RQLCFSRIVRGPANLRNLKE	LCFSRIVRGPANLRNLKEFK	FSRIVRGPANLRNLKEFKEE	RIVRGPANLRNLKEFKEEIL	VRGPANLRNLKEFKEEILKG	GPANLRNLKEFKEEILKGAQ	ANLRNLKEFKEEILKGAQSE	LRNLKEFKEEILKGAQSEGK	NLKEFKEEILKGAQSEGKFL	KEFKEEILKGAQSEGKFLGN	FKEEILKGAQSEGKFLGNYY	EEILKGAQSEGKFLGNYYNE	ILKGAQSEGKFLGNYYNEDK	KGAQSEGKFLGNYYNEDKDK	AQSEGKFLGNYYNEDKDKEK	SEGKFLGNYYNEDKDKEKAL
115	YPYDVPDYAG	MLTNIQFKDIKRKLDRLLEK	TNIQFKDIKRKLDRLLEKET	IQFKDIKRKLDRLLEKETNN	FKDIKRKLDRLLEKETNNTE	DIKRKLDRLLEKETNNTEKV	KRKLDRLLEKETNNTEKVDD	KLDRLLEKETNNTEKVDDWW	DRLLEKETNNTEKVDDWWET	LLEKETNNTEKVDDWWETNK	EKETNNTEKVDDWWETNKKS	ETNNTEKVDDWWETNKKSIW	NNTEKVDDWWETNKKSIWNA	TEKVDDWWETNKKSIWNAML	KVDDWWETNKKSIWNAMLCG	DDWWETNKKSIWNAMLCGYK	WWETNKKSIWNAMLCGYKKS	ETNKKSIWNAMLCGYKKSGN	NKKSIWNAMLCGYKKSGNKI	KSIWNAMLCGYKKSGNKIID	IWNAMLCGYKKSGNKIIDPS	NAMLCGYKKSGNKIIDPSWC	MLCGYKKSGNKIIDPSWCTI	CGYKKSGNKIIDPSWCTIPT	YKKSGNKIIDPSWCTIPTTE	KSGNKIIDPSWCTIPTTETP	GNKIIDPSWCTIPTTETPPQ	KIIDPSWCTIPTTETPPQFL	IDPSWCTIPTTETPPQFLRW	PSWCTIPTTETPPQFLRWIK	WCTIPTTETPPQFLRWIKEW	TIPTTETPPQFLRWIKEWGT	PTTETPPQFLRWIKEWGTNV	TETPPQFLRWIKEWGTNVCI	TPPQFLRWIKEWGTNVCIQK	PQFLRWIKEWGTNVCIQKEE	FLRWIKEWGTNVCIQKEEHK	RWIKEWGTNVCIQKEEHKEY	IKEWGTNVCIQKEEHKEYVK	EWGTNVCIQKEEHKEYVKSK	GTNVCIQKEEHKEYVKSKCS	NVCIQKEEHKEYVKSKCSNV	CIQKEEHKEYVKSKCSNVTN	QKEEHKEYVKSKCSNVTNLG	EEHKEYVKSKCSNVTNLGAQ	HKEYVKSKCSNVTNLGAQES	EYVKSKCSNVTNLGAQESES	VKSKCSNVTNLGAQESESKN	SKCSNVTNLGAQESESKNCT
116	G	MLTNIQFKDIKRKLDRLLEK	TNIQFKDIKRKLDRLLEKET	IQFKDIKRKLDRLLEKETNN	FKDIKRKLDRLLEKETNNTE	DIKRKLDRLLEKETNNTEKV	KRKLDRLLEKETNNTEKVDD	KLDRLLEKETNNTEKVDDWW	DRLLEKETNNTEKVDDWWET	LLEKETNNTEKVDDWWETNK	EKETNNTEKVDDWWETNKKS	ETNNTEKVDDWWETNKKSIW	NNTEKVDDWWETNKKSIWNA	TEKVDDWWETNKKSIWNAML	KVDDWWETNKKSIWNAMLCG	DDWWETNKKSIWNAMLCGYK	WWETNKKSIWNAMLCGYKKS	ETNKKSIWNAMLCGYKKSGN	NKKSIWNAMLCGYKKSGNKI	KSIWNAMLCGYKKSGNKIID	IWNAMLCGYKKSGNKIIDPS	NAMLCGYKKSGNKIIDPSWC	MLCGYKKSGNKIIDPSWCTI	CGYKKSGNKIIDPSWCTIPT	YKKSGNKIIDPSWCTIPTTE	KSGNKIIDPSWCTIPTTETP	GNKIIDPSWCTIPTTETPPQ	KIIDPSWCTIPTTETPPQFL	IDPSWCTIPTTETPPQFLRW	PSWCTIPTTETPPQFLRWIK	WCTIPTTETPPQFLRWIKEW	TIPTTETPPQFLRWIKEWGT	PTTETPPQFLRWIKEWGTNV	TETPPQFLRWIKEWGTNVCI	TPPQFLRWIKEWGTNVCIQK	PQFLRWIKEWGTNVCIQKEE	FLRWIKEWGTNVCIQKEEHK	RWIKEWGTNVCIQKEEHKEY	IKEWGTNVCIQKEEHKEYVK	EWGTNVCIQKEEHKEYVKSK	GTNVCIQKEEHKEYVKSKCS	NVCIQKEEHKEYVKSKCSNV	CIQKEEHKEYVKSKCSNVTN	QKEEHKEYVKSKCSNVTNLG	EEHKEYVKSKCSNVTNLGAQ	HKEYVKSKCSNVTNLGAQES	EYVKSKCSNVTNLGAQESES	VKSKCSNVTNLGAQESESKN	SKCSNVTNLGAQESESKNCT
117	YPYDVPDYAG	AISEGYKKYKGMDEFKNTFK	SEGYKKYKGMDEFKNTFKNI	GYKKYKGMDEFKNTFKNIKE	KKYKGMDEFKNTFKNIKEPD	YKGMDEFKNTFKNIKEPDAN	GMDEFKNTFKNIKEPDANEP	DEFKNTFKNIKEPDANEPNA	FKNTFKNIKEPDANEPNANE	NTFKNIKEPDANEPNANEYL	FKNIKEPDANEPNANEYLKK	NIKEPDANEPNANEYLKKHC	KEPDANEPNANEYLKKHCSK	PDANEPNANEYLKKHCSKCP	ANEPNANEYLKKHCSKCPCG	EPNANEYLKKHCSKCPCGFN	NANEYLKKHCSKCPCGFNDM	NEYLKKHCSKCPCGFNDMQE	YLKKHCSKCPCGFNDMQEIT	KKHCSKCPCGFNDMQEITKY	HCSKCPCGFNDMQEITKYTN	SKCPCGFNDMQEITKYTNIG	CPCGFNDMQEITKYTNIGNE	CGFNDMQEITKYTNIGNEAF	FNDMQEITKYTNIGNEAFKQ	DMQEITKYTNIGNEAFKQIK	QEITKYTNIGNEAFKQIKEQ	ITKYTNIGNEAFKQIKEQVD	KYTNIGNEAFKQIKEQVDIP	TNIGNEAFKQIKEQVDIPAE	IGNEAFKQIKEQVDIPAELE	NEAFKQIKEQVDIPAELEDV	AFKQIKEQVDIPAELEDVIY	KQIKEQVDIPAELEDVIYRL	IKEQVDIPAELEDVIYRLKH	EQVDIPAELEDVIYRLKHHE	VDIPAELEDVIYRLKHHEYD	IPAELEDVIYRLKHHEYDKG	AELEDVIYRLKHHEYDKGND	LEDVIYRLKHHEYDKGNDYI	DVIYRLKHHEYDKGNDYICN	IYRLKHHEYDKGNDYICNKY	RLKHHEYDKGNDYICNKYKN	KHHEYDKGNDYICNKYKNIN	HEYDKGNDYICNKYKNINVN	YDKGNDYICNKYKNINVNMK	KGNDYICNKYKNINVNMKKN	NDYICNKYKNINVNMKKNND	YICNKYKNINVNMKKNNDDT
118	G	AISEGYKKYKGMDEFKNTFK	SEGYKKYKGMDEFKNTFKNI	GYKKYKGMDEFKNTFKNIKE	KKYKGMDEFKNTFKNIKEPD	YKGMDEFKNTFKNIKEPDAN	GMDEFKNTFKNIKEPDANEP	DEFKNTFKNIKEPDANEPNA	FKNTFKNIKEPDANEPNANE	NTFKNIKEPDANEPNANEYL	FKNIKEPDANEPNANEYLKK	NIKEPDANEPNANEYLKKHC	KEPDANEPNANEYLKKHCSK	PDANEPNANEYLKKHCSKCP	ANEPNANEYLKKHCSKCPCG	EPNANEYLKKHCSKCPCGFN	NANEYLKKHCSKCPCGFNDM	NEYLKKHCSKCPCGFNDMQE	YLKKHCSKCPCGFNDMQEIT	KKHCSKCPCGFNDMQEITKY	HCSKCPCGFNDMQEITKYTN	SKCPCGFNDMQEITKYTNIG	CPCGFNDMQEITKYTNIGNE	CGFNDMQEITKYTNIGNEAF	FNDMQEITKYTNIGNEAFKQ	DMQEITKYTNIGNEAFKQIK	QEITKYTNIGNEAFKQIKEQ	ITKYTNIGNEAFKQIKEQVD	KYTNIGNEAFKQIKEQVDIP	TNIGNEAFKQIKEQVDIPAE	IGNEAFKQIKEQVDIPAELE	NEAFKQIKEQVDIPAELEDV	AFKQIKEQVDIPAELEDVIY	KQIKEQVDIPAELEDVIYRL	IKEQVDIPAELEDVIYRLKH	EQVDIPAELEDVIYRLKHHE	VDIPAELEDVIYRLKHHEYD	IPAELEDVIYRLKHHEYDKG	AELEDVIYRLKHHEYDKGND	LEDVIYRLKHHEYDKGNDYI	DVIYRLKHHEYDKGNDYICN	IYRLKHHEYDKGNDYICNKY	RLKHHEYDKGNDYICNKYKN	KHHEYDKGNDYICNKYKNIN	HEYDKGNDYICNKYKNINVN	YDKGNDYICNKYKNINVNMK	KGNDYICNKYKNINVNMKKN	NDYICNKYKNINVNMKKNND	YICNKYKNINVNMKKNNDDT
119	YPYDVPDYAG	PRRKNLFLKIDESDICKYKR	RKNLFLKIDESDICKYKRDP	NLFLKIDESDICKYKRDPKL	FLKIDESDICKYKRDPKLFK	KIDESDICKYKRDPKLFKDF	DESDICKYKRDPKLFKDFIY	SDICKYKRDPKLFKDFIYSS	ICKYKRDPKLFKDFIYSSAI	KYKRDPKLFKDFIYSSAISE	KRDPKLFKDFIYSSAISEVE	DPKLFKDFIYSSAISEVERL	KLFKDFIYSSAISEVERLKK	FKDFIYSSAISEVERLKKVY	DFIYSSAISEVERLKKVYGE	IYSSAISEVERLKKVYGEAK	SSAISEVERLKKVYGEAKTK	AISEVERLKKVYGEAKTKVV	SEVERLKKVYGEAKTKVVHA	VERLKKVYGEAKTKVVHAMK	RLKKVYGEAKTKVVHAMKYS	KKVYGEAKTKVVHAMKYSFA	VYGEAKTKVVHAMKYSFADI	GEAKTKVVHAMKYSFADIGS	AKTKVVHAMKYSFADIGSII	TKVVHAMKYSFADIGSIIKG	VVHAMKYSFADIGSIIKGDD	HAMKYSFADIGSIIKGDDMM	MKYSFADIGSIIKGDDMMEN	YSFADIGSIIKGDDMMENNS	FADIGSIIKGDDMMENNSSD	DIGSIIKGDDMMENNSSDKI	GSIIKGDDMMENNSSDKIGK	IIKGDDMMENNSSDKIGKIL	KGDDMMENNSSDKIGKILGD	DDMMENNSSDKIGKILGDGV	MMENNSSDKIGKILGDGVGQ	ENNSSDKIGKILGDGVGQNE	NSSDKIGKILGDGVGQNEKR	SDKIGKILGDGVGQNEKRKK	KIGKILGDGVGQNEKRKKWW	GKILGDGVGQNEKRKKWWDM	ILGDGVGQNEKRKKWWDMNK	GDGVGQNEKRKKWWDMNKYH	GVGQNEKRKKWWDMNKYHIW	GQNEKRKKWWDMNKYHIWES	NEKRKKWWDMNKYHIWESML	KRKKWWDMNKYHIWESMLCG	KKWWDMNKYHIWESMLCGYK
120	G	PRRKNLFLKIDESDICKYKR	RKNLFLKIDESDICKYKRDP	NLFLKIDESDICKYKRDPKL	FLKIDESDICKYKRDPKLFK	KIDESDICKYKRDPKLFKDF	DESDICKYKRDPKLFKDFIY	SDICKYKRDPKLFKDFIYSS	ICKYKRDPKLFKDFIYSSAI	KYKRDPKLFKDFIYSSAISE	KRDPKLFKDFIYSSAISEVE	DPKLFKDFIYSSAISEVERL	KLFKDFIYSSAISEVERLKK	FKDFIYSSAISEVERLKKVY	DFIYSSAISEVERLKKVYGE	IYSSAISEVERLKKVYGEAK	SSAISEVERLKKVYGEAKTK	AISEVERLKKVYGEAKTKVV	SEVERLKKVYGEAKTKVVHA	VERLKKVYGEAKTKVVHAMK	RLKKVYGEAKTKVVHAMKYS	KKVYGEAKTKVVHAMKYSFA	VYGEAKTKVVHAMKYSFADI	GEAKTKVVHAMKYSFADIGS	AKTKVVHAMKYSFADIGSII	TKVVHAMKYSFADIGSIIKG	VVHAMKYSFADIGSIIKGDD	HAMKYSFADIGSIIKGDDMM	MKYSFADIGSIIKGDDMMEN	YSFADIGSIIKGDDMMENNS	FADIGSIIKGDDMMENNSSD	DIGSIIKGDDMMENNSSDKI	GSIIKGDDMMENNSSDKIGK	IIKGDDMMENNSSDKIGKIL	KGDDMMENNSSDKIGKILGD	DDMMENNSSDKIGKILGDGV	MMENNSSDKIGKILGDGVGQ	ENNSSDKIGKILGDGVGQNE	NSSDKIGKILGDGVGQNEKR	SDKIGKILGDGVGQNEKRKK	KIGKILGDGVGQNEKRKKWW	GKILGDGVGQNEKRKKWWDM	ILGDGVGQNEKRKKWWDMNK	GDGVGQNEKRKKWWDMNKYH	GVGQNEKRKKWWDMNKYHIW	GQNEKRKKWWDMNKYHIWES	NEKRKKWWDMNKYHIWESML	KRKKWWDMNKYHIWESMLCG	KKWWDMNKYHIWESMLCGYK
121	YPYDVPDYAG	NDDEHQFLRWFQEWTENFCT	DEHQFLRWFQEWTENFCTKR	HQFLRWFQEWTENFCTKRNE	FLRWFQEWTENFCTKRNELY	RWFQEWTENFCTKRNELYEN	FQEWTENFCTKRNELYENMV	EWTENFCTKRNELYENMVTA	TENFCTKRNELYENMVTACN	NFCTKRNELYENMVTACNSA	CTKRNELYENMVTACNSAKC	KRNELYENMVTACNSAKCNT	NELYENMVTACNSAKCNTSN	LYENMVTACNSAKCNTSNGS	ENMVTACNSAKCNTSNGSVD	MVTACNSAKCNTSNGSVDKK	TACNSAKCNTSNGSVDKKEC	CNSAKCNTSNGSVDKKECTE	SAKCNTSNGSVDKKECTEAC	KCNTSNGSVDKKECTEACKN	NTSNGSVDKKECTEACKNYS	SNGSVDKKECTEACKNYSNF	GSVDKKECTEACKNYSNFIL	VDKKECTEACKNYSNFILIK	KKECTEACKNYSNFILIKKK	ECTEACKNYSNFILIKKKEY	TEACKNYSNFILIKKKEYQS	ACKNYSNFILIKKKEYQSLN	KNYSNFILIKKKEYQSLNSQ	YSNFILIKKKEYQSLNSQYD	NFILIKKKEYQSLNSQYDMN	ILIKKKEYQSLNSQYDMNYK	IKKKEYQSLNSQYDMNYKET	KKEYQSLNSQYDMNYKETKA	EYQSLNSQYDMNYKETKAEK	QSLNSQYDMNYKETKAEKKE	LNSQYDMNYKETKAEKKESP	SQYDMNYKETKAEKKESPEY	YDMNYKETKAEKKESPEYFK	MNYKETKAEKKESPEYFKDK	YKETKAEKKESPEYFKDKCN	ETKAEKKESPEYFKDKCNGE	KAEKKESPEYFKDKCNGECS	EKKESPEYFKDKCNGECSCL	KESPEYFKDKCNGECSCLSE	SPEYFKDKCNGECSCLSEYF	EYFKDKCNGECSCLSEYFKD	FKDKCNGECSCLSEYFKDET	DKCNGECSCLSEYFKDETRW
122	G	NDDEHQFLRWFQEWTENFCT	DEHQFLRWFQEWTENFCTKR	HQFLRWFQEWTENFCTKRNE	FLRWFQEWTENFCTKRNELY	RWFQEWTENFCTKRNELYEN	FQEWTENFCTKRNELYENMV	EWTENFCTKRNELYENMVTA	TENFCTKRNELYENMVTACN	NFCTKRNELYENMVTACNSA	CTKRNELYENMVTACNSAKC	KRNELYENMVTACNSAKCNT	NELYENMVTACNSAKCNTSN	LYENMVTACNSAKCNTSNGS	ENMVTACNSAKCNTSNGSVD	MVTACNSAKCNTSNGSVDKK	TACNSAKCNTSNGSVDKKEC	CNSAKCNTSNGSVDKKECTE	SAKCNTSNGSVDKKECTEAC	KCNTSNGSVDKKECTEACKN	NTSNGSVDKKECTEACKNYS	SNGSVDKKECTEACKNYSNF	GSVDKKECTEACKNYSNFIL	VDKKECTEACKNYSNFILIK	KKECTEACKNYSNFILIKKK	ECTEACKNYSNFILIKKKEY	TEACKNYSNFILIKKKEYQS	ACKNYSNFILIKKKEYQSLN	KNYSNFILIKKKEYQSLNSQ	YSNFILIKKKEYQSLNSQYD	NFILIKKKEYQSLNSQYDMN	ILIKKKEYQSLNSQYDMNYK	IKKKEYQSLNSQYDMNYKET	KKEYQSLNSQYDMNYKETKA	EYQSLNSQYDMNYKETKAEK	QSLNSQYDMNYKETKAEKKE	LNSQYDMNYKETKAEKKESP	SQYDMNYKETKAEKKESPEY	YDMNYKETKAEKKESPEYFK	MNYKETKAEKKESPEYFKDK	YKETKAEKKESPEYFKDKCN	ETKAEKKESPEYFKDKCNGE	KAEKKESPEYFKDKCNGECS	EKKESPEYFKDKCNGECSCL	KESPEYFKDKCNGECSCLSE	SPEYFKDKCNGECSCLSEYF	EYFKDKCNGECSCLSEYFKD	FKDKCNGECSCLSEYFKDET	DKCNGECSCLSEYFKDETRW
123	YPYDVPDYAG	KPPPPASNNTSDILQKTIPG	PPPASNNTSDILQKTIPGSG	PASNNTSDILQKTIPGSGSG	SNNTSDILQKTIPGSGSGSG
124	G	KPPPPASNNTSDILQKTIPG	PPPASNNTSDILQKTIPGSG	PASNNTSDILQKTIPGSGSG	SNNTSDILQKTIPGSGSGSG
125	YPYDVPDYAG	GSGSGSGTISSAIINHAFLQ	SGSGSGTISSAIINHAFLQN	GSGSGTISSAIINHAFLQNT	SGSGTISSAIINHAFLQNTV	GSGTISSAIINHAFLQNTVM	SGTISSAIINHAFLQNTVMK	GTISSAIINHAFLQNTVMKN	TISSAIINHAFLQNTVMKNC	ISSAIINHAFLQNTVMKNCN	SSAIINHAFLQNTVMKNCNY	SAIINHAFLQNTVMKNCNYK	AIINHAFLQNTVMKNCNYKR	IINHAFLQNTVMKNCNYKRK	INHAFLQNTVMKNCNYKRKR	NHAFLQNTVMKNCNYKRKRR	HAFLQNTVMKNCNYKRKRRE	AFLQNTVMKNCNYKRKRRER	FLQNTVMKNCNYKRKRRERD	LQNTVMKNCNYKRKRRERDW	QNTVMKNCNYKRKRRERDWD	NTVMKNCNYKRKRRERDWDC	TVMKNCNYKRKRRERDWDCN	VMKNCNYKRKRRERDWDCNT	MKNCNYKRKRRERDWDCNTK	KNCNYKRKRRERDWDCNTKK	NCNYKRKRRERDWDCNTKKD	CNYKRKRRERDWDCNTKKDV	NYKRKRRERDWDCNTKKDVC	YKRKRRERDWDCNTKKDVCI	KRKRRERDWDCNTKKDVCIP	RKRRERDWDCNTKKDVCIPD	KRRERDWDCNTKKDVCIPDR	RRERDWDCNTKKDVCIPDRR	RERDWDCNTKKDVCIPDRRY	ERDWDCNTKKDVCIPDRRYQ	RDWDCNTKKDVCIPDRRYQL	DWDCNTKKDVCIPDRRYQLC	WDCNTKKDVCIPDRRYQLCM	DCNTKKDVCIPDRRYQLCMK	CNTKKDVCIPDRRYQLCMKE	NTKKDVCIPDRRYQLCMKEL	TKKDVCIPDRRYQLCMKELT	KKDVCIPDRRYQLCMKELTN	KDVCIPDRRYQLCMKELTNL	DVCIPDRRYQLCMKELTNLV	VCIPDRRYQLCMKELTNLVN	CIPDRRYQLCMKELTNLVNN	IPDRRYQLCMKELTNLVNNT
126	G	GSGSGSGTISSAIINHAFLQ	SGSGSGTISSAIINHAFLQN	GSGSGTISSAIINHAFLQNT	SGSGTISSAIINHAFLQNTV	GSGTISSAIINHAFLQNTVM	SGTISSAIINHAFLQNTVMK	GTISSAIINHAFLQNTVMKN	TISSAIINHAFLQNTVMKNC	ISSAIINHAFLQNTVMKNCN	SSAIINHAFLQNTVMKNCNY	SAIINHAFLQNTVMKNCNYK	AIINHAFLQNTVMKNCNYKR	IINHAFLQNTVMKNCNYKRK	INHAFLQNTVMKNCNYKRKR	NHAFLQNTVMKNCNYKRKRR	HAFLQNTVMKNCNYKRKRRE	AFLQNTVMKNCNYKRKRRER	FLQNTVMKNCNYKRKRRERD	LQNTVMKNCNYKRKRRERDW	QNTVMKNCNYKRKRRERDWD	NTVMKNCNYKRKRRERDWDC	TVMKNCNYKRKRRERDWDCN	VMKNCNYKRKRRERDWDCNT	MKNCNYKRKRRERDWDCNTK	KNCNYKRKRRERDWDCNTKK	NCNYKRKRRERDWDCNTKKD	CNYKRKRRERDWDCNTKKDV	NYKRKRRERDWDCNTKKDVC	YKRKRRERDWDCNTKKDVCI	KRKRRERDWDCNTKKDVCIP	RKRRERDWDCNTKKDVCIPD	KRRERDWDCNTKKDVCIPDR	RRERDWDCNTKKDVCIPDRR	RERDWDCNTKKDVCIPDRRY	ERDWDCNTKKDVCIPDRRYQ	RDWDCNTKKDVCIPDRRYQL	DWDCNTKKDVCIPDRRYQLC	WDCNTKKDVCIPDRRYQLCM	DCNTKKDVCIPDRRYQLCMK	CNTKKDVCIPDRRYQLCMKE	NTKKDVCIPDRRYQLCMKEL	TKKDVCIPDRRYQLCMKELT	KKDVCIPDRRYQLCMKELTN	KDVCIPDRRYQLCMKELTNL	DVCIPDRRYQLCMKELTNLV	VCIPDRRYQLCMKELTNLVN	CIPDRRYQLCMKELTNLVNN	IPDRRYQLCMKELTNLVNNT
127	YPYDVPDYAG	TDTNFHRDITFRKLYLKRKL	DTNFHRDITFRKLYLKRKLI	TNFHRDITFRKLYLKRKLIY	NFHRDITFRKLYLKRKLIYD	FHRDITFRKLYLKRKLIYDA	HRDITFRKLYLKRKLIYDAA	RDITFRKLYLKRKLIYDAAV	DITFRKLYLKRKLIYDAAVE	ITFRKLYLKRKLIYDAAVEG	TFRKLYLKRKLIYDAAVEGD	FRKLYLKRKLIYDAAVEGDL	RKLYLKRKLIYDAAVEGDLL	KLYLKRKLIYDAAVEGDLLL	LYLKRKLIYDAAVEGDLLLK	YLKRKLIYDAAVEGDLLLKL	LKRKLIYDAAVEGDLLLKLN	KRKLIYDAAVEGDLLLKLNN	RKLIYDAAVEGDLLLKLNNY	KLIYDAAVEGDLLLKLNNYR	LIYDAAVEGDLLLKLNNYRY	IYDAAVEGDLLLKLNNYRYN	YDAAVEGDLLLKLNNYRYNK	DAAVEGDLLLKLNNYRYNKD	AAVEGDLLLKLNNYRYNKDF	AVEGDLLLKLNNYRYNKDFC	VEGDLLLKLNNYRYNKDFCK	EGDLLLKLNNYRYNKDFCKD	GDLLLKLNNYRYNKDFCKDI	DLLLKLNNYRYNKDFCKDIR	LLLKLNNYRYNKDFCKDIRW	LLKLNNYRYNKDFCKDIRWS	LKLNNYRYNKDFCKDIRWSL	KLNNYRYNKDFCKDIRWSLG	LNNYRYNKDFCKDIRWSLGD	NNYRYNKDFCKDIRWSLGDF	NYRYNKDFCKDIRWSLGDFG	YRYNKDFCKDIRWSLGDFGD	RYNKDFCKDIRWSLGDFGDI	YNKDFCKDIRWSLGDFGDII	NKDFCKDIRWSLGDFGDIIM	KDFCKDIRWSLGDFGDIIMG	DFCKDIRWSLGDFGDIIMGT	FCKDIRWSLGDFGDIIMGTD	CKDIRWSLGDFGDIIMGTDM	KDIRWSLGDFGDIIMGTDME	DIRWSLGDFGDIIMGTDMEG	IRWSLGDFGDIIMGTDMEGI	RWSLGDFGDIIMGTDMEGIG
128	G	TDTNFHRDITFRKLYLKRKL	DTNFHRDITFRKLYLKRKLI	TNFHRDITFRKLYLKRKLIY	NFHRDITFRKLYLKRKLIYD	FHRDITFRKLYLKRKLIYDA	HRDITFRKLYLKRKLIYDAA	RDITFRKLYLKRKLIYDAAV	DITFRKLYLKRKLIYDAAVE	ITFRKLYLKRKLIYDAAVEG	TFRKLYLKRKLIYDAAVEGD	FRKLYLKRKLIYDAAVEGDL	RKLYLKRKLIYDAAVEGDLL	KLYLKRKLIYDAAVEGDLLL	LYLKRKLIYDAAVEGDLLLK	YLKRKLIYDAAVEGDLLLKL	LKRKLIYDAAVEGDLLLKLN	KRKLIYDAAVEGDLLLKLNN	RKLIYDAAVEGDLLLKLNNY	KLIYDAAVEGDLLLKLNNYR	LIYDAAVEGDLLLKLNNYRY	IYDAAVEGDLLLKLNNYRYN	YDAAVEGDLLLKLNNYRYNK	DAAVEGDLLLKLNNYRYNKD	AAVEGDLLLKLNNYRYNKDF	AVEGDLLLKLNNYRYNKDFC	VEGDLLLKLNNYRYNKDFCK	EGDLLLKLNNYRYNKDFCKD	GDLLLKLNNYRYNKDFCKDI	DLLLKLNNYRYNKDFCKDIR	LLLKLNNYRYNKDFCKDIRW	LLKLNNYRYNKDFCKDIRWS	LKLNNYRYNKDFCKDIRWSL	KLNNYRYNKDFCKDIRWSLG	LNNYRYNKDFCKDIRWSLGD	NNYRYNKDFCKDIRWSLGDF	NYRYNKDFCKDIRWSLGDFG	YRYNKDFCKDIRWSLGDFGD	RYNKDFCKDIRWSLGDFGDI	YNKDFCKDIRWSLGDFGDII	NKDFCKDIRWSLGDFGDIIM	KDFCKDIRWSLGDFGDIIMG	DFCKDIRWSLGDFGDIIMGT	FCKDIRWSLGDFGDIIMGTD	CKDIRWSLGDFGDIIMGTDM	KDIRWSLGDFGDIIMGTDME	DIRWSLGDFGDIIMGTDMEG	IRWSLGDFGDIIMGTDMEGI	RWSLGDFGDIIMGTDMEGIG
129	YPYDVPDYAG	GYSKVVENNLRSIFGTDEKA	YSKVVENNLRSIFGTDEKAQ	SKVVENNLRSIFGTDEKAQQ	KVVENNLRSIFGTDEKAQQR	VVENNLRSIFGTDEKAQQRR	VENNLRSIFGTDEKAQQRRK	ENNLRSIFGTDEKAQQRRKQ	NNLRSIFGTDEKAQQRRKQW	NLRSIFGTDEKAQQRRKQWW	LRSIFGTDEKAQQRRKQWWN	RSIFGTDEKAQQRRKQWWNE	SIFGTDEKAQQRRKQWWNES	IFGTDEKAQQRRKQWWNESK	FGTDEKAQQRRKQWWNESKA	GTDEKAQQRRKQWWNESKAQ	TDEKAQQRRKQWWNESKAQI	DEKAQQRRKQWWNESKAQIW	EKAQQRRKQWWNESKAQIWT	KAQQRRKQWWNESKAQIWTA	AQQRRKQWWNESKAQIWTAM	QQRRKQWWNESKAQIWTAMM	QRRKQWWNESKAQIWTAMMY	RRKQWWNESKAQIWTAMMYS	RKQWWNESKAQIWTAMMYSV	KQWWNESKAQIWTAMMYSVK	QWWNESKAQIWTAMMYSVKK	WWNESKAQIWTAMMYSVKKR	WNESKAQIWTAMMYSVKKRL	NESKAQIWTAMMYSVKKRLK	ESKAQIWTAMMYSVKKRLKG	SKAQIWTAMMYSVKKRLKGN	KAQIWTAMMYSVKKRLKGNF	AQIWTAMMYSVKKRLKGNFI	QIWTAMMYSVKKRLKGNFIW	IWTAMMYSVKKRLKGNFIWI	WTAMMYSVKKRLKGNFIWIC	TAMMYSVKKRLKGNFIWICK	AMMYSVKKRLKGNFIWICKL	MMYSVKKRLKGNFIWICKLN	MYSVKKRLKGNFIWICKLNV	YSVKKRLKGNFIWICKLNVA	SVKKRLKGNFIWICKLNVAV	VKKRLKGNFIWICKLNVAVN	KKRLKGNFIWICKLNVAVNI	KRLKGNFIWICKLNVAVNIE	RLKGNFIWICKLNVAVNIEP	LKGNFIWICKLNVAVNIEPQ	KGNFIWICKLNVAVNIEPQI
130	G	GYSKVVENNLRSIFGTDEKA	YSKVVENNLRSIFGTDEKAQ	SKVVENNLRSIFGTDEKAQQ	KVVENNLRSIFGTDEKAQQR	VVENNLRSIFGTDEKAQQRR	VENNLRSIFGTDEKAQQRRK	ENNLRSIFGTDEKAQQRRKQ	NNLRSIFGTDEKAQQRRKQW	NLRSIFGTDEKAQQRRKQWW	LRSIFGTDEKAQQRRKQWWN	RSIFGTDEKAQQRRKQWWNE	SIFGTDEKAQQRRKQWWNES	IFGTDEKAQQRRKQWWNESK	FGTDEKAQQRRKQWWNESKA	GTDEKAQQRRKQWWNESKAQ	TDEKAQQRRKQWWNESKAQI	DEKAQQRRKQWWNESKAQIW	EKAQQRRKQWWNESKAQIWT	KAQQRRKQWWNESKAQIWTA	AQQRRKQWWNESKAQIWTAM	QQRRKQWWNESKAQIWTAMM	QRRKQWWNESKAQIWTAMMY	RRKQWWNESKAQIWTAMMYS	RKQWWNESKAQIWTAMMYSV	KQWWNESKAQIWTAMMYSVK	QWWNESKAQIWTAMMYSVKK	WWNESKAQIWTAMMYSVKKR	WNESKAQIWTAMMYSVKKRL	NESKAQIWTAMMYSVKKRLK	ESKAQIWTAMMYSVKKRLKG	SKAQIWTAMMYSVKKRLKGN	KAQIWTAMMYSVKKRLKGNF	AQIWTAMMYSVKKRLKGNFI	QIWTAMMYSVKKRLKGNFIW	IWTAMMYSVKKRLKGNFIWI	WTAMMYSVKKRLKGNFIWIC	TAMMYSVKKRLKGNFIWICK	AMMYSVKKRLKGNFIWICKL	MMYSVKKRLKGNFIWICKLN	MYSVKKRLKGNFIWICKLNV	YSVKKRLKGNFIWICKLNVA	SVKKRLKGNFIWICKLNVAV	VKKRLKGNFIWICKLNVAVN	KKRLKGNFIWICKLNVAVNI	KRLKGNFIWICKLNVAVNIE	RLKGNFIWICKLNVAVNIEP	LKGNFIWICKLNVAVNIEPQ	KGNFIWICKLNVAVNIEPQI
131	YPYDVPDYAG	IYRWIREWGRDYVSELPTEV	YRWIREWGRDYVSELPTEVQ	RWIREWGRDYVSELPTEVQK	WIREWGRDYVSELPTEVQKL	IREWGRDYVSELPTEVQKLK	REWGRDYVSELPTEVQKLKE	EWGRDYVSELPTEVQKLKEK	WGRDYVSELPTEVQKLKEKC	GRDYVSELPTEVQKLKEKCD	RDYVSELPTEVQKLKEKCDG	DYVSELPTEVQKLKEKCDGK	YVSELPTEVQKLKEKCDGKI	VSELPTEVQKLKEKCDGKIN	SELPTEVQKLKEKCDGKINY	ELPTEVQKLKEKCDGKINYT	LPTEVQKLKEKCDGKINYTD	PTEVQKLKEKCDGKINYTDK	TEVQKLKEKCDGKINYTDKK	EVQKLKEKCDGKINYTDKKV	VQKLKEKCDGKINYTDKKVC	QKLKEKCDGKINYTDKKVCK	KLKEKCDGKINYTDKKVCKV	LKEKCDGKINYTDKKVCKVP	KEKCDGKINYTDKKVCKVPP	EKCDGKINYTDKKVCKVPPC	KCDGKINYTDKKVCKVPPCQ	CDGKINYTDKKVCKVPPCQN	DGKINYTDKKVCKVPPCQNA	GKINYTDKKVCKVPPCQNAC	KINYTDKKVCKVPPCQNACK	INYTDKKVCKVPPCQNACKS	NYTDKKVCKVPPCQNACKSY	YTDKKVCKVPPCQNACKSYD	TDKKVCKVPPCQNACKSYDQ	DKKVCKVPPCQNACKSYDQW	KKVCKVPPCQNACKSYDQWI	KVCKVPPCQNACKSYDQWIT	VCKVPPCQNACKSYDQWITR	CKVPPCQNACKSYDQWITRK	KVPPCQNACKSYDQWITRKK	VPPCQNACKSYDQWITRKKN	PPCQNACKSYDQWITRKKNQ	PCQNACKSYDQWITRKKNQW	CQNACKSYDQWITRKKNQWD	QNACKSYDQWITRKKNQWDV	NACKSYDQWITRKKNQWDVL	ACKSYDQWITRKKNQWDVLS	CKSYDQWITRKKNQWDVLSN
132	G	IYRWIREWGRDYVSELPTEV	YRWIREWGRDYVSELPTEVQ	RWIREWGRDYVSELPTEVQK	WIREWGRDYVSELPTEVQKL	IREWGRDYVSELPTEVQKLK	REWGRDYVSELPTEVQKLKE	EWGRDYVSELPTEVQKLKEK	WGRDYVSELPTEVQKLKEKC	GRDYVSELPTEVQKLKEKCD	RDYVSELPTEVQKLKEKCDG	DYVSELPTEVQKLKEKCDGK	YVSELPTEVQKLKEKCDGKI	VSELPTEVQKLKEKCDGKIN	SELPTEVQKLKEKCDGKINY	ELPTEVQKLKEKCDGKINYT	LPTEVQKLKEKCDGKINYTD	PTEVQKLKEKCDGKINYTDK	TEVQKLKEKCDGKINYTDKK	EVQKLKEKCDGKINYTDKKV	VQKLKEKCDGKINYTDKKVC	QKLKEKCDGKINYTDKKVCK	KLKEKCDGKINYTDKKVCKV	LKEKCDGKINYTDKKVCKVP	KEKCDGKINYTDKKVCKVPP	EKCDGKINYTDKKVCKVPPC	KCDGKINYTDKKVCKVPPCQ	CDGKINYTDKKVCKVPPCQN	DGKINYTDKKVCKVPPCQNA	GKINYTDKKVCKVPPCQNAC	KINYTDKKVCKVPPCQNACK	INYTDKKVCKVPPCQNACKS	NYTDKKVCKVPPCQNACKSY	YTDKKVCKVPPCQNACKSYD	TDKKVCKVPPCQNACKSYDQ	DKKVCKVPPCQNACKSYDQW	KKVCKVPPCQNACKSYDQWI	KVCKVPPCQNACKSYDQWIT	VCKVPPCQNACKSYDQWITR	CKVPPCQNACKSYDQWITRK	KVPPCQNACKSYDQWITRKK	VPPCQNACKSYDQWITRKKN	PPCQNACKSYDQWITRKKNQ	PCQNACKSYDQWITRKKNQW	CQNACKSYDQWITRKKNQWD	QNACKSYDQWITRKKNQWDV	NACKSYDQWITRKKNQWDVL	ACKSYDQWITRKKNQWDVLS	CKSYDQWITRKKNQWDVLSN
133	YPYDVPDYAG	NKFISVKNAEKVQTAGIVTP	KFISVKNAEKVQTAGIVTPY	FISVKNAEKVQTAGIVTPYD	ISVKNAEKVQTAGIVTPYDI	SVKNAEKVQTAGIVTPYDIL	VKNAEKVQTAGIVTPYDILK	KNAEKVQTAGIVTPYDILKQ	NAEKVQTAGIVTPYDILKQE	AEKVQTAGIVTPYDILKQEL	EKVQTAGIVTPYDILKQELD	KVQTAGIVTPYDILKQELDE	VQTAGIVTPYDILKQELDEF	QTAGIVTPYDILKQELDEFN	TAGIVTPYDILKQELDEFNE	AGIVTPYDILKQELDEFNEV	GIVTPYDILKQELDEFNEVA	IVTPYDILKQELDEFNEVAF	VTPYDILKQELDEFNEVAFE	TPYDILKQELDEFNEVAFEN	PYDILKQELDEFNEVAFENE	YDILKQELDEFNEVAFENEI	DILKQELDEFNEVAFENEIN	ILKQELDEFNEVAFENEINK	LKQELDEFNEVAFENEINKR	KQELDEFNEVAFENEINKRD	QELDEFNEVAFENEINKRDG	ELDEFNEVAFENEINKRDGA	LDEFNEVAFENEINKRDGAY	DEFNEVAFENEINKRDGAYI	EFNEVAFENEINKRDGAYIE	FNEVAFENEINKRDGAYIEL	NEVAFENEINKRDGAYIELC	EVAFENEINKRDGAYIELCV	VAFENEINKRDGAYIELCVC	AFENEINKRDGAYIELCVCS	FENEINKRDGAYIELCVCSV	ENEINKRDGAYIELCVCSVE	NEINKRDGAYIELCVCSVEE	EINKRDGAYIELCVCSVEEA	INKRDGAYIELCVCSVEEAK	NKRDGAYIELCVCSVEEAKK	KRDGAYIELCVCSVEEAKKN	RDGAYIELCVCSVEEAKKNT	DGAYIELCVCSVEEAKKNTQ	GAYIELCVCSVEEAKKNTQE	AYIELCVCSVEEAKKNTQEV	YIELCVCSVEEAKKNTQEVV	IELCVCSVEEAKKNTQEVVT
134	G	NKFISVKNAEKVQTAGIVTP	KFISVKNAEKVQTAGIVTPY	FISVKNAEKVQTAGIVTPYD	ISVKNAEKVQTAGIVTPYDI	SVKNAEKVQTAGIVTPYDIL	VKNAEKVQTAGIVTPYDILK	KNAEKVQTAGIVTPYDILKQ	NAEKVQTAGIVTPYDILKQE	AEKVQTAGIVTPYDILKQEL	EKVQTAGIVTPYDILKQELD	KVQTAGIVTPYDILKQELDE	VQTAGIVTPYDILKQELDEF	QTAGIVTPYDILKQELDEFN	TAGIVTPYDILKQELDEFNE	AGIVTPYDILKQELDEFNEV	GIVTPYDILKQELDEFNEVA	IVTPYDILKQELDEFNEVAF	VTPYDILKQELDEFNEVAFE	TPYDILKQELDEFNEVAFEN	PYDILKQELDEFNEVAFENE	YDILKQELDEFNEVAFENEI	DILKQELDEFNEVAFENEIN	ILKQELDEFNEVAFENEINK	LKQELDEFNEVAFENEINKR	KQELDEFNEVAFENEINKRD	QELDEFNEVAFENEINKRDG	ELDEFNEVAFENEINKRDGA	LDEFNEVAFENEINKRDGAY	DEFNEVAFENEINKRDGAYI	EFNEVAFENEINKRDGAYIE	FNEVAFENEINKRDGAYIEL	NEVAFENEINKRDGAYIELC	EVAFENEINKRDGAYIELCV	VAFENEINKRDGAYIELCVC	AFENEINKRDGAYIELCVCS	FENEINKRDGAYIELCVCSV	ENEINKRDGAYIELCVCSVE	NEINKRDGAYIELCVCSVEE	EINKRDGAYIELCVCSVEEA	INKRDGAYIELCVCSVEEAK	NKRDGAYIELCVCSVEEAKK	KRDGAYIELCVCSVEEAKKN	RDGAYIELCVCSVEEAKKNT	DGAYIELCVCSVEEAKKNTQ	GAYIELCVCSVEEAKKNTQE	AYIELCVCSVEEAKKNTQEV	YIELCVCSVEEAKKNTQEVV	IELCVCSVEEAKKNTQEVVT
135	YPYDVPDYAG	GSGSGSGFSDTSLISGCNAK	SGSGSGFSDTSLISGCNAKR	GSGSGFSDTSLISGCNAKRE	SGSGFSDTSLISGCNAKRER	GSGFSDTSLISGCNAKRERE	SGFSDTSLISGCNAKREREK	GFSDTSLISGCNAKREREKW	FSDTSLISGCNAKREREKWY	SDTSLISGCNAKREREKWYC	DTSLISGCNAKREREKWYCN	TSLISGCNAKREREKWYCNL	SLISGCNAKREREKWYCNLN	LISGCNAKREREKWYCNLNG	ISGCNAKREREKWYCNLNGV	SGCNAKREREKWYCNLNGVQ	GCNAKREREKWYCNLNGVQE	CNAKREREKWYCNLNGVQEQ	NAKREREKWYCNLNGVQEQD	AKREREKWYCNLNGVQEQDI	KREREKWYCNLNGVQEQDIC	REREKWYCNLNGVQEQDICI	EREKWYCNLNGVQEQDICIP	REKWYCNLNGVQEQDICIPD	EKWYCNLNGVQEQDICIPDR	KWYCNLNGVQEQDICIPDRR	WYCNLNGVQEQDICIPDRRA	YCNLNGVQEQDICIPDRRAQ	CNLNGVQEQDICIPDRRAQM	NLNGVQEQDICIPDRRAQMC	LNGVQEQDICIPDRRAQMCI	NGVQEQDICIPDRRAQMCIN	GVQEQDICIPDRRAQMCINN	VQEQDICIPDRRAQMCINNL	QEQDICIPDRRAQMCINNLV	EQDICIPDRRAQMCINNLVN	QDICIPDRRAQMCINNLVNV	DICIPDRRAQMCINNLVNVK	ICIPDRRAQMCINNLVNVKS	CIPDRRAQMCINNLVNVKSG	IPDRRAQMCINNLVNVKSGN	PDRRAQMCINNLVNVKSGNE	DRRAQMCINNLVNVKSGNEK	RRAQMCINNLVNVKSGNEKN	RAQMCINNLVNVKSGNEKND	AQMCINNLVNVKSGNEKNDL	QMCINNLVNVKSGNEKNDLK	MCINNLVNVKSGNEKNDLKE	CINNLVNVKSGNEKNDLKEQ
136	G	GSGSGSGFSDTSLISGCNAK	SGSGSGFSDTSLISGCNAKR	GSGSGFSDTSLISGCNAKRE	SGSGFSDTSLISGCNAKRER	GSGFSDTSLISGCNAKRERE	SGFSDTSLISGCNAKREREK	GFSDTSLISGCNAKREREKW	FSDTSLISGCNAKREREKWY	SDTSLISGCNAKREREKWYC	DTSLISGCNAKREREKWYCN	TSLISGCNAKREREKWYCNL	SLISGCNAKREREKWYCNLN	LISGCNAKREREKWYCNLNG	ISGCNAKREREKWYCNLNGV	SGCNAKREREKWYCNLNGVQ	GCNAKREREKWYCNLNGVQE	CNAKREREKWYCNLNGVQEQ	NAKREREKWYCNLNGVQEQD	AKREREKWYCNLNGVQEQDI	KREREKWYCNLNGVQEQDIC	REREKWYCNLNGVQEQDICI	EREKWYCNLNGVQEQDICIP	REKWYCNLNGVQEQDICIPD	EKWYCNLNGVQEQDICIPDR	KWYCNLNGVQEQDICIPDRR	WYCNLNGVQEQDICIPDRRA	YCNLNGVQEQDICIPDRRAQ	CNLNGVQEQDICIPDRRAQM	NLNGVQEQDICIPDRRAQMC	LNGVQEQDICIPDRRAQMCI	NGVQEQDICIPDRRAQMCIN	GVQEQDICIPDRRAQMCINN	VQEQDICIPDRRAQMCINNL	QEQDICIPDRRAQMCINNLV	EQDICIPDRRAQMCINNLVN	QDICIPDRRAQMCINNLVNV	DICIPDRRAQMCINNLVNVK	ICIPDRRAQMCINNLVNVKS	CIPDRRAQMCINNLVNVKSG	IPDRRAQMCINNLVNVKSGN	PDRRAQMCINNLVNVKSGNE	DRRAQMCINNLVNVKSGNEK	RRAQMCINNLVNVKSGNEKN	RAQMCINNLVNVKSGNEKND	AQMCINNLVNVKSGNEKNDL	QMCINNLVNVKSGNEKNDLK	MCINNLVNVKSGNEKNDLKE	CINNLVNVKSGNEKNDLKEQ
137	YPYDVPDYAG	QVLLSLNTESQLLFNKWKKH	VLLSLNTESQLLFNKWKKHN	LLSLNTESQLLFNKWKKHNS	LSLNTESQLLFNKWKKHNSF	SLNTESQLLFNKWKKHNSFN	LNTESQLLFNKWKKHNSFNN	NTESQLLFNKWKKHNSFNNE	TESQLLFNKWKKHNSFNNEE	ESQLLFNKWKKHNSFNNEEF	SQLLFNKWKKHNSFNNEEFC	QLLFNKWKKHNSFNNEEFCN	LLFNKWKKHNSFNNEEFCND	LFNKWKKHNSFNNEEFCNDL	FNKWKKHNSFNNEEFCNDLN	NKWKKHNSFNNEEFCNDLNR	KWKKHNSFNNEEFCNDLNRD	WKKHNSFNNEEFCNDLNRDY	KKHNSFNNEEFCNDLNRDYA	KHNSFNNEEFCNDLNRDYAD	HNSFNNEEFCNDLNRDYADF	NSFNNEEFCNDLNRDYADFG	SFNNEEFCNDLNRDYADFGN	FNNEEFCNDLNRDYADFGNL	NNEEFCNDLNRDYADFGNLI	NEEFCNDLNRDYADFGNLIK	EEFCNDLNRDYADFGNLIKG	EFCNDLNRDYADFGNLIKGT	FCNDLNRDYADFGNLIKGTD	CNDLNRDYADFGNLIKGTDI	NDLNRDYADFGNLIKGTDIV	DLNRDYADFGNLIKGTDIVA	LNRDYADFGNLIKGTDIVAH	NRDYADFGNLIKGTDIVAHG	RDYADFGNLIKGTDIVAHGN	DYADFGNLIKGTDIVAHGNS	YADFGNLIKGTDIVAHGNSK	ADFGNLIKGTDIVAHGNSKE	DFGNLIKGTDIVAHGNSKEV	FGNLIKGTDIVAHGNSKEVE	GNLIKGTDIVAHGNSKEVED	NLIKGTDIVAHGNSKEVEDK	LIKGTDIVAHGNSKEVEDKL	IKGTDIVAHGNSKEVEDKLK	KGTDIVAHGNSKEVEDKLKQ	GTDIVAHGNSKEVEDKLKQI	TDIVAHGNSKEVEDKLKQIF	DIVAHGNSKEVEDKLKQIFG	IVAHGNSKEVEDKLKQIFGE
138	G	QVLLSLNTESQLLFNKWKKH	VLLSLNTESQLLFNKWKKHN	LLSLNTESQLLFNKWKKHNS	LSLNTESQLLFNKWKKHNSF	SLNTESQLLFNKWKKHNSFN	LNTESQLLFNKWKKHNSFNN	NTESQLLFNKWKKHNSFNNE	TESQLLFNKWKKHNSFNNEE	ESQLLFNKWKKHNSFNNEEF	SQLLFNKWKKHNSFNNEEFC	QLLFNKWKKHNSFNNEEFCN	LLFNKWKKHNSFNNEEFCND	LFNKWKKHNSFNNEEFCNDL	FNKWKKHNSFNNEEFCNDLN	NKWKKHNSFNNEEFCNDLNR	KWKKHNSFNNEEFCNDLNRD	WKKHNSFNNEEFCNDLNRDY	KKHNSFNNEEFCNDLNRDYA	KHNSFNNEEFCNDLNRDYAD	HNSFNNEEFCNDLNRDYADF	NSFNNEEFCNDLNRDYADFG	SFNNEEFCNDLNRDYADFGN	FNNEEFCNDLNRDYADFGNL	NNEEFCNDLNRDYADFGNLI	NEEFCNDLNRDYADFGNLIK	EEFCNDLNRDYADFGNLIKG	EFCNDLNRDYADFGNLIKGT	FCNDLNRDYADFGNLIKGTD	CNDLNRDYADFGNLIKGTDI	NDLNRDYADFGNLIKGTDIV	DLNRDYADFGNLIKGTDIVA	LNRDYADFGNLIKGTDIVAH	NRDYADFGNLIKGTDIVAHG	RDYADFGNLIKGTDIVAHGN	DYADFGNLIKGTDIVAHGNS	YADFGNLIKGTDIVAHGNSK	ADFGNLIKGTDIVAHGNSKE	DFGNLIKGTDIVAHGNSKEV	FGNLIKGTDIVAHGNSKEVE	GNLIKGTDIVAHGNSKEVED	NLIKGTDIVAHGNSKEVEDK	LIKGTDIVAHGNSKEVEDKL	IKGTDIVAHGNSKEVEDKLK	KGTDIVAHGNSKEVEDKLKQ	GTDIVAHGNSKEVEDKLKQI	TDIVAHGNSKEVEDKLKQIF	DIVAHGNSKEVEDKLKQIFG	IVAHGNSKEVEDKLKQIFGE
139	YPYDVPDYAG	ENENAKSDREKWWNDNKEEF	NENAKSDREKWWNDNKEEFW	ENAKSDREKWWNDNKEEFWN	NAKSDREKWWNDNKEEFWNK	AKSDREKWWNDNKEEFWNKL	KSDREKWWNDNKEEFWNKLL	SDREKWWNDNKEEFWNKLLS	DREKWWNDNKEEFWNKLLSS	REKWWNDNKEEFWNKLLSSV	EKWWNDNKEEFWNKLLSSVK	KWWNDNKEEFWNKLLSSVKG	WWNDNKEEFWNKLLSSVKGK	WNDNKEEFWNKLLSSVKGKG	NDNKEEFWNKLLSSVKGKGK	DNKEEFWNKLLSSVKGKGKE	NKEEFWNKLLSSVKGKGKEG	KEEFWNKLLSSVKGKGKEGN	EEFWNKLLSSVKGKGKEGNV	EFWNKLLSSVKGKGKEGNVE	FWNKLLSSVKGKGKEGNVEI	WNKLLSSVKGKGKEGNVEIK	NKLLSSVKGKGKEGNVEIKE	KLLSSVKGKGKEGNVEIKEC	LLSSVKGKGKEGNVEIKECT	LSSVKGKGKEGNVEIKECTK	SSVKGKGKEGNVEIKECTKD	SVKGKGKEGNVEIKECTKDA	VKGKGKEGNVEIKECTKDAT	KGKGKEGNVEIKECTKDATL	GKGKEGNVEIKECTKDATLE	KGKEGNVEIKECTKDATLEE	GKEGNVEIKECTKDATLEEI	KEGNVEIKECTKDATLEEIP	EGNVEIKECTKDATLEEIPQ	GNVEIKECTKDATLEEIPQF	NVEIKECTKDATLEEIPQFQ	VEIKECTKDATLEEIPQFQR	EIKECTKDATLEEIPQFQRW	IKECTKDATLEEIPQFQRWV	KECTKDATLEEIPQFQRWVQ	ECTKDATLEEIPQFQRWVQE	CTKDATLEEIPQFQRWVQEW	TKDATLEEIPQFQRWVQEWG	KDATLEEIPQFQRWVQEWGK	DATLEEIPQFQRWVQEWGKE	ATLEEIPQFQRWVQEWGKEY	TLEEIPQFQRWVQEWGKEYG	LEEIPQFQRWVQEWGKEYGE
140	G	ENENAKSDREKWWNDNKEEF	NENAKSDREKWWNDNKEEFW	ENAKSDREKWWNDNKEEFWN	NAKSDREKWWNDNKEEFWNK	AKSDREKWWNDNKEEFWNKL	KSDREKWWNDNKEEFWNKLL	SDREKWWNDNKEEFWNKLLS	DREKWWNDNKEEFWNKLLSS	REKWWNDNKEEFWNKLLSSV	EKWWNDNKEEFWNKLLSSVK	KWWNDNKEEFWNKLLSSVKG	WWNDNKEEFWNKLLSSVKGK	WNDNKEEFWNKLLSSVKGKG	NDNKEEFWNKLLSSVKGKGK	DNKEEFWNKLLSSVKGKGKE	NKEEFWNKLLSSVKGKGKEG	KEEFWNKLLSSVKGKGKEGN	EEFWNKLLSSVKGKGKEGNV	EFWNKLLSSVKGKGKEGNVE	FWNKLLSSVKGKGKEGNVEI	WNKLLSSVKGKGKEGNVEIK	NKLLSSVKGKGKEGNVEIKE	KLLSSVKGKGKEGNVEIKEC	LLSSVKGKGKEGNVEIKECT	LSSVKGKGKEGNVEIKECTK	SSVKGKGKEGNVEIKECTKD	SVKGKGKEGNVEIKECTKDA	VKGKGKEGNVEIKECTKDAT	KGKGKEGNVEIKECTKDATL	GKGKEGNVEIKECTKDATLE	KGKEGNVEIKECTKDATLEE	GKEGNVEIKECTKDATLEEI	KEGNVEIKECTKDATLEEIP	EGNVEIKECTKDATLEEIPQ	GNVEIKECTKDATLEEIPQF	NVEIKECTKDATLEEIPQFQ	VEIKECTKDATLEEIPQFQR	EIKECTKDATLEEIPQFQRW	IKECTKDATLEEIPQFQRWV	KECTKDATLEEIPQFQRWVQ	ECTKDATLEEIPQFQRWVQE	CTKDATLEEIPQFQRWVQEW	TKDATLEEIPQFQRWVQEWG	KDATLEEIPQFQRWVQEWGK	DATLEEIPQFQRWVQEWGKE	ATLEEIPQFQRWVQEWGKEY	TLEEIPQFQRWVQEWGKEYG	LEEIPQFQRWVQEWGKEYGE
141	YPYDVPDYAG	EERPKKLQNLEGICKEKNGL	ERPKKLQNLEGICKEKNGLL	RPKKLQNLEGICKEKNGLLN	PKKLQNLEGICKEKNGLLNE	KKLQNLEGICKEKNGLLNEN	KLQNLEGICKEKNGLLNENR	LQNLEGICKEKNGLLNENRC	QNLEGICKEKNGLLNENRCN	NLEGICKEKNGLLNENRCNN	LEGICKEKNGLLNENRCNNE	EGICKEKNGLLNENRCNNEH	GICKEKNGLLNENRCNNEHE	ICKEKNGLLNENRCNNEHEC	CKEKNGLLNENRCNNEHECK	KEKNGLLNENRCNNEHECKR	EKNGLLNENRCNNEHECKRT	KNGLLNENRCNNEHECKRTC	NGLLNENRCNNEHECKRTCT	GLLNENRCNNEHECKRTCTA	LLNENRCNNEHECKRTCTAY	LNENRCNNEHECKRTCTAYE	NENRCNNEHECKRTCTAYES	ENRCNNEHECKRTCTAYESW	NRCNNEHECKRTCTAYESWI	RCNNEHECKRTCTAYESWII	CNNEHECKRTCTAYESWIIL	NNEHECKRTCTAYESWIILK	NEHECKRTCTAYESWIILKK	EHECKRTCTAYESWIILKKE	HECKRTCTAYESWIILKKEQ	ECKRTCTAYESWIILKKEQW	CKRTCTAYESWIILKKEQWD	KRTCTAYESWIILKKEQWDT	RTCTAYESWIILKKEQWDTI	TCTAYESWIILKKEQWDTIS	CTAYESWIILKKEQWDTISK	TAYESWIILKKEQWDTISKK	AYESWIILKKEQWDTISKKY	YESWIILKKEQWDTISKKYD	ESWIILKKEQWDTISKKYDI	SWIILKKEQWDTISKKYDIV	WIILKKEQWDTISKKYDIVK	IILKKEQWDTISKKYDIVKD	ILKKEQWDTISKKYDIVKDD	LKKEQWDTISKKYDIVKDDE	KKEQWDTISKKYDIVKDDEK	KEQWDTISKKYDIVKDDEKY	EQWDTISKKYDIVKDDEKYV
142	G	EERPKKLQNLEGICKEKNGL	ERPKKLQNLEGICKEKNGLL	RPKKLQNLEGICKEKNGLLN	PKKLQNLEGICKEKNGLLNE	KKLQNLEGICKEKNGLLNEN	KLQNLEGICKEKNGLLNENR	LQNLEGICKEKNGLLNENRC	QNLEGICKEKNGLLNENRCN	NLEGICKEKNGLLNENRCNN	LEGICKEKNGLLNENRCNNE	EGICKEKNGLLNENRCNNEH	GICKEKNGLLNENRCNNEHE	ICKEKNGLLNENRCNNEHEC	CKEKNGLLNENRCNNEHECK	KEKNGLLNENRCNNEHECKR	EKNGLLNENRCNNEHECKRT	KNGLLNENRCNNEHECKRTC	NGLLNENRCNNEHECKRTCT	GLLNENRCNNEHECKRTCTA	LLNENRCNNEHECKRTCTAY	LNENRCNNEHECKRTCTAYE	NENRCNNEHECKRTCTAYES	ENRCNNEHECKRTCTAYESW	NRCNNEHECKRTCTAYESWI	RCNNEHECKRTCTAYESWII	CNNEHECKRTCTAYESWIIL	NNEHECKRTCTAYESWIILK	NEHECKRTCTAYESWIILKK	EHECKRTCTAYESWIILKKE	HECKRTCTAYESWIILKKEQ	ECKRTCTAYESWIILKKEQW	CKRTCTAYESWIILKKEQWD	KRTCTAYESWIILKKEQWDT	RTCTAYESWIILKKEQWDTI	TCTAYESWIILKKEQWDTIS	CTAYESWIILKKEQWDTISK	TAYESWIILKKEQWDTISKK	AYESWIILKKEQWDTISKKY	YESWIILKKEQWDTISKKYD	ESWIILKKEQWDTISKKYDI	SWIILKKEQWDTISKKYDIV	WIILKKEQWDTISKKYDIVK	IILKKEQWDTISKKYDIVKD	ILKKEQWDTISKKYDIVKDD	LKKEQWDTISKKYDIVKDDE	KKEQWDTISKKYDIVKDDEK	KEQWDTISKKYDIVKDDEKY	EQWDTISKKYDIVKDDEKYV
143	YPYDVPDYAG	VKKGSNETAMKFLNELCKEC	KKGSNETAMKFLNELCKECN	KGSNETAMKFLNELCKECNL	GSNETAMKFLNELCKECNLG	SNETAMKFLNELCKECNLGD	NETAMKFLNELCKECNLGDF	ETAMKFLNELCKECNLGDFE	TAMKFLNELCKECNLGDFEK	AMKFLNELCKECNLGDFEKI	MKFLNELCKECNLGDFEKII	KFLNELCKECNLGDFEKIIN	FLNELCKECNLGDFEKIINL	LNELCKECNLGDFEKIINLK	NELCKECNLGDFEKIINLKD	ELCKECNLGDFEKIINLKDD	LCKECNLGDFEKIINLKDDE	CKECNLGDFEKIINLKDDEY	KECNLGDFEKIINLKDDEYT	ECNLGDFEKIINLKDDEYTK	CNLGDFEKIINLKDDEYTKL	NLGDFEKIINLKDDEYTKLC	LGDFEKIINLKDDEYTKLCN	GDFEKIINLKDDEYTKLCNC	DFEKIINLKDDEYTKLCNCQ	FEKIINLKDDEYTKLCNCQV	EKIINLKDDEYTKLCNCQVG	KIINLKDDEYTKLCNCQVGS	IINLKDDEYTKLCNCQVGSG	INLKDDEYTKLCNCQVGSGS	NLKDDEYTKLCNCQVGSGSG	LKDDEYTKLCNCQVGSGSGS	KDDEYTKLCNCQVGSGSGSG
144	G	VKKGSNETAMKFLNELCKEC	KKGSNETAMKFLNELCKECN	KGSNETAMKFLNELCKECNL	GSNETAMKFLNELCKECNLG	SNETAMKFLNELCKECNLGD	NETAMKFLNELCKECNLGDF	ETAMKFLNELCKECNLGDFE	TAMKFLNELCKECNLGDFEK	AMKFLNELCKECNLGDFEKI	MKFLNELCKECNLGDFEKII	KFLNELCKECNLGDFEKIIN	FLNELCKECNLGDFEKIINL	LNELCKECNLGDFEKIINLK	NELCKECNLGDFEKIINLKD	ELCKECNLGDFEKIINLKDD	LCKECNLGDFEKIINLKDDE	CKECNLGDFEKIINLKDDEY	KECNLGDFEKIINLKDDEYT	ECNLGDFEKIINLKDDEYTK	CNLGDFEKIINLKDDEYTKL	NLGDFEKIINLKDDEYTKLC	LGDFEKIINLKDDEYTKLCN	GDFEKIINLKDDEYTKLCNC	DFEKIINLKDDEYTKLCNCQ	FEKIINLKDDEYTKLCNCQV	EKIINLKDDEYTKLCNCQVG	KIINLKDDEYTKLCNCQVGS	IINLKDDEYTKLCNCQVGSG	INLKDDEYTKLCNCQVGSGS	NLKDDEYTKLCNCQVGSGSG	LKDDEYTKLCNCQVGSGSGS	KDDEYTKLCNCQVGSGSGSG
	YPYDVPDYAG	G	YPYDVPDYAG	G	YPYDVPDYAG	G	YPYDVPDYAG	G	YPYDVPDYAG	G	YPYDVPDYAG	G	YPYDVPDYAG	G	YPYDVPDYAG	G	YPYDVPDYAG	G	YPYDVPDYAG	G	YPYDVPDYAG	G	YPYDVPDYAG	G	YPYDVPDYAG	G	YPYDVPDYAG	G	YPYDVPDYAG	G	YPYDVPDYAG	G	YPYDVPDYAG	G	YPYDVPDYAG	G	YPYDVPDYAG	G	YPYDVPDYAG	G	YPYDVPDYAG	G	YPYDVPDYAG	G	YPYDVPDYAG	G	YPYDVPDYAG	G	YPYDVPDYAG
[truncated: 19 more columns]

## Sheet: Intensity Map
Intensity Map Linear Epitope Mapping (PEP20215042037) - Mouse IgG 3D10
Microarray Content:	Erythrocyte membrane protein 1 (GenBank: AAQ73926.1), hypothetical protein PFNF54_03544 (GenBank: EWC87419.1), PvDBP and PvEBP2 elongated with neutral GSGSGSG linkers at the C- and N-terminus and converted into overlapping peptides
Sample:	Mouse IgG 3D10
Peptide Length:	20 aa
Peptide Overlap:	19 aa and 18 aa for hypothetical protein PFNF54_03544
Number of Peptides:	4593
Number of Spots:	9,186 (peptides printed in duplicate)
HA Controls:	YPYDVPDYAG	212 spots
Mouse IgG 3D10, 10 µg/ml		1	2	3	4	5	6	7	8	9	10	11	12	13	14	15	16	17	18	19	20	21	22	23	24	25	26	27	28	29	30	31	32	33	34	35	36	37	38	39	40	41	42	43	44	45	46	47	48
	YPYDVPDYAG	G	YPYDVPDYAG	G	YPYDVPDYAG	G	YPYDVPDYAG	G	YPYDVPDYAG	G	YPYDVPDYAG	G	YPYDVPDYAG	G	YPYDVPDYAG	G	YPYDVPDYAG	G	YPYDVPDYAG	G	YPYDVPDYAG	G	YPYDVPDYAG	G	YPYDVPDYAG	G	YPYDVPDYAG	G	YPYDVPDYAG	G	YPYDVPDYAG	G	YPYDVPDYAG	G	YPYDVPDYAG	G	YPYDVPDYAG	G	YPYDVPDYAG	G	YPYDVPDYAG	G	YPYDVPDYAG	G	YPYDVPDYAG	G	YPYDVPDYAG	G	YPYDVPDYAG
1	YPYDVPDYAG	0	0	0	0	0	1	0	0	0	3.75	0	0	0	0	0	0	0	0	0	0	0	0	0	0	0	0	0	0	0	0	0	0	0	0	0	0	0	0	0	0	0	0	0	0	0	0	0	0
2	G	0	0	0	0	0	1	0	0	0	3.75	0	0	0	0	0	0	0	0	0	0	0	0	0	0	0	0	0	0	0	0	0	0	0	0	0	0	0	0	0	0	0	0	0	0	0	0	0	0
3	YPYDVPDYAG	0	0	0	0	0	0	0	0	0	0	0	0	0	0	0	0	0	3	0	0	0	0	0	0	0	0	0	0	0	0	0	0	0	0	0	0	1	0	0	0	0	0	0	0	0	0	0	0
4	G	0	0	0	0	0	0	0	0	0	0	0	0	0	0	0	0	0	3	0	0	0	0	0	0	0	0	0	0	0	0	0	0	0	0	0	0	1	0	0	0	0	0	0	0	0	0	0	0
5	YPYDVPDYAG	0	0	0	0	0	0	0	0	0	0	0	0	0	0	0	0	0	0	0	0	2.5	0	0	0	0	0	0	0	0	0	0	1.5	0	0	2.5	0	0	0	0	0	1	0	0	0	0	100	0	4
6	G	0	0	0	0	0	0	0	0	0	0	0	0	0	0	0	0	0	0	0	0	2.5	0	0	0	0	0	0	0	0	0	0	1.5	0	0	2.5	0	0	0	0	0	1	0	0	0	0	100	0	4
7	YPYDVPDYAG	2216	125.75	82.25	0	93.75	0	0	0	0	0	0	1.5	0	0	0	0	0	0	0	0	0	0	1	0	0	0	0	0	0	0	4.25	0	0	0	0	0	0	0	0	0	0	0	0	0	0	0	0	0
8	G	2216	125.75	82.25	0	93.75	0	0	0	0	0	0	1.5	0	0	0	0	0	0	0	0	0	0	1	0	0	0	0	0	0	0	4.25	0	0	0	0	0	0	0	0	0	0	0	0	0	0	0	0	0
9	YPYDVPDYAG	0	0	0	0	0	0	0	0	0	0	0	0	0	0	0	0	0	1	1	0	0	0	0	0	0	0	2.5	0	0	0	0	0	0	0	0	0	0	0	0	0	1.5	0	0	0.75	0	0	0	0
10	G	0	0	0	0	0	0	0	0	0	0	0	0	0	0	0	0	0	1	1	0	0	0	0	0	0	0	2.5	0	0	0	0	0	0	0	0	0	0	0	0	0	1.5	0	0	0.75	0	0	0	0
11	YPYDVPDYAG	0	2.5	0	0	0	181.25	0	0	0	0	0	0	0	0	0	0	101.75	0	385	0	0	0	70.5	0	0	0	0	0	0	0	0	0	0	3	0	2.75	0	0	0	0	0	0	0	0	3.5	0	0	0
12	G	0	2.5	0	0	0	181.25	0	0	0	0	0	0	0	0	0	0	101.75	0	385	0	0	0	70.5	0	0	0	0	0	0	0	0	0	0	3	0	2.75	0	0	0	0	0	0	0	0	3.5	0	0	0
13	YPYDVPDYAG	0	0	0	0	0	0	0	0	0	0	0	0	0	0	0	0	0	0	0	0	0	0	0	0	0	0	0	0	0	0	9	0	0	0	2.5	0	0	0	0	0	0	0	0	0	0	0	0	0
14	G	0	0	0	0	0	0	0	0	0	0	0	0	0	0	0	0	0	0	0	0	0	0	0	0	0	0	0	0	0	0	9	0	0	0	2.5	0	0	0	0	0	0	0	0	0	0	0	0	0
15	YPYDVPDYAG	0	0	0	0	0	0	0	0	0	0	0	0	0	0	0	0	0	0	0	0	0	0	3	0	0	0	0	0	0	0	0	3	0	0	0	0	0	0	0	0	0	0	0	0	0	0	0	0
16	G	0	0	0	0	0	0	0	0	0	0	0	0	0	0	0	0	0	0	0	0	0	0	3	0	0	0	0	0	0	0	0	3	0	0	0	0	0	0	0	0	0	0	0	0	0	0	0	0
17	YPYDVPDYAG	0	1.5	0	0	0	81	0	98	91.5	0	0	83.5	93.5	145	156	139.5	107.25	0	1.5	0	0	0	0	0	0	0	0	0	0	0	0	0	0	0	0	0	0	0	0	0	0	0	0	0	0	0	0	0
18	G	0	1.5	0	0	0	81	0	98	91.5	0	0	83.5	93.5	145	156	139.5	107.25	0	1.5	0	0	0	0	0	0	0	0	0	0	0	0	0	0	0	0	0	0	0	0	0	0	0	0	0	0	0	0	0
19	YPYDVPDYAG	0	0	0	0	0	0	0	0	0	0	0	0	0	0	0	0	0	0	0	0	0	0	0	95.5	290.5	323	149.5	0	0	608.75	0	148	0	0	0	0	0	0	0	0	0	0	0	0	0	0	0	0
20	G	0	0	0	0	0	0	0	0	0	0	0	0	0	0	0	0	0	0	0	0	0	0	0	95.5	290.5	323	149.5	0	0	608.75	0	148	0	0	0	0	0	0	0	0	0	0	0	0	0	0	0	0
21	YPYDVPDYAG	0	0	0	0	0	0	0	0	0	0	0	0	0	0	0	0	0	80.25	425.5	811.5	104.25	235.75	97	0	0	0	0	0	0	0	0	0	0	0	0	0	0	0	0	0	0	0	0	0	0	0	0	0
22	G	0	0	0	0	0	0	0	0	0	0	0	0	0	0	0	0	0	80.25	425.5	811.5	104.25	235.75	97	0	0	0	0	0	0	0	0	0	0	0	0	0	0	0	0	0	0	0	0	0	0	0	0	0
23	YPYDVPDYAG	0	0	5	0	0	0	0	0	0	0	0	0	0	0	0	0	0	0	0	0.75	0	0	0	0	0	0	0	0	0	0	0	0	0	0	0	0	0	0	0	0	0	0	0	0	0	0	0	0
24	G	0	0	5	0	0	0	0	0	0	0	0	0	0	0	0	0	0	0	0	0.75	0	0	0	0	0	0	0	0	0	0	0	0	0	0	0	0	0	0	0	0	0	0	0	0	0	0	0	0
25	YPYDVPDYAG	0	0	0	0	0	0	93	901	230.5	92	0	0	0	0	0	0	0	0	0	0	0	0	0	0	0	0	0	0	0	5.25	0	0	5.5	0	0	0	336.5	0	0	813	721.75	109.75	0	0	0	0	96.75	93
26	G	0	0	0	0	0	0	93	901	230.5	92	0	0	0	0	0	0	0	0	0	0	0	0	0	0	0	0	0	0	0	5.25	0	0	5.5	0	0	0	336.5	0	0	813	721.75	109.75	0	0	0	0	96.75	93
27	YPYDVPDYAG	0	0	0	0	0	0	0	0	0	0	0	0	0	0	0	0	0	0	0	0	0	0	0	0	0	0	0	0	0	0	0	0	0	0	0	2	0	0	0	0	0	0	0	0	0	0	0	3.5
28	G	0	0	0	0	0	0	0	0	0	0	0	0	0	0	0	0	0	0	0	0	0	0	0	0	0	0	0	0	0	0	0	0	0	0	0	2	0	0	0	0	0	0	0	0	0	0	0	3.5
29	YPYDVPDYAG	0	0	0	0	0	0	0	0	0	0	0	0	0	0	0	0	0	0	0	0	0	0	0	0	0	0	0	0	0	0	0	0	0	0	0	2.5	0	0	0	0	0	0	0	0	0	0	0	0
30	G	0	0	0	0	0	0	0	0	0	0	0	0	0	0	0	0	0	0	0	0	0	0	0	0	0	0	0	0	0	0	0	0	0	0	0	2.5	0	0	0	0	0	0	0	0	0	0	0	0
31	YPYDVPDYAG	0	0	6.5	0	0	0	0	0	0	0	0	0	0	3	0	0	0	0	0	0	0	0	0	1.25	0	0	0	0	7	0	0	0	1.5	0	0	0	0	0	0	0	0	0	0	0	0	0	0	9
32	G	0	0	6.5	0	0	0	0	0	0	0	0	0	0	3	0	0	0	0	0	0	0	0	0	1.25	0	0	0	0	7	0	0	0	1.5	0	0	0	0	0	0	0	0	0	0	0	0	0	0	9
33	YPYDVPDYAG	0	0	0	0	0	0	0	0	0	0	0	0	0	0	0	0	0	0	0	0	0	0	0	0	0	0	0	0	2.5	0	0	0	0	0	0	0	0	0	0	0	0	0	0	0	0	0	0	0
34	G	0	0	0	0	0	0	0	0	0	0	0	0	0	0	0	0	0	0	0	0	0	0	0	0	0	0	0	0	2.5	0	0	0	0	0	0	0	0	0	0	0	0	0	0	0	0	0	0	0
35	YPYDVPDYAG	0	0	0	0	0	0	0	0	0	0	3	0	0	0	0	0	0	0	0	0	0	0	0	0	0	0	0	0	0	0	0	0	0	0	0	0	0	0	2.5	0	0	0	0	0	0	0	0	0.75
36	G	0	0	0	0	0	0	0	0	0	0	3	0	0	0	0	0	0	0	0	0	0	0	0	0	0	0	0	0	0	0	0	0	0	0	0	0	0	0	2.5	0	0	0	0	0	0	0	0	0.75
37	YPYDVPDYAG	0	0	0	0	0	0	0	0	0	0	0	0	0	1	0	0	0	0	0	0	0	0	0	0	1.5	0	0	0	0	0	0	0	0	0	0	0	0	0	0	1	0	0	0	0	0	0	3.75	0
38	G	0	0	0	0	0	0	0	0	0	0	0	0	0	1	0	0	0	0	0	0	0	0	0	0	1.5	0	0	0	0	0	0	0	0	0	0	0	0	0	0	1	0	0	0	0	0	0	3.75	0
39	YPYDVPDYAG	0	0	0	0	0	0	0	0	0	0	0	0	0	0	0	0	0	0	0	0	0	0	111	0	0	0	2.75	0	0	0	0	0	0	0	118	0	0	0	0	0	0	0	0	0	0	5.5	0	0
40	G	0	0	0	0	0	0	0	0	0	0	0	0	0	0	0	0	0	0	0	0	0	0	111	0	0	0	2.75	0	0	0	0	0	0	0	118	0	0	0	0	0	0	0	0	0	0	5.5	0	0
41	YPYDVPDYAG	0	0	0	0	0	0	0	0	0	0	0	0	1.5	0	0	0	0	0	0	0	0	0	0	0	0	0	0	0	0	0	3.5	0	0	0	0	0	0	0	0	0	0	0	0	0	0	0	0	0
42	G	0	0	0	0	0	0	0	0	0	0	0	0	1.5	0	0	0	0	0	0	0	0	0	0	0	0	0	0	0	0	0	3.5	0	0	0	0	0	0	0	0	0	0	0	0	0	0	0	0	0
43	YPYDVPDYAG	0	0	0	0	0	0	0	0	0	0	0	0	0	0	0	0	0	0	0	3.5	0	0	0	0	0	0	0	0	0	0	0	0	0	0	0	0	0	0	0	0	0	0	0	0	0	0	0	0
44	G	0	0	0	0	0	0	0	0	0	0	0	0	0	0	0	0	0	0	0	3.5	0	0	0	0	0	0	0	0	0	0	0	0	0	0	0	0	0	0	0	0	0	0	0	0	0	0	0	0
45	YPYDVPDYAG	0	0	0	0	0	0	0	0	0	0	0	1	0	0	0	2.25	0	3.25	0	0	0	0	0	0	0	0	0	0	0	0	0	0	0	0	0	0	0	0	0	0	0	0	0	0	87	383.75	433.75	347.75
46	G	0	0	0	0	0	0	0	0	0	0	0	1	0	0	0	2.25	0	3.25	0	0	0	0	0	0	0	0	0	0	0	0	0	0	0	0	0	0	0	0	0	0	0	0	0	0	87	383.75	433.75	347.75
47	YPYDVPDYAG	647.5	0	1039.5	271.5	2754	4443	3505	723.5	270.5	4003	49	87	0	0	0	0	0	0	0	0	0	0	0	0	0	0	0	0	0	0	0	0	0	0	0	0	0	0	0	0	0	0	0	0	0	0	0	0
48	G	647.5	0	1039.5	271.5	2754	4443	3505	723.5	270.5	4003	49	87	0	0	0	0	0	0	0	0	0	0	0	0	0	0	0	0	0	0	0	0	0	0	0	0	0	0	0	0	0	0	0	0	0	0	0	0
49	YPYDVPDYAG	0	0	0	0	0	0	0	0	0	0	0	0	0	0	1768.5	10561.2	3063	338.5	460.25	0	0	108.5	0	0	0	0	0	0	0	0	0	0	0	0	0	0	0	0	0	0	0	0	0	0	0	0	0	0
50	G	0	0	0	0	0	0	0	0	0	0	0	0	0	0	1768.5	10561.2	3063	338.5	460.25	0	0	108.5	0	0	0	0	0	0	0	0	0	0	0	0	0	0	0	0	0	0	0	0	0	0	0	0	0	0
51	YPYDVPDYAG	0	0	0	0	0	0	0	1.5	0	0	0	0	0	0	0	0	0	0	0	0	0	0	0	0	0	0	0	0	0	0	0	0	0	0	0	0	0	0	2.5	0	0	0	0	0	0	6.5	0	0
52	G	0	0	0	0	0	0	0	1.5	0	0	0	0	0	0	0	0	0	0	0	0	0	0	0	0	0	0	0	0	0	0	0	0	0	0	0	0	0	0	2.5	0	0	0	0	0	0	6.5	0	0
53	YPYDVPDYAG	0	0	0	0	0	0	0	0	0	0	0	0	0	104.5	0	0	0	0	0	0	0	0	0	0	0	0	0	0	0	0	0	0	0	0	0	0	0	0	0	0	0	0	0	0	0	0	3	0
54	G	0	0	0	0	0	0	0	0	0	0	0	0	0	104.5	0	0	0	0	0	0	0	0	0	0	0	0	0	0	0	0	0	0	0	0	0	0	0	0	0	0	0	0	0	0	0	0	3	0
55	YPYDVPDYAG	0	0	0	6	0	0	0	86	0	0	0	0	0	0	0	0	2	0	0	0	0	3	0	0	0	0	0	0	0	0	0	0	0	0	0	0	0	0	0	0	0	0	0	0	0	0	0	0
56	G	0	0	0	6	0	0	0	86	0	0	0	0	0	0	0	0	2	0	0	0	0	3	0	0	0	0	0	0	0	0	0	0	0	0	0	0	0	0	0	0	0	0	0	0	0	0	0	0
57	YPYDVPDYAG	0	0	0	0	0	0	0	89	1083.75	133	130.25	86.75	0	0	0	0	0	96.5	0	0	0	0	0	0	0	0	0	0	0	0	0	0	0	0	0	0	0	0	0	0	0	0	0	0	0	0	0	0
58	G	0	0	0	0	0	0	0	89	1083.75	133	130.25	86.75	0	0	0	0	0	96.5	0	0	0	0	0	0	0	0	0	0	0	0	0	0	0	0	0	0	0	0	0	0	0	0	0	0	0	0	0	0
59	YPYDVPDYAG	0	0	0	0	0	0	0	0	0	0	0	0	0	3	0	0	0	0	0	0	0	0	0	0	0	0	0	1.5	0	0	0	319.5	102	220.5	1056.25	241.75	0	0	73	111.5	0	0	0	0	0	0	0	0
60	G	0	0	0	0	0	0	0	0	0	0	0	0	0	3	0	0	0	0	0	0	0	0	0	0	0	0	0	1.5	0	0	0	319.5	102	220.5	1056.25	241.75	0	0	73	111.5	0	0	0	0	0	0	0	0
61	YPYDVPDYAG	0	0	0	0	0	0	0	0	0	1.5	0	0	0	0	0	0	0	0	0	0	0	0	0	0	0	0	0	0	0	0	0	0	0	0	0	0	0	0	0	0	2.5	0	0	4.5	6.5	6.5	0	0
62	G	0	0	0	0	0	0	0	0	0	1.5	0	0	0	0	0	0	0	0	0	0	0	0	0	0	0	0	0	0	0	0	0	0	0	0	0	0	0	0	0	0	2.5	0	0	4.5	6.5	6.5	0	0
63	YPYDVPDYAG	0	0	0	0	0	0	0	0	0	0	0	0	0	0	0	0	0	1	0	0	0	0	0	0	2.5	3.5	0	0	0	0	87.5	0	0	0	0	0	0	0	0	0	0	0	0	0	0	0	0	0
64	G	0	0	0	0	0	0	0	0	0	0	0	0	0	0	0	0	0	1	0	0	0	0	0	0	2.5	3.5	0	0	0	0	87.5	0	0	0	0	0	0	0	0	0	0	0	0	0	0	0	0	0
65	YPYDVPDYAG	0	0	0	0	86.25	0	0	0	0	0	0	0	0	0	0	0	0	0	90	0	0	0	0	0	0	0	0	0	0	0	0	0	0	0	0	99	414	0	95.5	167	1296.5	354	0	0	93.75	94.5	0	0
66	G	0	0	0	0	86.25	0	0	0	0	0	0	0	0	0	0	0	0	0	90	0	0	0	0	0	0	0	0	0	0	0	0	0	0	0	0	99	414	0	95.5	167	1296.5	354	0	0	93.75	94.5	0	0
67	YPYDVPDYAG	0	0	0	0	0	0	0	0	0	0	1	0	0	0	0	0	1460	109	2448	377.75	198	150.25	331.75	0	0	0	0	0	0	2.25	0	0	0	0	0	0	0	0	0	0	0	0	0	0	4	0	0	95.5
68	G	0	0	0	0	0	0	0	0	0	0	1	0	0	0	0	0	1460	109	2448	377.75	198	150.25	331.75	0	0	0	0	0	0	2.25	0	0	0	0	0	0	0	0	0	0	0	0	0	0	4	0	0	95.5
69	YPYDVPDYAG	329.5	120.5	734.25	895.25	88	1034.5	276.5	187	95.5	102	89	138.5	0	90	86	0	0	0	0	0	0	0	0	0	0	0	0	0	0	0	0	0	0	0	0	0	0	0	0	0	3	0	0	0	0	5.5	0	0
70	G	329.5	120.5	734.25	895.25	88	1034.5	276.5	187	95.5	102	89	138.5	0	90	86	0	0	0	0	0	0	0	0	0	0	0	0	0	0	0	0	0	0	0	0	0	0	0	0	0	3	0	0	0	0	5.5	0	0
71	YPYDVPDYAG	0	0	0	0	0	0	0	0	0	0	0	0	215.5	0	88.5	0	0	0	0	0	139	180.5	0	0	0	0	0	0	0	0	0	1.5	0	0	0	0	0	0	0	0	0	0	0	0	0	4	0	0
72	G	0	0	0	0	0	0	0	0	0	0	0	0	215.5	0	88.5	0	0	0	0	0	139	180.5	0	0	0	0	0	0	0	0	0	1.5	0	0	0	0	0	0	0	0	0	0	0	0	0	4	0	0
73	YPYDVPDYAG	0	91	187.5	86	2682.25	89	275.75	86.5	95.75	91	77	2.25	0	0	0	0	0	0	0	0	0	0	0	0	0	0	0	0	137	136	0	0	0	0	106.5	0	107.5	0	100.5	0	0	4.5	3.5	0	0	0	0	0
74	G	0	91	187.5	86	2682.25	89	275.75	86.5	95.75	91	77	2.25	0	0	0	0	0	0	0	0	0	0	0	0	0	0	0	0	137	136	0	0	0	0	106.5	0	107.5	0	100.5	0	0	4.5	3.5	0	0	0	0	0
75	YPYDVPDYAG	0	0	0	0	0	0	0	0	0	0	86.5	0	0	0	0	0	0	0	0	0	0	0	0	0	0	0	0	0	0	0	0	0	0	0	0	0	0	0	0	0	0	0	0	0	0	0	0	3.75
76	G	0	0	0	0	0	0	0	0	0	0	86.5	0	0	0	0	0	0	0	0	0	0	0	0	0	0	0	0	0	0	0	0	0	0	0	0	0	0	0	0	0	0	0	0	0	0	0	0	3.75
77	YPYDVPDYAG	0	0	0	0	0	0	0	0	0	0	0	0	0	0	0	0	0	0	0	0	0	0	0	0	0	0	0	0	0	4	0	0	0	0	0	0	0	0	0	95.75	1112.75	0	0	0	0	0	0	0
78	G	0	0	0	0	0	0	0	0	0	0	0	0	0	0	0	0	0	0	0	0	0	0	0	0	0	0	0	0	0	4	0	0	0	0	0	0	0	0	0	95.75	1112.75	0	0	0	0	0	0	0
79	YPYDVPDYAG	0	0	0	0	0	0	0	0	0	0	0	0	0	0	0	0	0	0	3	0	0	0	0	0	0	0	0	0	0	5	0	0	0	0	0	0	0	4	0	0	0	0	0	0	2.5	0	0	0
80	G	0	0	0	0	0	0	0	0	0	0	0	0	0	0	0	0	0	0	3	0	0	0	0	0	0	0	0	0	0	5	0	0	0	0	0	0	0	4	0	0	0	0	0	0	2.5	0	0	0
81	YPYDVPDYAG	0	0	0	0	0	0	0	0	0	0	0	0	0	0
82	G	0	0	0	0	0	0	0	0	0	0	0	0	0	0
83	YPYDVPDYAG	0	0	0	0	0	0	0	2.5	0	0	0	0	0	0	0	0	0	0	0	0	0	0	0	0	0	0	0	0	0	0	0	0	0	0	0	0	0	0	4.5	0	0	0	0	0	0	0	0	0
84	G	0	0	0	0	0	0	0	2.5	0	0	0	0	0	0	0	0	0	0	0	0	0	0	0	0	0	0	0	0	0	0	0	0	0	0	0	0	0	0	4.5	0	0	0	0	0	0	0	0	0
85	YPYDVPDYAG	0	0	0	0	0	0	0	0	1.5	0	0	0	0	5.5	0	0	0	0	0	0	0	0	0	0	0	0	0	0	0	0	0	0	0	0	0	0	0	0	0	0	0	0	0	0	0	0	0	0
86	G	0	0	0	0	0	0	0	0	1.5	0	0	0	0	5.5	0	0	0	0	0	0	0	0	0	0	0	0	0	0	0	0	0	0	0	0	0	0	0	0	0	0	0	0	0	0	0	0	0	0
87	YPYDVPDYAG	0	0	0	0	0	0	0	0	1	0	0	0	0	0	0	0	0	0	0	0	0	0	0	0	0	0	4	0	0	0	0	0	0	0	0	101.5	0	0	0	0	0	0	0	0	0	0	0	0
88	G	0	0	0	0	0	0	0	0	1	0	0	0	0	0	0	0	0	0	0	0	0	0	0	0	0	0	4	0	0	0	0	0	0	0	0	101.5	0	0	0	0	0	0	0	0	0	0	0	0
89	YPYDVPDYAG	0	0	0	0	0	0	0	0	0	0	0	0	0	0	0	0	0	0	0	0	0	0	0	0	0	0	0	0	0	0	0	0	0	0	0	0	0	0	0	0	0	0	0	0	0	4.5	0	0
90	G	0	0	0	0	0	0	0	0	0	0	0	0	0	0	0	0	0	0	0	0	0	0	0	0	0	0	0	0	0	0	0	0	0	0	0	0	0	0	0	0	0	0	0	0	0	4.5	0	0
91	YPYDVPDYAG	0	0	0	0	0	0	189.5	0	0	0	0	0	0	2.75	0	1.5	0	0	0	1	0	0	0	0	0	0	0	0	0	0	0	0	0	0	0	0	0	0	0	0	0	0	0	0	0	0	0	0
92	G	0	0	0	0	0	0	189.5	0	0	0	0	0	0	2.75	0	1.5	0	0	0	1	0	0	0	0	0	0	0	0	0	0	0	0	0	0	0	0	0	0	0	0	0	0	0	0	0	0	0	0
93	YPYDVPDYAG	0	0	0	0	0	0	0	0	1858.25	3464	295	0	0	0	0	0	0	0	0	0	0	0	0	0	0	0	0	0	0	0	0	0	0	0	0	0	0	0	0	0	0	0	0	0	0	0	0	0
94	G	0	0	0	0	0	0	0	0	1858.25	3464	295	0	0	0	0	0	0	0	0	0	0	0	0	0	0	0	0	0	0	0	0	0	0	0	0	0	0	0	0	0	0	0	0	0	0	0	0	0
95	YPYDVPDYAG	0	0	0	111.75	0	0	0	0	0	0	0	0	0	0	0	0	91.5	712	0	0	0	0	98.75	0	213.25	0	0	0	0	0	0	0	0	0	3	0	0	0	0	0	0	0	0	0	0	0	0	0
96	G	0	0	0	111.75	0	0	0	0	0	0	0	0	0	0	0	0	91.5	712	0	0	0	0	98.75	0	213.25	0	0	0	0	0	0	0	0	0	3	0	0	0	0	0	0	0	0	0	0	0	0	0
97	YPYDVPDYAG	0	0	0	0	0	0	0	0	0	0	0	0	0	0	0	0	0	0	0	0	0	3	0	0	0	0	92	0	2	0	0	0	0	0	0	3	0	0	0	0	0	0	0	1.5	0	0	0	0
98	G	0	0	0	0	0	0	0	0	0	0	0	0	0	0	0	0	0	0	0	0	0	3	0	0	0	0	92	0	2	0	0	0	0	0	0	3	0	0	0	0	0	0	0	1.5	0	0	0	0
99	YPYDVPDYAG	0	0	0	0	0	0	0	0	0	0	0	0	0	0	0	0	0	0	0	0	0	0	0	0	0	0	0	0	0	0	0	0	0	0	0	0	0	0	0	0	0	0	0	0	0	0	0	0
100	G	0	0	0	0	0	0	0	0	0	0	0	0	0	0	0	0	0	0	0	0	0	0	0	0	0	0	0	0	0	0	0	0	0	0	0	0	0	0	0	0	0	0	0	0	0	0	0	0
101	YPYDVPDYAG	0	0	0	0	0	0	0	0	3	3	0	0	0	0	0	0	0	0	0	0	0	0	0	0	0	0	0	0	0	0	0	0	0	0	0	0	0	0	0	0	0	0	0	0	0	0	0	0
102	G	0	0	0	0	0	0	0	0	3	3	0	0	0	0	0	0	0	0	0	0	0	0	0	0	0	0	0	0	0	0	0	0	0	0	0	0	0	0	0	0	0	0	0	0	0	0	0	0
103	YPYDVPDYAG	0	0	0	0	0	0	0	0	0	0	0	0	0	0	0	0	0	0	0	0	0	0	0	1	0	0	0	0	0	0	0	0	0	0	0	0	0	0	0	0	0	0	0	0	0	0	0	0
104	G	0	0	0	0	0	0	0	0	0	0	0	0	0	0	0	0	0	0	0	0	0	0	0	1	0	0	0	0	0	0	0	0	0	0	0	0	0	0	0	0	0	0	0	0	0	0	0	0
105	YPYDVPDYAG	0	0	0	1.5	0	0	0	0	0	1	0	0	0	0	0	98.75	94	102.5	0	0	99.75	821.25	0	628.75	647.5	1039.5	2754	3505	270.5	49	0	0	0	0	0	0	0	0	0	0	0	0	0	0	0	0	0	0
106	G	0	0	0	1.5	0	0	0	0	0	1	0	0	0	0	0	98.75	94	102.5	0	0	99.75	821.25	0	628.75	647.5	1039.5	2754	3505	270.5	49	0	0	0	0	0	0	0	0	0	0	0	0	0	0	0	0	0	0
107	YPYDVPDYAG	238	80.5	82.5	0	0	6.75	0	0	0	0	0	0	0	0	0	0	0	0	0	0	0	0	0	0	0	0	0	0	0	0	0	0	0	0	0	0	0	0	0	0	0	0	0	0	0	0	0	0
108	G	238	80.5	82.5	0	0	6.75	0	0	0	0	0	0	0	0	0	0	0	0	0	0	0	0	0	0	0	0	0	0	0	0	0	0	0	0	0	0	0	0	0	0	0	0	0	0	0	0	0	0
109	YPYDVPDYAG	0	0	0	0	0	0	0	0	0	0	0	0	0	0	6	0	0	0	0	0	0	0	0	0	0	0	0	0	0	0	0	0	0	2.5	6.25	0	0	0	0	0	0	3	0	0	0	0	6.5	0
110	G	0	0	0	0	0	0	0	0	0	0	0	0	0	0	6	0	0	0	0	0	0	0	0	0	0	0	0	0	0	0	0	0	0	2.5	6.25	0	0	0	0	0	0	3	0	0	0	0	6.5	0
111	YPYDVPDYAG	0	89	133	86.75	0	0	0	0	1.5	0	0	0	0	9.5	0	0	0	0	0	0	0	0	0	0	0	0	0	0	0	0	0	0	0	3	0	0	0	0	0	0	0	0	0	0	0	0	0	0
112	G	0	89	133	86.75	0	0	0	0	1.5	0	0	0	0	9.5	0	0	0	0	0	0	0	0	0	0	0	0	0	0	0	0	0	0	0	3	0	0	0	0	0	0	0	0	0	0	0	0	0	0
113	YPYDVPDYAG	0	0	2	0	0	0	0	0	6	0	0	0	0	0	0	0	0	0	0	0	0	0	0	0	0	0	0	0	0	0	0	2.75	0	0	0	0	0	0	0	0	0	0	2.5	0	6.75	2	0	0
114	G	0	0	2	0	0	0	0	0	6	0	0	0	0	0	0	0	0	0	0	0	0	0	0	0	0	0	0	0	0	0	0	2.75	0	0	0	0	0	0	0	0	0	0	2.5	0	6.75	2	0	0
115	YPYDVPDYAG	100.5	0	0	0	0	0	2.5	0	0	0	0	0	0	0	88.5	83.5	0	1296.5	0	93.75	0	0	0	0	0	0	0	55	0	0	0	0	0	0	0	0	0	0	153	148.25	0	0	0	0	0	0	0	0
116	G	100.5	0	0	0	0	0	2.5	0	0	0	0	0	0	0	88.5	83.5	0	1296.5	0	93.75	0	0	0	0	0	0	0	55	0	0	0	0	0	0	0	0	0	0	153	148.25	0	0	0	0	0	0	0	0
117	YPYDVPDYAG	486.25	86	0	0	0	0	0	0	0	0	0	0	0	0	0	0	0	0	0	0	1	0	0	0	0	0	0	0	0	0	5	0	0	0	0	0	0	0	0	0	0	0	0	0	4.5	0	0	0
118	G	486.25	86	0	0	0	0	0	0	0	0	0	0	0	0	0	0	0	0	0	0	1	0	0	0	0	0	0	0	0	0	5	0	0	0	0	0	0	0	0	0	0	0	0	0	4.5	0	0	0
119	YPYDVPDYAG	1907	68	113	444.75	0	0	114.5	0	89	0	0	0	0	0	3	365.5	71.5	81	147.75	79.5	0	0	0	0	0	0	0	0	4	0	0	0	0	0	5.25	0	0	0	0	0	0	0	3	0	0	0	0	0
120	G	1907	68	113	444.75	0	0	114.5	0	89	0	0	0	0	0	3	365.5	71.5	81	147.75	79.5	0	0	0	0	0	0	0	0	4	0	0	0	0	0	5.25	0	0	0	0	0	0	0	3	0	0	0	0	0
121	YPYDVPDYAG	0	0	0	0	0	0	0	0	0	0	0	0	0	0	0	0	0	0	0	0	0	0	0	0	0	0	0	0	0	0	0	0	0	0	0	0	0	0	0	0	0	0	0	0	0	0	0	0
122	G	0	0	0	0	0	0	0	0	0	0	0	0	0	0	0	0	0	0	0	0	0	0	0	0	0	0	0	0	0	0	0	0	0	0	0	0	0	0	0	0	0	0	0	0	0	0	0	0
123	YPYDVPDYAG	0	0	0	0
124	G	0	0	0	0
125	YPYDVPDYAG	0	0	0	0	0	0	0	0	0	0	89.5	20210	65326	65326	64914.2	2318.5	9090.5	512	109	85.5	0	0	0	0	2009.75	0	0	0	0	0	0	0	0	1	0	0	0	0	0	0	0	0	0	0	0	0	0	0
126	G	0	0	0	0	0	0	0	0	0	0	89.5	20210	65326	65326	64914.2	2318.5	9090.5	512	109	85.5	0	0	0	0	2009.75	0	0	0	0	0	0	0	0	1	0	0	0	0	0	0	0	0	0	0	0	0	0	0
127	YPYDVPDYAG	91.5	0	0	0	0	0	0	0	0	0	0	92.5	0	0	0	0	0	0	0	0	0	0	0	0	0	0	0	0	0	0	0	0	0	0	0	0	0	0	0	0	0	0	0	0	0	7.5	0	0
128	G	91.5	0	0	0	0	0	0	0	0	0	0	92.5	0	0	0	0	0	0	0	0	0	0	0	0	0	0	0	0	0	0	0	0	0	0	0	0	0	0	0	0	0	0	0	0	0	7.5	0	0
129	YPYDVPDYAG	0	0	0	0	0	0	0	22.25	22.5	0	0	0	0	0	0	0	0	0	1	0	0	0	0	110.75	4.25	0	0	0	0	0	0	0	0	0	0	0	0	0	0	0	0	0	0	0	0	0	1.25	0
130	G	0	0	0	0	0	0	0	22.25	22.5	0	0	0	0	0	0	0	0	0	1	0	0	0	0	110.75	4.25	0	0	0	0	0	0	0	0	0	0	0	0	0	0	0	0	0	0	0	0	0	1.25	0
131	YPYDVPDYAG	0	0	0	0	0	0	0	16	0	0	4	6	0	0	0	0	0	89.25	0	0	0	0	0	0	0	0	0	0	0	0	0	0	0	0	2	0	2	5	5	0	0	0	0	0	0	0	0	0
132	G	0	0	0	0	0	0	0	16	0	0	4	6	0	0	0	0	0	89.25	0	0	0	0	0	0	0	0	0	0	0	0	0	0	0	0	2	0	2	5	5	0	0	0	0	0	0	0	0	0
133	YPYDVPDYAG	0	0	0	0	0	0	15.5	22	0	0	0	0	0	0	0	0	0	0	6.5	0	0	0	0	0	0	0	0	6	0	0	0	0	0	0	0	0	0	0	0	0	0	0	0	0	0	0	0	0
134	G	0	0	0	0	0	0	15.5	22	0	0	0	0	0	0	0	0	0	0	6.5	0	0	0	0	0	0	0	0	6	0	0	0	0	0	0	0	0	0	0	0	0	0	0	0	0	0	0	0	0
135	YPYDVPDYAG	0	0	0	0	0	0	0	0	71.5	0	1	0	0	0	0	0	0	0	0	0	0	0	0	1.5	0	0	0	0	0	0	0	0	0	0	0	0	0	0	0	0	0	0	0	0	0	0	0	0
136	G	0	0	0	0	0	0	0	0	71.5	0	1	0	0	0	0	0	0	0	0	0	0	0	0	1.5	0	0	0	0	0	0	0	0	0	0	0	0	0	0	0	0	0	0	0	0	0	0	0	0
137	YPYDVPDYAG	0	0	0	0	0	0	0	0	0	0	0	0	0	0	0	4	3.5	0	0	0	0	0	0	0	0	0	0	0	0	0	0	0	0	0	0	0	0	0	0	0	0	0	0	0	0	0	0	0
138	G	0	0	0	0	0	0	0	0	0	0	0	0	0	0	0	4	3.5	0	0	0	0	0	0	0	0	0	0	0	0	0	0	0	0	0	0	0	0	0	0	0	0	0	0	0	0	0	0	0
139	YPYDVPDYAG	0	0	0	0	2.5	1.5	0	0	0	0	0	0	0	0	0	0	0	0	0	0	0	0	0	0	100.75	0	0	0	0	0	0	0	0	0	1.5	0	0	0	0	0	0	0	0	0	0	0	0	0
140	G	0	0	0	0	2.5	1.5	0	0	0	0	0	0	0	0	0	0	0	0	0	0	0	0	0	0	100.75	0	0	0	0	0	0	0	0	0	1.5	0	0	0	0	0	0	0	0	0	0	0	0	0
141	YPYDVPDYAG	0	0	0	0	0	0	0	0	0	0	0	0	0	0	0	0	0	0	0	0	0	0	0	0	0	0	0	0	0	0	0	0	0	0	0	0	0	0	0	0	0	0	0	0	0	0	0	0
142	G	0	0	0	0	0	0	0	0	0	0	0	0	0	0	0	0	0	0	0	0	0	0	0	0	0	0	0	0	0	0	0	0	0	0	0	0	0	0	0	0	0	0	0	0	0	0	0	0
143	YPYDVPDYAG	0	0	0	0	0	0	0	0	0	0	0	0	0	0	0	0	0	0	0	0	0	0	3	0	0	0	0	0	1.25	0	0	0
144	G	0	0	0	0	0	0	0	0	0	0	0	0	0	0	0	0	0	0	0	0	0	0	3	0	0	0	0	0	1.25	0	0	0
	YPYDVPDYAG	G	YPYDVPDYAG	G	YPYDVPDYAG	G	YPYDVPDYAG	G	YPYDVPDYAG	G	YPYDVPDYAG	G	YPYDVPDYAG	G	YPYDVPDYAG	G	YPYDVPDYAG	G	YPYDVPDYAG	G	YPYDVPDYAG	G	YPYDVPDYAG	G	YPYDVPDYAG	G	YPYDVPDYAG	G	YPYDVPDYAG	G	YPYDVPDYAG	G	YPYDVPDYAG	G	YPYDVPDYAG	G	YPYDVPDYAG	G	YPYDVPDYAG	G	YPYDVPDYAG	G	YPYDVPDYAG	G	YPYDVPDYAG	G	YPYDVPDYAG	G	YPYDVPDYAG
[truncated: 19 more columns]

## Sheet: Intensity Plot
Intensity Plot Linear Epitope Mapping (PEP20215042037) - Mouse IgG 3D10
The intensity plot is based on the corrected intensity values and sorted from the N-terminus of erythrocyte membrane protein 1 to the C-terminus of PvEBP2.
Spot Family	Row	Column	Peptide	Antigen	Mouse IgG 3D10, 10 µg/ml
University of Alberta, 4 Antigens, 20 aa Linear Peptides (PEP20215042037)	2	2	GSGSGSGMDSTSTIANKIEE	Erythrocyte membrane protein 1	0
University of Alberta, 4 Antigens, 20 aa Linear Peptides (PEP20215042037)	2	3	SGSGSGMDSTSTIANKIEEY	Erythrocyte membrane protein 1	0
University of Alberta, 4 Antigens, 20 aa Linear Peptides (PEP20215042037)	2	4	GSGSGMDSTSTIANKIEEYL	Erythrocyte membrane protein 1	0
University of Alberta, 4 Antigens, 20 aa Linear Peptides (PEP20215042037)	2	5	SGSGMDSTSTIANKIEEYLG	Erythrocyte membrane protein 1	0
University of Alberta, 4 Antigens, 20 aa Linear Peptides (PEP20215042037)	2	6	GSGMDSTSTIANKIEEYLGA	Erythrocyte membrane protein 1	0
University of Alberta, 4 Antigens, 20 aa Linear Peptides (PEP20215042037)	2	7	SGMDSTSTIANKIEEYLGAK	Erythrocyte membrane protein 1	1
University of Alberta, 4 Antigens, 20 aa Linear Peptides (PEP20215042037)	2	8	GMDSTSTIANKIEEYLGAKS	Erythrocyte membrane protein 1	0
University of Alberta, 4 Antigens, 20 aa Linear Peptides (PEP20215042037)	2	9	MDSTSTIANKIEEYLGAKSD	Erythrocyte membrane protein 1	0
University of Alberta, 4 Antigens, 20 aa Linear Peptides (PEP20215042037)	2	10	DSTSTIANKIEEYLGAKSDD	Erythrocyte membrane protein 1	0
University of Alberta, 4 Antigens, 20 aa Linear Peptides (PEP20215042037)	2	11	STSTIANKIEEYLGAKSDDS	Erythrocyte membrane protein 1	3.75
University of Alberta, 4 Antigens, 20 aa Linear Peptides (PEP20215042037)	2	12	TSTIANKIEEYLGAKSDDSK	Erythrocyte membrane protein 1	0
University of Alberta, 4 Antigens, 20 aa Linear Peptides (PEP20215042037)	2	13	STIANKIEEYLGAKSDDSKI	Erythrocyte membrane protein 1	0
University of Alberta, 4 Antigens, 20 aa Linear Peptides (PEP20215042037)	2	14	TIANKIEEYLGAKSDDSKID	Erythrocyte membrane protein 1	0
University of Alberta, 4 Antigens, 20 aa Linear Peptides (PEP20215042037)	2	15	IANKIEEYLGAKSDDSKIDE	Erythrocyte membrane protein 1	0
University of Alberta, 4 Antigens, 20 aa Linear Peptides (PEP20215042037)	2	16	ANKIEEYLGAKSDDSKIDEL	Erythrocyte membrane protein 1	0
University of Alberta, 4 Antigens, 20 aa Linear Peptides (PEP20215042037)	2	17	NKIEEYLGAKSDDSKIDELL	Erythrocyte membrane protein 1	0
University of Alberta, 4 Antigens, 20 aa Linear Peptides (PEP20215042037)	2	18	KIEEYLGAKSDDSKIDELLK	Erythrocyte membrane protein 1	0
University of Alberta, 4 Antigens, 20 aa Linear Peptides (PEP20215042037)	2	19	IEEYLGAKSDDSKIDELLKA	Erythrocyte membrane protein 1	0
University of Alberta, 4 Antigens, 20 aa Linear Peptides (PEP20215042037)	2	20	EEYLGAKSDDSKIDELLKAD	Erythrocyte membrane protein 1	0
University of Alberta, 4 Antigens, 20 aa Linear Peptides (PEP20215042037)	2	21	EYLGAKSDDSKIDELLKADP	Erythrocyte membrane protein 1	0
University of Alberta, 4 Antigens, 20 aa Linear Peptides (PEP20215042037)	2	22	YLGAKSDDSKIDELLKADPS	Erythrocyte membrane protein 1	0
University of Alberta, 4 Antigens, 20 aa Linear Peptides (PEP20215042037)	2	23	LGAKSDDSKIDELLKADPSE	Erythrocyte membrane protein 1	0
University of Alberta, 4 Antigens, 20 aa Linear Peptides (PEP20215042037)	2	24	GAKSDDSKIDELLKADPSEV	Erythrocyte membrane protein 1	0
University of Alberta, 4 Antigens, 20 aa Linear Peptides (PEP20215042037)	2	25	AKSDDSKIDELLKADPSEVE	Erythrocyte membrane protein 1	0
University of Alberta, 4 Antigens, 20 aa Linear Peptides (PEP20215042037)	2	26	KSDDSKIDELLKADPSEVEY	Erythrocyte membrane protein 1	0
University of Alberta, 4 Antigens, 20 aa Linear Peptides (PEP20215042037)	2	27	SDDSKIDELLKADPSEVEYY	Erythrocyte membrane protein 1	0
University of Alberta, 4 Antigens, 20 aa Linear Peptides (PEP20215042037)	2	28	DDSKIDELLKADPSEVEYYR	Erythrocyte membrane protein 1	0
University of Alberta, 4 Antigens, 20 aa Linear Peptides (PEP20215042037)	2	29	DSKIDELLKADPSEVEYYRS	Erythrocyte membrane protein 1	0
University of Alberta, 4 Antigens, 20 aa Linear Peptides (PEP20215042037)	2	30	SKIDELLKADPSEVEYYRSG	Erythrocyte membrane protein 1	0
University of Alberta, 4 Antigens, 20 aa Linear Peptides (PEP20215042037)	2	31	KIDELLKADPSEVEYYRSGG	Erythrocyte membrane protein 1	0
University of Alberta, 4 Antigens, 20 aa Linear Peptides (PEP20215042037)	2	32	IDELLKADPSEVEYYRSGGD	Erythrocyte membrane protein 1	0
University of Alberta, 4 Antigens, 20 aa Linear Peptides (PEP20215042037)	2	33	DELLKADPSEVEYYRSGGDG	Erythrocyte membrane protein 1	0
University of Alberta, 4 Antigens, 20 aa Linear Peptides (PEP20215042037)	2	34	ELLKADPSEVEYYRSGGDGD	Erythrocyte membrane protein 1	0
University of Alberta, 4 Antigens, 20 aa Linear Peptides (PEP20215042037)	2	35	LLKADPSEVEYYRSGGDGDY	Erythrocyte membrane protein 1	0
University of Alberta, 4 Antigens, 20 aa Linear Peptides (PEP20215042037)	2	36	LKADPSEVEYYRSGGDGDYL	Erythrocyte membrane protein 1	0
University of Alberta, 4 Antigens, 20 aa Linear Peptides (PEP20215042037)	2	37	KADPSEVEYYRSGGDGDYLK	Erythrocyte membrane protein 1	0
University of Alberta, 4 Antigens, 20 aa Linear Peptides (PEP20215042037)	2	38	ADPSEVEYYRSGGDGDYLKN	Erythrocyte membrane protein 1	0
University of Alberta, 4 Antigens, 20 aa Linear Peptides (PEP20215042037)	2	39	DPSEVEYYRSGGDGDYLKNN	Erythrocyte membrane protein 1	0
University of Alberta, 4 Antigens, 20 aa Linear Peptides (PEP20215042037)	2	40	PSEVEYYRSGGDGDYLKNNI	Erythrocyte membrane protein 1	0
University of Alberta, 4 Antigens, 20 aa Linear Peptides (PEP20215042037)	2	41	SEVEYYRSGGDGDYLKNNIC	Erythrocyte membrane protein 1	0
University of Alberta, 4 Antigens, 20 aa Linear Peptides (PEP20215042037)	2	42	EVEYYRSGGDGDYLKNNICK	Erythrocyte membrane protein 1	0
University of Alberta, 4 Antigens, 20 aa Linear Peptides (PEP20215042037)	2	43	VEYYRSGGDGDYLKNNICKI	Erythrocyte membrane protein 1	0
University of Alberta, 4 Antigens, 20 aa Linear Peptides (PEP20215042037)	2	44	EYYRSGGDGDYLKNNICKIT	Erythrocyte membrane protein 1	0
University of Alberta, 4 Antigens, 20 aa Linear Peptides (PEP20215042037)	2	45	YYRSGGDGDYLKNNICKITV	Erythrocyte membrane protein 1	0
University of Alberta, 4 Antigens, 20 aa Linear Peptides (PEP20215042037)	2	46	YRSGGDGDYLKNNICKITVN	Erythrocyte membrane protein 1	0
University of Alberta, 4 Antigens, 20 aa Linear Peptides (PEP20215042037)	2	47	RSGGDGDYLKNNICKITVNH	Erythrocyte membrane protein 1	0
University of Alberta, 4 Antigens, 20 aa Linear Peptides (PEP20215042037)	2	48	SGGDGDYLKNNICKITVNHS	Erythrocyte membrane protein 1	0
University of Alberta, 4 Antigens, 20 aa Linear Peptides (PEP20215042037)	2	49	GGDGDYLKNNICKITVNHSD	Erythrocyte membrane protein 1	0
University of Alberta, 4 Antigens, 20 aa Linear Peptides (PEP20215042037)	2	50	GDGDYLKNNICKITVNHSDS	Erythrocyte membrane protein 1	0
University of Alberta, 4 Antigens, 20 aa Linear Peptides (PEP20215042037)	2	51	DGDYLKNNICKITVNHSDSG	Erythrocyte membrane protein 1	0
University of Alberta, 4 Antigens, 20 aa Linear Peptides (PEP20215042037)	2	52	GDYLKNNICKITVNHSDSGK	Erythrocyte membrane protein 1	0
University of Alberta, 4 Antigens, 20 aa Linear Peptides (PEP20215042037)	2	53	DYLKNNICKITVNHSDSGKY	Erythrocyte membrane protein 1	0
University of Alberta, 4 Antigens, 20 aa Linear Peptides (PEP20215042037)	2	54	YLKNNICKITVNHSDSGKYD	Erythrocyte membrane protein 1	3
University of Alberta, 4 Antigens, 20 aa Linear Peptides (PEP20215042037)	2	55	LKNNICKITVNHSDSGKYDP	Erythrocyte membrane protein 1	0
University of Alberta, 4 Antigens, 20 aa Linear Peptides (PEP20215042037)	2	56	KNNICKITVNHSDSGKYDPC	Erythrocyte membrane protein 1	0
University of Alberta, 4 Antigens, 20 aa Linear Peptides (PEP20215042037)	2	57	NNICKITVNHSDSGKYDPCE	Erythrocyte membrane protein 1	0
University of Alberta, 4 Antigens, 20 aa Linear Peptides (PEP20215042037)	2	58	NICKITVNHSDSGKYDPCEK	Erythrocyte membrane protein 1	0
University of Alberta, 4 Antigens, 20 aa Linear Peptides (PEP20215042037)	2	59	ICKITVNHSDSGKYDPCEKK	Erythrocyte membrane protein 1	92.75
University of Alberta, 4 Antigens, 20 aa Linear Peptides (PEP20215042037)	2	60	CKITVNHSDSGKYDPCEKKL	Erythrocyte membrane protein 1	0
University of Alberta, 4 Antigens, 20 aa Linear Peptides (PEP20215042037)	2	61	KITVNHSDSGKYDPCEKKLP	Erythrocyte membrane protein 1	0
University of Alberta, 4 Antigens, 20 aa Linear Peptides (PEP20215042037)	2	62	ITVNHSDSGKYDPCEKKLPP	Erythrocyte membrane protein 1	0
University of Alberta, 4 Antigens, 20 aa Linear Peptides (PEP20215042037)	2	63	TVNHSDSGKYDPCEKKLPPY	Erythrocyte membrane protein 1	0
University of Alberta, 4 Antigens, 20 aa Linear Peptides (PEP20215042037)	2	64	VNHSDSGKYDPCEKKLPPYD	Erythrocyte membrane protein 1	0
University of Alberta, 4 Antigens, 20 aa Linear Peptides (PEP20215042037)	2	65	NHSDSGKYDPCEKKLPPYDD	Erythrocyte membrane protein 1	0
University of Alberta, 4 Antigens, 20 aa Linear Peptides (PEP20215042037)	2	66	HSDSGKYDPCEKKLPPYDDN	Erythrocyte membrane protein 1	0
University of Alberta, 4 Antigens, 20 aa Linear Peptides (PEP20215042037)	2	67	SDSGKYDPCEKKLPPYDDND	Erythrocyte membrane protein 1	0
University of Alberta, 4 Antigens, 20 aa Linear Peptides (PEP20215042037)	4	2	DSGKYDPCEKKLPPYDDNDQ	Erythrocyte membrane protein 1	0
University of Alberta, 4 Antigens, 20 aa Linear Peptides (PEP20215042037)	4	3	SGKYDPCEKKLPPYDDNDQW	Erythrocyte membrane protein 1	0
University of Alberta, 4 Antigens, 20 aa Linear Peptides (PEP20215042037)	4	4	GKYDPCEKKLPPYDDNDQWK	Erythrocyte membrane protein 1	0
University of Alberta, 4 Antigens, 20 aa Linear Peptides (PEP20215042037)	4	5	KYDPCEKKLPPYDDNDQWKC	Erythrocyte membrane protein 1	0
University of Alberta, 4 Antigens, 20 aa Linear Peptides (PEP20215042037)	4	6	YDPCEKKLPPYDDNDQWKCQ	Erythrocyte membrane protein 1	0
University of Alberta, 4 Antigens, 20 aa Linear Peptides (PEP20215042037)	4	7	DPCEKKLPPYDDNDQWKCQQ	Erythrocyte membrane protein 1	0
University of Alberta, 4 Antigens, 20 aa Linear Peptides (PEP20215042037)	4	8	PCEKKLPPYDDNDQWKCQQN	Erythrocyte membrane protein 1	0
University of Alberta, 4 Antigens, 20 aa Linear Peptides (PEP20215042037)	4	9	CEKKLPPYDDNDQWKCQQNS	Erythrocyte membrane protein 1	0
University of Alberta, 4 Antigens, 20 aa Linear Peptides (PEP20215042037)	4	10	EKKLPPYDDNDQWKCQQNSS	Erythrocyte membrane protein 1	0
University of Alberta, 4 Antigens, 20 aa Linear Peptides (PEP20215042037)	4	11	KKLPPYDDNDQWKCQQNSSD	Erythrocyte membrane protein 1	0
University of Alberta, 4 Antigens, 20 aa Linear Peptides (PEP20215042037)	4	12	KLPPYDDNDQWKCQQNSSDG	Erythrocyte membrane protein 1	0
University of Alberta, 4 Antigens, 20 aa Linear Peptides (PEP20215042037)	4	13	LPPYDDNDQWKCQQNSSDGS	Erythrocyte membrane protein 1	0
University of Alberta, 4 Antigens, 20 aa Linear Peptides (PEP20215042037)	4	14	PPYDDNDQWKCQQNSSDGSG	Erythrocyte membrane protein 1	0
University of Alberta, 4 Antigens, 20 aa Linear Peptides (PEP20215042037)	4	15	PYDDNDQWKCQQNSSDGSGK	Erythrocyte membrane protein 1	0
University of Alberta, 4 Antigens, 20 aa Linear Peptides (PEP20215042037)	4	16	YDDNDQWKCQQNSSDGSGKP	Erythrocyte membrane protein 1	0
University of Alberta, 4 Antigens, 20 aa Linear Peptides (PEP20215042037)	4	17	DDNDQWKCQQNSSDGSGKPE	Erythrocyte membrane protein 1	0
University of Alberta, 4 Antigens, 20 aa Linear Peptides (PEP20215042037)	4	18	DNDQWKCQQNSSDGSGKPEN	Erythrocyte membrane protein 1	0
University of Alberta, 4 Antigens, 20 aa Linear Peptides (PEP20215042037)	4	19	NDQWKCQQNSSDGSGKPENI	Erythrocyte membrane protein 1	3
University of Alberta, 4 Antigens, 20 aa Linear Peptides (PEP20215042037)	4	20	DQWKCQQNSSDGSGKPENIC	Erythrocyte membrane protein 1	0
University of Alberta, 4 Antigens, 20 aa Linear Peptides (PEP20215042037)	4	21	QWKCQQNSSDGSGKPENICV	Erythrocyte membrane protein 1	0
University of Alberta, 4 Antigens, 20 aa Linear Peptides (PEP20215042037)	4	22	WKCQQNSSDGSGKPENICVP	Erythrocyte membrane protein 1	0
University of Alberta, 4 Antigens, 20 aa Linear Peptides (PEP20215042037)	4	23	KCQQNSSDGSGKPENICVPP	Erythrocyte membrane protein 1	0
University of Alberta, 4 Antigens, 20 aa Linear Peptides (PEP20215042037)	4	24	CQQNSSDGSGKPENICVPPR	Erythrocyte membrane protein 1	0
University of Alberta, 4 Antigens, 20 aa Linear Peptides (PEP20215042037)	4	25	QQNSSDGSGKPENICVPPRR	Erythrocyte membrane protein 1	0
University of Alberta, 4 Antigens, 20 aa Linear Peptides (PEP20215042037)	4	26	QNSSDGSGKPENICVPPRRE	Erythrocyte membrane protein 1	0
University of Alberta, 4 Antigens, 20 aa Linear Peptides (PEP20215042037)	4	27	NSSDGSGKPENICVPPRRER	Erythrocyte membrane protein 1	0
University of Alberta, 4 Antigens, 20 aa Linear Peptides (PEP20215042037)	4	28	SSDGSGKPENICVPPRRERL	Erythrocyte membrane protein 1	0
University of Alberta, 4 Antigens, 20 aa Linear Peptides (PEP20215042037)	4	29	SDGSGKPENICVPPRRERLC	Erythrocyte membrane protein 1	0
University of Alberta, 4 Antigens, 20 aa Linear Peptides (PEP20215042037)	4	30	DGSGKPENICVPPRRERLCT	Erythrocyte membrane protein 1	0
University of Alberta, 4 Antigens, 20 aa Linear Peptides (PEP20215042037)	4	31	GSGKPENICVPPRRERLCTY	Erythrocyte membrane protein 1	0
University of Alberta, 4 Antigens, 20 aa Linear Peptides (PEP20215042037)	4	32	SGKPENICVPPRRERLCTYN	Erythrocyte membrane protein 1	0
University of Alberta, 4 Antigens, 20 aa Linear Peptides (PEP20215042037)	4	33	GKPENICVPPRRERLCTYNL	Erythrocyte membrane protein 1	0
University of Alberta, 4 Antigens, 20 aa Linear Peptides (PEP20215042037)	4	34	KPENICVPPRRERLCTYNLE	Erythrocyte membrane protein 1	0
University of Alberta, 4 Antigens, 20 aa Linear Peptides (PEP20215042037)	4	35	PENICVPPRRERLCTYNLEN	Erythrocyte membrane protein 1	0
University of Alberta, 4 Antigens, 20 aa Linear Peptides (PEP20215042037)	4	36	ENICVPPRRERLCTYNLENL	Erythrocyte membrane protein 1	0
University of Alberta, 4 Antigens, 20 aa Linear Peptides (PEP20215042037)	4	37	NICVPPRRERLCTYNLENLK	Erythrocyte membrane protein 1	0
University of Alberta, 4 Antigens, 20 aa Linear Peptides (PEP20215042037)	4	38	ICVPPRRERLCTYNLENLKF	Erythrocyte membrane protein 1	1
University of Alberta, 4 Antigens, 20 aa Linear Peptides (PEP20215042037)	4	39	CVPPRRERLCTYNLENLKFD	Erythrocyte membrane protein 1	0
University of Alberta, 4 Antigens, 20 aa Linear Peptides (PEP20215042037)	4	40	VPPRRERLCTYNLENLKFDK	Erythrocyte membrane protein 1	0
University of Alberta, 4 Antigens, 20 aa Linear Peptides (PEP20215042037)	4	41	PPRRERLCTYNLENLKFDKI	Erythrocyte membrane protein 1	0
University of Alberta, 4 Antigens, 20 aa Linear Peptides (PEP20215042037)	4	42	PRRERLCTYNLENLKFDKIR	Erythrocyte membrane protein 1	0
University of Alberta, 4 Antigens, 20 aa Linear Peptides (PEP20215042037)	4	43	RRERLCTYNLENLKFDKIRD	Erythrocyte membrane protein 1	0
University of Alberta, 4 Antigens, 20 aa Linear Peptides (PEP20215042037)	4	44	RERLCTYNLENLKFDKIRDN	Erythrocyte membrane protein 1	0
University of Alberta, 4 Antigens, 20 aa Linear Peptides (PEP20215042037)	4	45	ERLCTYNLENLKFDKIRDNN	Erythrocyte membrane protein 1	0
University of Alberta, 4 Antigens, 20 aa Linear Peptides (PEP20215042037)	4	46	RLCTYNLENLKFDKIRDNNA	Erythrocyte membrane protein 1	0
University of Alberta, 4 Antigens, 20 aa Linear Peptides (PEP20215042037)	4	47	LCTYNLENLKFDKIRDNNAF	Erythrocyte membrane protein 1	0
University of Alberta, 4 Antigens, 20 aa Linear Peptides (PEP20215042037)	4	48	CTYNLENLKFDKIRDNNAFL	Erythrocyte membrane protein 1	0
University of Alberta, 4 Antigens, 20 aa Linear Peptides (PEP20215042037)	4	49	TYNLENLKFDKIRDNNAFLA	Erythrocyte membrane protein 1	0
University of Alberta, 4 Antigens, 20 aa Linear Peptides (PEP20215042037)	4	50	YNLENLKFDKIRDNNAFLAD	Erythrocyte membrane protein 1	0
University of Alberta, 4 Antigens, 20 aa Linear Peptides (PEP20215042037)	4	51	NLENLKFDKIRDNNAFLADV	Erythrocyte membrane protein 1	0
University of Alberta, 4 Antigens, 20 aa Linear Peptides (PEP20215042037)	4	52	LENLKFDKIRDNNAFLADVL	Erythrocyte membrane protein 1	0
University of Alberta, 4 Antigens, 20 aa Linear Peptides (PEP20215042037)	4	53	ENLKFDKIRDNNAFLADVLL	Erythrocyte membrane protein 1	0
University of Alberta, 4 Antigens, 20 aa Linear Peptides (PEP20215042037)	4	54	NLKFDKIRDNNAFLADVLLT	Erythrocyte membrane protein 1	0
University of Alberta, 4 Antigens, 20 aa Linear Peptides (PEP20215042037)	4	55	LKFDKIRDNNAFLADVLLTA	Erythrocyte membrane protein 1	0
University of Alberta, 4 Antigens, 20 aa Linear Peptides (PEP20215042037)	4	56	KFDKIRDNNAFLADVLLTAR	Erythrocyte membrane protein 1	0
University of Alberta, 4 Antigens, 20 aa Linear Peptides (PEP20215042037)	4	57	FDKIRDNNAFLADVLLTARN	Erythrocyte membrane protein 1	0
University of Alberta, 4 Antigens, 20 aa Linear Peptides (PEP20215042037)	4	58	DKIRDNNAFLADVLLTARNE	Erythrocyte membrane protein 1	0
University of Alberta, 4 Antigens, 20 aa Linear Peptides (PEP20215042037)	4	59	KIRDNNAFLADVLLTARNEG	Erythrocyte membrane protein 1	0
University of Alberta, 4 Antigens, 20 aa Linear Peptides (PEP20215042037)	4	60	IRDNNAFLADVLLTARNEGE	Erythrocyte membrane protein 1	0
University of Alberta, 4 Antigens, 20 aa Linear Peptides (PEP20215042037)	4	61	RDNNAFLADVLLTARNEGEK	Erythrocyte membrane protein 1	0
University of Alberta, 4 Antigens, 20 aa Linear Peptides (PEP20215042037)	4	62	DNNAFLADVLLTARNEGEKI	Erythrocyte membrane protein 1	0
University of Alberta, 4 Antigens, 20 aa Linear Peptides (PEP20215042037)	4	63	NNAFLADVLLTARNEGEKIV	Erythrocyte membrane protein 1	0
University of Alberta, 4 Antigens, 20 aa Linear Peptides (PEP20215042037)	4	64	NAFLADVLLTARNEGEKIVQ	Erythrocyte membrane protein 1	0
University of Alberta, 4 Antigens, 20 aa Linear Peptides (PEP20215042037)	4	65	AFLADVLLTARNEGEKIVQN	Erythrocyte membrane protein 1	0
University of Alberta, 4 Antigens, 20 aa Linear Peptides (PEP20215042037)	4	66	FLADVLLTARNEGEKIVQNH	Erythrocyte membrane protein 1	0
University of Alberta, 4 Antigens, 20 aa Linear Peptides (PEP20215042037)	4	67	LADVLLTARNEGEKIVQNHP	Erythrocyte membrane protein 1	0
University of Alberta, 4 Antigens, 20 aa Linear Peptides (PEP20215042037)	6	2	ADVLLTARNEGEKIVQNHPD	Erythrocyte membrane protein 1	0
University of Alberta, 4 Antigens, 20 aa Linear Peptides (PEP20215042037)	6	3	DVLLTARNEGEKIVQNHPDT	Erythrocyte membrane protein 1	0
University of Alberta, 4 Antigens, 20 aa Linear Peptides (PEP20215042037)	6	4	VLLTARNEGEKIVQNHPDTN	Erythrocyte membrane protein 1	0
University of Alberta, 4 Antigens, 20 aa Linear Peptides (PEP20215042037)	6	5	LLTARNEGEKIVQNHPDTNS	Erythrocyte membrane protein 1	0
University of Alberta, 4 Antigens, 20 aa Linear Peptides (PEP20215042037)	6	6	LTARNEGEKIVQNHPDTNSS	Erythrocyte membrane protein 1	0
University of Alberta, 4 Antigens, 20 aa Linear Peptides (PEP20215042037)	6	7	TARNEGEKIVQNHPDTNSSN	Erythrocyte membrane protein 1	0
University of Alberta, 4 Antigens, 20 aa Linear Peptides (PEP20215042037)	6	8	ARNEGEKIVQNHPDTNSSNV	Erythrocyte membrane protein 1	0
University of Alberta, 4 Antigens, 20 aa Linear Peptides (PEP20215042037)	6	9	RNEGEKIVQNHPDTNSSNVC	Erythrocyte membrane protein 1	0
University of Alberta, 4 Antigens, 20 aa Linear Peptides (PEP20215042037)	6	10	NEGEKIVQNHPDTNSSNVCN	Erythrocyte membrane protein 1	0
University of Alberta, 4 Antigens, 20 aa Linear Peptides (PEP20215042037)	6	11	EGEKIVQNHPDTNSSNVCNA	Erythrocyte membrane protein 1	0
University of Alberta, 4 Antigens, 20 aa Linear Peptides (PEP20215042037)	6	12	GEKIVQNHPDTNSSNVCNAL	Erythrocyte membrane protein 1	0
University of Alberta, 4 Antigens, 20 aa Linear Peptides (PEP20215042037)	6	13	EKIVQNHPDTNSSNVCNALE	Erythrocyte membrane protein 1	0
University of Alberta, 4 Antigens, 20 aa Linear Peptides (PEP20215042037)	6	14	KIVQNHPDTNSSNVCNALER	Erythrocyte membrane protein 1	0
University of Alberta, 4 Antigens, 20 aa Linear Peptides (PEP20215042037)	6	15	IVQNHPDTNSSNVCNALERS	Erythrocyte membrane protein 1	0
University of Alberta, 4 Antigens, 20 aa Linear Peptides (PEP20215042037)	6	16	VQNHPDTNSSNVCNALERSF	Erythrocyte membrane protein 1	0
University of Alberta, 4 Antigens, 20 aa Linear Peptides (PEP20215042037)	6	17	QNHPDTNSSNVCNALERSFA	Erythrocyte membrane protein 1	0
University of Alberta, 4 Antigens, 20 aa Linear Peptides (PEP20215042037)	6	18	NHPDTNSSNVCNALERSFAD	Erythrocyte membrane protein 1	0
University of Alberta, 4 Antigens, 20 aa Linear Peptides (PEP20215042037)	6	19	HPDTNSSNVCNALERSFADL	Erythrocyte membrane protein 1	0
University of Alberta, 4 Antigens, 20 aa Linear Peptides (PEP20215042037)	6	20	PDTNSSNVCNALERSFADLA	Erythrocyte membrane protein 1	0
University of Alberta, 4 Antigens, 20 aa Linear Peptides (PEP20215042037)	6	21	DTNSSNVCNALERSFADLAD	Erythrocyte membrane protein 1	0
University of Alberta, 4 Antigens, 20 aa Linear Peptides (PEP20215042037)	6	22	TNSSNVCNALERSFADLADI	Erythrocyte membrane protein 1	2.5
University of Alberta, 4 Antigens, 20 aa Linear Peptides (PEP20215042037)	6	23	NSSNVCNALERSFADLADII	Erythrocyte membrane protein 1	0
University of Alberta, 4 Antigens, 20 aa Linear Peptides (PEP20215042037)	6	24	SSNVCNALERSFADLADIIR	Erythrocyte membrane protein 1	0
University of Alberta, 4 Antigens, 20 aa Linear Peptides (PEP20215042037)	6	25	SNVCNALERSFADLADIIRG	Erythrocyte membrane protein 1	0
University of Alberta, 4 Antigens, 20 aa Linear Peptides (PEP20215042037)	6	26	NVCNALERSFADLADIIRGT	Erythrocyte membrane protein 1	0
University of Alberta, 4 Antigens, 20 aa Linear Peptides (PEP20215042037)	6	27	VCNALERSFADLADIIRGTD	Erythrocyte membrane protein 1	0
University of Alberta, 4 Antigens, 20 aa Linear Peptides (PEP20215042037)	6	28	CNALERSFADLADIIRGTDQ	Erythrocyte membrane protein 1	0
University of Alberta, 4 Antigens, 20 aa Linear Peptides (PEP20215042037)	6	29	NALERSFADLADIIRGTDQW	Erythrocyte membrane protein 1	0
University of Alberta, 4 Antigens, 20 aa Linear Peptides (PEP20215042037)	6	30	ALERSFADLADIIRGTDQWK	Erythrocyte membrane protein 1	0
University of Alberta, 4 Antigens, 20 aa Linear Peptides (PEP20215042037)	6	31	LERSFADLADIIRGTDQWKG	Erythrocyte membrane protein 1	0
University of Alberta, 4 Antigens, 20 aa Linear Peptides (PEP20215042037)	6	32	ERSFADLADIIRGTDQWKGT	Erythrocyte membrane protein 1	0
University of Alberta, 4 Antigens, 20 aa Linear Peptides (PEP20215042037)	6	33	RSFADLADIIRGTDQWKGTN	Erythrocyte membrane protein 1	1.5
University of Alberta, 4 Antigens, 20 aa Linear Peptides (PEP20215042037)	6	34	SFADLADIIRGTDQWKGTNS	Erythrocyte membrane protein 1	0
University of Alberta, 4 Antigens, 20 aa Linear Peptides (PEP20215042037)	6	35	FADLADIIRGTDQWKGTNSN	Erythrocyte membrane protein 1	0
University of Alberta, 4 Antigens, 20 aa Linear Peptides (PEP20215042037)	6	36	ADLADIIRGTDQWKGTNSNL	Erythrocyte membrane protein 1	2.5
University of Alberta, 4 Antigens, 20 aa Linear Peptides (PEP20215042037)	6	37	DLADIIRGTDQWKGTNSNLE	Erythrocyte membrane protein 1	0
University of Alberta, 4 Antigens, 20 aa Linear Peptides (PEP20215042037)	6	38	LADIIRGTDQWKGTNSNLEK	Erythrocyte membrane protein 1	0
University of Alberta, 4 Antigens, 20 aa Linear Peptides (PEP20215042037)	6	39	ADIIRGTDQWKGTNSNLEKN	Erythrocyte membrane protein 1	0
University of Alberta, 4 Antigens, 20 aa Linear Peptides (PEP20215042037)	6	40	DIIRGTDQWKGTNSNLEKNL	Erythrocyte membrane protein 1	0
University of Alberta, 4 Antigens, 20 aa Linear Peptides (PEP20215042037)	6	41	IIRGTDQWKGTNSNLEKNLK	Erythrocyte membrane protein 1	0
University of Alberta, 4 Antigens, 20 aa Linear Peptides (PEP20215042037)	6	42	IRGTDQWKGTNSNLEKNLKQ	Erythrocyte membrane protein 1	1
University of Alberta, 4 Antigens, 20 aa Linear Peptides (PEP20215042037)	6	43	RGTDQWKGTNSNLEKNLKQM	Erythrocyte membrane protein 1	0
University of Alberta, 4 Antigens, 20 aa Linear Peptides (PEP20215042037)	6	44	GTDQWKGTNSNLEKNLKQMF	Erythrocyte membrane protein 1	0
University of Alberta, 4 Antigens, 20 aa Linear Peptides (PEP20215042037)	6	45	TDQWKGTNSNLEKNLKQMFA	Erythrocyte membrane protein 1	0
University of Alberta, 4 Antigens, 20 aa Linear Peptides (PEP20215042037)	6	46	DQWKGTNSNLEKNLKQMFAK	Erythrocyte membrane protein 1	0
University of Alberta, 4 Antigens, 20 aa Linear Peptides (PEP20215042037)	6	47	QWKGTNSNLEKNLKQMFAKI	Erythrocyte membrane protein 1	100
University of Alberta, 4 Antigens, 20 aa Linear Peptides (PEP20215042037)	6	48	WKGTNSNLEKNLKQMFAKIR	Erythrocyte membrane protein 1	0
University of Alberta, 4 Antigens, 20 aa Linear Peptides (PEP20215042037)	6	49	KGTNSNLEKNLKQMFAKIRE	Erythrocyte membrane protein 1	4
University of Alberta, 4 Antigens, 20 aa Linear Peptides (PEP20215042037)	6	50	GTNSNLEKNLKQMFAKIREN	Erythrocyte membrane protein 1	0
University of Alberta, 4 Antigens, 20 aa Linear Peptides (PEP20215042037)	6	51	TNSNLEKNLKQMFAKIREND	Erythrocyte membrane protein 1	0
University of Alberta, 4 Antigens, 20 aa Linear Peptides (PEP20215042037)	6	52	NSNLEKNLKQMFAKIRENDK	Erythrocyte membrane protein 1	0
University of Alberta, 4 Antigens, 20 aa Linear Peptides (PEP20215042037)	6	53	SNLEKNLKQMFAKIRENDKV	Erythrocyte membrane protein 1	1.5
University of Alberta, 4 Antigens, 20 aa Linear Peptides (PEP20215042037)	6	54	NLEKNLKQMFAKIRENDKVL	Erythrocyte membrane protein 1	0
University of Alberta, 4 Antigens, 20 aa Linear Peptides (PEP20215042037)	6	55	LEKNLKQMFAKIRENDKVLQ	Erythrocyte membrane protein 1	0
University of Alberta, 4 Antigens, 20 aa Linear Peptides (PEP20215042037)	6	56	EKNLKQMFAKIRENDKVLQD	Erythrocyte membrane protein 1	0
University of Alberta, 4 Antigens, 20 aa Linear Peptides (PEP20215042037)	6	57	KNLKQMFAKIRENDKVLQDK	Erythrocyte membrane protein 1	0
University of Alberta, 4 Antigens, 20 aa Linear Peptides (PEP20215042037)	6	58	NLKQMFAKIRENDKVLQDKY	Erythrocyte membrane protein 1	0
University of Alberta, 4 Antigens, 20 aa Linear Peptides (PEP20215042037)	6	59	LKQMFAKIRENDKVLQDKYP	Erythrocyte membrane protein 1	0
University of Alberta, 4 Antigens, 20 aa Linear Peptides (PEP20215042037)	6	60	KQMFAKIRENDKVLQDKYPK	Erythrocyte membrane protein 1	0
University of Alberta, 4 Antigens, 20 aa Linear Peptides (PEP20215042037)	6	61	QMFAKIRENDKVLQDKYPKD	Erythrocyte membrane protein 1	0
University of Alberta, 4 Antigens, 20 aa Linear Peptides (PEP20215042037)	6	62	MFAKIRENDKVLQDKYPKDQ	Erythrocyte membrane protein 1	0
University of Alberta, 4 Antigens, 20 aa Linear Peptides (PEP20215042037)	6	63	FAKIRENDKVLQDKYPKDQK	Erythrocyte membrane protein 1	0
University of Alberta, 4 Antigens, 20 aa Linear Peptides (PEP20215042037)	6	64	AKIRENDKVLQDKYPKDQKY	Erythrocyte membrane protein 1	1
University of Alberta, 4 Antigens, 20 aa Linear Peptides (PEP20215042037)	6	65	KIRENDKVLQDKYPKDQKYT	Erythrocyte membrane protein 1	0
University of Alberta, 4 Antigens, 20 aa Linear Peptides (PEP20215042037)	6	66	IRENDKVLQDKYPKDQKYTK	Erythrocyte membrane protein 1	252.5
University of Alberta, 4 Antigens, 20 aa Linear Peptides (PEP20215042037)	6	67	RENDKVLQDKYPKDQKYTKL	Erythrocyte membrane protein 1	406
University of Alberta, 4 Antigens, 20 aa Linear Peptides (PEP20215042037)	8	2	ENDKVLQDKYPKDQKYTKLR	Erythrocyte membrane protein 1	2216
University of Alberta, 4 Antigens, 20 aa Linear Peptides (PEP20215042037)	8	3	NDKVLQDKYPKDQKYTKLRE	Erythrocyte membrane protein 1	125.75
University of Alberta, 4 Antigens, 20 aa Linear Peptides (PEP20215042037)	8	4	DKVLQDKYPKDQKYTKLREA	Erythrocyte membrane protein 1	82.25
University of Alberta, 4 Antigens, 20 aa Linear Peptides (PEP20215042037)	8	5	KVLQDKYPKDQKYTKLREAW	Erythrocyte membrane protein 1	0
University of Alberta, 4 Antigens, 20 aa Linear Peptides (PEP20215042037)	8	6	VLQDKYPKDQKYTKLREAWW	Erythrocyte membrane protein 1	93.75
University of Alberta, 4 Antigens, 20 aa Linear Peptides (PEP20215042037)	8	7	LQDKYPKDQKYTKLREAWWN	Erythrocyte membrane protein 1	0
University of Alberta, 4 Antigens, 20 aa Linear Peptides (PEP20215042037)	8	8	QDKYPKDQKYTKLREAWWNA	Erythrocyte membrane protein 1	0
University of Alberta, 4 Antigens, 20 aa Linear Peptides (PEP20215042037)	8	9	DKYPKDQKYTKLREAWWNAN	Erythrocyte membrane protein 1	0
University of Alberta, 4 Antigens, 20 aa Linear Peptides (PEP20215042037)	8	10	KYPKDQKYTKLREAWWNANR	Erythrocyte membrane protein 1	0
University of Alberta, 4 Antigens, 20 aa Linear Peptides (PEP20215042037)	8	11	YPKDQKYTKLREAWWNANRQ	Erythrocyte membrane protein 1	0
University of Alberta, 4 Antigens, 20 aa Linear Peptides (PEP20215042037)	8	12	PKDQKYTKLREAWWNANRQK	Erythrocyte membrane protein 1	0
University of Alberta, 4 Antigens, 20 aa Linear Peptides (PEP20215042037)	8	13	KDQKYTKLREAWWNANRQKV	Erythrocyte membrane protein 1	1.5
University of Alberta, 4 Antigens, 20 aa Linear Peptides (PEP20215042037)	8	14	DQKYTKLREAWWNANRQKVW	Erythrocyte membrane protein 1	0
University of Alberta, 4 Antigens, 20 aa Linear Peptides (PEP20215042037)	8	15	QKYTKLREAWWNANRQKVWE	Erythrocyte membrane protein 1	0
University of Alberta, 4 Antigens, 20 aa Linear Peptides (PEP20215042037)	8	16	KYTKLREAWWNANRQKVWEV	Erythrocyte membrane protein 1	0
University of Alberta, 4 Antigens, 20 aa Linear Peptides (PEP20215042037)	8	17	YTKLREAWWNANRQKVWEVI	Erythrocyte membrane protein 1	0
University of Alberta, 4 Antigens, 20 aa Linear Peptides (PEP20215042037)	8	18	TKLREAWWNANRQKVWEVIT	Erythrocyte membrane protein 1	0
University of Alberta, 4 Antigens, 20 aa Linear Peptides (PEP20215042037)	8	19	KLREAWWNANRQKVWEVITC	Erythrocyte membrane protein 1	0
University of Alberta, 4 Antigens, 20 aa Linear Peptides (PEP20215042037)	8	20	LREAWWNANRQKVWEVITCG	Erythrocyte membrane protein 1	0
University of Alberta, 4 Antigens, 20 aa Linear Peptides (PEP20215042037)	8	21	REAWWNANRQKVWEVITCGA	Erythrocyte membrane protein 1	0
University of Alberta, 4 Antigens, 20 aa Linear Peptides (PEP20215042037)	8	22	EAWWNANRQKVWEVITCGAR	Erythrocyte membrane protein 1	0
University of Alberta, 4 Antigens, 20 aa Linear Peptides (PEP20215042037)	8	23	AWWNANRQKVWEVITCGARS	Erythrocyte membrane protein 1	0
University of Alberta, 4 Antigens, 20 aa Linear Peptides (PEP20215042037)	8	24	WWNANRQKVWEVITCGARSN	Erythrocyte membrane protein 1	1
University of Alberta, 4 Antigens, 20 aa Linear Peptides (PEP20215042037)	8	25	WNANRQKVWEVITCGARSND	Erythrocyte membrane protein 1	0
University of Alberta, 4 Antigens, 20 aa Linear Peptides (PEP20215042037)	8	26	NANRQKVWEVITCGARSNDL	Erythrocyte membrane protein 1	0
University of Alberta, 4 Antigens, 20 aa Linear Peptides (PEP20215042037)	8	27	ANRQKVWEVITCGARSNDLL	Erythrocyte membrane protein 1	0
University of Alberta, 4 Antigens, 20 aa Linear Peptides (PEP20215042037)	8	28	NRQKVWEVITCGARSNDLLI	Erythrocyte membrane protein 1	0
University of Alberta, 4 Antigens, 20 aa Linear Peptides (PEP20215042037)	8	29	RQKVWEVITCGARSNDLLIK	Erythrocyte membrane protein 1	0
University of Alberta, 4 Antigens, 20 aa Linear Peptides (PEP20215042037)	8	30	QKVWEVITCGARSNDLLIKR	Erythrocyte membrane protein 1	0
University of Alberta, 4 Antigens, 20 aa Linear Peptides (PEP20215042037)	8	31	KVWEVITCGARSNDLLIKRG	Erythrocyte membrane protein 1	0
University of Alberta, 4 Antigens, 20 aa Linear Peptides (PEP20215042037)	8	32	VWEVITCGARSNDLLIKRGW	Erythrocyte membrane protein 1	4.25
University of Alberta, 4 Antigens, 20 aa Linear Peptides (PEP20215042037)	8	33	WEVITCGARSNDLLIKRGWR	Erythrocyte membrane protein 1	0
University of Alberta, 4 Antigens, 20 aa Linear Peptides (PEP20215042037)	8	34	EVITCGARSNDLLIKRGWRT	Erythrocyte membrane protein 1	0
University of Alberta, 4 Antigens, 20 aa Linear Peptides (PEP20215042037)	8	35	VITCGARSNDLLIKRGWRTS	Erythrocyte membrane protein 1	0
University of Alberta, 4 Antigens, 20 aa Linear Peptides (PEP20215042037)	8	36	ITCGARSNDLLIKRGWRTSG	Erythrocyte membrane protein 1	0
University of Alberta, 4 Antigens, 20 aa Linear Peptides (PEP20215042037)	8	37	TCGARSNDLLIKRGWRTSGK	Erythrocyte membrane protein 1	0
University of Alberta, 4 Antigens, 20 aa Linear Peptides (PEP20215042037)	8	38	CGARSNDLLIKRGWRTSGKS	Erythrocyte membrane protein 1	0
University of Alberta, 4 Antigens, 20 aa Linear Peptides (PEP20215042037)	8	39	GARSNDLLIKRGWRTSGKSD	Erythrocyte membrane protein 1	0
University of Alberta, 4 Antigens, 20 aa Linear Peptides (PEP20215042037)	8	40	ARSNDLLIKRGWRTSGKSDR	Erythrocyte membrane protein 1	0
University of Alberta, 4 Antigens, 20 aa Linear Peptides (PEP20215042037)	8	41	RSNDLLIKRGWRTSGKSDRK	Erythrocyte membrane protein 1	0
University of Alberta, 4 Antigens, 20 aa Linear Peptides (PEP20215042037)	8	42	SNDLLIKRGWRTSGKSDRKK	Erythrocyte membrane protein 1	0
University of Alberta, 4 Antigens, 20 aa Linear Peptides (PEP20215042037)	8	43	NDLLIKRGWRTSGKSDRKKN	Erythrocyte membrane protein 1	0
University of Alberta, 4 Antigens, 20 aa Linear Peptides (PEP20215042037)	8	44	DLLIKRGWRTSGKSDRKKNF	Erythrocyte membrane protein 1	0
University of Alberta, 4 Antigens, 20 aa Linear Peptides (PEP20215042037)	8	45	LLIKRGWRTSGKSDRKKNFE	Erythrocyte membrane protein 1	0
University of Alberta, 4 Antigens, 20 aa Linear Peptides (PEP20215042037)	8	46	LIKRGWRTSGKSDRKKNFEL	Erythrocyte membrane protein 1	0
University of Alberta, 4 Antigens, 20 aa Linear Peptides (PEP20215042037)	8	47	IKRGWRTSGKSDRKKNFELC	Erythrocyte membrane protein 1	0
University of Alberta, 4 Antigens, 20 aa Linear Peptides (PEP20215042037)	8	48	KRGWRTSGKSDRKKNFELCR	Erythrocyte membrane protein 1	0
University of Alberta, 4 Antigens, 20 aa Linear Peptides (PEP20215042037)	8	49	RGWRTSGKSDRKKNFELCRK	Erythrocyte membrane protein 1	0
University of Alberta, 4 Antigens, 20 aa Linear Peptides (PEP20215042037)	8	50	GWRTSGKSDRKKNFELCRKC	Erythrocyte membrane protein 1	0
University of Alberta, 4 Antigens, 20 aa Linear Peptides (PEP20215042037)	8	51	WRTSGKSDRKKNFELCRKCG	Erythrocyte membrane protein 1	0
University of Alberta, 4 Antigens, 20 aa Linear Peptides (PEP20215042037)	8	52	RTSGKSDRKKNFELCRKCGH	Erythrocyte membrane protein 1	0
University of Alberta, 4 Antigens, 20 aa Linear Peptides (PEP20215042037)	8	53	TSGKSDRKKNFELCRKCGHY	Erythrocyte membrane protein 1	0
University of Alberta, 4 Antigens, 20 aa Linear Peptides (PEP20215042037)	8	54	SGKSDRKKNFELCRKCGHYE	Erythrocyte membrane protein 1	0
University of Alberta, 4 Antigens, 20 aa Linear Peptides (PEP20215042037)	8	55	GKSDRKKNFELCRKCGHYEK	Erythrocyte membrane protein 1	0
University of Alberta, 4 Antigens, 20 aa Linear Peptides (PEP20215042037)	8	56	KSDRKKNFELCRKCGHYEKE	Erythrocyte membrane protein 1	0
University of Alberta, 4 Antigens, 20 aa Linear Peptides (PEP20215042037)	8	57	SDRKKNFELCRKCGHYEKEV	Erythrocyte membrane protein 1	0
University of Alberta, 4 Antigens, 20 aa Linear Peptides (PEP20215042037)	8	58	DRKKNFELCRKCGHYEKEVP	Erythrocyte membrane protein 1	0
University of Alberta, 4 Antigens, 20 aa Linear Peptides (PEP20215042037)	8	59	RKKNFELCRKCGHYEKEVPT	Erythrocyte membrane protein 1	0
University of Alberta, 4 Antigens, 20 aa Linear Peptides (PEP20215042037)	8	60	KKNFELCRKCGHYEKEVPTK	Erythrocyte membrane protein 1	3
University of Alberta, 4 Antigens, 20 aa Linear Peptides (PEP20215042037)	8	61	KNFELCRKCGHYEKEVPTKL	Erythrocyte membrane protein 1	0
University of Alberta, 4 Antigens, 20 aa Linear Peptides (PEP20215042037)	8	62	NFELCRKCGHYEKEVPTKLD	Erythrocyte membrane protein 1	0
University of Alberta, 4 Antigens, 20 aa Linear Peptides (PEP20215042037)	8	63	FELCRKCGHYEKEVPTKLDY	Erythrocyte membrane protein 1	0
University of Alberta, 4 Antigens, 20 aa Linear Peptides (PEP20215042037)	8	64	ELCRKCGHYEKEVPTKLDYV	Erythrocyte membrane protein 1	0
University of Alberta, 4 Antigens, 20 aa Linear Peptides (PEP20215042037)	8	65	LCRKCGHYEKEVPTKLDYVP	Erythrocyte membrane protein 1	0
University of Alberta, 4 Antigens, 20 aa Linear Peptides (PEP20215042037)	8	66	CRKCGHYEKEVPTKLDYVPQ	Erythrocyte membrane protein 1	0
University of Alberta, 4 Antigens, 20 aa Linear Peptides (PEP20215042037)	8	67	RKCGHYEKEVPTKLDYVPQF	Erythrocyte membrane protein 1	0
University of Alberta, 4 Antigens, 20 aa Linear Peptides (PEP20215042037)	10	2	KCGHYEKEVPTKLDYVPQFL	Erythrocyte membrane protein 1	0
University of Alberta, 4 Antigens, 20 aa Linear Peptides (PEP20215042037)	10	3	CGHYEKEVPTKLDYVPQFLR	Erythrocyte membrane protein 1	0
University of Alberta, 4 Antigens, 20 aa Linear Peptides (PEP20215042037)	10	4	GHYEKEVPTKLDYVPQFLRW	Erythrocyte membrane protein 1	0
University of Alberta, 4 Antigens, 20 aa Linear Peptides (PEP20215042037)	10	5	HYEKEVPTKLDYVPQFLRWL	Erythrocyte membrane protein 1	0
University of Alberta, 4 Antigens, 20 aa Linear Peptides (PEP20215042037)	10	6	YEKEVPTKLDYVPQFLRWLT	Erythrocyte membrane protein 1	0
University of Alberta, 4 Antigens, 20 aa Linear Peptides (PEP20215042037)	10	7	EKEVPTKLDYVPQFLRWLTE	Erythrocyte membrane protein 1	0
University of Alberta, 4 Antigens, 20 aa Linear Peptides (PEP20215042037)	10	8	KEVPTKLDYVPQFLRWLTEW	Erythrocyte membrane protein 1	0
University of Alberta, 4 Antigens, 20 aa Linear Peptides (PEP20215042037)	10	9	EVPTKLDYVPQFLRWLTEWI	Erythrocyte membrane protein 1	0
University of Alberta, 4 Antigens, 20 aa Linear Peptides (PEP20215042037)	10	10	VPTKLDYVPQFLRWLTEWIE	Erythrocyte membrane protein 1	0
University of Alberta, 4 Antigens, 20 aa Linear Peptides (PEP20215042037)	10	11	PTKLDYVPQFLRWLTEWIED	Erythrocyte membrane protein 1	0
University of Alberta, 4 Antigens, 20 aa Linear Peptides (PEP20215042037)	10	12	TKLDYVPQFLRWLTEWIEDF	Erythrocyte membrane protein 1	0
University of Alberta, 4 Antigens, 20 aa Linear Peptides (PEP20215042037)	10	13	KLDYVPQFLRWLTEWIEDFY	Erythrocyte membrane protein 1	0
University of Alberta, 4 Antigens, 20 aa Linear Peptides (PEP20215042037)	10	14	LDYVPQFLRWLTEWIEDFYR	Erythrocyte membrane protein 1	0
University of Alberta, 4 Antigens, 20 aa Linear Peptides (PEP20215042037)	10	15	DYVPQFLRWLTEWIEDFYRE	Erythrocyte membrane protein 1	0
University of Alberta, 4 Antigens, 20 aa Linear Peptides (PEP20215042037)	10	16	YVPQFLRWLTEWIEDFYREK	Erythrocyte membrane protein 1	0
University of Alberta, 4 Antigens, 20 aa Linear Peptides (PEP20215042037)	10	17	VPQFLRWLTEWIEDFYREKQ	Erythrocyte membrane protein 1	0
University of Alberta, 4 Antigens, 20 aa Linear Peptides (PEP20215042037)	10	18	PQFLRWLTEWIEDFYREKQN	Erythrocyte membrane protein 1	0
University of Alberta, 4 Antigens, 20 aa Linear Peptides (PEP20215042037)	10	19	QFLRWLTEWIEDFYREKQNL	Erythrocyte membrane protein 1	1
University of Alberta, 4 Antigens, 20 aa Linear Peptides (PEP20215042037)	10	20	FLRWLTEWIEDFYREKQNLI	Erythrocyte membrane protein 1	1
University of Alberta, 4 Antigens, 20 aa Linear Peptides (PEP20215042037)	10	21	LRWLTEWIEDFYREKQNLID	Erythrocyte membrane protein 1	0
University of Alberta, 4 Antigens, 20 aa Linear Peptides (PEP20215042037)	10	22	RWLTEWIEDFYREKQNLIDD	Erythrocyte membrane protein 1	0
University of Alberta, 4 Antigens, 20 aa Linear Peptides (PEP20215042037)	10	23	WLTEWIEDFYREKQNLIDDM	Erythrocyte membrane protein 1	0
University of Alberta, 4 Antigens, 20 aa Linear Peptides (PEP20215042037)	10	24	LTEWIEDFYREKQNLIDDME	Erythrocyte membrane protein 1	0
University of Alberta, 4 Antigens, 20 aa Linear Peptides (PEP20215042037)	10	25	TEWIEDFYREKQNLIDDMER	Erythrocyte membrane protein 1	0
University of Alberta, 4 Antigens, 20 aa Linear Peptides (PEP20215042037)	10	26	EWIEDFYREKQNLIDDMERH	Erythrocyte membrane protein 1	0
University of Alberta, 4 Antigens, 20 aa Linear Peptides (PEP20215042037)	10	27	WIEDFYREKQNLIDDMERHR	Erythrocyte membrane protein 1	0
University of Alberta, 4 Antigens, 20 aa Linear Peptides (PEP20215042037)	10	28	IEDFYREKQNLIDDMERHRE	Erythrocyte membrane protein 1	2.5
University of Alberta, 4 Antigens, 20 aa Linear Peptides (PEP20215042037)	10	29	EDFYREKQNLIDDMERHREE	Erythrocyte membrane protein 1	0
University of Alberta, 4 Antigens, 20 aa Linear Peptides (PEP20215042037)	10	30	DFYREKQNLIDDMERHREEC	Erythrocyte membrane protein 1	0
University of Alberta, 4 Antigens, 20 aa Linear Peptides (PEP20215042037)	10	31	FYREKQNLIDDMERHREECT	Erythrocyte membrane protein 1	0
University of Alberta, 4 Antigens, 20 aa Linear Peptides (PEP20215042037)	10	32	YREKQNLIDDMERHREECTR	Erythrocyte membrane protein 1	0
University of Alberta, 4 Antigens, 20 aa Linear Peptides (PEP20215042037)	10	33	REKQNLIDDMERHREECTRE	Erythrocyte membrane protein 1	0
University of Alberta, 4 Antigens, 20 aa Linear Peptides (PEP20215042037)	10	34	EKQNLIDDMERHREECTRED	Erythrocyte membrane protein 1	0
University of Alberta, 4 Antigens, 20 aa Linear Peptides (PEP20215042037)	10	35	KQNLIDDMERHREECTREDH	Erythrocyte membrane protein 1	0
University of Alberta, 4 Antigens, 20 aa Linear Peptides (PEP20215042037)	10	36	QNLIDDMERHREECTREDHK	Erythrocyte membrane protein 1	0
University of Alberta, 4 Antigens, 20 aa Linear Peptides (PEP20215042037)	10	37	NLIDDMERHREECTREDHKS	Erythrocyte membrane protein 1	0
University of Alberta, 4 Antigens, 20 aa Linear Peptides (PEP20215042037)	10	38	LIDDMERHREECTREDHKSK	Erythrocyte membrane protein 1	0
University of Alberta, 4 Antigens, 20 aa Linear Peptides (PEP20215042037)	10	39	IDDMERHREECTREDHKSKE	Erythrocyte membrane protein 1	0
University of Alberta, 4 Antigens, 20 aa Linear Peptides (PEP20215042037)	10	40	DDMERHREECTREDHKSKEG	Erythrocyte membrane protein 1	0
University of Alberta, 4 Antigens, 20 aa Linear Peptides (PEP20215042037)	10	41	DMERHREECTREDHKSKEGT	Erythrocyte membrane protein 1	0
University of Alberta, 4 Antigens, 20 aa Linear Peptides (PEP20215042037)	10	42	MERHREECTREDHKSKEGTS	Erythrocyte membrane protein 1	1.5
University of Alberta, 4 Antigens, 20 aa Linear Peptides (PEP20215042037)	10	43	ERHREECTREDHKSKEGTSY	Erythrocyte membrane protein 1	0
University of Alberta, 4 Antigens, 20 aa Linear Peptides (PEP20215042037)	10	44	RHREECTREDHKSKEGTSYC	Erythrocyte membrane protein 1	0
University of Alberta, 4 Antigens, 20 aa Linear Peptides (PEP20215042037)	10	45	HREECTREDHKSKEGTSYCS	Erythrocyte membrane protein 1	0.75
University of Alberta, 4 Antigens, 20 aa Linear Peptides (PEP20215042037)	10	46	REECTREDHKSKEGTSYCST	Erythrocyte membrane protein 1	0
University of Alberta, 4 Antigens, 20 aa Linear Peptides (PEP20215042037)	10	47	EECTREDHKSKEGTSYCSTC	Erythrocyte membrane protein 1	0
University of Alberta, 4 Antigens, 20 aa Linear Peptides (PEP20215042037)	10	48	ECTREDHKSKEGTSYCSTCK	Erythrocyte membrane protein 1	0
University of Alberta, 4 Antigens, 20 aa Linear Peptides (PEP20215042037)	10	49	CTREDHKSKEGTSYCSTCKD	Erythrocyte membrane protein 1	0
University of Alberta, 4 Antigens, 20 aa Linear Peptides (PEP20215042037)	10	50	TREDHKSKEGTSYCSTCKDK	Erythrocyte membrane protein 1	0
University of Alberta, 4 Antigens, 20 aa Linear Peptides (PEP20215042037)	10	51	REDHKSKEGTSYCSTCKDKC	Erythrocyte membrane protein 1	4.25
University of Alberta, 4 Antigens, 20 aa Linear Peptides (PEP20215042037)	10	52	EDHKSKEGTSYCSTCKDKCK	Erythrocyte membrane protein 1	0
University of Alberta, 4 Antigens, 20 aa Linear Peptides (PEP20215042037)	10	53	DHKSKEGTSYCSTCKDKCKK	Erythrocyte membrane protein 1	0
University of Alberta, 4 Antigens, 20 aa Linear Peptides (PEP20215042037)	10	54	HKSKEGTSYCSTCKDKCKKY	Erythrocyte membrane protein 1	97.5
University of Alberta, 4 Antigens, 20 aa Linear Peptides (PEP20215042037)	10	55	KSKEGTSYCSTCKDKCKKYC	Erythrocyte membrane protein 1	4
University of Alberta, 4 Antigens, 20 aa Linear Peptides (PEP20215042037)	10	56	SKEGTSYCSTCKDKCKKYCE	Erythrocyte membrane protein 1	0
University of Alberta, 4 Antigens, 20 aa Linear Peptides (PEP20215042037)	10	57	KEGTSYCSTCKDKCKKYCEC	Erythrocyte membrane protein 1	0
University of Alberta, 4 Antigens, 20 aa Linear Peptides (PEP20215042037)	10	58	EGTSYCSTCKDKCKKYCECV	Erythrocyte membrane protein 1	0
University of Alberta, 4 Antigens, 20 aa Linear Peptides (PEP20215042037)	10	59	GTSYCSTCKDKCKKYCECVK	Erythrocyte membrane protein 1	0
University of Alberta, 4 Antigens, 20 aa Linear Peptides (PEP20215042037)	10	60	TSYCSTCKDKCKKYCECVKK	Erythrocyte membrane protein 1	0
University of Alberta, 4 Antigens, 20 aa Linear Peptides (PEP20215042037)	10	61	SYCSTCKDKCKKYCECVKKW	Erythrocyte membrane protein 1	0
University of Alberta, 4 Antigens, 20 aa Linear Peptides (PEP20215042037)	10	62	YCSTCKDKCKKYCECVKKWK	Erythrocyte membrane protein 1	0
University of Alberta, 4 Antigens, 20 aa Linear Peptides (PEP20215042037)	10	63	CSTCKDKCKKYCECVKKWKT	Erythrocyte membrane protein 1	96.5
University of Alberta, 4 Antigens, 20 aa Linear Peptides (PEP20215042037)	10	64	STCKDKCKKYCECVKKWKTE	Erythrocyte membrane protein 1	0
University of Alberta, 4 Antigens, 20 aa Linear Peptides (PEP20215042037)	10	65	TCKDKCKKYCECVKKWKTEW	Erythrocyte membrane protein 1	0
University of Alberta, 4 Antigens, 20 aa Linear Peptides (PEP20215042037)	10	66	CKDKCKKYCECVKKWKTEWE	Erythrocyte membrane protein 1	0
University of Alberta, 4 Antigens, 20 aa Linear Peptides (PEP20215042037)	10	67	KDKCKKYCECVKKWKTEWEN	Erythrocyte membrane protein 1	0
University of Alberta, 4 Antigens, 20 aa Linear Peptides (PEP20215042037)	12	2	DKCKKYCECVKKWKTEWENQ	Erythrocyte membrane protein 1	0
University of Alberta, 4 Antigens, 20 aa Linear Peptides (PEP20215042037)	12	3	KCKKYCECVKKWKTEWENQE	Erythrocyte membrane protein 1	2.5
University of Alberta, 4 Antigens, 20 aa Linear Peptides (PEP20215042037)	12	4	CKKYCECVKKWKTEWENQEN	Erythrocyte membrane protein 1	0
University of Alberta, 4 Antigens, 20 aa Linear Peptides (PEP20215042037)	12	5	KKYCECVKKWKTEWENQENK	Erythrocyte membrane protein 1	0
University of Alberta, 4 Antigens, 20 aa Linear Peptides (PEP20215042037)	12	6	KYCECVKKWKTEWENQENKY	Erythrocyte membrane protein 1	0
University of Alberta, 4 Antigens, 20 aa Linear Peptides (PEP20215042037)	12	7	YCECVKKWKTEWENQENKYK	Erythrocyte membrane protein 1	181.25
University of Alberta, 4 Antigens, 20 aa Linear Peptides (PEP20215042037)	12	8	CECVKKWKTEWENQENKYKD	Erythrocyte membrane protein 1	0
University of Alberta, 4 Antigens, 20 aa Linear Peptides (PEP20215042037)	12	9	ECVKKWKTEWENQENKYKDL	Erythrocyte membrane protein 1	0
University of Alberta, 4 Antigens, 20 aa Linear Peptides (PEP20215042037)	12	10	CVKKWKTEWENQENKYKDLY	Erythrocyte membrane protein 1	0
University of Alberta, 4 Antigens, 20 aa Linear Peptides (PEP20215042037)	12	11	VKKWKTEWENQENKYKDLYE	Erythrocyte membrane protein 1	0
University of Alberta, 4 Antigens, 20 aa Linear Peptides (PEP20215042037)	12	12	KKWKTEWENQENKYKDLYEQ	Erythrocyte membrane protein 1	0
University of Alberta, 4 Antigens, 20 aa Linear Peptides (PEP20215042037)	12	13	KWKTEWENQENKYKDLYEQN	Erythrocyte membrane protein 1	0
University of Alberta, 4 Antigens, 20 aa Linear Peptides (PEP20215042037)	12	14	WKTEWENQENKYKDLYEQNK	Erythrocyte membrane protein 1	0
University of Alberta, 4 Antigens, 20 aa Linear Peptides (PEP20215042037)	12	15	KTEWENQENKYKDLYEQNKN	Erythrocyte membrane protein 1	0
University of Alberta, 4 Antigens, 20 aa Linear Peptides (PEP20215042037)	12	16	TEWENQENKYKDLYEQNKNK	Erythrocyte membrane protein 1	0
University of Alberta, 4 Antigens, 20 aa Linear Peptides (PEP20215042037)	12	17	EWENQENKYKDLYEQNKNKT	Erythrocyte membrane protein 1	0
University of Alberta, 4 Antigens, 20 aa Linear Peptides (PEP20215042037)	12	18	WENQENKYKDLYEQNKNKTS	Erythrocyte membrane protein 1	101.75
University of Alberta, 4 Antigens, 20 aa Linear Peptides (PEP20215042037)	12	19	ENQENKYKDLYEQNKNKTSQ	Erythrocyte membrane protein 1	0
University of Alberta, 4 Antigens, 20 aa Linear Peptides (PEP20215042037)	12	20	NQENKYKDLYEQNKNKTSQK	Erythrocyte membrane protein 1	385
University of Alberta, 4 Antigens, 20 aa Linear Peptides (PEP20215042037)	12	21	QENKYKDLYEQNKNKTSQKN	Erythrocyte membrane protein 1	0
University of Alberta, 4 Antigens, 20 aa Linear Peptides (PEP20215042037)	12	22	ENKYKDLYEQNKNKTSQKNT	Erythrocyte membrane protein 1	0
University of Alberta, 4 Antigens, 20 aa Linear Peptides (PEP20215042037)	12	23	NKYKDLYEQNKNKTSQKNTS	Erythrocyte membrane protein 1	0
University of Alberta, 4 Antigens, 20 aa Linear Peptides (PEP20215042037)	12	24	KYKDLYEQNKNKTSQKNTSR	Erythrocyte membrane protein 1	70.5
University of Alberta, 4 Antigens, 20 aa Linear Peptides (PEP20215042037)	12	25	YKDLYEQNKNKTSQKNTSRY	Erythrocyte membrane protein 1	0
University of Alberta, 4 Antigens, 20 aa Linear Peptides (PEP20215042037)	12	26	KDLYEQNKNKTSQKNTSRYD	Erythrocyte membrane protein 1	0
University of Alberta, 4 Antigens, 20 aa Linear Peptides (PEP20215042037)	12	27	DLYEQNKNKTSQKNTSRYDD	Erythrocyte membrane protein 1	0
University of Alberta, 4 Antigens, 20 aa Linear Peptides (PEP20215042037)	12	28	LYEQNKNKTSQKNTSRYDDY	Erythrocyte membrane protein 1	0
University of Alberta, 4 Antigens, 20 aa Linear Peptides (PEP20215042037)	12	29	YEQNKNKTSQKNTSRYDDYV	Erythrocyte membrane protein 1	0
University of Alberta, 4 Antigens, 20 aa Linear Peptides (PEP20215042037)	12	30	EQNKNKTSQKNTSRYDDYVK	Erythrocyte membrane protein 1	0
University of Alberta, 4 Antigens, 20 aa Linear Peptides (PEP20215042037)	12	31	QNKNKTSQKNTSRYDDYVKD	Erythrocyte membrane protein 1	0
University of Alberta, 4 Antigens, 20 aa Linear Peptides (PEP20215042037)	12	32	NKNKTSQKNTSRYDDYVKDF	Erythrocyte membrane protein 1	0
University of Alberta, 4 Antigens, 20 aa Linear Peptides (PEP20215042037)	12	33	KNKTSQKNTSRYDDYVKDFF	Erythrocyte membrane protein 1	0
University of Alberta, 4 Antigens, 20 aa Linear Peptides (PEP20215042037)	12	34	NKTSQKNTSRYDDYVKDFFE	Erythrocyte membrane protein 1	0
University of Alberta, 4 Antigens, 20 aa Linear Peptides (PEP20215042037)	12	35	KTSQKNTSRYDDYVKDFFEK	Erythrocyte membrane protein 1	3
University of Alberta, 4 Antigens, 20 aa Linear Peptides (PEP20215042037)	12	36	TSQKNTSRYDDYVKDFFEKL	Erythrocyte membrane protein 1	0
University of Alberta, 4 Antigens, 20 aa Linear Peptides (PEP20215042037)	12	37	SQKNTSRYDDYVKDFFEKLE	Erythrocyte membrane protein 1	2.75
University of Alberta, 4 Antigens, 20 aa Linear Peptides (PEP20215042037)	12	38	QKNTSRYDDYVKDFFEKLEA	Erythrocyte membrane protein 1	0
University of Alberta, 4 Antigens, 20 aa Linear Peptides (PEP20215042037)	12	39	KNTSRYDDYVKDFFEKLEAN	Erythrocyte membrane protein 1	0
University of Alberta, 4 Antigens, 20 aa Linear Peptides (PEP20215042037)	12	40	NTSRYDDYVKDFFEKLEANY	Erythrocyte membrane protein 1	0
University of Alberta, 4 Antigens, 20 aa Linear Peptides (PEP20215042037)	12	41	TSRYDDYVKDFFEKLEANYS	Erythrocyte membrane protein 1	0
University of Alberta, 4 Antigens, 20 aa Linear Peptides (PEP20215042037)	12	42	SRYDDYVKDFFEKLEANYSS	Erythrocyte membrane protein 1	0
University of Alberta, 4 Antigens, 20 aa Linear Peptides (PEP20215042037)	12	43	RYDDYVKDFFEKLEANYSSL	Erythrocyte membrane protein 1	0
University of Alberta, 4 Antigens, 20 aa Linear Peptides (PEP20215042037)	12	44	YDDYVKDFFEKLEANYSSLE	Erythrocyte membrane protein 1	0
University of Alberta, 4 Antigens, 20 aa Linear Peptides (PEP20215042037)	12	45	DDYVKDFFEKLEANYSSLEN	Erythrocyte membrane protein 1	0
University of Alberta, 4 Antigens, 20 aa Linear Peptides (PEP20215042037)	12	46	DYVKDFFEKLEANYSSLENY	Erythrocyte membrane protein 1	3.5
University of Alberta, 4 Antigens, 20 aa Linear Peptides (PEP20215042037)	12	47	YVKDFFEKLEANYSSLENYI	Erythrocyte membrane protein 1	0
University of Alberta, 4 Antigens, 20 aa Linear Peptides (PEP20215042037)	12	48	VKDFFEKLEANYSSLENYIK	Erythrocyte membrane protein 1	0
University of Alberta, 4 Antigens, 20 aa Linear Peptides (PEP20215042037)	12	49	KDFFEKLEANYSSLENYIKG	Erythrocyte membrane protein 1	0
University of Alberta, 4 Antigens, 20 aa Linear Peptides (PEP20215042037)	12	50	DFFEKLEANYSSLENYIKGD	Erythrocyte membrane protein 1	0
University of Alberta, 4 Antigens, 20 aa Linear Peptides (PEP20215042037)	12	51	FFEKLEANYSSLENYIKGDP	Erythrocyte membrane protein 1	0
University of Alberta, 4 Antigens, 20 aa Linear Peptides (PEP20215042037)	12	52	FEKLEANYSSLENYIKGDPY	Erythrocyte membrane protein 1	0
University of Alberta, 4 Antigens, 20 aa Linear Peptides (PEP20215042037)	12	53	EKLEANYSSLENYIKGDPYF	Erythrocyte membrane protein 1	0
University of Alberta, 4 Antigens, 20 aa Linear Peptides (PEP20215042037)	12	54	KLEANYSSLENYIKGDPYFA	Erythrocyte membrane protein 1	0
University of Alberta, 4 Antigens, 20 aa Linear Peptides (PEP20215042037)	12	55	LEANYSSLENYIKGDPYFAE	Erythrocyte membrane protein 1	0
University of Alberta, 4 Antigens, 20 aa Linear Peptides (PEP20215042037)	12	56	EANYSSLENYIKGDPYFAEY	Erythrocyte membrane protein 1	0
University of Alberta, 4 Antigens, 20 aa Linear Peptides (PEP20215042037)	12	57	ANYSSLENYIKGDPYFAEYA	Erythrocyte membrane protein 1	0
University of Alberta, 4 Antigens, 20 aa Linear Peptides (PEP20215042037)	12	58	NYSSLENYIKGDPYFAEYAT	Erythrocyte membrane protein 1	0
University of Alberta, 4 Antigens, 20 aa Linear Peptides (PEP20215042037)	12	59	YSSLENYIKGDPYFAEYATK	Erythrocyte membrane protein 1	0
University of Alberta, 4 Antigens, 20 aa Linear Peptides (PEP20215042037)	12	60	SSLENYIKGDPYFAEYATKL	Erythrocyte membrane protein 1	0
University of Alberta, 4 Antigens, 20 aa Linear Peptides (PEP20215042037)	12	61	SLENYIKGDPYFAEYATKLS	Erythrocyte membrane protein 1	0
University of Alberta, 4 Antigens, 20 aa Linear Peptides (PEP20215042037)	12	62	LENYIKGDPYFAEYATKLSF	Erythrocyte membrane protein 1	0
University of Alberta, 4 Antigens, 20 aa Linear Peptides (PEP20215042037)	12	63	ENYIKGDPYFAEYATKLSFI	Erythrocyte membrane protein 1	0
University of Alberta, 4 Antigens, 20 aa Linear Peptides (PEP20215042037)	12	64	NYIKGDPYFAEYATKLSFIL	Erythrocyte membrane protein 1	0
University of Alberta, 4 Antigens, 20 aa Linear Peptides (PEP20215042037)	12	65	YIKGDPYFAEYATKLSFILN	Erythrocyte membrane protein 1	0
University of Alberta, 4 Antigens, 20 aa Linear Peptides (PEP20215042037)	12	66	IKGDPYFAEYATKLSFILNP	Erythrocyte membrane protein 1	0
University of Alberta, 4 Antigens, 20 aa Linear Peptides (PEP20215042037)	12	67	KGDPYFAEYATKLSFILNPS	Erythrocyte membrane protein 1	0
University of Alberta, 4 Antigens, 20 aa Linear Peptides (PEP20215042037)	14	2	GDPYFAEYATKLSFILNPSD	Erythrocyte membrane protein 1	0
University of Alberta, 4 Antigens, 20 aa Linear Peptides (PEP20215042037)	14	3	DPYFAEYATKLSFILNPSDA	Erythrocyte membrane protein 1	0
University of Alberta, 4 Antigens, 20 aa Linear Peptides (PEP20215042037)	14	4	PYFAEYATKLSFILNPSDAN	Erythrocyte membrane protein 1	0
University of Alberta, 4 Antigens, 20 aa Linear Peptides (PEP20215042037)	14	5	YFAEYATKLSFILNPSDANN	Erythrocyte membrane protein 1	0
University of Alberta, 4 Antigens, 20 aa Linear Peptides (PEP20215042037)	14	6	FAEYATKLSFILNPSDANNP	Erythrocyte membrane protein 1	0
University of Alberta, 4 Antigens, 20 aa Linear Peptides (PEP20215042037)	14	7	AEYATKLSFILNPSDANNPS	Erythrocyte membrane protein 1	0
University of Alberta, 4 Antigens, 20 aa Linear Peptides (PEP20215042037)	14	8	EYATKLSFILNPSDANNPSG	Erythrocyte membrane protein 1	0
University of Alberta, 4 Antigens, 20 aa Linear Peptides (PEP20215042037)	14	9	YATKLSFILNPSDANNPSGE	Erythrocyte membrane protein 1	0
University of Alberta, 4 Antigens, 20 aa Linear Peptides (PEP20215042037)	14	10	ATKLSFILNPSDANNPSGET	Erythrocyte membrane protein 1	0
University of Alberta, 4 Antigens, 20 aa Linear Peptides (PEP20215042037)	14	11	TKLSFILNPSDANNPSGETA	Erythrocyte membrane protein 1	0
University of Alberta, 4 Antigens, 20 aa Linear Peptides (PEP20215042037)	14	12	KLSFILNPSDANNPSGETAN	Erythrocyte membrane protein 1	0
University of Alberta, 4 Antigens, 20 aa Linear Peptides (PEP20215042037)	14	13	LSFILNPSDANNPSGETANH	Erythrocyte membrane protein 1	0
University of Alberta, 4 Antigens, 20 aa Linear Peptides (PEP20215042037)	14	14	SFILNPSDANNPSGETANHN	Erythrocyte membrane protein 1	0
University of Alberta, 4 Antigens, 20 aa Linear Peptides (PEP20215042037)	14	15	FILNPSDANNPSGETANHND	Erythrocyte membrane protein 1	0
University of Alberta, 4 Antigens, 20 aa Linear Peptides (PEP20215042037)	14	16	ILNPSDANNPSGETANHNDE	Erythrocyte membrane protein 1	0
University of Alberta, 4 Antigens, 20 aa Linear Peptides (PEP20215042037)	14	17	LNPSDANNPSGETANHNDEA	Erythrocyte membrane protein 1	0
University of Alberta, 4 Antigens, 20 aa Linear Peptides (PEP20215042037)	14	18	NPSDANNPSGETANHNDEAC	Erythrocyte membrane protein 1	0
University of Alberta, 4 Antigens, 20 aa Linear Peptides (PEP20215042037)	14	19	PSDANNPSGETANHNDEACN	Erythrocyte membrane protein 1	0
University of Alberta, 4 Antigens, 20 aa Linear Peptides (PEP20215042037)	14	20	SDANNPSGETANHNDEACNC	Erythrocyte membrane protein 1	0
University of Alberta, 4 Antigens, 20 aa Linear Peptides (PEP20215042037)	14	21	DANNPSGETANHNDEACNCN	Erythrocyte membrane protein 1	0
University of Alberta, 4 Antigens, 20 aa Linear Peptides (PEP20215042037)	14	22	ANNPSGETANHNDEACNCNE	Erythrocyte membrane protein 1	0
University of Alberta, 4 Antigens, 20 aa Linear Peptides (PEP20215042037)	14	23	NNPSGETANHNDEACNCNES	Erythrocyte membrane protein 1	0
University of Alberta, 4 Antigens, 20 aa Linear Peptides (PEP20215042037)	14	24	NPSGETANHNDEACNCNESG	Erythrocyte membrane protein 1	0
University of Alberta, 4 Antigens, 20 aa Linear Peptides (PEP20215042037)	14	25	PSGETANHNDEACNCNESGI	Erythrocyte membrane protein 1	0
University of Alberta, 4 Antigens, 20 aa Linear Peptides (PEP20215042037)	14	26	SGETANHNDEACNCNESGIS	Erythrocyte membrane protein 1	0
University of Alberta, 4 Antigens, 20 aa Linear Peptides (PEP20215042037)	14	27	GETANHNDEACNCNESGISS	Erythrocyte membrane protein 1	0
University of Alberta, 4 Antigens, 20 aa Linear Peptides (PEP20215042037)	14	28	ETANHNDEACNCNESGISSV	Erythrocyte membrane protein 1	0
University of Alberta, 4 Antigens, 20 aa Linear Peptides (PEP20215042037)	14	29	TANHNDEACNCNESGISSVG	Erythrocyte membrane protein 1	0
University of Alberta, 4 Antigens, 20 aa Linear Peptides (PEP20215042037)	14	30	ANHNDEACNCNESGISSVGQ	Erythrocyte membrane protein 1	0
University of Alberta, 4 Antigens, 20 aa Linear Peptides (PEP20215042037)	14	31	NHNDEACNCNESGISSVGQA	Erythrocyte membrane protein 1	0
University of Alberta, 4 Antigens, 20 aa Linear Peptides (PEP20215042037)	14	32	HNDEACNCNESGISSVGQAQ	Erythrocyte membrane protein 1	9
University of Alberta, 4 Antigens, 20 aa Linear Peptides (PEP20215042037)	14	33	NDEACNCNESGISSVGQAQT	Erythrocyte membrane protein 1	0
University of Alberta, 4 Antigens, 20 aa Linear Peptides (PEP20215042037)	14	34	DEACNCNESGISSVGQAQTS	Erythrocyte membrane protein 1	0
University of Alberta, 4 Antigens, 20 aa Linear Peptides (PEP20215042037)	14	35	EACNCNESGISSVGQAQTSG	Erythrocyte membrane protein 1	0
University of Alberta, 4 Antigens, 20 aa Linear Peptides (PEP20215042037)	14	36	ACNCNESGISSVGQAQTSGP	Erythrocyte membrane protein 1	2.5
University of Alberta, 4 Antigens, 20 aa Linear Peptides (PEP20215042037)	14	37	CNCNESGISSVGQAQTSGPS	Erythrocyte membrane protein 1	0
University of Alberta, 4 Antigens, 20 aa Linear Peptides (PEP20215042037)	14	38	NCNESGISSVGQAQTSGPSS	Erythrocyte membrane protein 1	0
University of Alberta, 4 Antigens, 20 aa Linear Peptides (PEP20215042037)	14	39	CNESGISSVGQAQTSGPSSN	Erythrocyte membrane protein 1	0
University of Alberta, 4 Antigens, 20 aa Linear Peptides (PEP20215042037)	14	40	NESGISSVGQAQTSGPSSNK	Erythrocyte membrane protein 1	0
University of Alberta, 4 Antigens, 20 aa Linear Peptides (PEP20215042037)	14	41	ESGISSVGQAQTSGPSSNKT	Erythrocyte membrane protein 1	0
University of Alberta, 4 Antigens, 20 aa Linear Peptides (PEP20215042037)	14	42	SGISSVGQAQTSGPSSNKTC	Erythrocyte membrane protein 1	0
University of Alberta, 4 Antigens, 20 aa Linear Peptides (PEP20215042037)	14	43	GISSVGQAQTSGPSSNKTCI	Erythrocyte membrane protein 1	0
University of Alberta, 4 Antigens, 20 aa Linear Peptides (PEP20215042037)	14	44	ISSVGQAQTSGPSSNKTCIT	Erythrocyte membrane protein 1	0
University of Alberta, 4 Antigens, 20 aa Linear Peptides (PEP20215042037)	14	45	SSVGQAQTSGPSSNKTCITH	Erythrocyte membrane protein 1	0
University of Alberta, 4 Antigens, 20 aa Linear Peptides (PEP20215042037)	14	46	SVGQAQTSGPSSNKTCITHS	Erythrocyte membrane protein 1	0
University of Alberta, 4 Antigens, 20 aa Linear Peptides (PEP20215042037)	14	47	VGQAQTSGPSSNKTCITHSS	Erythrocyte membrane protein 1	0
University of Alberta, 4 Antigens, 20 aa Linear Peptides (PEP20215042037)	14	48	GQAQTSGPSSNKTCITHSSI	Erythrocyte membrane protein 1	0
University of Alberta, 4 Antigens, 20 aa Linear Peptides (PEP20215042037)	14	49	QAQTSGPSSNKTCITHSSIK	Erythrocyte membrane protein 1	0
University of Alberta, 4 Antigens, 20 aa Linear Peptides (PEP20215042037)	14	50	AQTSGPSSNKTCITHSSIKT	Erythrocyte membrane protein 1	0
University of Alberta, 4 Antigens, 20 aa Linear Peptides (PEP20215042037)	14	51	QTSGPSSNKTCITHSSIKTN	Erythrocyte membrane protein 1	0
University of Alberta, 4 Antigens, 20 aa Linear Peptides (PEP20215042037)	14	52	TSGPSSNKTCITHSSIKTNK	Erythrocyte membrane protein 1	0
University of Alberta, 4 Antigens, 20 aa Linear Peptides (PEP20215042037)	14	53	SGPSSNKTCITHSSIKTNKK	Erythrocyte membrane protein 1	0
University of Alberta, 4 Antigens, 20 aa Linear Peptides (PEP20215042037)	14	54	GPSSNKTCITHSSIKTNKKK	Erythrocyte membrane protein 1	0
University of Alberta, 4 Antigens, 20 aa Linear Peptides (PEP20215042037)	14	55	PSSNKTCITHSSIKTNKKKE	Erythrocyte membrane protein 1	0
University of Alberta, 4 Antigens, 20 aa Linear Peptides (PEP20215042037)	14	56	SSNKTCITHSSIKTNKKKEC	Erythrocyte membrane protein 1	0
University of Alberta, 4 Antigens, 20 aa Linear Peptides (PEP20215042037)	14	57	SNKTCITHSSIKTNKKKECK	Erythrocyte membrane protein 1	0
University of Alberta, 4 Antigens, 20 aa Linear Peptides (PEP20215042037)	14	58	NKTCITHSSIKTNKKKECKD	Erythrocyte membrane protein 1	0
University of Alberta, 4 Antigens, 20 aa Linear Peptides (PEP20215042037)	14	59	KTCITHSSIKTNKKKECKDV	Erythrocyte membrane protein 1	0
University of Alberta, 4 Antigens, 20 aa Linear Peptides (PEP20215042037)	14	60	TCITHSSIKTNKKKECKDVK	Erythrocyte membrane protein 1	0
University of Alberta, 4 Antigens, 20 aa Linear Peptides (PEP20215042037)	14	61	CITHSSIKTNKKKECKDVKL	Erythrocyte membrane protein 1	78
University of Alberta, 4 Antigens, 20 aa Linear Peptides (PEP20215042037)	14	62	ITHSSIKTNKKKECKDVKLG	Erythrocyte membrane protein 1	0
University of Alberta, 4 Antigens, 20 aa Linear Peptides (PEP20215042037)	14	63	THSSIKTNKKKECKDVKLGV	Erythrocyte membrane protein 1	90.75
University of Alberta, 4 Antigens, 20 aa Linear Peptides (PEP20215042037)	14	64	HSSIKTNKKKECKDVKLGVR	Erythrocyte membrane protein 1	91.5
University of Alberta, 4 Antigens, 20 aa Linear Peptides (PEP20215042037)	14	65	SSIKTNKKKECKDVKLGVRE	Erythrocyte membrane protein 1	0
University of Alberta, 4 Antigens, 20 aa Linear Peptides (PEP20215042037)	14	66	SIKTNKKKECKDVKLGVREN	Erythrocyte membrane protein 1	0
University of Alberta, 4 Antigens, 20 aa Linear Peptides (PEP20215042037)	14	67	IKTNKKKECKDVKLGVREND	Erythrocyte membrane protein 1	0
University of Alberta, 4 Antigens, 20 aa Linear Peptides (PEP20215042037)	16	2	KTNKKKECKDVKLGVRENDK	Erythrocyte membrane protein 1	0
University of Alberta, 4 Antigens, 20 aa Linear Peptides (PEP20215042037)	16	3	TNKKKECKDVKLGVRENDKD	Erythrocyte membrane protein 1	0
University of Alberta, 4 Antigens, 20 aa Linear Peptides (PEP20215042037)	16	4	NKKKECKDVKLGVRENDKDL	Erythrocyte membrane protein 1	0
University of Alberta, 4 Antigens, 20 aa Linear Peptides (PEP20215042037)	16	5	KKKECKDVKLGVRENDKDLK	Erythrocyte membrane protein 1	0
University of Alberta, 4 Antigens, 20 aa Linear Peptides (PEP20215042037)	16	6	KKECKDVKLGVRENDKDLKI	Erythrocyte membrane protein 1	0
University of Alberta, 4 Antigens, 20 aa Linear Peptides (PEP20215042037)	16	7	KECKDVKLGVRENDKDLKIC	Erythrocyte membrane protein 1	0
University of Alberta, 4 Antigens, 20 aa Linear Peptides (PEP20215042037)	16	8	ECKDVKLGVRENDKDLKICV	Erythrocyte membrane protein 1	0
University of Alberta, 4 Antigens, 20 aa Linear Peptides (PEP20215042037)	16	9	CKDVKLGVRENDKDLKICVI	Erythrocyte membrane protein 1	0
University of Alberta, 4 Antigens, 20 aa Linear Peptides (PEP20215042037)	16	10	KDVKLGVRENDKDLKICVIE	Erythrocyte membrane protein 1	0
University of Alberta, 4 Antigens, 20 aa Linear Peptides (PEP20215042037)	16	11	DVKLGVRENDKDLKICVIED	Erythrocyte membrane protein 1	0
University of Alberta, 4 Antigens, 20 aa Linear Peptides (PEP20215042037)	16	12	VKLGVRENDKDLKICVIEDT	Erythrocyte membrane protein 1	0
University of Alberta, 4 Antigens, 20 aa Linear Peptides (PEP20215042037)	16	13	KLGVRENDKDLKICVIEDTS	Erythrocyte membrane protein 1	0
University of Alberta, 4 Antigens, 20 aa Linear Peptides (PEP20215042037)	16	14	LGVRENDKDLKICVIEDTSL	Erythrocyte membrane protein 1	0
University of Alberta, 4 Antigens, 20 aa Linear Peptides (PEP20215042037)	16	15	GVRENDKDLKICVIEDTSLS	Erythrocyte membrane protein 1	0
University of Alberta, 4 Antigens, 20 aa Linear Peptides (PEP20215042037)	16	16	VRENDKDLKICVIEDTSLSG	Erythrocyte membrane protein 1	0
University of Alberta, 4 Antigens, 20 aa Linear Peptides (PEP20215042037)	16	17	RENDKDLKICVIEDTSLSGV	Erythrocyte membrane protein 1	0
University of Alberta, 4 Antigens, 20 aa Linear Peptides (PEP20215042037)	16	18	ENDKDLKICVIEDTSLSGVD	Erythrocyte membrane protein 1	0
University of Alberta, 4 Antigens, 20 aa Linear Peptides (PEP20215042037)	16	19	NDKDLKICVIEDTSLSGVDN	Erythrocyte membrane protein 1	0
University of Alberta, 4 Antigens, 20 aa Linear Peptides (PEP20215042037)	16	20	DKDLKICVIEDTSLSGVDNC	Erythrocyte membrane protein 1	0
University of Alberta, 4 Antigens, 20 aa Linear Peptides (PEP20215042037)	16	21	KDLKICVIEDTSLSGVDNCC	Erythrocyte membrane protein 1	0
University of Alberta, 4 Antigens, 20 aa Linear Peptides (PEP20215042037)	16	22	DLKICVIEDTSLSGVDNCCC	Erythrocyte membrane protein 1	0
University of Alberta, 4 Antigens, 20 aa Linear Peptides (PEP20215042037)	16	23	LKICVIEDTSLSGVDNCCCQ	Erythrocyte membrane protein 1	0
University of Alberta, 4 Antigens, 20 aa Linear Peptides (PEP20215042037)	16	24	KICVIEDTSLSGVDNCCCQD	Erythrocyte membrane protein 1	3
University of Alberta, 4 Antigens, 20 aa Linear Peptides (PEP20215042037)	16	25	ICVIEDTSLSGVDNCCCQDL	Erythrocyte membrane protein 1	0
University of Alberta, 4 Antigens, 20 aa Linear Peptides (PEP20215042037)	16	26	CVIEDTSLSGVDNCCCQDLL	Erythrocyte membrane protein 1	0
University of Alberta, 4 Antigens, 20 aa Linear Peptides (PEP20215042037)	16	27	VIEDTSLSGVDNCCCQDLLG	Erythrocyte membrane protein 1	0
University of Alberta, 4 Antigens, 20 aa Linear Peptides (PEP20215042037)	16	28	IEDTSLSGVDNCCCQDLLGI	Erythrocyte membrane protein 1	0
University of Alberta, 4 Antigens, 20 aa Linear Peptides (PEP20215042037)	16	29	EDTSLSGVDNCCCQDLLGIL	Erythrocyte membrane protein 1	0
University of Alberta, 4 Antigens, 20 aa Linear Peptides (PEP20215042037)	16	30	DTSLSGVDNCCCQDLLGILQ	Erythrocyte membrane protein 1	0
University of Alberta, 4 Antigens, 20 aa Linear Peptides (PEP20215042037)	16	31	TSLSGVDNCCCQDLLGILQE	Erythrocyte membrane protein 1	0
University of Alberta, 4 Antigens, 20 aa Linear Peptides (PEP20215042037)	16	32	SLSGVDNCCCQDLLGILQEN	Erythrocyte membrane protein 1	0
University of Alberta, 4 Antigens, 20 aa Linear Peptides (PEP20215042037)	16	33	LSGVDNCCCQDLLGILQENC	Erythrocyte membrane protein 1	3
University of Alberta, 4 Antigens, 20 aa Linear Peptides (PEP20215042037)	16	34	SGVDNCCCQDLLGILQENCS	Erythrocyte membrane protein 1	0
University of Alberta, 4 Antigens, 20 aa Linear Peptides (PEP20215042037)	16	35	GVDNCCCQDLLGILQENCSD	Erythrocyte membrane protein 1	0
University of Alberta, 4 Antigens, 20 aa Linear Peptides (PEP20215042037)	16	36	VDNCCCQDLLGILQENCSDN	Erythrocyte membrane protein 1	0
University of Alberta, 4 Antigens, 20 aa Linear Peptides (PEP20215042037)	16	37	DNCCCQDLLGILQENCSDNK	Erythrocyte membrane protein 1	0
University of Alberta, 4 Antigens, 20 aa Linear Peptides (PEP20215042037)	16	38	NCCCQDLLGILQENCSDNKR	Erythrocyte membrane protein 1	0
University of Alberta, 4 Antigens, 20 aa Linear Peptides (PEP20215042037)	16	39	CCCQDLLGILQENCSDNKRG	Erythrocyte membrane protein 1	0
University of Alberta, 4 Antigens, 20 aa Linear Peptides (PEP20215042037)	16	40	CCQDLLGILQENCSDNKRGS	Erythrocyte membrane protein 1	0
University of Alberta, 4 Antigens, 20 aa Linear Peptides (PEP20215042037)	16	41	CQDLLGILQENCSDNKRGSS	Erythrocyte membrane protein 1	0
University of Alberta, 4 Antigens, 20 aa Linear Peptides (PEP20215042037)	16	42	QDLLGILQENCSDNKRGSSS	Erythrocyte membrane protein 1	0
University of Alberta, 4 Antigens, 20 aa Linear Peptides (PEP20215042037)	16	43	DLLGILQENCSDNKRGSSSN	Erythrocyte membrane protein 1	0
University of Alberta, 4 Antigens, 20 aa Linear Peptides (PEP20215042037)	16	44	LLGILQENCSDNKRGSSSND	Erythrocyte membrane protein 1	0
University of Alberta, 4 Antigens, 20 aa Linear Peptides (PEP20215042037)	16	45	LGILQENCSDNKRGSSSNDS	Erythrocyte membrane protein 1	0
University of Alberta, 4 Antigens, 20 aa Linear Peptides (PEP20215042037)	16	46	GILQENCSDNKRGSSSNDSC	Erythrocyte membrane protein 1	0
University of Alberta, 4 Antigens, 20 aa Linear Peptides (PEP20215042037)	16	47	ILQENCSDNKRGSSSNDSCD	Erythrocyte membrane protein 1	0
University of Alberta, 4 Antigens, 20 aa Linear Peptides (PEP20215042037)	16	48	LQENCSDNKRGSSSNDSCDN	Erythrocyte membrane protein 1	0
University of Alberta, 4 Antigens, 20 aa Linear Peptides (PEP20215042037)	16	49	QENCSDNKRGSSSNDSCDNK	Erythrocyte membrane protein 1	0
University of Alberta, 4 Antigens, 20 aa Linear Peptides (PEP20215042037)	16	50	ENCSDNKRGSSSNDSCDNKN	Erythrocyte membrane protein 1	0
University of Alberta, 4 Antigens, 20 aa Linear Peptides (PEP20215042037)	16	51	NCSDNKRGSSSNDSCDNKNQ	Erythrocyte membrane protein 1	0
University of Alberta, 4 Antigens, 20 aa Linear Peptides (PEP20215042037)	16	52	CSDNKRGSSSNDSCDNKNQD	Erythrocyte membrane protein 1	0
University of Alberta, 4 Antigens, 20 aa Linear Peptides (PEP20215042037)	16	53	SDNKRGSSSNDSCDNKNQDE	Erythrocyte membrane protein 1	0
University of Alberta, 4 Antigens, 20 aa Linear Peptides (PEP20215042037)	16	54	DNKRGSSSNDSCDNKNQDEC	Erythrocyte membrane protein 1	0
University of Alberta, 4 Antigens, 20 aa Linear Peptides (PEP20215042037)	16	55	NKRGSSSNDSCDNKNQDECQ	Erythrocyte membrane protein 1	0
University of Alberta, 4 Antigens, 20 aa Linear Peptides (PEP20215042037)	16	56	KRGSSSNDSCDNKNQDECQK	Erythrocyte membrane protein 1	0
University of Alberta, 4 Antigens, 20 aa Linear Peptides (PEP20215042037)	16	57	RGSSSNDSCDNKNQDECQKK	Erythrocyte membrane protein 1	0
University of Alberta, 4 Antigens, 20 aa Linear Peptides (PEP20215042037)	16	58	GSSSNDSCDNKNQDECQKKL	Erythrocyte membrane protein 1	0
University of Alberta, 4 Antigens, 20 aa Linear Peptides (PEP20215042037)	16	59	SSSNDSCDNKNQDECQKKLE	Erythrocyte membrane protein 1	0
University of Alberta, 4 Antigens, 20 aa Linear Peptides (PEP20215042037)	16	60	SSNDSCDNKNQDECQKKLEK	Erythrocyte membrane protein 1	0
University of Alberta, 4 Antigens, 20 aa Linear Peptides (PEP20215042037)	16	61	SNDSCDNKNQDECQKKLEKV	Erythrocyte membrane protein 1	0
University of Alberta, 4 Antigens, 20 aa Linear Peptides (PEP20215042037)	16	62	NDSCDNKNQDECQKKLEKVF	Erythrocyte membrane protein 1	0
University of Alberta, 4 Antigens, 20 aa Linear Peptides (PEP20215042037)	16	63	DSCDNKNQDECQKKLEKVFA	Erythrocyte membrane protein 1	0
University of Alberta, 4 Antigens, 20 aa Linear Peptides (PEP20215042037)	16	64	SCDNKNQDECQKKLEKVFAS	Erythrocyte membrane protein 1	0
University of Alberta, 4 Antigens, 20 aa Linear Peptides (PEP20215042037)	16	65	CDNKNQDECQKKLEKVFASL	Erythrocyte membrane protein 1	0
University of Alberta, 4 Antigens, 20 aa Linear Peptides (PEP20215042037)	16	66	DNKNQDECQKKLEKVFASLT	Erythrocyte membrane protein 1	0
University of Alberta, 4 Antigens, 20 aa Linear Peptides (PEP20215042037)	16	67	NKNQDECQKKLEKVFASLTN	Erythrocyte membrane protein 1	0
University of Alberta, 4 Antigens, 20 aa Linear Peptides (PEP20215042037)	18	2	KNQDECQKKLEKVFASLTNG	Erythrocyte membrane protein 1	0
University of Alberta, 4 Antigens, 20 aa Linear Peptides (PEP20215042037)	18	3	NQDECQKKLEKVFASLTNGY	Erythrocyte membrane protein 1	1.5
University of Alberta, 4 Antigens, 20 aa Linear Peptides (PEP20215042037)	18	4	QDECQKKLEKVFASLTNGYK	Erythrocyte membrane protein 1	0
University of Alberta, 4 Antigens, 20 aa Linear Peptides (PEP20215042037)	18	5	DECQKKLEKVFASLTNGYKC	Erythrocyte membrane protein 1	0
University of Alberta, 4 Antigens, 20 aa Linear Peptides (PEP20215042037)	18	6	ECQKKLEKVFASLTNGYKCD	Erythrocyte membrane protein 1	0
University of Alberta, 4 Antigens, 20 aa Linear Peptides (PEP20215042037)	18	7	CQKKLEKVFASLTNGYKCDK	Erythrocyte membrane protein 1	81
University of Alberta, 4 Antigens, 20 aa Linear Peptides (PEP20215042037)	18	8	QKKLEKVFASLTNGYKCDKC	Erythrocyte membrane protein 1	0
University of Alberta, 4 Antigens, 20 aa Linear Peptides (PEP20215042037)	18	9	KKLEKVFASLTNGYKCDKCK	Erythrocyte membrane protein 1	98
University of Alberta, 4 Antigens, 20 aa Linear Peptides (PEP20215042037)	18	10	KLEKVFASLTNGYKCDKCKS	Erythrocyte membrane protein 1	91.5
University of Alberta, 4 Antigens, 20 aa Linear Peptides (PEP20215042037)	18	11	LEKVFASLTNGYKCDKCKSG	Erythrocyte membrane protein 1	0
University of Alberta, 4 Antigens, 20 aa Linear Peptides (PEP20215042037)	18	12	EKVFASLTNGYKCDKCKSGT	Erythrocyte membrane protein 1	0
University of Alberta, 4 Antigens, 20 aa Linear Peptides (PEP20215042037)	18	13	KVFASLTNGYKCDKCKSGTS	Erythrocyte membrane protein 1	83.5
University of Alberta, 4 Antigens, 20 aa Linear Peptides (PEP20215042037)	18	14	VFASLTNGYKCDKCKSGTSR	Erythrocyte membrane protein 1	93.5
University of Alberta, 4 Antigens, 20 aa Linear Peptides (PEP20215042037)	18	15	FASLTNGYKCDKCKSGTSRS	Erythrocyte membrane protein 1	145
University of Alberta, 4 Antigens, 20 aa Linear Peptides (PEP20215042037)	18	16	ASLTNGYKCDKCKSGTSRSK	Erythrocyte membrane protein 1	156
University of Alberta, 4 Antigens, 20 aa Linear Peptides (PEP20215042037)	18	17	SLTNGYKCDKCKSGTSRSKK	Erythrocyte membrane protein 1	139.5
University of Alberta, 4 Antigens, 20 aa Linear Peptides (PEP20215042037)	18	18	LTNGYKCDKCKSGTSRSKKK	Erythrocyte membrane protein 1	107.25
University of Alberta, 4 Antigens, 20 aa Linear Peptides (PEP20215042037)	18	19	TNGYKCDKCKSGTSRSKKKW	Erythrocyte membrane protein 1	0
University of Alberta, 4 Antigens, 20 aa Linear Peptides (PEP20215042037)	18	20	NGYKCDKCKSGTSRSKKKWI	Erythrocyte membrane protein 1	1.5
University of Alberta, 4 Antigens, 20 aa Linear Peptides (PEP20215042037)	18	21	GYKCDKCKSGTSRSKKKWIW	Erythrocyte membrane protein 1	0
University of Alberta, 4 Antigens, 20 aa Linear Peptides (PEP20215042037)	18	22	YKCDKCKSGTSRSKKKWIWK	Erythrocyte membrane protein 1	0
University of Alberta, 4 Antigens, 20 aa Linear Peptides (PEP20215042037)	18	23	KCDKCKSGTSRSKKKWIWKK	Erythrocyte membrane protein 1	0
University of Alberta, 4 Antigens, 20 aa Linear Peptides (PEP20215042037)	18	24	CDKCKSGTSRSKKKWIWKKS	Erythrocyte membrane protein 1	0
University of Alberta, 4 Antigens, 20 aa Linear Peptides (PEP20215042037)	18	25	DKCKSGTSRSKKKWIWKKSS	Erythrocyte membrane protein 1	0
University of Alberta, 4 Antigens, 20 aa Linear Peptides (PEP20215042037)	18	26	KCKSGTSRSKKKWIWKKSSG	Erythrocyte membrane protein 1	0
University of Alberta, 4 Antigens, 20 aa Linear Peptides (PEP20215042037)	18	27	CKSGTSRSKKKWIWKKSSGN	Erythrocyte membrane protein 1	0
University of Alberta, 4 Antigens, 20 aa Linear Peptides (PEP20215042037)	18	28	KSGTSRSKKKWIWKKSSGNE	Erythrocyte membrane protein 1	0
University of Alberta, 4 Antigens, 20 aa Linear Peptides (PEP20215042037)	18	29	SGTSRSKKKWIWKKSSGNEE	Erythrocyte membrane protein 1	0
University of Alberta, 4 Antigens, 20 aa Linear Peptides (PEP20215042037)	18	30	GTSRSKKKWIWKKSSGNEEG	Erythrocyte membrane protein 1	0
University of Alberta, 4 Antigens, 20 aa Linear Peptides (PEP20215042037)	18	31	TSRSKKKWIWKKSSGNEEGL	Erythrocyte membrane protein 1	0
University of Alberta, 4 Antigens, 20 aa Linear Peptides (PEP20215042037)	18	32	SRSKKKWIWKKSSGNEEGLQ	Erythrocyte membrane protein 1	0
University of Alberta, 4 Antigens, 20 aa Linear Peptides (PEP20215042037)	18	33	RSKKKWIWKKSSGNEEGLQE	Erythrocyte membrane protein 1	0
University of Alberta, 4 Antigens, 20 aa Linear Peptides (PEP20215042037)	18	34	SKKKWIWKKSSGNEEGLQEE	Erythrocyte membrane protein 1	0
University of Alberta, 4 Antigens, 20 aa Linear Peptides (PEP20215042037)	18	35	KKKWIWKKSSGNEEGLQEEY	Erythrocyte membrane protein 1	0
University of Alberta, 4 Antigens, 20 aa Linear Peptides (PEP20215042037)	18	36	KKWIWKKSSGNEEGLQEEYA	Erythrocyte membrane protein 1	0
University of Alberta, 4 Antigens, 20 aa Linear Peptides (PEP20215042037)	18	37	KWIWKKSSGNEEGLQEEYAN	Erythrocyte membrane protein 1	0
University of Alberta, 4 Antigens, 20 aa Linear Peptides (PEP20215042037)	18	38	WIWKKSSGNEEGLQEEYANT	Erythrocyte membrane protein 1	0
University of Alberta, 4 Antigens, 20 aa Linear Peptides (PEP20215042037)	18	39	IWKKSSGNEEGLQEEYANTI	Erythrocyte membrane protein 1	0
University of Alberta, 4 Antigens, 20 aa Linear Peptides (PEP20215042037)	18	40	WKKSSGNEEGLQEEYANTIG	Erythrocyte membrane protein 1	0
University of Alberta, 4 Antigens, 20 aa Linear Peptides (PEP20215042037)	18	41	KKSSGNEEGLQEEYANTIGL	Erythrocyte membrane protein 1	0
University of Alberta, 4 Antigens, 20 aa Linear Peptides (PEP20215042037)	18	42	KSSGNEEGLQEEYANTIGLP	Erythrocyte membrane protein 1	0
University of Alberta, 4 Antigens, 20 aa Linear Peptides (PEP20215042037)	18	43	SSGNEEGLQEEYANTIGLPP	Erythrocyte membrane protein 1	0
University of Alberta, 4 Antigens, 20 aa Linear Peptides (PEP20215042037)	18	44	SGNEEGLQEEYANTIGLPPR	Erythrocyte membrane protein 1	0
University of Alberta, 4 Antigens, 20 aa Linear Peptides (PEP20215042037)	18	45	GNEEGLQEEYANTIGLPPRT	Erythrocyte membrane protein 1	0
University of Alberta, 4 Antigens, 20 aa Linear Peptides (PEP20215042037)	18	46	NEEGLQEEYANTIGLPPRTQ	Erythrocyte membrane protein 1	0
University of Alberta, 4 Antigens, 20 aa Linear Peptides (PEP20215042037)	18	47	EEGLQEEYANTIGLPPRTQS	Erythrocyte membrane protein 1	0
University of Alberta, 4 Antigens, 20 aa Linear Peptides (PEP20215042037)	18	48	EGLQEEYANTIGLPPRTQSL	Erythrocyte membrane protein 1	0
University of Alberta, 4 Antigens, 20 aa Linear Peptides (PEP20215042037)	18	49	GLQEEYANTIGLPPRTQSLY	Erythrocyte membrane protein 1	0
University of Alberta, 4 Antigens, 20 aa Linear Peptides (PEP20215042037)	18	50	LQEEYANTIGLPPRTQSLYL	Erythrocyte membrane protein 1	0
University of Alberta, 4 Antigens, 20 aa Linear Peptides (PEP20215042037)	18	51	QEEYANTIGLPPRTQSLYLG	Erythrocyte membrane protein 1	0
University of Alberta, 4 Antigens, 20 aa Linear Peptides (PEP20215042037)	18	52	EEYANTIGLPPRTQSLYLGN	Erythrocyte membrane protein 1	0
University of Alberta, 4 Antigens, 20 aa Linear Peptides (PEP20215042037)	18	53	EYANTIGLPPRTQSLYLGNL	Erythrocyte membrane protein 1	0
University of Alberta, 4 Antigens, 20 aa Linear Peptides (PEP20215042037)	18	54	YANTIGLPPRTQSLYLGNLP	Erythrocyte membrane protein 1	0
University of Alberta, 4 Antigens, 20 aa Linear Peptides (PEP20215042037)	18	55	ANTIGLPPRTQSLYLGNLPK	Erythrocyte membrane protein 1	0
University of Alberta, 4 Antigens, 20 aa Linear Peptides (PEP20215042037)	18	56	NTIGLPPRTQSLYLGNLPKL	Erythrocyte membrane protein 1	0
University of Alberta, 4 Antigens, 20 aa Linear Peptides (PEP20215042037)	18	57	TIGLPPRTQSLYLGNLPKLE	Erythrocyte membrane protein 1	0
University of Alberta, 4 Antigens, 20 aa Linear Peptides (PEP20215042037)	18	58	IGLPPRTQSLYLGNLPKLEN	Erythrocyte membrane protein 1	0
University of Alberta, 4 Antigens, 20 aa Linear Peptides (PEP20215042037)	18	59	GLPPRTQSLYLGNLPKLENV	Erythrocyte membrane protein 1	0
University of Alberta, 4 Antigens, 20 aa Linear Peptides (PEP20215042037)	18	60	LPPRTQSLYLGNLPKLENVC	Erythrocyte membrane protein 1	0
University of Alberta, 4 Antigens, 20 aa Linear Peptides (PEP20215042037)	18	61	PPRTQSLYLGNLPKLENVCE	Erythrocyte membrane protein 1	0
University of Alberta, 4 Antigens, 20 aa Linear Peptides (PEP20215042037)	18	62	PRTQSLYLGNLPKLENVCED	Erythrocyte membrane protein 1	0
University of Alberta, 4 Antigens, 20 aa Linear Peptides (PEP20215042037)	18	63	RTQSLYLGNLPKLENVCEDV	Erythrocyte membrane protein 1	0
University of Alberta, 4 Antigens, 20 aa Linear Peptides (PEP20215042037)	18	64	TQSLYLGNLPKLENVCEDVK	Erythrocyte membrane protein 1	0
University of Alberta, 4 Antigens, 20 aa Linear Peptides (PEP20215042037)	18	65	QSLYLGNLPKLENVCEDVKD	Erythrocyte membrane protein 1	0
University of Alberta, 4 Antigens, 20 aa Linear Peptides (PEP20215042037)	18	66	SLYLGNLPKLENVCEDVKDI	Erythrocyte membrane protein 1	0
University of Alberta, 4 Antigens, 20 aa Linear Peptides (PEP20215042037)	18	67	LYLGNLPKLENVCEDVKDIN	Erythrocyte membrane protein 1	0
University of Alberta, 4 Antigens, 20 aa Linear Peptides (PEP20215042037)	20	2	YLGNLPKLENVCEDVKDINF	Erythrocyte membrane protein 1	0
University of Alberta, 4 Antigens, 20 aa Linear Peptides (PEP20215042037)	20	3	LGNLPKLENVCEDVKDINFD	Erythrocyte membrane protein 1	0
University of Alberta, 4 Antigens, 20 aa Linear Peptides (PEP20215042037)	20	4	GNLPKLENVCEDVKDINFDT	Erythrocyte membrane protein 1	0
University of Alberta, 4 Antigens, 20 aa Linear Peptides (PEP20215042037)	20	5	NLPKLENVCEDVKDINFDTK	Erythrocyte membrane protein 1	0
University of Alberta, 4 Antigens, 20 aa Linear Peptides (PEP20215042037)	20	6	LPKLENVCEDVKDINFDTKE	Erythrocyte membrane protein 1	0
University of Alberta, 4 Antigens, 20 aa Linear Peptides (PEP20215042037)	20	7	PKLENVCEDVKDINFDTKEK	Erythrocyte membrane protein 1	0
University of Alberta, 4 Antigens, 20 aa Linear Peptides (PEP20215042037)	20	8	KLENVCEDVKDINFDTKEKF	Erythrocyte membrane protein 1	0
University of Alberta, 4 Antigens, 20 aa Linear Peptides (PEP20215042037)	20	9	LENVCEDVKDINFDTKEKFL	Erythrocyte membrane protein 1	0
University of Alberta, 4 Antigens, 20 aa Linear Peptides (PEP20215042037)	20	10	ENVCEDVKDINFDTKEKFLA	Erythrocyte membrane protein 1	0
University of Alberta, 4 Antigens, 20 aa Linear Peptides (PEP20215042037)	20	11	NVCEDVKDINFDTKEKFLAG	Erythrocyte membrane protein 1	0
University of Alberta, 4 Antigens, 20 aa Linear Peptides (PEP20215042037)	20	12	VCEDVKDINFDTKEKFLAGC	Erythrocyte membrane protein 1	0
University of Alberta, 4 Antigens, 20 aa Linear Peptides (PEP20215042037)	20	13	CEDVKDINFDTKEKFLAGCL	Erythrocyte membrane protein 1	0
University of Alberta, 4 Antigens, 20 aa Linear Peptides (PEP20215042037)	20	14	EDVKDINFDTKEKFLAGCLI	Erythrocyte membrane protein 1	0
University of Alberta, 4 Antigens, 20 aa Linear Peptides (PEP20215042037)	20	15	DVKDINFDTKEKFLAGCLIV	Erythrocyte membrane protein 1	0
University of Alberta, 4 Antigens, 20 aa Linear Peptides (PEP20215042037)	20	16	VKDINFDTKEKFLAGCLIVS	Erythrocyte membrane protein 1	0
University of Alberta, 4 Antigens, 20 aa Linear Peptides (PEP20215042037)	20	17	KDINFDTKEKFLAGCLIVSF	Erythrocyte membrane protein 1	0
University of Alberta, 4 Antigens, 20 aa Linear Peptides (PEP20215042037)	20	18	DINFDTKEKFLAGCLIVSFH	Erythrocyte membrane protein 1	0
University of Alberta, 4 Antigens, 20 aa Linear Peptides (PEP20215042037)	20	19	INFDTKEKFLAGCLIVSFHE	Erythrocyte membrane protein 1	0
University of Alberta, 4 Antigens, 20 aa Linear Peptides (PEP20215042037)	20	20	NFDTKEKFLAGCLIVSFHEG	Erythrocyte membrane protein 1	0
University of Alberta, 4 Antigens, 20 aa Linear Peptides (PEP20215042037)	20	21	FDTKEKFLAGCLIVSFHEGK	Erythrocyte membrane protein 1	0
University of Alberta, 4 Antigens, 20 aa Linear Peptides (PEP20215042037)	20	22	DTKEKFLAGCLIVSFHEGKN	Erythrocyte membrane protein 1	0
University of Alberta, 4 Antigens, 20 aa Linear Peptides (PEP20215042037)	20	23	TKEKFLAGCLIVSFHEGKNL	Erythrocyte membrane protein 1	0
University of Alberta, 4 Antigens, 20 aa Linear Peptides (PEP20215042037)	20	24	KEKFLAGCLIVSFHEGKNLK	Erythrocyte membrane protein 1	0
University of Alberta, 4 Antigens, 20 aa Linear Peptides (PEP20215042037)	20	25	EKFLAGCLIVSFHEGKNLKK	Erythrocyte membrane protein 1	95.5
University of Alberta, 4 Antigens, 20 aa Linear Peptides (PEP20215042037)	20	26	KFLAGCLIVSFHEGKNLKKR	Erythrocyte membrane protein 1	290.5
University of Alberta, 4 Antigens, 20 aa Linear Peptides (PEP20215042037)	20	27	FLAGCLIVSFHEGKNLKKRY	Erythrocyte membrane protein 1	323
University of Alberta, 4 Antigens, 20 aa Linear Peptides (PEP20215042037)	20	28	LAGCLIVSFHEGKNLKKRYP	Erythrocyte membrane protein 1	149.5
University of Alberta, 4 Antigens, 20 aa Linear Peptides (PEP20215042037)	20	29	AGCLIVSFHEGKNLKKRYPQ	Erythrocyte membrane protein 1	0
University of Alberta, 4 Antigens, 20 aa Linear Peptides (PEP20215042037)	20	30	GCLIVSFHEGKNLKKRYPQN	Erythrocyte membrane protein 1	0
University of Alberta, 4 Antigens, 20 aa Linear Peptides (PEP20215042037)	20	31	CLIVSFHEGKNLKKRYPQNK	Erythrocyte membrane protein 1	608.75
University of Alberta, 4 Antigens, 20 aa Linear Peptides (PEP20215042037)	20	32	LIVSFHEGKNLKKRYPQNKN	Erythrocyte membrane protein 1	0
University of Alberta, 4 Antigens, 20 aa Linear Peptides (PEP20215042037)	20	33	IVSFHEGKNLKKRYPQNKNS	Erythrocyte membrane protein 1	148
University of Alberta, 4 Antigens, 20 aa Linear Peptides (PEP20215042037)	20	34	VSFHEGKNLKKRYPQNKNSG	Erythrocyte membrane protein 1	0
University of Alberta, 4 Antigens, 20 aa Linear Peptides (PEP20215042037)	20	35	SFHEGKNLKKRYPQNKNSGN	Erythrocyte membrane protein 1	0
University of Alberta, 4 Antigens, 20 aa Linear Peptides (PEP20215042037)	20	36	FHEGKNLKKRYPQNKNSGNK	Erythrocyte membrane protein 1	0
University of Alberta, 4 Antigens, 20 aa Linear Peptides (PEP20215042037)	20	37	HEGKNLKKRYPQNKNSGNKE	Erythrocyte membrane protein 1	0
University of Alberta, 4 Antigens, 20 aa Linear Peptides (PEP20215042037)	20	38	EGKNLKKRYPQNKNSGNKEN	Erythrocyte membrane protein 1	0
University of Alberta, 4 Antigens, 20 aa Linear Peptides (PEP20215042037)	20	39	GKNLKKRYPQNKNSGNKENL	Erythrocyte membrane protein 1	0
University of Alberta, 4 Antigens, 20 aa Linear Peptides (PEP20215042037)	20	40	KNLKKRYPQNKNSGNKENLC	Erythrocyte membrane protein 1	0
University of Alberta, 4 Antigens, 20 aa Linear Peptides (PEP20215042037)	20	41	NLKKRYPQNKNSGNKENLCK	Erythrocyte membrane protein 1	0
University of Alberta, 4 Antigens, 20 aa Linear Peptides (PEP20215042037)	20	42	LKKRYPQNKNSGNKENLCKA	Erythrocyte membrane protein 1	0
University of Alberta, 4 Antigens, 20 aa Linear Peptides (PEP20215042037)	20	43	KKRYPQNKNSGNKENLCKAL	Erythrocyte membrane protein 1	0
University of Alberta, 4 Antigens, 20 aa Linear Peptides (PEP20215042037)	20	44	KRYPQNKNSGNKENLCKALE	Erythrocyte membrane protein 1	0
University of Alberta, 4 Antigens, 20 aa Linear Peptides (PEP20215042037)	20	45	RYPQNKNSGNKENLCKALEY	Erythrocyte membrane protein 1	0
University of Alberta, 4 Antigens, 20 aa Linear Peptides (PEP20215042037)	20	46	YPQNKNSGNKENLCKALEYS	Erythrocyte membrane protein 1	0
University of Alberta, 4 Antigens, 20 aa Linear Peptides (PEP20215042037)	20	47	PQNKNSGNKENLCKALEYSF	Erythrocyte membrane protein 1	0
University of Alberta, 4 Antigens, 20 aa Linear Peptides (PEP20215042037)	20	48	QNKNSGNKENLCKALEYSFA	Erythrocyte membrane protein 1	0
University of Alberta, 4 Antigens, 20 aa Linear Peptides (PEP20215042037)	20	49	NKNSGNKENLCKALEYSFAD	Erythrocyte membrane protein 1	0
University of Alberta, 4 Antigens, 20 aa Linear Peptides (PEP20215042037)	20	50	KNSGNKENLCKALEYSFADY	Erythrocyte membrane protein 1	0
University of Alberta, 4 Antigens, 20 aa Linear Peptides (PEP20215042037)	20	51	NSGNKENLCKALEYSFADYG	Erythrocyte membrane protein 1	0
University of Alberta, 4 Antigens, 20 aa Linear Peptides (PEP20215042037)	20	52	SGNKENLCKALEYSFADYGD	Erythrocyte membrane protein 1	0
University of Alberta, 4 Antigens, 20 aa Linear Peptides (PEP20215042037)	20	53	GNKENLCKALEYSFADYGDL	Erythrocyte membrane protein 1	0
University of Alberta, 4 Antigens, 20 aa Linear Peptides (PEP20215042037)	20	54	NKENLCKALEYSFADYGDLI	Erythrocyte membrane protein 1	0
University of Alberta, 4 Antigens, 20 aa Linear Peptides (PEP20215042037)	20	55	KENLCKALEYSFADYGDLIK	Erythrocyte membrane protein 1	0
University of Alberta, 4 Antigens, 20 aa Linear Peptides (PEP20215042037)	20	56	ENLCKALEYSFADYGDLIKG	Erythrocyte membrane protein 1	0
University of Alberta, 4 Antigens, 20 aa Linear Peptides (PEP20215042037)	20	57	NLCKALEYSFADYGDLIKGT	Erythrocyte membrane protein 1	0
University of Alberta, 4 Antigens, 20 aa Linear Peptides (PEP20215042037)	20	58	LCKALEYSFADYGDLIKGTS	Erythrocyte membrane protein 1	0
University of Alberta, 4 Antigens, 20 aa Linear Peptides (PEP20215042037)	20	59	CKALEYSFADYGDLIKGTSI	Erythrocyte membrane protein 1	0
University of Alberta, 4 Antigens, 20 aa Linear Peptides (PEP20215042037)	20	60	KALEYSFADYGDLIKGTSIW	Erythrocyte membrane protein 1	0
University of Alberta, 4 Antigens, 20 aa Linear Peptides (PEP20215042037)	20	61	ALEYSFADYGDLIKGTSIWD	Erythrocyte membrane protein 1	0
University of Alberta, 4 Antigens, 20 aa Linear Peptides (PEP20215042037)	20	62	LEYSFADYGDLIKGTSIWDN	Erythrocyte membrane protein 1	0
University of Alberta, 4 Antigens, 20 aa Linear Peptides (PEP20215042037)	20	63	EYSFADYGDLIKGTSIWDNE	Erythrocyte membrane protein 1	0
University of Alberta, 4 Antigens, 20 aa Linear Peptides (PEP20215042037)	20	64	YSFADYGDLIKGTSIWDNEY	Erythrocyte membrane protein 1	4.25
University of Alberta, 4 Antigens, 20 aa Linear Peptides (PEP20215042037)	20	65	SFADYGDLIKGTSIWDNEYT	Erythrocyte membrane protein 1	0
University of Alberta, 4 Antigens, 20 aa Linear Peptides (PEP20215042037)	20	66	FADYGDLIKGTSIWDNEYTK	Erythrocyte membrane protein 1	0
University of Alberta, 4 Antigens, 20 aa Linear Peptides (PEP20215042037)	20	67	ADYGDLIKGTSIWDNEYTKD	Erythrocyte membrane protein 1	0
University of Alberta, 4 Antigens, 20 aa Linear Peptides (PEP20215042037)	22	2	DYGDLIKGTSIWDNEYTKDL	Erythrocyte membrane protein 1	0
University of Alberta, 4 Antigens, 20 aa Linear Peptides (PEP20215042037)	22	3	YGDLIKGTSIWDNEYTKDLE	Erythrocyte membrane protein 1	0
University of Alberta, 4 Antigens, 20 aa Linear Peptides (PEP20215042037)	22	4	GDLIKGTSIWDNEYTKDLEL	Erythrocyte membrane protein 1	0
University of Alberta, 4 Antigens, 20 aa Linear Peptides (PEP20215042037)	22	5	DLIKGTSIWDNEYTKDLELN	Erythrocyte membrane protein 1	0
University of Alberta, 4 Antigens, 20 aa Linear Peptides (PEP20215042037)	22	6	LIKGTSIWDNEYTKDLELNL	Erythrocyte membrane protein 1	0
University of Alberta, 4 Antigens, 20 aa Linear Peptides (PEP20215042037)	22	7	IKGTSIWDNEYTKDLELNLQ	Erythrocyte membrane protein 1	0
University of Alberta, 4 Antigens, 20 aa Linear Peptides (PEP20215042037)	22	8	KGTSIWDNEYTKDLELNLQN	Erythrocyte membrane protein 1	0
University of Alberta, 4 Antigens, 20 aa Linear Peptides (PEP20215042037)	22	9	GTSIWDNEYTKDLELNLQNN	Erythrocyte membrane protein 1	0
University of Alberta, 4 Antigens, 20 aa Linear Peptides (PEP20215042037)	22	10	TSIWDNEYTKDLELNLQNNF	Erythrocyte membrane protein 1	0
University of Alberta, 4 Antigens, 20 aa Linear Peptides (PEP20215042037)	22	11	SIWDNEYTKDLELNLQNNFG	Erythrocyte membrane protein 1	0
University of Alberta, 4 Antigens, 20 aa Linear Peptides (PEP20215042037)	22	12	IWDNEYTKDLELNLQNNFGK	Erythrocyte membrane protein 1	0
University of Alberta, 4 Antigens, 20 aa Linear Peptides (PEP20215042037)	22	13	WDNEYTKDLELNLQNNFGKL	Erythrocyte membrane protein 1	0
University of Alberta, 4 Antigens, 20 aa Linear Peptides (PEP20215042037)	22	14	DNEYTKDLELNLQNNFGKLF	Erythrocyte membrane protein 1	0
University of Alberta, 4 Antigens, 20 aa Linear Peptides (PEP20215042037)	22	15	NEYTKDLELNLQNNFGKLFG	Erythrocyte membrane protein 1	0
University of Alberta, 4 Antigens, 20 aa Linear Peptides (PEP20215042037)	22	16	EYTKDLELNLQNNFGKLFGK	Erythrocyte membrane protein 1	0
University of Alberta, 4 Antigens, 20 aa Linear Peptides (PEP20215042037)	22	17	YTKDLELNLQNNFGKLFGKY	Erythrocyte membrane protein 1	0
University of Alberta, 4 Antigens, 20 aa Linear Peptides (PEP20215042037)	22	18	TKDLELNLQNNFGKLFGKYI	Erythrocyte membrane protein 1	0
University of Alberta, 4 Antigens, 20 aa Linear Peptides (PEP20215042037)	22	19	KDLELNLQNNFGKLFGKYIK	Erythrocyte membrane protein 1	80.25
University of Alberta, 4 Antigens, 20 aa Linear Peptides (PEP20215042037)	22	20	DLELNLQNNFGKLFGKYIKK	Erythrocyte membrane protein 1	425.5
University of Alberta, 4 Antigens, 20 aa Linear Peptides (PEP20215042037)	22	21	LELNLQNNFGKLFGKYIKKN	Erythrocyte membrane protein 1	811.5
University of Alberta, 4 Antigens, 20 aa Linear Peptides (PEP20215042037)	22	22	ELNLQNNFGKLFGKYIKKNN	Erythrocyte membrane protein 1	104.25
University of Alberta, 4 Antigens, 20 aa Linear Peptides (PEP20215042037)	22	23	LNLQNNFGKLFGKYIKKNNT	Erythrocyte membrane protein 1	235.75
University of Alberta, 4 Antigens, 20 aa Linear Peptides (PEP20215042037)	22	24	NLQNNFGKLFGKYIKKNNTA	Erythrocyte membrane protein 1	97
University of Alberta, 4 Antigens, 20 aa Linear Peptides (PEP20215042037)	22	25	LQNNFGKLFGKYIKKNNTAE	Erythrocyte membrane protein 1	0
University of Alberta, 4 Antigens, 20 aa Linear Peptides (PEP20215042037)	22	26	QNNFGKLFGKYIKKNNTAEQ	Erythrocyte membrane protein 1	0
University of Alberta, 4 Antigens, 20 aa Linear Peptides (PEP20215042037)	22	27	NNFGKLFGKYIKKNNTAEQD	Erythrocyte membrane protein 1	0
University of Alberta, 4 Antigens, 20 aa Linear Peptides (PEP20215042037)	22	28	NFGKLFGKYIKKNNTAEQDT	Erythrocyte membrane protein 1	0
University of Alberta, 4 Antigens, 20 aa Linear Peptides (PEP20215042037)	22	29	FGKLFGKYIKKNNTAEQDTS	Erythrocyte membrane protein 1	0
University of Alberta, 4 Antigens, 20 aa Linear Peptides (PEP20215042037)	22	30	GKLFGKYIKKNNTAEQDTSY	Erythrocyte membrane protein 1	0
University of Alberta, 4 Antigens, 20 aa Linear Peptides (PEP20215042037)	22	31	KLFGKYIKKNNTAEQDTSYS	Erythrocyte membrane protein 1	0
University of Alberta, 4 Antigens, 20 aa Linear Peptides (PEP20215042037)	22	32	LFGKYIKKNNTAEQDTSYSS	Erythrocyte membrane protein 1	0
University of Alberta, 4 Antigens, 20 aa Linear Peptides (PEP20215042037)	22	33	FGKYIKKNNTAEQDTSYSSL	Erythrocyte membrane protein 1	0
University of Alberta, 4 Antigens, 20 aa Linear Peptides (PEP20215042037)	22	34	GKYIKKNNTAEQDTSYSSLD	Erythrocyte membrane protein 1	0
University of Alberta, 4 Antigens, 20 aa Linear Peptides (PEP20215042037)	22	35	KYIKKNNTAEQDTSYSSLDE	Erythrocyte membrane protein 1	0
University of Alberta, 4 Antigens, 20 aa Linear Peptides (PEP20215042037)	22	36	YIKKNNTAEQDTSYSSLDEL	Erythrocyte membrane protein 1	0
University of Alberta, 4 Antigens, 20 aa Linear Peptides (PEP20215042037)	22	37	IKKNNTAEQDTSYSSLDELR	Erythrocyte membrane protein 1	0
University of Alberta, 4 Antigens, 20 aa Linear Peptides (PEP20215042037)	22	38	KKNNTAEQDTSYSSLDELRE	Erythrocyte membrane protein 1	0
University of Alberta, 4 Antigens, 20 aa Linear Peptides (PEP20215042037)	22	39	KNNTAEQDTSYSSLDELRES	Erythrocyte membrane protein 1	0
University of Alberta, 4 Antigens, 20 aa Linear Peptides (PEP20215042037)	22	40	NNTAEQDTSYSSLDELRESW	Erythrocyte membrane protein 1	0
University of Alberta, 4 Antigens, 20 aa Linear Peptides (PEP20215042037)	22	41	NTAEQDTSYSSLDELRESWW	Erythrocyte membrane protein 1	0
University of Alberta, 4 Antigens, 20 aa Linear Peptides (PEP20215042037)	22	42	TAEQDTSYSSLDELRESWWN	Erythrocyte membrane protein 1	0
University of Alberta, 4 Antigens, 20 aa Linear Peptides (PEP20215042037)	22	43	AEQDTSYSSLDELRESWWNT	Erythrocyte membrane protein 1	0
University of Alberta, 4 Antigens, 20 aa Linear Peptides (PEP20215042037)	22	44	EQDTSYSSLDELRESWWNTN	Erythrocyte membrane protein 1	0
University of Alberta, 4 Antigens, 20 aa Linear Peptides (PEP20215042037)	22	45	QDTSYSSLDELRESWWNTNK	Erythrocyte membrane protein 1	0
University of Alberta, 4 Antigens, 20 aa Linear Peptides (PEP20215042037)	22	46	DTSYSSLDELRESWWNTNKK	Erythrocyte membrane protein 1	0
University of Alberta, 4 Antigens, 20 aa Linear Peptides (PEP20215042037)	22	47	TSYSSLDELRESWWNTNKKY	Erythrocyte membrane protein 1	0
University of Alberta, 4 Antigens, 20 aa Linear Peptides (PEP20215042037)	22	48	SYSSLDELRESWWNTNKKYI	Erythrocyte membrane protein 1	0
University of Alberta, 4 Antigens, 20 aa Linear Peptides (PEP20215042037)	22	49	YSSLDELRESWWNTNKKYIW	Erythrocyte membrane protein 1	0
University of Alberta, 4 Antigens, 20 aa Linear Peptides (PEP20215042037)	22	50	SSLDELRESWWNTNKKYIWT	Erythrocyte membrane protein 1	0
University of Alberta, 4 Antigens, 20 aa Linear Peptides (PEP20215042037)	22	51	SLDELRESWWNTNKKYIWTA	Erythrocyte membrane protein 1	0
University of Alberta, 4 Antigens, 20 aa Linear Peptides (PEP20215042037)	22	52	LDELRESWWNTNKKYIWTAM	Erythrocyte membrane protein 1	0
University of Alberta, 4 Antigens, 20 aa Linear Peptides (PEP20215042037)	22	53	DELRESWWNTNKKYIWTAMK	Erythrocyte membrane protein 1	90.5
University of Alberta, 4 Antigens, 20 aa Linear Peptides (PEP20215042037)	22	54	ELRESWWNTNKKYIWTAMKH	Erythrocyte membrane protein 1	88.75
University of Alberta, 4 Antigens, 20 aa Linear Peptides (PEP20215042037)	22	55	LRESWWNTNKKYIWTAMKHG	Erythrocyte membrane protein 1	0
University of Alberta, 4 Antigens, 20 aa Linear Peptides (PEP20215042037)	22	56	RESWWNTNKKYIWTAMKHGA	Erythrocyte membrane protein 1	0
University of Alberta, 4 Antigens, 20 aa Linear Peptides (PEP20215042037)	22	57	ESWWNTNKKYIWTAMKHGAE	Erythrocyte membrane protein 1	0
University of Alberta, 4 Antigens, 20 aa Linear Peptides (PEP20215042037)	22	58	SWWNTNKKYIWTAMKHGAEM	Erythrocyte membrane protein 1	0
University of Alberta, 4 Antigens, 20 aa Linear Peptides (PEP20215042037)	22	59	WWNTNKKYIWTAMKHGAEMN	Erythrocyte membrane protein 1	0
University of Alberta, 4 Antigens, 20 aa Linear Peptides (PEP20215042037)	22	60	WNTNKKYIWTAMKHGAEMNI	Erythrocyte membrane protein 1	0
University of Alberta, 4 Antigens, 20 aa Linear Peptides (PEP20215042037)	22	61	NTNKKYIWTAMKHGAEMNIT	Erythrocyte membrane protein 1	0
University of Alberta, 4 Antigens, 20 aa Linear Peptides (PEP20215042037)	22	62	TNKKYIWTAMKHGAEMNITT	Erythrocyte membrane protein 1	0
University of Alberta, 4 Antigens, 20 aa Linear Peptides (PEP20215042037)	22	63	NKKYIWTAMKHGAEMNITTC	Erythrocyte membrane protein 1	0
University of Alberta, 4 Antigens, 20 aa Linear Peptides (PEP20215042037)	22	64	KKYIWTAMKHGAEMNITTCN	Erythrocyte membrane protein 1	0
University of Alberta, 4 Antigens, 20 aa Linear Peptides (PEP20215042037)	22	65	KYIWTAMKHGAEMNITTCNA	Erythrocyte membrane protein 1	0
University of Alberta, 4 Antigens, 20 aa Linear Peptides (PEP20215042037)	22	66	YIWTAMKHGAEMNITTCNAD	Erythrocyte membrane protein 1	0
University of Alberta, 4 Antigens, 20 aa Linear Peptides (PEP20215042037)	22	67	IWTAMKHGAEMNITTCNADG	Erythrocyte membrane protein 1	0
University of Alberta, 4 Antigens, 20 aa Linear Peptides (PEP20215042037)	24	2	WTAMKHGAEMNITTCNADGS	Erythrocyte membrane protein 1	0
University of Alberta, 4 Antigens, 20 aa Linear Peptides (PEP20215042037)	24	3	TAMKHGAEMNITTCNADGSV	Erythrocyte membrane protein 1	0
University of Alberta, 4 Antigens, 20 aa Linear Peptides (PEP20215042037)	24	4	AMKHGAEMNITTCNADGSVT	Erythrocyte membrane protein 1	5
University of Alberta, 4 Antigens, 20 aa Linear Peptides (PEP20215042037)	24	5	MKHGAEMNITTCNADGSVTG	Erythrocyte membrane protein 1	0
University of Alberta, 4 Antigens, 20 aa Linear Peptides (PEP20215042037)	24	6	KHGAEMNITTCNADGSVTGS	Erythrocyte membrane protein 1	0
University of Alberta, 4 Antigens, 20 aa Linear Peptides (PEP20215042037)	24	7	HGAEMNITTCNADGSVTGSG	Erythrocyte membrane protein 1	0
University of Alberta, 4 Antigens, 20 aa Linear Peptides (PEP20215042037)	24	8	GAEMNITTCNADGSVTGSGS	Erythrocyte membrane protein 1	0
University of Alberta, 4 Antigens, 20 aa Linear Peptides (PEP20215042037)	24	9	AEMNITTCNADGSVTGSGSS	Erythrocyte membrane protein 1	0
University of Alberta, 4 Antigens, 20 aa Linear Peptides (PEP20215042037)	24	10	EMNITTCNADGSVTGSGSSC	Erythrocyte membrane protein 1	0
University of Alberta, 4 Antigens, 20 aa Linear Peptides (PEP20215042037)	24	11	MNITTCNADGSVTGSGSSCD	Erythrocyte membrane protein 1	0
University of Alberta, 4 Antigens, 20 aa Linear Peptides (PEP20215042037)	24	12	NITTCNADGSVTGSGSSCDD	Erythrocyte membrane protein 1	0
University of Alberta, 4 Antigens, 20 aa Linear Peptides (PEP20215042037)	24	13	ITTCNADGSVTGSGSSCDDI	Erythrocyte membrane protein 1	0
University of Alberta, 4 Antigens, 20 aa Linear Peptides (PEP20215042037)	24	14	TTCNADGSVTGSGSSCDDIP	Erythrocyte membrane protein 1	0
University of Alberta, 4 Antigens, 20 aa Linear Peptides (PEP20215042037)	24	15	TCNADGSVTGSGSSCDDIPT	Erythrocyte membrane protein 1	0
University of Alberta, 4 Antigens, 20 aa Linear Peptides (PEP20215042037)	24	16	CNADGSVTGSGSSCDDIPTI	Erythrocyte membrane protein 1	0
University of Alberta, 4 Antigens, 20 aa Linear Peptides (PEP20215042037)	24	17	NADGSVTGSGSSCDDIPTID	Erythrocyte membrane protein 1	0
University of Alberta, 4 Antigens, 20 aa Linear Peptides (PEP20215042037)	24	18	ADGSVTGSGSSCDDIPTIDL	Erythrocyte membrane protein 1	0
University of Alberta, 4 Antigens, 20 aa Linear Peptides (PEP20215042037)	24	19	DGSVTGSGSSCDDIPTIDLI	Erythrocyte membrane protein 1	0
University of Alberta, 4 Antigens, 20 aa Linear Peptides (PEP20215042037)	24	20	GSVTGSGSSCDDIPTIDLIP	Erythrocyte membrane protein 1	0
University of Alberta, 4 Antigens, 20 aa Linear Peptides (PEP20215042037)	24	21	SVTGSGSSCDDIPTIDLIPQ	Erythrocyte membrane protein 1	0.75
University of Alberta, 4 Antigens, 20 aa Linear Peptides (PEP20215042037)	24	22	VTGSGSSCDDIPTIDLIPQY	Erythrocyte membrane protein 1	0
University of Alberta, 4 Antigens, 20 aa Linear Peptides (PEP20215042037)	24	23	TGSGSSCDDIPTIDLIPQYL	Erythrocyte membrane protein 1	0
University of Alberta, 4 Antigens, 20 aa Linear Peptides (PEP20215042037)	24	24	GSGSSCDDIPTIDLIPQYLR	Erythrocyte membrane protein 1	0
University of Alberta, 4 Antigens, 20 aa Linear Peptides (PEP20215042037)	24	25	SGSSCDDIPTIDLIPQYLRF	Erythrocyte membrane protein 1	0
University of Alberta, 4 Antigens, 20 aa Linear Peptides (PEP20215042037)	24	26	GSSCDDIPTIDLIPQYLRFL	Erythrocyte membrane protein 1	0
University of Alberta, 4 Antigens, 20 aa Linear Peptides (PEP20215042037)	24	27	SSCDDIPTIDLIPQYLRFLQ	Erythrocyte membrane protein 1	0
University of Alberta, 4 Antigens, 20 aa Linear Peptides (PEP20215042037)	24	28	SCDDIPTIDLIPQYLRFLQE	Erythrocyte membrane protein 1	0
University of Alberta, 4 Antigens, 20 aa Linear Peptides (PEP20215042037)	24	29	CDDIPTIDLIPQYLRFLQEW	Erythrocyte membrane protein 1	0
University of Alberta, 4 Antigens, 20 aa Linear Peptides (PEP20215042037)	24	30	DDIPTIDLIPQYLRFLQEWV	Erythrocyte membrane protein 1	0
University of Alberta, 4 Antigens, 20 aa Linear Peptides (PEP20215042037)	24	31	DIPTIDLIPQYLRFLQEWVE	Erythrocyte membrane protein 1	0
University of Alberta, 4 Antigens, 20 aa Linear Peptides (PEP20215042037)	24	32	IPTIDLIPQYLRFLQEWVEN	Erythrocyte membrane protein 1	0
University of Alberta, 4 Antigens, 20 aa Linear Peptides (PEP20215042037)	24	33	PTIDLIPQYLRFLQEWVENF	Erythrocyte membrane protein 1	0
University of Alberta, 4 Antigens, 20 aa Linear Peptides (PEP20215042037)	24	34	TIDLIPQYLRFLQEWVENFC	Erythrocyte membrane protein 1	0
University of Alberta, 4 Antigens, 20 aa Linear Peptides (PEP20215042037)	24	35	IDLIPQYLRFLQEWVENFCE	Erythrocyte membrane protein 1	0
University of Alberta, 4 Antigens, 20 aa Linear Peptides (PEP20215042037)	24	36	DLIPQYLRFLQEWVENFCEQ	Erythrocyte membrane protein 1	0
University of Alberta, 4 Antigens, 20 aa Linear Peptides (PEP20215042037)	24	37	LIPQYLRFLQEWVENFCEQR	Erythrocyte membrane protein 1	0
University of Alberta, 4 Antigens, 20 aa Linear Peptides (PEP20215042037)	24	38	IPQYLRFLQEWVENFCEQRQ	Erythrocyte membrane protein 1	0
University of Alberta, 4 Antigens, 20 aa Linear Peptides (PEP20215042037)	24	39	PQYLRFLQEWVENFCEQRQA	Erythrocyte membrane protein 1	0
University of Alberta, 4 Antigens, 20 aa Linear Peptides (PEP20215042037)	24	40	QYLRFLQEWVENFCEQRQAK	Erythrocyte membrane protein 1	0
University of Alberta, 4 Antigens, 20 aa Linear Peptides (PEP20215042037)	24	41	YLRFLQEWVENFCEQRQAKV	Erythrocyte membrane protein 1	0
University of Alberta, 4 Antigens, 20 aa Linear Peptides (PEP20215042037)	24	42	LRFLQEWVENFCEQRQAKVK	Erythrocyte membrane protein 1	0
University of Alberta, 4 Antigens, 20 aa Linear Peptides (PEP20215042037)	24	43	RFLQEWVENFCEQRQAKVKD	Erythrocyte membrane protein 1	0
University of Alberta, 4 Antigens, 20 aa Linear Peptides (PEP20215042037)	24	44	FLQEWVENFCEQRQAKVKDV	Erythrocyte membrane protein 1	0
University of Alberta, 4 Antigens, 20 aa Linear Peptides (PEP20215042037)	24	45	LQEWVENFCEQRQAKVKDVI	Erythrocyte membrane protein 1	0
University of Alberta, 4 Antigens, 20 aa Linear Peptides (PEP20215042037)	24	46	QEWVENFCEQRQAKVKDVIT	Erythrocyte membrane protein 1	0
University of Alberta, 4 Antigens, 20 aa Linear Peptides (PEP20215042037)	24	47	EWVENFCEQRQAKVKDVITN	Erythrocyte membrane protein 1	0
University of Alberta, 4 Antigens, 20 aa Linear Peptides (PEP20215042037)	24	48	WVENFCEQRQAKVKDVITNC	Erythrocyte membrane protein 1	0
University of Alberta, 4 Antigens, 20 aa Linear Peptides (PEP20215042037)	24	49	VENFCEQRQAKVKDVITNCK	Erythrocyte membrane protein 1	0
University of Alberta, 4 Antigens, 20 aa Linear Peptides (PEP20215042037)	24	50	ENFCEQRQAKVKDVITNCKS	Erythrocyte membrane protein 1	0
University of Alberta, 4 Antigens, 20 aa Linear Peptides (PEP20215042037)	24	51	NFCEQRQAKVKDVITNCKSC	Erythrocyte membrane protein 1	0
University of Alberta, 4 Antigens, 20 aa Linear Peptides (PEP20215042037)	24	52	FCEQRQAKVKDVITNCKSCK	Erythrocyte membrane protein 1	0
University of Alberta, 4 Antigens, 20 aa Linear Peptides (PEP20215042037)	24	53	CEQRQAKVKDVITNCKSCKE	Erythrocyte membrane protein 1	0
University of Alberta, 4 Antigens, 20 aa Linear Peptides (PEP20215042037)	24	54	EQRQAKVKDVITNCKSCKES	Erythrocyte membrane protein 1	0
University of Alberta, 4 Antigens, 20 aa Linear Peptides (PEP20215042037)	24	55	QRQAKVKDVITNCKSCKESG	Erythrocyte membrane protein 1	0
University of Alberta, 4 Antigens, 20 aa Linear Peptides (PEP20215042037)	24	56	RQAKVKDVITNCKSCKESGN	Erythrocyte membrane protein 1	0
University of Alberta, 4 Antigens, 20 aa Linear Peptides (PEP20215042037)	24	57	QAKVKDVITNCKSCKESGNK	Erythrocyte membrane protein 1	0
University of Alberta, 4 Antigens, 20 aa Linear Peptides (PEP20215042037)	24	58	AKVKDVITNCKSCKESGNKC	Erythrocyte membrane protein 1	0
University of Alberta, 4 Antigens, 20 aa Linear Peptides (PEP20215042037)	24	59	KVKDVITNCKSCKESGNKCK	Erythrocyte membrane protein 1	0
University of Alberta, 4 Antigens, 20 aa Linear Peptides (PEP20215042037)	24	60	VKDVITNCKSCKESGNKCKT	Erythrocyte membrane protein 1	0
University of Alberta, 4 Antigens, 20 aa Linear Peptides (PEP20215042037)	24	61	KDVITNCKSCKESGNKCKTE	Erythrocyte membrane protein 1	0
University of Alberta, 4 Antigens, 20 aa Linear Peptides (PEP20215042037)	24	62	DVITNCKSCKESGNKCKTEC	Erythrocyte membrane protein 1	0
University of Alberta, 4 Antigens, 20 aa Linear Peptides (PEP20215042037)	24	63	VITNCKSCKESGNKCKTECK	Erythrocyte membrane protein 1	2
University of Alberta, 4 Antigens, 20 aa Linear Peptides (PEP20215042037)	24	64	ITNCKSCKESGNKCKTECKT	Erythrocyte membrane protein 1	0
University of Alberta, 4 Antigens, 20 aa Linear Peptides (PEP20215042037)	24	65	TNCKSCKESGNKCKTECKTK	Erythrocyte membrane protein 1	0
University of Alberta, 4 Antigens, 20 aa Linear Peptides (PEP20215042037)	24	66	NCKSCKESGNKCKTECKTKC	Erythrocyte membrane protein 1	0
University of Alberta, 4 Antigens, 20 aa Linear Peptides (PEP20215042037)	24	67	CKSCKESGNKCKTECKTKCK	Erythrocyte membrane protein 1	0
University of Alberta, 4 Antigens, 20 aa Linear Peptides (PEP20215042037)	26	2	KSCKESGNKCKTECKTKCKD	Erythrocyte membrane protein 1	0
University of Alberta, 4 Antigens, 20 aa Linear Peptides (PEP20215042037)	26	3	SCKESGNKCKTECKTKCKDE	Erythrocyte membrane protein 1	0
University of Alberta, 4 Antigens, 20 aa Linear Peptides (PEP20215042037)	26	4	CKESGNKCKTECKTKCKDEC	Erythrocyte membrane protein 1	0
University of Alberta, 4 Antigens, 20 aa Linear Peptides (PEP20215042037)	26	5	KESGNKCKTECKTKCKDECE	Erythrocyte membrane protein 1	0
University of Alberta, 4 Antigens, 20 aa Linear Peptides (PEP20215042037)	26	6	ESGNKCKTECKTKCKDECEK	Erythrocyte membrane protein 1	0
University of Alberta, 4 Antigens, 20 aa Linear Peptides (PEP20215042037)	26	7	SGNKCKTECKTKCKDECEKY	Erythrocyte membrane protein 1	0
University of Alberta, 4 Antigens, 20 aa Linear Peptides (PEP20215042037)	26	8	GNKCKTECKTKCKDECEKYK	Erythrocyte membrane protein 1	93
University of Alberta, 4 Antigens, 20 aa Linear Peptides (PEP20215042037)	26	9	NKCKTECKTKCKDECEKYKK	Erythrocyte membrane protein 1	901
University of Alberta, 4 Antigens, 20 aa Linear Peptides (PEP20215042037)	26	10	KCKTECKTKCKDECEKYKKF	Erythrocyte membrane protein 1	230.5
University of Alberta, 4 Antigens, 20 aa Linear Peptides (PEP20215042037)	26	11	CKTECKTKCKDECEKYKKFI	Erythrocyte membrane protein 1	92
University of Alberta, 4 Antigens, 20 aa Linear Peptides (PEP20215042037)	26	12	KTECKTKCKDECEKYKKFIE	Erythrocyte membrane protein 1	0
University of Alberta, 4 Antigens, 20 aa Linear Peptides (PEP20215042037)	26	13	TECKTKCKDECEKYKKFIEA	Erythrocyte membrane protein 1	0
University of Alberta, 4 Antigens, 20 aa Linear Peptides (PEP20215042037)	26	14	ECKTKCKDECEKYKKFIEAC	Erythrocyte membrane protein 1	0
University of Alberta, 4 Antigens, 20 aa Linear Peptides (PEP20215042037)	26	15	CKTKCKDECEKYKKFIEACG	Erythrocyte membrane protein 1	0
University of Alberta, 4 Antigens, 20 aa Linear Peptides (PEP20215042037)	26	16	KTKCKDECEKYKKFIEACGT	Erythrocyte membrane protein 1	0
University of Alberta, 4 Antigens, 20 aa Linear Peptides (PEP20215042037)	26	17	TKCKDECEKYKKFIEACGTA	Erythrocyte membrane protein 1	0
University of Alberta, 4 Antigens, 20 aa Linear Peptides (PEP20215042037)	26	18	KCKDECEKYKKFIEACGTAG	Erythrocyte membrane protein 1	0
University of Alberta, 4 Antigens, 20 aa Linear Peptides (PEP20215042037)	26	19	CKDECEKYKKFIEACGTAGG	Erythrocyte membrane protein 1	0
University of Alberta, 4 Antigens, 20 aa Linear Peptides (PEP20215042037)	26	20	KDECEKYKKFIEACGTAGGG	Erythrocyte membrane protein 1	0
University of Alberta, 4 Antigens, 20 aa Linear Peptides (PEP20215042037)	26	21	DECEKYKKFIEACGTAGGGI	Erythrocyte membrane protein 1	0
University of Alberta, 4 Antigens, 20 aa Linear Peptides (PEP20215042037)	26	22	ECEKYKKFIEACGTAGGGIG	Erythrocyte membrane protein 1	0
University of Alberta, 4 Antigens, 20 aa Linear Peptides (PEP20215042037)	26	23	CEKYKKFIEACGTAGGGIGT	Erythrocyte membrane protein 1	0
University of Alberta, 4 Antigens, 20 aa Linear Peptides (PEP20215042037)	26	24	EKYKKFIEACGTAGGGIGTA	Erythrocyte membrane protein 1	0
University of Alberta, 4 Antigens, 20 aa Linear Peptides (PEP20215042037)	26	25	KYKKFIEACGTAGGGIGTAG	Erythrocyte membrane protein 1	0
University of Alberta, 4 Antigens, 20 aa Linear Peptides (PEP20215042037)	26	26	YKKFIEACGTAGGGIGTAGS	Erythrocyte membrane protein 1	0
University of Alberta, 4 Antigens, 20 aa Linear Peptides (PEP20215042037)	26	27	KKFIEACGTAGGGIGTAGSP	Erythrocyte membrane protein 1	0
University of Alberta, 4 Antigens, 20 aa Linear Peptides (PEP20215042037)	26	28	KFIEACGTAGGGIGTAGSPW	Erythrocyte membrane protein 1	0
University of Alberta, 4 Antigens, 20 aa Linear Peptides (PEP20215042037)	26	29	FIEACGTAGGGIGTAGSPWS	Erythrocyte membrane protein 1	0
University of Alberta, 4 Antigens, 20 aa Linear Peptides (PEP20215042037)	26	30	IEACGTAGGGIGTAGSPWSK	Erythrocyte membrane protein 1	0
University of Alberta, 4 Antigens, 20 aa Linear Peptides (PEP20215042037)	26	31	EACGTAGGGIGTAGSPWSKR	Erythrocyte membrane protein 1	5.25
University of Alberta, 4 Antigens, 20 aa Linear Peptides (PEP20215042037)	26	32	ACGTAGGGIGTAGSPWSKRW	Erythrocyte membrane protein 1	0
University of Alberta, 4 Antigens, 20 aa Linear Peptides (PEP20215042037)	26	33	CGTAGGGIGTAGSPWSKRWD	Erythrocyte membrane protein 1	0
University of Alberta, 4 Antigens, 20 aa Linear Peptides (PEP20215042037)	26	34	GTAGGGIGTAGSPWSKRWDQ	Erythrocyte membrane protein 1	5.5
University of Alberta, 4 Antigens, 20 aa Linear Peptides (PEP20215042037)	26	35	TAGGGIGTAGSPWSKRWDQI	Erythrocyte membrane protein 1	0
University of Alberta, 4 Antigens, 20 aa Linear Peptides (PEP20215042037)	26	36	AGGGIGTAGSPWSKRWDQIY	Erythrocyte membrane protein 1	0
University of Alberta, 4 Antigens, 20 aa Linear Peptides (PEP20215042037)	26	37	GGGIGTAGSPWSKRWDQIYK	Erythrocyte membrane protein 1	0
University of Alberta, 4 Antigens, 20 aa Linear Peptides (PEP20215042037)	26	38	GGIGTAGSPWSKRWDQIYKR	Erythrocyte membrane protein 1	336.5
University of Alberta, 4 Antigens, 20 aa Linear Peptides (PEP20215042037)	26	39	GIGTAGSPWSKRWDQIYKRY	Erythrocyte membrane protein 1	0
University of Alberta, 4 Antigens, 20 aa Linear Peptides (PEP20215042037)	26	40	IGTAGSPWSKRWDQIYKRYS	Erythrocyte membrane protein 1	0
University of Alberta, 4 Antigens, 20 aa Linear Peptides (PEP20215042037)	26	41	GTAGSPWSKRWDQIYKRYSK	Erythrocyte membrane protein 1	813
University of Alberta, 4 Antigens, 20 aa Linear Peptides (PEP20215042037)	26	42	TAGSPWSKRWDQIYKRYSKH	Erythrocyte membrane protein 1	721.75
University of Alberta, 4 Antigens, 20 aa Linear Peptides (PEP20215042037)	26	43	AGSPWSKRWDQIYKRYSKHI	Erythrocyte membrane protein 1	109.75
University of Alberta, 4 Antigens, 20 aa Linear Peptides (PEP20215042037)	26	44	GSPWSKRWDQIYKRYSKHIE	Erythrocyte membrane protein 1	0
University of Alberta, 4 Antigens, 20 aa Linear Peptides (PEP20215042037)	26	45	SPWSKRWDQIYKRYSKHIED	Erythrocyte membrane protein 1	0
University of Alberta, 4 Antigens, 20 aa Linear Peptides (PEP20215042037)	26	46	PWSKRWDQIYKRYSKHIEDA	Erythrocyte membrane protein 1	0
University of Alberta, 4 Antigens, 20 aa Linear Peptides (PEP20215042037)	26	47	WSKRWDQIYKRYSKHIEDAK	Erythrocyte membrane protein 1	0
University of Alberta, 4 Antigens, 20 aa Linear Peptides (PEP20215042037)	26	48	SKRWDQIYKRYSKHIEDAKR	Erythrocyte membrane protein 1	96.75
University of Alberta, 4 Antigens, 20 aa Linear Peptides (PEP20215042037)	26	49	KRWDQIYKRYSKHIEDAKRN	Erythrocyte membrane protein 1	93
University of Alberta, 4 Antigens, 20 aa Linear Peptides (PEP20215042037)	26	50	RWDQIYKRYSKHIEDAKRNR	Erythrocyte membrane protein 1	0
University of Alberta, 4 Antigens, 20 aa Linear Peptides (PEP20215042037)	26	51	WDQIYKRYSKHIEDAKRNRK	Erythrocyte membrane protein 1	221
University of Alberta, 4 Antigens, 20 aa Linear Peptides (PEP20215042037)	26	52	DQIYKRYSKHIEDAKRNRKA	Erythrocyte membrane protein 1	97.5
University of Alberta, 4 Antigens, 20 aa Linear Peptides (PEP20215042037)	26	53	QIYKRYSKHIEDAKRNRKAG	Erythrocyte membrane protein 1	0
University of Alberta, 4 Antigens, 20 aa Linear Peptides (PEP20215042037)	26	54	IYKRYSKHIEDAKRNRKAGT	Erythrocyte membrane protein 1	0
University of Alberta, 4 Antigens, 20 aa Linear Peptides (PEP20215042037)	26	55	YKRYSKHIEDAKRNRKAGTK	Erythrocyte membrane protein 1	164.5
University of Alberta, 4 Antigens, 20 aa Linear Peptides (PEP20215042037)	26	56	KRYSKHIEDAKRNRKAGTKN	Erythrocyte membrane protein 1	0
University of Alberta, 4 Antigens, 20 aa Linear Peptides (PEP20215042037)	26	57	RYSKHIEDAKRNRKAGTKNC	Erythrocyte membrane protein 1	0
University of Alberta, 4 Antigens, 20 aa Linear Peptides (PEP20215042037)	26	58	YSKHIEDAKRNRKAGTKNCG	Erythrocyte membrane protein 1	0
University of Alberta, 4 Antigens, 20 aa Linear Peptides (PEP20215042037)	26	59	SKHIEDAKRNRKAGTKNCGT	Erythrocyte membrane protein 1	2.5
University of Alberta, 4 Antigens, 20 aa Linear Peptides (PEP20215042037)	26	60	KHIEDAKRNRKAGTKNCGTS	Erythrocyte membrane protein 1	0
University of Alberta, 4 Antigens, 20 aa Linear Peptides (PEP20215042037)	26	61	HIEDAKRNRKAGTKNCGTSS	Erythrocyte membrane protein 1	0
University of Alberta, 4 Antigens, 20 aa Linear Peptides (PEP20215042037)	26	62	IEDAKRNRKAGTKNCGTSST	Erythrocyte membrane protein 1	0
University of Alberta, 4 Antigens, 20 aa Linear Peptides (PEP20215042037)	26	63	EDAKRNRKAGTKNCGTSSTT	Erythrocyte membrane protein 1	0
University of Alberta, 4 Antigens, 20 aa Linear Peptides (PEP20215042037)	26	64	DAKRNRKAGTKNCGTSSTTN	Erythrocyte membrane protein 1	0
University of Alberta, 4 Antigens, 20 aa Linear Peptides (PEP20215042037)	26	65	AKRNRKAGTKNCGTSSTTNA	Erythrocyte membrane protein 1	0
University of Alberta, 4 Antigens, 20 aa Linear Peptides (PEP20215042037)	26	66	KRNRKAGTKNCGTSSTTNAA	Erythrocyte membrane protein 1	0
University of Alberta, 4 Antigens, 20 aa Linear Peptides (PEP20215042037)	26	67	RNRKAGTKNCGTSSTTNAAA	Erythrocyte membrane protein 1	0
University of Alberta, 4 Antigens, 20 aa Linear Peptides (PEP20215042037)	28	2	NRKAGTKNCGTSSTTNAAAS	Erythrocyte membrane protein 1	0
University of Alberta, 4 Antigens, 20 aa Linear Peptides (PEP20215042037)	28	3	RKAGTKNCGTSSTTNAAAST	Erythrocyte membrane protein 1	0
University of Alberta, 4 Antigens, 20 aa Linear Peptides (PEP20215042037)	28	4	KAGTKNCGTSSTTNAAASTD	Erythrocyte membrane protein 1	0
University of Alberta, 4 Antigens, 20 aa Linear Peptides (PEP20215042037)	28	5	AGTKNCGTSSTTNAAASTDE	Erythrocyte membrane protein 1	0
University of Alberta, 4 Antigens, 20 aa Linear Peptides (PEP20215042037)	28	6	GTKNCGTSSTTNAAASTDEN	Erythrocyte membrane protein 1	0
University of Alberta, 4 Antigens, 20 aa Linear Peptides (PEP20215042037)	28	7	TKNCGTSSTTNAAASTDENK	Erythrocyte membrane protein 1	0
University of Alberta, 4 Antigens, 20 aa Linear Peptides (PEP20215042037)	28	8	KNCGTSSTTNAAASTDENKC	Erythrocyte membrane protein 1	0
University of Alberta, 4 Antigens, 20 aa Linear Peptides (PEP20215042037)	28	9	NCGTSSTTNAAASTDENKCV	Erythrocyte membrane protein 1	0
University of Alberta, 4 Antigens, 20 aa Linear Peptides (PEP20215042037)	28	10	CGTSSTTNAAASTDENKCVQ	Erythrocyte membrane protein 1	0
University of Alberta, 4 Antigens, 20 aa Linear Peptides (PEP20215042037)	28	11	GTSSTTNAAASTDENKCVQS	Erythrocyte membrane protein 1	0
University of Alberta, 4 Antigens, 20 aa Linear Peptides (PEP20215042037)	28	12	TSSTTNAAASTDENKCVQSD	Erythrocyte membrane protein 1	0
University of Alberta, 4 Antigens, 20 aa Linear Peptides (PEP20215042037)	28	13	SSTTNAAASTDENKCVQSDI	Erythrocyte membrane protein 1	0
University of Alberta, 4 Antigens, 20 aa Linear Peptides (PEP20215042037)	28	14	STTNAAASTDENKCVQSDID	Erythrocyte membrane protein 1	0
University of Alberta, 4 Antigens, 20 aa Linear Peptides (PEP20215042037)	28	15	TTNAAASTDENKCVQSDIDS	Erythrocyte membrane protein 1	0
University of Alberta, 4 Antigens, 20 aa Linear Peptides (PEP20215042037)	28	16	TNAAASTDENKCVQSDIDSF	Erythrocyte membrane protein 1	0
University of Alberta, 4 Antigens, 20 aa Linear Peptides (PEP20215042037)	28	17	NAAASTDENKCVQSDIDSFF	Erythrocyte membrane protein 1	0
University of Alberta, 4 Antigens, 20 aa Linear Peptides (PEP20215042037)	28	18	AAASTDENKCVQSDIDSFFK	Erythrocyte membrane protein 1	0
University of Alberta, 4 Antigens, 20 aa Linear Peptides (PEP20215042037)	28	19	AASTDENKCVQSDIDSFFKH	Erythrocyte membrane protein 1	0
University of Alberta, 4 Antigens, 20 aa Linear Peptides (PEP20215042037)	28	20	ASTDENKCVQSDIDSFFKHL	Erythrocyte membrane protein 1	0
University of Alberta, 4 Antigens, 20 aa Linear Peptides (PEP20215042037)	28	21	STDENKCVQSDIDSFFKHLI	Erythrocyte membrane protein 1	0
University of Alberta, 4 Antigens, 20 aa Linear Peptides (PEP20215042037)	28	22	TDENKCVQSDIDSFFKHLID	Erythrocyte membrane protein 1	0
University of Alberta, 4 Antigens, 20 aa Linear Peptides (PEP20215042037)	28	23	DENKCVQSDIDSFFKHLIDI	Erythrocyte membrane protein 1	0
University of Alberta, 4 Antigens, 20 aa Linear Peptides (PEP20215042037)	28	24	ENKCVQSDIDSFFKHLIDIG	Erythrocyte membrane protein 1	0
University of Alberta, 4 Antigens, 20 aa Linear Peptides (PEP20215042037)	28	25	NKCVQSDIDSFFKHLIDIGL	Erythrocyte membrane protein 1	0
University of Alberta, 4 Antigens, 20 aa Linear Peptides (PEP20215042037)	28	26	KCVQSDIDSFFKHLIDIGLT	Erythrocyte membrane protein 1	0
University of Alberta, 4 Antigens, 20 aa Linear Peptides (PEP20215042037)	28	27	CVQSDIDSFFKHLIDIGLTT	Erythrocyte membrane protein 1	0
University of Alberta, 4 Antigens, 20 aa Linear Peptides (PEP20215042037)	28	28	VQSDIDSFFKHLIDIGLTTP	Erythrocyte membrane protein 1	0
University of Alberta, 4 Antigens, 20 aa Linear Peptides (PEP20215042037)	28	29	QSDIDSFFKHLIDIGLTTPS	Erythrocyte membrane protein 1	0
University of Alberta, 4 Antigens, 20 aa Linear Peptides (PEP20215042037)	28	30	SDIDSFFKHLIDIGLTTPSS	Erythrocyte membrane protein 1	0
University of Alberta, 4 Antigens, 20 aa Linear Peptides (PEP20215042037)	28	31	DIDSFFKHLIDIGLTTPSSY	Erythrocyte membrane protein 1	0
University of Alberta, 4 Antigens, 20 aa Linear Peptides (PEP20215042037)	28	32	IDSFFKHLIDIGLTTPSSYL	Erythrocyte membrane protein 1	0
University of Alberta, 4 Antigens, 20 aa Linear Peptides (PEP20215042037)	28	33	DSFFKHLIDIGLTTPSSYLS	Erythrocyte membrane protein 1	0
University of Alberta, 4 Antigens, 20 aa Linear Peptides (PEP20215042037)	28	34	SFFKHLIDIGLTTPSSYLSN	Erythrocyte membrane protein 1	0
University of Alberta, 4 Antigens, 20 aa Linear Peptides (PEP20215042037)	28	35	FFKHLIDIGLTTPSSYLSNV	Erythrocyte membrane protein 1	0
University of Alberta, 4 Antigens, 20 aa Linear Peptides (PEP20215042037)	28	36	FKHLIDIGLTTPSSYLSNVL	Erythrocyte membrane protein 1	0
University of Alberta, 4 Antigens, 20 aa Linear Peptides (PEP20215042037)	28	37	KHLIDIGLTTPSSYLSNVLD	Erythrocyte membrane protein 1	2
University of Alberta, 4 Antigens, 20 aa Linear Peptides (PEP20215042037)	28	38	HLIDIGLTTPSSYLSNVLDD	Erythrocyte membrane protein 1	0
University of Alberta, 4 Antigens, 20 aa Linear Peptides (PEP20215042037)	28	39	LIDIGLTTPSSYLSNVLDDN	Erythrocyte membrane protein 1	0
University of Alberta, 4 Antigens, 20 aa Linear Peptides (PEP20215042037)	28	40	IDIGLTTPSSYLSNVLDDNI	Erythrocyte membrane protein 1	0
University of Alberta, 4 Antigens, 20 aa Linear Peptides (PEP20215042037)	28	41	DIGLTTPSSYLSNVLDDNIC	Erythrocyte membrane protein 1	0
University of Alberta, 4 Antigens, 20 aa Linear Peptides (PEP20215042037)	28	42	IGLTTPSSYLSNVLDDNICG	Erythrocyte membrane protein 1	0
University of Alberta, 4 Antigens, 20 aa Linear Peptides (PEP20215042037)	28	43	GLTTPSSYLSNVLDDNICGA	Erythrocyte membrane protein 1	0
University of Alberta, 4 Antigens, 20 aa Linear Peptides (PEP20215042037)	28	44	LTTPSSYLSNVLDDNICGAD	Erythrocyte membrane protein 1	0
University of Alberta, 4 Antigens, 20 aa Linear Peptides (PEP20215042037)	28	45	TTPSSYLSNVLDDNICGADK	Erythrocyte membrane protein 1	0
University of Alberta, 4 Antigens, 20 aa Linear Peptides (PEP20215042037)	28	46	TPSSYLSNVLDDNICGADKA	Erythrocyte membrane protein 1	0
University of Alberta, 4 Antigens, 20 aa Linear Peptides (PEP20215042037)	28	47	PSSYLSNVLDDNICGADKAP	Erythrocyte membrane protein 1	0
University of Alberta, 4 Antigens, 20 aa Linear Peptides (PEP20215042037)	28	48	SSYLSNVLDDNICGADKAPW	Erythrocyte membrane protein 1	0
University of Alberta, 4 Antigens, 20 aa Linear Peptides (PEP20215042037)	28	49	SYLSNVLDDNICGADKAPWT	Erythrocyte membrane protein 1	3.5
University of Alberta, 4 Antigens, 20 aa Linear Peptides (PEP20215042037)	28	50	YLSNVLDDNICGADKAPWTT	Erythrocyte membrane protein 1	0
University of Alberta, 4 Antigens, 20 aa Linear Peptides (PEP20215042037)	28	51	LSNVLDDNICGADKAPWTTY	Erythrocyte membrane protein 1	0
University of Alberta, 4 Antigens, 20 aa Linear Peptides (PEP20215042037)	28	52	SNVLDDNICGADKAPWTTYT	Erythrocyte membrane protein 1	0
University of Alberta, 4 Antigens, 20 aa Linear Peptides (PEP20215042037)	28	53	NVLDDNICGADKAPWTTYTT	Erythrocyte membrane protein 1	0
University of Alberta, 4 Antigens, 20 aa Linear Peptides (PEP20215042037)	28	54	VLDDNICGADKAPWTTYTTY	Erythrocyte membrane protein 1	0
University of Alberta, 4 Antigens, 20 aa Linear Peptides (PEP20215042037)	28	55	LDDNICGADKAPWTTYTTYT	Erythrocyte membrane protein 1	0
University of Alberta, 4 Antigens, 20 aa Linear Peptides (PEP20215042037)	28	56	DDNICGADKAPWTTYTTYTT	Erythrocyte membrane protein 1	0
University of Alberta, 4 Antigens, 20 aa Linear Peptides (PEP20215042037)	28	57	DNICGADKAPWTTYTTYTTT	Erythrocyte membrane protein 1	0
University of Alberta, 4 Antigens, 20 aa Linear Peptides (PEP20215042037)	28	58	NICGADKAPWTTYTTYTTTE	Erythrocyte membrane protein 1	0
University of Alberta, 4 Antigens, 20 aa Linear Peptides (PEP20215042037)	28	59	ICGADKAPWTTYTTYTTTEK	Erythrocyte membrane protein 1	0
University of Alberta, 4 Antigens, 20 aa Linear Peptides (PEP20215042037)	28	60	CGADKAPWTTYTTYTTTEKC	Erythrocyte membrane protein 1	0
University of Alberta, 4 Antigens, 20 aa Linear Peptides (PEP20215042037)	28	61	GADKAPWTTYTTYTTTEKCN	Erythrocyte membrane protein 1	0
University of Alberta, 4 Antigens, 20 aa Linear Peptides (PEP20215042037)	28	62	ADKAPWTTYTTYTTTEKCNK	Erythrocyte membrane protein 1	0
University of Alberta, 4 Antigens, 20 aa Linear Peptides (PEP20215042037)	28	63	DKAPWTTYTTYTTTEKCNKE	Erythrocyte membrane protein 1	0
University of Alberta, 4 Antigens, 20 aa Linear Peptides (PEP20215042037)	28	64	KAPWTTYTTYTTTEKCNKER	Erythrocyte membrane protein 1	0
University of Alberta, 4 Antigens, 20 aa Linear Peptides (PEP20215042037)	28	65	APWTTYTTYTTTEKCNKERD	Erythrocyte membrane protein 1	0
University of Alberta, 4 Antigens, 20 aa Linear Peptides (PEP20215042037)	28	66	PWTTYTTYTTTEKCNKERDK	Erythrocyte membrane protein 1	0
University of Alberta, 4 Antigens, 20 aa Linear Peptides (PEP20215042037)	28	67	WTTYTTYTTTEKCNKERDKS	Erythrocyte membrane protein 1	0
University of Alberta, 4 Antigens, 20 aa Linear Peptides (PEP20215042037)	30	2	TTYTTYTTTEKCNKERDKSK	Erythrocyte membrane protein 1	0
University of Alberta, 4 Antigens, 20 aa Linear Peptides (PEP20215042037)	30	3	TYTTYTTTEKCNKERDKSKS	Erythrocyte membrane protein 1	0
University of Alberta, 4 Antigens, 20 aa Linear Peptides (PEP20215042037)	30	4	YTTYTTTEKCNKERDKSKSQ	Erythrocyte membrane protein 1	0
University of Alberta, 4 Antigens, 20 aa Linear Peptides (PEP20215042037)	30	5	TTYTTTEKCNKERDKSKSQS	Erythrocyte membrane protein 1	0
University of Alberta, 4 Antigens, 20 aa Linear Peptides (PEP20215042037)	30	6	TYTTTEKCNKERDKSKSQSS	Erythrocyte membrane protein 1	0
University of Alberta, 4 Antigens, 20 aa Linear Peptides (PEP20215042037)	30	7	YTTTEKCNKERDKSKSQSSD	Erythrocyte membrane protein 1	0
University of Alberta, 4 Antigens, 20 aa Linear Peptides (PEP20215042037)	30	8	TTTEKCNKERDKSKSQSSDT	Erythrocyte membrane protein 1	0
University of Alberta, 4 Antigens, 20 aa Linear Peptides (PEP20215042037)	30	9	TTEKCNKERDKSKSQSSDTL	Erythrocyte membrane protein 1	0
University of Alberta, 4 Antigens, 20 aa Linear Peptides (PEP20215042037)	30	10	TEKCNKERDKSKSQSSDTLV	Erythrocyte membrane protein 1	0
University of Alberta, 4 Antigens, 20 aa Linear Peptides (PEP20215042037)	30	11	EKCNKERDKSKSQSSDTLVV	Erythrocyte membrane protein 1	0
University of Alberta, 4 Antigens, 20 aa Linear Peptides (PEP20215042037)	30	12	KCNKERDKSKSQSSDTLVVV	Erythrocyte membrane protein 1	0
University of Alberta, 4 Antigens, 20 aa Linear Peptides (PEP20215042037)	30	13	CNKERDKSKSQSSDTLVVVN	Erythrocyte membrane protein 1	0
University of Alberta, 4 Antigens, 20 aa Linear Peptides (PEP20215042037)	30	14	NKERDKSKSQSSDTLVVVNV	Erythrocyte membrane protein 1	0
University of Alberta, 4 Antigens, 20 aa Linear Peptides (PEP20215042037)	30	15	KERDKSKSQSSDTLVVVNVP	Erythrocyte membrane protein 1	0
University of Alberta, 4 Antigens, 20 aa Linear Peptides (PEP20215042037)	30	16	ERDKSKSQSSDTLVVVNVPS	Erythrocyte membrane protein 1	0
University of Alberta, 4 Antigens, 20 aa Linear Peptides (PEP20215042037)	30	17	RDKSKSQSSDTLVVVNVPSP	Erythrocyte membrane protein 1	0
University of Alberta, 4 Antigens, 20 aa Linear Peptides (PEP20215042037)	30	18	DKSKSQSSDTLVVVNVPSPL	Erythrocyte membrane protein 1	0
University of Alberta, 4 Antigens, 20 aa Linear Peptides (PEP20215042037)	30	19	KSKSQSSDTLVVVNVPSPLG	Erythrocyte membrane protein 1	0
University of Alberta, 4 Antigens, 20 aa Linear Peptides (PEP20215042037)	30	20	SKSQSSDTLVVVNVPSPLGN	Erythrocyte membrane protein 1	0
University of Alberta, 4 Antigens, 20 aa Linear Peptides (PEP20215042037)	30	21	KSQSSDTLVVVNVPSPLGNT	Erythrocyte membrane protein 1	0
University of Alberta, 4 Antigens, 20 aa Linear Peptides (PEP20215042037)	30	22	SQSSDTLVVVNVPSPLGNTP	Erythrocyte membrane protein 1	0
University of Alberta, 4 Antigens, 20 aa Linear Peptides (PEP20215042037)	30	23	QSSDTLVVVNVPSPLGNTPY	Erythrocyte membrane protein 1	0
University of Alberta, 4 Antigens, 20 aa Linear Peptides (PEP20215042037)	30	24	SSDTLVVVNVPSPLGNTPYR	Erythrocyte membrane protein 1	0
University of Alberta, 4 Antigens, 20 aa Linear Peptides (PEP20215042037)	30	25	SDTLVVVNVPSPLGNTPYRY	Erythrocyte membrane protein 1	0
University of Alberta, 4 Antigens, 20 aa Linear Peptides (PEP20215042037)	30	26	DTLVVVNVPSPLGNTPYRYK	Erythrocyte membrane protein 1	0
University of Alberta, 4 Antigens, 20 aa Linear Peptides (PEP20215042037)	30	27	TLVVVNVPSPLGNTPYRYKY	Erythrocyte membrane protein 1	0
University of Alberta, 4 Antigens, 20 aa Linear Peptides (PEP20215042037)	30	28	LVVVNVPSPLGNTPYRYKYA	Erythrocyte membrane protein 1	0
University of Alberta, 4 Antigens, 20 aa Linear Peptides (PEP20215042037)	30	29	VVVNVPSPLGNTPYRYKYAC	Erythrocyte membrane protein 1	0
University of Alberta, 4 Antigens, 20 aa Linear Peptides (PEP20215042037)	30	30	VVNVPSPLGNTPYRYKYACQ	Erythrocyte membrane protein 1	0
University of Alberta, 4 Antigens, 20 aa Linear Peptides (PEP20215042037)	30	31	VNVPSPLGNTPYRYKYACQC	Erythrocyte membrane protein 1	0
University of Alberta, 4 Antigens, 20 aa Linear Peptides (PEP20215042037)	30	32	NVPSPLGNTPYRYKYACQCK	Erythrocyte membrane protein 1	0
University of Alberta, 4 Antigens, 20 aa Linear Peptides (PEP20215042037)	30	33	VPSPLGNTPYRYKYACQCKI	Erythrocyte membrane protein 1	0
University of Alberta, 4 Antigens, 20 aa Linear Peptides (PEP20215042037)	30	34	PSPLGNTPYRYKYACQCKIP	Erythrocyte membrane protein 1	0
University of Alberta, 4 Antigens, 20 aa Linear Peptides (PEP20215042037)	30	35	SPLGNTPYRYKYACQCKIPT	Erythrocyte membrane protein 1	0
University of Alberta, 4 Antigens, 20 aa Linear Peptides (PEP20215042037)	30	36	PLGNTPYRYKYACQCKIPTN	Erythrocyte membrane protein 1	0
University of Alberta, 4 Antigens, 20 aa Linear Peptides (PEP20215042037)	30	37	LGNTPYRYKYACQCKIPTNE	Erythrocyte membrane protein 1	2.5
University of Alberta, 4 Antigens, 20 aa Linear Peptides (PEP20215042037)	30	38	GNTPYRYKYACQCKIPTNEE	Erythrocyte membrane protein 1	0
University of Alberta, 4 Antigens, 20 aa Linear Peptides (PEP20215042037)	30	39	NTPYRYKYACQCKIPTNEET	Erythrocyte membrane protein 1	0
University of Alberta, 4 Antigens, 20 aa Linear Peptides (PEP20215042037)	30	40	TPYRYKYACQCKIPTNEETC	Erythrocyte membrane protein 1	0
University of Alberta, 4 Antigens, 20 aa Linear Peptides (PEP20215042037)	30	41	PYRYKYACQCKIPTNEETCD	Erythrocyte membrane protein 1	0
University of Alberta, 4 Antigens, 20 aa Linear Peptides (PEP20215042037)	30	42	YRYKYACQCKIPTNEETCDD	Erythrocyte membrane protein 1	0
University of Alberta, 4 Antigens, 20 aa Linear Peptides (PEP20215042037)	30	43	RYKYACQCKIPTNEETCDDR	Erythrocyte membrane protein 1	0
University of Alberta, 4 Antigens, 20 aa Linear Peptides (PEP20215042037)	30	44	YKYACQCKIPTNEETCDDRK	Erythrocyte membrane protein 1	0
University of Alberta, 4 Antigens, 20 aa Linear Peptides (PEP20215042037)	30	45	KYACQCKIPTNEETCDDRKE	Erythrocyte membrane protein 1	0
University of Alberta, 4 Antigens, 20 aa Linear Peptides (PEP20215042037)	30	46	YACQCKIPTNEETCDDRKEY	Erythrocyte membrane protein 1	0
University of Alberta, 4 Antigens, 20 aa Linear Peptides (PEP20215042037)	30	47	ACQCKIPTNEETCDDRKEYM	Erythrocyte membrane protein 1	0
University of Alberta, 4 Antigens, 20 aa Linear Peptides (PEP20215042037)	30	48	CQCKIPTNEETCDDRKEYMN	Erythrocyte membrane protein 1	0
University of Alberta, 4 Antigens, 20 aa Linear Peptides (PEP20215042037)	30	49	QCKIPTNEETCDDRKEYMNQ	Erythrocyte membrane protein 1	0
University of Alberta, 4 Antigens, 20 aa Linear Peptides (PEP20215042037)	30	50	CKIPTNEETCDDRKEYMNQW	Erythrocyte membrane protein 1	0
University of Alberta, 4 Antigens, 20 aa Linear Peptides (PEP20215042037)	30	51	KIPTNEETCDDRKEYMNQWS	Erythrocyte membrane protein 1	0
University of Alberta, 4 Antigens, 20 aa Linear Peptides (PEP20215042037)	30	52	IPTNEETCDDRKEYMNQWSC	Erythrocyte membrane protein 1	0
University of Alberta, 4 Antigens, 20 aa Linear Peptides (PEP20215042037)	30	53	PTNEETCDDRKEYMNQWSCG	Erythrocyte membrane protein 1	3
University of Alberta, 4 Antigens, 20 aa Linear Peptides (PEP20215042037)	30	54	TNEETCDDRKEYMNQWSCGS	Erythrocyte membrane protein 1	0
University of Alberta, 4 Antigens, 20 aa Linear Peptides (PEP20215042037)	30	55	NEETCDDRKEYMNQWSCGSA	Erythrocyte membrane protein 1	0
University of Alberta, 4 Antigens, 20 aa Linear Peptides (PEP20215042037)	30	56	EETCDDRKEYMNQWSCGSAR	Erythrocyte membrane protein 1	0
University of Alberta, 4 Antigens, 20 aa Linear Peptides (PEP20215042037)	30	57	ETCDDRKEYMNQWSCGSART	Erythrocyte membrane protein 1	0
University of Alberta, 4 Antigens, 20 aa Linear Peptides (PEP20215042037)	30	58	TCDDRKEYMNQWSCGSARTM	Erythrocyte membrane protein 1	0
University of Alberta, 4 Antigens, 20 aa Linear Peptides (PEP20215042037)	30	59	CDDRKEYMNQWSCGSARTMK	Erythrocyte membrane protein 1	0
University of Alberta, 4 Antigens, 20 aa Linear Peptides (PEP20215042037)	30	60	DDRKEYMNQWSCGSARTMKR	Erythrocyte membrane protein 1	0
University of Alberta, 4 Antigens, 20 aa Linear Peptides (PEP20215042037)	30	61	DRKEYMNQWSCGSARTMKRG	Erythrocyte membrane protein 1	0
University of Alberta, 4 Antigens, 20 aa Linear Peptides (PEP20215042037)	30	62	RKEYMNQWSCGSARTMKRGY	Erythrocyte membrane protein 1	0
University of Alberta, 4 Antigens, 20 aa Linear Peptides (PEP20215042037)	30	63	KEYMNQWSCGSARTMKRGYK	Erythrocyte membrane protein 1	92
University of Alberta, 4 Antigens, 20 aa Linear Peptides (PEP20215042037)	30	64	EYMNQWSCGSARTMKRGYKN	Erythrocyte membrane protein 1	0
University of Alberta, 4 Antigens, 20 aa Linear Peptides (PEP20215042037)	30	65	YMNQWSCGSARTMKRGYKND	Erythrocyte membrane protein 1	0
University of Alberta, 4 Antigens, 20 aa Linear Peptides (PEP20215042037)	30	66	MNQWSCGSARTMKRGYKNDN	Erythrocyte membrane protein 1	0
University of Alberta, 4 Antigens, 20 aa Linear Peptides (PEP20215042037)	30	67	NQWSCGSARTMKRGYKNDNY	Erythrocyte membrane protein 1	2
University of Alberta, 4 Antigens, 20 aa Linear Peptides (PEP20215042037)	32	2	QWSCGSARTMKRGYKNDNYE	Erythrocyte membrane protein 1	0
University of Alberta, 4 Antigens, 20 aa Linear Peptides (PEP20215042037)	32	3	WSCGSARTMKRGYKNDNYEL	Erythrocyte membrane protein 1	0
University of Alberta, 4 Antigens, 20 aa Linear Peptides (PEP20215042037)	32	4	SCGSARTMKRGYKNDNYELC	Erythrocyte membrane protein 1	6.5
University of Alberta, 4 Antigens, 20 aa Linear Peptides (PEP20215042037)	32	5	CGSARTMKRGYKNDNYELCK	Erythrocyte membrane protein 1	0
University of Alberta, 4 Antigens, 20 aa Linear Peptides (PEP20215042037)	32	6	GSARTMKRGYKNDNYELCKY	Erythrocyte membrane protein 1	0
University of Alberta, 4 Antigens, 20 aa Linear Peptides (PEP20215042037)	32	7	SARTMKRGYKNDNYELCKYN	Erythrocyte membrane protein 1	0
University of Alberta, 4 Antigens, 20 aa Linear Peptides (PEP20215042037)	32	8	ARTMKRGYKNDNYELCKYNG	Erythrocyte membrane protein 1	0
University of Alberta, 4 Antigens, 20 aa Linear Peptides (PEP20215042037)	32	9	RTMKRGYKNDNYELCKYNGV	Erythrocyte membrane protein 1	0
University of Alberta, 4 Antigens, 20 aa Linear Peptides (PEP20215042037)	32	10	TMKRGYKNDNYELCKYNGVD	Erythrocyte membrane protein 1	0
University of Alberta, 4 Antigens, 20 aa Linear Peptides (PEP20215042037)	32	11	MKRGYKNDNYELCKYNGVDV	Erythrocyte membrane protein 1	0
University of Alberta, 4 Antigens, 20 aa Linear Peptides (PEP20215042037)	32	12	KRGYKNDNYELCKYNGVDVK	Erythrocyte membrane protein 1	0
University of Alberta, 4 Antigens, 20 aa Linear Peptides (PEP20215042037)	32	13	RGYKNDNYELCKYNGVDVKP	Erythrocyte membrane protein 1	0
University of Alberta, 4 Antigens, 20 aa Linear Peptides (PEP20215042037)	32	14	GYKNDNYELCKYNGVDVKPT	Erythrocyte membrane protein 1	0
University of Alberta, 4 Antigens, 20 aa Linear Peptides (PEP20215042037)	32	15	YKNDNYELCKYNGVDVKPTT	Erythrocyte membrane protein 1	3
University of Alberta, 4 Antigens, 20 aa Linear Peptides (PEP20215042037)	32	16	KNDNYELCKYNGVDVKPTTV	Erythrocyte membrane protein 1	0
University of Alberta, 4 Antigens, 20 aa Linear Peptides (PEP20215042037)	32	17	NDNYELCKYNGVDVKPTTVR	Erythrocyte membrane protein 1	0
University of Alberta, 4 Antigens, 20 aa Linear Peptides (PEP20215042037)	32	18	DNYELCKYNGVDVKPTTVRS	Erythrocyte membrane protein 1	0
University of Alberta, 4 Antigens, 20 aa Linear Peptides (PEP20215042037)	32	19	NYELCKYNGVDVKPTTVRSN	Erythrocyte membrane protein 1	0
University of Alberta, 4 Antigens, 20 aa Linear Peptides (PEP20215042037)	32	20	YELCKYNGVDVKPTTVRSNS	Erythrocyte membrane protein 1	0
University of Alberta, 4 Antigens, 20 aa Linear Peptides (PEP20215042037)	32	21	ELCKYNGVDVKPTTVRSNSS	Erythrocyte membrane protein 1	0
University of Alberta, 4 Antigens, 20 aa Linear Peptides (PEP20215042037)	32	22	LCKYNGVDVKPTTVRSNSSK	Erythrocyte membrane protein 1	0
University of Alberta, 4 Antigens, 20 aa Linear Peptides (PEP20215042037)	32	23	CKYNGVDVKPTTVRSNSSKL	Erythrocyte membrane protein 1	0
University of Alberta, 4 Antigens, 20 aa Linear Peptides (PEP20215042037)	32	24	KYNGVDVKPTTVRSNSSKLD	Erythrocyte membrane protein 1	0
University of Alberta, 4 Antigens, 20 aa Linear Peptides (PEP20215042037)	32	25	YNGVDVKPTTVRSNSSKLDG	Erythrocyte membrane protein 1	1.25
University of Alberta, 4 Antigens, 20 aa Linear Peptides (PEP20215042037)	32	26	NGVDVKPTTVRSNSSKLDGN	Erythrocyte membrane protein 1	0
University of Alberta, 4 Antigens, 20 aa Linear Peptides (PEP20215042037)	32	27	GVDVKPTTVRSNSSKLDGND	Erythrocyte membrane protein 1	0
University of Alberta, 4 Antigens, 20 aa Linear Peptides (PEP20215042037)	32	28	VDVKPTTVRSNSSKLDGNDV	Erythrocyte membrane protein 1	0
University of Alberta, 4 Antigens, 20 aa Linear Peptides (PEP20215042037)	32	29	DVKPTTVRSNSSKLDGNDVT	Erythrocyte membrane protein 1	0
University of Alberta, 4 Antigens, 20 aa Linear Peptides (PEP20215042037)	32	30	VKPTTVRSNSSKLDGNDVTF	Erythrocyte membrane protein 1	7
University of Alberta, 4 Antigens, 20 aa Linear Peptides (PEP20215042037)	32	31	KPTTVRSNSSKLDGNDVTFF	Erythrocyte membrane protein 1	0
University of Alberta, 4 Antigens, 20 aa Linear Peptides (PEP20215042037)	32	32	PTTVRSNSSKLDGNDVTFFN	Erythrocyte membrane protein 1	0
University of Alberta, 4 Antigens, 20 aa Linear Peptides (PEP20215042037)	32	33	TTVRSNSSKLDGNDVTFFNL	Erythrocyte membrane protein 1	0
University of Alberta, 4 Antigens, 20 aa Linear Peptides (PEP20215042037)	32	34	TVRSNSSKLDGNDVTFFNLF	Erythrocyte membrane protein 1	1.5
University of Alberta, 4 Antigens, 20 aa Linear Peptides (PEP20215042037)	32	35	VRSNSSKLDGNDVTFFNLFE	Erythrocyte membrane protein 1	0
University of Alberta, 4 Antigens, 20 aa Linear Peptides (PEP20215042037)	32	36	RSNSSKLDGNDVTFFNLFEQ	Erythrocyte membrane protein 1	0
University of Alberta, 4 Antigens, 20 aa Linear Peptides (PEP20215042037)	32	37	SNSSKLDGNDVTFFNLFEQW	Erythrocyte membrane protein 1	0
University of Alberta, 4 Antigens, 20 aa Linear Peptides (PEP20215042037)	32	38	NSSKLDGNDVTFFNLFEQWN	Erythrocyte membrane protein 1	0
University of Alberta, 4 Antigens, 20 aa Linear Peptides (PEP20215042037)	32	39	SSKLDGNDVTFFNLFEQWNK	Erythrocyte membrane protein 1	0
University of Alberta, 4 Antigens, 20 aa Linear Peptides (PEP20215042037)	32	40	SKLDGNDVTFFNLFEQWNKE	Erythrocyte membrane protein 1	0
University of Alberta, 4 Antigens, 20 aa Linear Peptides (PEP20215042037)	32	41	KLDGNDVTFFNLFEQWNKEI	Erythrocyte membrane protein 1	0
University of Alberta, 4 Antigens, 20 aa Linear Peptides (PEP20215042037)	32	42	LDGNDVTFFNLFEQWNKEIQ	Erythrocyte membrane protein 1	0
University of Alberta, 4 Antigens, 20 aa Linear Peptides (PEP20215042037)	32	43	DGNDVTFFNLFEQWNKEIQY	Erythrocyte membrane protein 1	0
University of Alberta, 4 Antigens, 20 aa Linear Peptides (PEP20215042037)	32	44	GNDVTFFNLFEQWNKEIQYQ	Erythrocyte membrane protein 1	0
University of Alberta, 4 Antigens, 20 aa Linear Peptides (PEP20215042037)	32	45	NDVTFFNLFEQWNKEIQYQI	Erythrocyte membrane protein 1	0
University of Alberta, 4 Antigens, 20 aa Linear Peptides (PEP20215042037)	32	46	DVTFFNLFEQWNKEIQYQIE	Erythrocyte membrane protein 1	0
University of Alberta, 4 Antigens, 20 aa Linear Peptides (PEP20215042037)	32	47	VTFFNLFEQWNKEIQYQIEQ	Erythrocyte membrane protein 1	0
University of Alberta, 4 Antigens, 20 aa Linear Peptides (PEP20215042037)	32	48	TFFNLFEQWNKEIQYQIEQY	Erythrocyte membrane protein 1	0
University of Alberta, 4 Antigens, 20 aa Linear Peptides (PEP20215042037)	32	49	FFNLFEQWNKEIQYQIEQYM	Erythrocyte membrane protein 1	9
University of Alberta, 4 Antigens, 20 aa Linear Peptides (PEP20215042037)	32	50	FNLFEQWNKEIQYQIEQYMT	Erythrocyte membrane protein 1	0
University of Alberta, 4 Antigens, 20 aa Linear Peptides (PEP20215042037)	32	51	NLFEQWNKEIQYQIEQYMTN	Erythrocyte membrane protein 1	0
University of Alberta, 4 Antigens, 20 aa Linear Peptides (PEP20215042037)	32	52	LFEQWNKEIQYQIEQYMTNA	Erythrocyte membrane protein 1	0
University of Alberta, 4 Antigens, 20 aa Linear Peptides (PEP20215042037)	32	53	FEQWNKEIQYQIEQYMTNAN	Erythrocyte membrane protein 1	0
University of Alberta, 4 Antigens, 20 aa Linear Peptides (PEP20215042037)	32	54	EQWNKEIQYQIEQYMTNANI	Erythrocyte membrane protein 1	0
University of Alberta, 4 Antigens, 20 aa Linear Peptides (PEP20215042037)	32	55	QWNKEIQYQIEQYMTNANIS	Erythrocyte membrane protein 1	0
University of Alberta, 4 Antigens, 20 aa Linear Peptides (PEP20215042037)	32	56	WNKEIQYQIEQYMTNANISC	Erythrocyte membrane protein 1	0
University of Alberta, 4 Antigens, 20 aa Linear Peptides (PEP20215042037)	32	57	NKEIQYQIEQYMTNANISCI	Erythrocyte membrane protein 1	0
University of Alberta, 4 Antigens, 20 aa Linear Peptides (PEP20215042037)	32	58	KEIQYQIEQYMTNANISCID	Erythrocyte membrane protein 1	0
University of Alberta, 4 Antigens, 20 aa Linear Peptides (PEP20215042037)	32	59	EIQYQIEQYMTNANISCIDE	Erythrocyte membrane protein 1	0
University of Alberta, 4 Antigens, 20 aa Linear Peptides (PEP20215042037)	32	60	IQYQIEQYMTNANISCIDEK	Erythrocyte membrane protein 1	0
University of Alberta, 4 Antigens, 20 aa Linear Peptides (PEP20215042037)	32	61	QYQIEQYMTNANISCIDEKE	Erythrocyte membrane protein 1	0
University of Alberta, 4 Antigens, 20 aa Linear Peptides (PEP20215042037)	32	62	YQIEQYMTNANISCIDEKEV	Erythrocyte membrane protein 1	0
University of Alberta, 4 Antigens, 20 aa Linear Peptides (PEP20215042037)	32	63	QIEQYMTNANISCIDEKEVL	Erythrocyte membrane protein 1	0
University of Alberta, 4 Antigens, 20 aa Linear Peptides (PEP20215042037)	32	64	IEQYMTNANISCIDEKEVLD	Erythrocyte membrane protein 1	0
University of Alberta, 4 Antigens, 20 aa Linear Peptides (PEP20215042037)	32	65	EQYMTNANISCIDEKEVLDS	Erythrocyte membrane protein 1	0
University of Alberta, 4 Antigens, 20 aa Linear Peptides (PEP20215042037)	32	66	QYMTNANISCIDEKEVLDSV	Erythrocyte membrane protein 1	0
University of Alberta, 4 Antigens, 20 aa Linear Peptides (PEP20215042037)	32	67	YMTNANISCIDEKEVLDSVS	Erythrocyte membrane protein 1	0
University of Alberta, 4 Antigens, 20 aa Linear Peptides (PEP20215042037)	34	2	MTNANISCIDEKEVLDSVSD	Erythrocyte membrane protein 1	0
University of Alberta, 4 Antigens, 20 aa Linear Peptides (PEP20215042037)	34	3	TNANISCIDEKEVLDSVSDE	Erythrocyte membrane protein 1	0
University of Alberta, 4 Antigens, 20 aa Linear Peptides (PEP20215042037)	34	4	NANISCIDEKEVLDSVSDEG	Erythrocyte membrane protein 1	0
University of Alberta, 4 Antigens, 20 aa Linear Peptides (PEP20215042037)	34	5	ANISCIDEKEVLDSVSDEGT	Erythrocyte membrane protein 1	0
University of Alberta, 4 Antigens, 20 aa Linear Peptides (PEP20215042037)	34	6	NISCIDEKEVLDSVSDEGTP	Erythrocyte membrane protein 1	0
University of Alberta, 4 Antigens, 20 aa Linear Peptides (PEP20215042037)	34	7	ISCIDEKEVLDSVSDEGTPK	Erythrocyte membrane protein 1	0
University of Alberta, 4 Antigens, 20 aa Linear Peptides (PEP20215042037)	34	8	SCIDEKEVLDSVSDEGTPKV	Erythrocyte membrane protein 1	0
University of Alberta, 4 Antigens, 20 aa Linear Peptides (PEP20215042037)	34	9	CIDEKEVLDSVSDEGTPKVR	Erythrocyte membrane protein 1	0
University of Alberta, 4 Antigens, 20 aa Linear Peptides (PEP20215042037)	34	10	IDEKEVLDSVSDEGTPKVRG	Erythrocyte membrane protein 1	0
University of Alberta, 4 Antigens, 20 aa Linear Peptides (PEP20215042037)	34	11	DEKEVLDSVSDEGTPKVRGG	Erythrocyte membrane protein 1	0
University of Alberta, 4 Antigens, 20 aa Linear Peptides (PEP20215042037)	34	12	EKEVLDSVSDEGTPKVRGGY	Erythrocyte membrane protein 1	0
University of Alberta, 4 Antigens, 20 aa Linear Peptides (PEP20215042037)	34	13	KEVLDSVSDEGTPKVRGGYE	Erythrocyte membrane protein 1	0
University of Alberta, 4 Antigens, 20 aa Linear Peptides (PEP20215042037)	34	14	EVLDSVSDEGTPKVRGGYED	Erythrocyte membrane protein 1	0
University of Alberta, 4 Antigens, 20 aa Linear Peptides (PEP20215042037)	34	15	VLDSVSDEGTPKVRGGYEDG	Erythrocyte membrane protein 1	0
University of Alberta, 4 Antigens, 20 aa Linear Peptides (PEP20215042037)	34	16	LDSVSDEGTPKVRGGYEDGR	Erythrocyte membrane protein 1	0
University of Alberta, 4 Antigens, 20 aa Linear Peptides (PEP20215042037)	34	17	DSVSDEGTPKVRGGYEDGRN	Erythrocyte membrane protein 1	0
University of Alberta, 4 Antigens, 20 aa Linear Peptides (PEP20215042037)	34	18	SVSDEGTPKVRGGYEDGRNN	Erythrocyte membrane protein 1	0
University of Alberta, 4 Antigens, 20 aa Linear Peptides (PEP20215042037)	34	19	VSDEGTPKVRGGYEDGRNNN	Erythrocyte membrane protein 1	0
University of Alberta, 4 Antigens, 20 aa Linear Peptides (PEP20215042037)	34	20	SDEGTPKVRGGYEDGRNNNT	Erythrocyte membrane protein 1	0
University of Alberta, 4 Antigens, 20 aa Linear Peptides (PEP20215042037)	34	21	DEGTPKVRGGYEDGRNNNTD	Erythrocyte membrane protein 1	0
University of Alberta, 4 Antigens, 20 aa Linear Peptides (PEP20215042037)	34	22	EGTPKVRGGYEDGRNNNTDQ	Erythrocyte membrane protein 1	0
University of Alberta, 4 Antigens, 20 aa Linear Peptides (PEP20215042037)	34	23	GTPKVRGGYEDGRNNNTDQG	Erythrocyte membrane protein 1	0
University of Alberta, 4 Antigens, 20 aa Linear Peptides (PEP20215042037)	34	24	TPKVRGGYEDGRNNNTDQGT	Erythrocyte membrane protein 1	0
University of Alberta, 4 Antigens, 20 aa Linear Peptides (PEP20215042037)	34	25	PKVRGGYEDGRNNNTDQGTN	Erythrocyte membrane protein 1	0
University of Alberta, 4 Antigens, 20 aa Linear Peptides (PEP20215042037)	34	26	KVRGGYEDGRNNNTDQGTNC	Erythrocyte membrane protein 1	0
University of Alberta, 4 Antigens, 20 aa Linear Peptides (PEP20215042037)	34	27	VRGGYEDGRNNNTDQGTNCK	Erythrocyte membrane protein 1	0
University of Alberta, 4 Antigens, 20 aa Linear Peptides (PEP20215042037)	34	28	RGGYEDGRNNNTDQGTNCKE	Erythrocyte membrane protein 1	0
University of Alberta, 4 Antigens, 20 aa Linear Peptides (PEP20215042037)	34	29	GGYEDGRNNNTDQGTNCKEK	Erythrocyte membrane protein 1	0
University of Alberta, 4 Antigens, 20 aa Linear Peptides (PEP20215042037)	34	30	GYEDGRNNNTDQGTNCKEKC	Erythrocyte membrane protein 1	2.5
University of Alberta, 4 Antigens, 20 aa Linear Peptides (PEP20215042037)	34	31	YEDGRNNNTDQGTNCKEKCK	Erythrocyte membrane protein 1	0
University of Alberta, 4 Antigens, 20 aa Linear Peptides (PEP20215042037)	34	32	EDGRNNNTDQGTNCKEKCKC	Erythrocyte membrane protein 1	0
University of Alberta, 4 Antigens, 20 aa Linear Peptides (PEP20215042037)	34	33	DGRNNNTDQGTNCKEKCKCY	Erythrocyte membrane protein 1	0
University of Alberta, 4 Antigens, 20 aa Linear Peptides (PEP20215042037)	34	34	GRNNNTDQGTNCKEKCKCYK	Erythrocyte membrane protein 1	0
University of Alberta, 4 Antigens, 20 aa Linear Peptides (PEP20215042037)	34	35	RNNNTDQGTNCKEKCKCYKL	Erythrocyte membrane protein 1	0
University of Alberta, 4 Antigens, 20 aa Linear Peptides (PEP20215042037)	34	36	NNNTDQGTNCKEKCKCYKLW	Erythrocyte membrane protein 1	0
University of Alberta, 4 Antigens, 20 aa Linear Peptides (PEP20215042037)	34	37	NNTDQGTNCKEKCKCYKLWI	Erythrocyte membrane protein 1	0
University of Alberta, 4 Antigens, 20 aa Linear Peptides (PEP20215042037)	34	38	NTDQGTNCKEKCKCYKLWIE	Erythrocyte membrane protein 1	0
University of Alberta, 4 Antigens, 20 aa Linear Peptides (PEP20215042037)	34	39	TDQGTNCKEKCKCYKLWIEK	Erythrocyte membrane protein 1	0
University of Alberta, 4 Antigens, 20 aa Linear Peptides (PEP20215042037)	34	40	DQGTNCKEKCKCYKLWIEKI	Erythrocyte membrane protein 1	0
University of Alberta, 4 Antigens, 20 aa Linear Peptides (PEP20215042037)	34	41	QGTNCKEKCKCYKLWIEKIN	Erythrocyte membrane protein 1	0
University of Alberta, 4 Antigens, 20 aa Linear Peptides (PEP20215042037)	34	42	GTNCKEKCKCYKLWIEKIND	Erythrocyte membrane protein 1	0
University of Alberta, 4 Antigens, 20 aa Linear Peptides (PEP20215042037)	34	43	TNCKEKCKCYKLWIEKINDQ	Erythrocyte membrane protein 1	0
University of Alberta, 4 Antigens, 20 aa Linear Peptides (PEP20215042037)	34	44	NCKEKCKCYKLWIEKINDQW	Erythrocyte membrane protein 1	0
University of Alberta, 4 Antigens, 20 aa Linear Peptides (PEP20215042037)	34	45	CKEKCKCYKLWIEKINDQWG	Erythrocyte membrane protein 1	0
University of Alberta, 4 Antigens, 20 aa Linear Peptides (PEP20215042037)	34	46	KEKCKCYKLWIEKINDQWGK	Erythrocyte membrane protein 1	0
University of Alberta, 4 Antigens, 20 aa Linear Peptides (PEP20215042037)	34	47	EKCKCYKLWIEKINDQWGKQ	Erythrocyte membrane protein 1	0
University of Alberta, 4 Antigens, 20 aa Linear Peptides (PEP20215042037)	34	48	KCKCYKLWIEKINDQWGKQK	Erythrocyte membrane protein 1	0
University of Alberta, 4 Antigens, 20 aa Linear Peptides (PEP20215042037)	34	49	CKCYKLWIEKINDQWGKQKD	Erythrocyte membrane protein 1	0
University of Alberta, 4 Antigens, 20 aa Linear Peptides (PEP20215042037)	34	50	KCYKLWIEKINDQWGKQKDN	Erythrocyte membrane protein 1	0
University of Alberta, 4 Antigens, 20 aa Linear Peptides (PEP20215042037)	34	51	CYKLWIEKINDQWGKQKDNY	Erythrocyte membrane protein 1	0
University of Alberta, 4 Antigens, 20 aa Linear Peptides (PEP20215042037)	34	52	YKLWIEKINDQWGKQKDNYN	Erythrocyte membrane protein 1	0
University of Alberta, 4 Antigens, 20 aa Linear Peptides (PEP20215042037)	34	53	KLWIEKINDQWGKQKDNYNK	Erythrocyte membrane protein 1	0
University of Alberta, 4 Antigens, 20 aa Linear Peptides (PEP20215042037)	34	54	LWIEKINDQWGKQKDNYNKF	Erythrocyte membrane protein 1	0
University of Alberta, 4 Antigens, 20 aa Linear Peptides (PEP20215042037)	34	55	WIEKINDQWGKQKDNYNKFR	Erythrocyte membrane protein 1	97
University of Alberta, 4 Antigens, 20 aa Linear Peptides (PEP20215042037)	34	56	IEKINDQWGKQKDNYNKFRS	Erythrocyte membrane protein 1	1
University of Alberta, 4 Antigens, 20 aa Linear Peptides (PEP20215042037)	34	57	EKINDQWGKQKDNYNKFRSK	Erythrocyte membrane protein 1	98
University of Alberta, 4 Antigens, 20 aa Linear Peptides (PEP20215042037)	34	58	KINDQWGKQKDNYNKFRSKQ	Erythrocyte membrane protein 1	0
University of Alberta, 4 Antigens, 20 aa Linear Peptides (PEP20215042037)	34	59	INDQWGKQKDNYNKFRSKQI	Erythrocyte membrane protein 1	0
University of Alberta, 4 Antigens, 20 aa Linear Peptides (PEP20215042037)	34	60	NDQWGKQKDNYNKFRSKQIY	Erythrocyte membrane protein 1	0
University of Alberta, 4 Antigens, 20 aa Linear Peptides (PEP20215042037)	34	61	DQWGKQKDNYNKFRSKQIYD	Erythrocyte membrane protein 1	0
University of Alberta, 4 Antigens, 20 aa Linear Peptides (PEP20215042037)	34	62	QWGKQKDNYNKFRSKQIYDA	Erythrocyte membrane protein 1	0
University of Alberta, 4 Antigens, 20 aa Linear Peptides (PEP20215042037)	34	63	WGKQKDNYNKFRSKQIYDAN	Erythrocyte membrane protein 1	0
University of Alberta, 4 Antigens, 20 aa Linear Peptides (PEP20215042037)	34	64	GKQKDNYNKFRSKQIYDANK	Erythrocyte membrane protein 1	0
University of Alberta, 4 Antigens, 20 aa Linear Peptides (PEP20215042037)	34	65	KQKDNYNKFRSKQIYDANKG	Erythrocyte membrane protein 1	2.5
University of Alberta, 4 Antigens, 20 aa Linear Peptides (PEP20215042037)	34	66	QKDNYNKFRSKQIYDANKGS	Erythrocyte membrane protein 1	0
University of Alberta, 4 Antigens, 20 aa Linear Peptides (PEP20215042037)	34	67	KDNYNKFRSKQIYDANKGSQ	Erythrocyte membrane protein 1	0
University of Alberta, 4 Antigens, 20 aa Linear Peptides (PEP20215042037)	36	2	DNYNKFRSKQIYDANKGSQN	Erythrocyte membrane protein 1	0
University of Alberta, 4 Antigens, 20 aa Linear Peptides (PEP20215042037)	36	3	NYNKFRSKQIYDANKGSQNK	Erythrocyte membrane protein 1	0
University of Alberta, 4 Antigens, 20 aa Linear Peptides (PEP20215042037)	36	4	YNKFRSKQIYDANKGSQNKK	Erythrocyte membrane protein 1	0
University of Alberta, 4 Antigens, 20 aa Linear Peptides (PEP20215042037)	36	5	NKFRSKQIYDANKGSQNKKV	Erythrocyte membrane protein 1	0
University of Alberta, 4 Antigens, 20 aa Linear Peptides (PEP20215042037)	36	6	KFRSKQIYDANKGSQNKKVV	Erythrocyte membrane protein 1	0
University of Alberta, 4 Antigens, 20 aa Linear Peptides (PEP20215042037)	36	7	FRSKQIYDANKGSQNKKVVS	Erythrocyte membrane protein 1	0
University of Alberta, 4 Antigens, 20 aa Linear Peptides (PEP20215042037)	36	8	RSKQIYDANKGSQNKKVVSL	Erythrocyte membrane protein 1	0
University of Alberta, 4 Antigens, 20 aa Linear Peptides (PEP20215042037)	36	9	SKQIYDANKGSQNKKVVSLS	Erythrocyte membrane protein 1	0
University of Alberta, 4 Antigens, 20 aa Linear Peptides (PEP20215042037)	36	10	KQIYDANKGSQNKKVVSLSN	Erythrocyte membrane protein 1	0
University of Alberta, 4 Antigens, 20 aa Linear Peptides (PEP20215042037)	36	11	QIYDANKGSQNKKVVSLSNF	Erythrocyte membrane protein 1	0
University of Alberta, 4 Antigens, 20 aa Linear Peptides (PEP20215042037)	36	12	IYDANKGSQNKKVVSLSNFL	Erythrocyte membrane protein 1	3
University of Alberta, 4 Antigens, 20 aa Linear Peptides (PEP20215042037)	36	13	YDANKGSQNKKVVSLSNFLF	Erythrocyte membrane protein 1	0
University of Alberta, 4 Antigens, 20 aa Linear Peptides (PEP20215042037)	36	14	DANKGSQNKKVVSLSNFLFF	Erythrocyte membrane protein 1	0
University of Alberta, 4 Antigens, 20 aa Linear Peptides (PEP20215042037)	36	15	ANKGSQNKKVVSLSNFLFFS	Erythrocyte membrane protein 1	0
University of Alberta, 4 Antigens, 20 aa Linear Peptides (PEP20215042037)	36	16	NKGSQNKKVVSLSNFLFFSC	Erythrocyte membrane protein 1	0
University of Alberta, 4 Antigens, 20 aa Linear Peptides (PEP20215042037)	36	17	KGSQNKKVVSLSNFLFFSCW	Erythrocyte membrane protein 1	0
University of Alberta, 4 Antigens, 20 aa Linear Peptides (PEP20215042037)	36	18	GSQNKKVVSLSNFLFFSCWE	Erythrocyte membrane protein 1	0
University of Alberta, 4 Antigens, 20 aa Linear Peptides (PEP20215042037)	36	19	SQNKKVVSLSNFLFFSCWEE	Erythrocyte membrane protein 1	0
University of Alberta, 4 Antigens, 20 aa Linear Peptides (PEP20215042037)	36	20	QNKKVVSLSNFLFFSCWEEY	Erythrocyte membrane protein 1	0
University of Alberta, 4 Antigens, 20 aa Linear Peptides (PEP20215042037)	36	21	NKKVVSLSNFLFFSCWEEYI	Erythrocyte membrane protein 1	0
University of Alberta, 4 Antigens, 20 aa Linear Peptides (PEP20215042037)	36	22	KKVVSLSNFLFFSCWEEYIQ	Erythrocyte membrane protein 1	0
University of Alberta, 4 Antigens, 20 aa Linear Peptides (PEP20215042037)	36	23	KVVSLSNFLFFSCWEEYIQK	Erythrocyte membrane protein 1	0
University of Alberta, 4 Antigens, 20 aa Linear Peptides (PEP20215042037)	36	24	VVSLSNFLFFSCWEEYIQKY	Erythrocyte membrane protein 1	0
University of Alberta, 4 Antigens, 20 aa Linear Peptides (PEP20215042037)	36	25	VSLSNFLFFSCWEEYIQKYF	Erythrocyte membrane protein 1	0
University of Alberta, 4 Antigens, 20 aa Linear Peptides (PEP20215042037)	36	26	SLSNFLFFSCWEEYIQKYFN	Erythrocyte membrane protein 1	0
University of Alberta, 4 Antigens, 20 aa Linear Peptides (PEP20215042037)	36	27	LSNFLFFSCWEEYIQKYFNG	Erythrocyte membrane protein 1	0
University of Alberta, 4 Antigens, 20 aa Linear Peptides (PEP20215042037)	36	28	SNFLFFSCWEEYIQKYFNGD	Erythrocyte membrane protein 1	0
University of Alberta, 4 Antigens, 20 aa Linear Peptides (PEP20215042037)	36	29	NFLFFSCWEEYIQKYFNGDW	Erythrocyte membrane protein 1	0
University of Alberta, 4 Antigens, 20 aa Linear Peptides (PEP20215042037)	36	30	FLFFSCWEEYIQKYFNGDWS	Erythrocyte membrane protein 1	0
University of Alberta, 4 Antigens, 20 aa Linear Peptides (PEP20215042037)	36	31	LFFSCWEEYIQKYFNGDWSK	Erythrocyte membrane protein 1	0
University of Alberta, 4 Antigens, 20 aa Linear Peptides (PEP20215042037)	36	32	FFSCWEEYIQKYFNGDWSKI	Erythrocyte membrane protein 1	0
University of Alberta, 4 Antigens, 20 aa Linear Peptides (PEP20215042037)	36	33	FSCWEEYIQKYFNGDWSKIK	Erythrocyte membrane protein 1	0
University of Alberta, 4 Antigens, 20 aa Linear Peptides (PEP20215042037)	36	34	SCWEEYIQKYFNGDWSKIKN	Erythrocyte membrane protein 1	0
University of Alberta, 4 Antigens, 20 aa Linear Peptides (PEP20215042037)	36	35	CWEEYIQKYFNGDWSKIKNI	Erythrocyte membrane protein 1	0
University of Alberta, 4 Antigens, 20 aa Linear Peptides (PEP20215042037)	36	36	WEEYIQKYFNGDWSKIKNIG	Erythrocyte membrane protein 1	0
University of Alberta, 4 Antigens, 20 aa Linear Peptides (PEP20215042037)	36	37	EEYIQKYFNGDWSKIKNIGS	Erythrocyte membrane protein 1	0
University of Alberta, 4 Antigens, 20 aa Linear Peptides (PEP20215042037)	36	38	EYIQKYFNGDWSKIKNIGSD	Erythrocyte membrane protein 1	0
University of Alberta, 4 Antigens, 20 aa Linear Peptides (PEP20215042037)	36	39	YIQKYFNGDWSKIKNIGSDT	Erythrocyte membrane protein 1	0
University of Alberta, 4 Antigens, 20 aa Linear Peptides (PEP20215042037)	36	40	IQKYFNGDWSKIKNIGSDTF	Erythrocyte membrane protein 1	2.5
University of Alberta, 4 Antigens, 20 aa Linear Peptides (PEP20215042037)	36	41	QKYFNGDWSKIKNIGSDTFE	Erythrocyte membrane protein 1	0
University of Alberta, 4 Antigens, 20 aa Linear Peptides (PEP20215042037)	36	42	KYFNGDWSKIKNIGSDTFEF	Erythrocyte membrane protein 1	0
University of Alberta, 4 Antigens, 20 aa Linear Peptides (PEP20215042037)	36	43	YFNGDWSKIKNIGSDTFEFL	Erythrocyte membrane protein 1	0
University of Alberta, 4 Antigens, 20 aa Linear Peptides (PEP20215042037)	36	44	FNGDWSKIKNIGSDTFEFLI	Erythrocyte membrane protein 1	0
University of Alberta, 4 Antigens, 20 aa Linear Peptides (PEP20215042037)	36	45	NGDWSKIKNIGSDTFEFLIK	Erythrocyte membrane protein 1	0
University of Alberta, 4 Antigens, 20 aa Linear Peptides (PEP20215042037)	36	46	GDWSKIKNIGSDTFEFLIKK	Erythrocyte membrane protein 1	0
University of Alberta, 4 Antigens, 20 aa Linear Peptides (PEP20215042037)	36	47	DWSKIKNIGSDTFEFLIKKC	Erythrocyte membrane protein 1	0
University of Alberta, 4 Antigens, 20 aa Linear Peptides (PEP20215042037)	36	48	WSKIKNIGSDTFEFLIKKCG	Erythrocyte membrane protein 1	0
University of Alberta, 4 Antigens, 20 aa Linear Peptides (PEP20215042037)	36	49	SKIKNIGSDTFEFLIKKCGN	Erythrocyte membrane protein 1	0.75
University of Alberta, 4 Antigens, 20 aa Linear Peptides (PEP20215042037)	36	50	KIKNIGSDTFEFLIKKCGNN	Erythrocyte membrane protein 1	0
University of Alberta, 4 Antigens, 20 aa Linear Peptides (PEP20215042037)	36	51	IKNIGSDTFEFLIKKCGNNS	Erythrocyte membrane protein 1	0
University of Alberta, 4 Antigens, 20 aa Linear Peptides (PEP20215042037)	36	52	KNIGSDTFEFLIKKCGNNSA	Erythrocyte membrane protein 1	0
University of Alberta, 4 Antigens, 20 aa Linear Peptides (PEP20215042037)	36	53	NIGSDTFEFLIKKCGNNSAH	Erythrocyte membrane protein 1	0
University of Alberta, 4 Antigens, 20 aa Linear Peptides (PEP20215042037)	36	54	IGSDTFEFLIKKCGNNSAHG	Erythrocyte membrane protein 1	0
University of Alberta, 4 Antigens, 20 aa Linear Peptides (PEP20215042037)	36	55	GSDTFEFLIKKCGNNSAHGE	Erythrocyte membrane protein 1	0
University of Alberta, 4 Antigens, 20 aa Linear Peptides (PEP20215042037)	36	56	SDTFEFLIKKCGNNSAHGEE	Erythrocyte membrane protein 1	0
University of Alberta, 4 Antigens, 20 aa Linear Peptides (PEP20215042037)	36	57	DTFEFLIKKCGNNSAHGEEI	Erythrocyte membrane protein 1	0
University of Alberta, 4 Antigens, 20 aa Linear Peptides (PEP20215042037)	36	58	TFEFLIKKCGNNSAHGEEIF	Erythrocyte membrane protein 1	0
University of Alberta, 4 Antigens, 20 aa Linear Peptides (PEP20215042037)	36	59	FEFLIKKCGNNSAHGEEIFN	Erythrocyte membrane protein 1	0
University of Alberta, 4 Antigens, 20 aa Linear Peptides (PEP20215042037)	36	60	EFLIKKCGNNSAHGEEIFNE	Erythrocyte membrane protein 1	0
University of Alberta, 4 Antigens, 20 aa Linear Peptides (PEP20215042037)	36	61	FLIKKCGNNSAHGEEIFNEK	Erythrocyte membrane protein 1	0
University of Alberta, 4 Antigens, 20 aa Linear Peptides (PEP20215042037)	36	62	LIKKCGNNSAHGEEIFNEKL	Erythrocyte membrane protein 1	0
University of Alberta, 4 Antigens, 20 aa Linear Peptides (PEP20215042037)	36	63	IKKCGNNSAHGEEIFNEKLK	Erythrocyte membrane protein 1	0
University of Alberta, 4 Antigens, 20 aa Linear Peptides (PEP20215042037)	36	64	KKCGNNSAHGEEIFNEKLKN	Erythrocyte membrane protein 1	0
University of Alberta, 4 Antigens, 20 aa Linear Peptides (PEP20215042037)	36	65	KCGNNSAHGEEIFNEKLKNA	Erythrocyte membrane protein 1	0
University of Alberta, 4 Antigens, 20 aa Linear Peptides (PEP20215042037)	36	66	CGNNSAHGEEIFNEKLKNAE	Erythrocyte membrane protein 1	0
University of Alberta, 4 Antigens, 20 aa Linear Peptides (PEP20215042037)	36	67	GNNSAHGEEIFNEKLKNAEK	Erythrocyte membrane protein 1	0
University of Alberta, 4 Antigens, 20 aa Linear Peptides (PEP20215042037)	38	2	NNSAHGEEIFNEKLKNAEKK	Erythrocyte membrane protein 1	0
University of Alberta, 4 Antigens, 20 aa Linear Peptides (PEP20215042037)	38	3	NSAHGEEIFNEKLKNAEKKC	Erythrocyte membrane protein 1	0
University of Alberta, 4 Antigens, 20 aa Linear Peptides (PEP20215042037)	38	4	SAHGEEIFNEKLKNAEKKCK	Erythrocyte membrane protein 1	0
University of Alberta, 4 Antigens, 20 aa Linear Peptides (PEP20215042037)	38	5	AHGEEIFNEKLKNAEKKCKE	Erythrocyte membrane protein 1	0
University of Alberta, 4 Antigens, 20 aa Linear Peptides (PEP20215042037)	38	6	HGEEIFNEKLKNAEKKCKEN	Erythrocyte membrane protein 1	0
University of Alberta, 4 Antigens, 20 aa Linear Peptides (PEP20215042037)	38	7	GEEIFNEKLKNAEKKCKENE	Erythrocyte membrane protein 1	0
University of Alberta, 4 Antigens, 20 aa Linear Peptides (PEP20215042037)	38	8	EEIFNEKLKNAEKKCKENES	Erythrocyte membrane protein 1	0
University of Alberta, 4 Antigens, 20 aa Linear Peptides (PEP20215042037)	38	9	EIFNEKLKNAEKKCKENEST	Erythrocyte membrane protein 1	0
University of Alberta, 4 Antigens, 20 aa Linear Peptides (PEP20215042037)	38	10	IFNEKLKNAEKKCKENESTD	Erythrocyte membrane protein 1	0
University of Alberta, 4 Antigens, 20 aa Linear Peptides (PEP20215042037)	38	11	FNEKLKNAEKKCKENESTDT	Erythrocyte membrane protein 1	0
University of Alberta, 4 Antigens, 20 aa Linear Peptides (PEP20215042037)	38	12	NEKLKNAEKKCKENESTDTN	Erythrocyte membrane protein 1	0
University of Alberta, 4 Antigens, 20 aa Linear Peptides (PEP20215042037)	38	13	EKLKNAEKKCKENESTDTNI	Erythrocyte membrane protein 1	0
University of Alberta, 4 Antigens, 20 aa Linear Peptides (PEP20215042037)	38	14	KLKNAEKKCKENESTDTNIN	Erythrocyte membrane protein 1	0
University of Alberta, 4 Antigens, 20 aa Linear Peptides (PEP20215042037)	38	15	LKNAEKKCKENESTDTNINK	Erythrocyte membrane protein 1	1
University of Alberta, 4 Antigens, 20 aa Linear Peptides (PEP20215042037)	38	16	KNAEKKCKENESTDTNINKS	Erythrocyte membrane protein 1	0
University of Alberta, 4 Antigens, 20 aa Linear Peptides (PEP20215042037)	38	17	NAEKKCKENESTDTNINKSE	Erythrocyte membrane protein 1	0
University of Alberta, 4 Antigens, 20 aa Linear Peptides (PEP20215042037)	38	18	AEKKCKENESTDTNINKSET	Erythrocyte membrane protein 1	0
University of Alberta, 4 Antigens, 20 aa Linear Peptides (PEP20215042037)	38	19	EKKCKENESTDTNINKSETS	Erythrocyte membrane protein 1	0
University of Alberta, 4 Antigens, 20 aa Linear Peptides (PEP20215042037)	38	20	KKCKENESTDTNINKSETSC	Erythrocyte membrane protein 1	0
University of Alberta, 4 Antigens, 20 aa Linear Peptides (PEP20215042037)	38	21	KCKENESTDTNINKSETSCD	Erythrocyte membrane protein 1	0
University of Alberta, 4 Antigens, 20 aa Linear Peptides (PEP20215042037)	38	22	CKENESTDTNINKSETSCDL	Erythrocyte membrane protein 1	0
University of Alberta, 4 Antigens, 20 aa Linear Peptides (PEP20215042037)	38	23	KENESTDTNINKSETSCDLN	Erythrocyte membrane protein 1	0
University of Alberta, 4 Antigens, 20 aa Linear Peptides (PEP20215042037)	38	24	ENESTDTNINKSETSCDLNA	Erythrocyte membrane protein 1	0
University of Alberta, 4 Antigens, 20 aa Linear Peptides (PEP20215042037)	38	25	NESTDTNINKSETSCDLNAT	Erythrocyte membrane protein 1	0
University of Alberta, 4 Antigens, 20 aa Linear Peptides (PEP20215042037)	38	26	ESTDTNINKSETSCDLNATN	Erythrocyte membrane protein 1	1.5
University of Alberta, 4 Antigens, 20 aa Linear Peptides (PEP20215042037)	38	27	STDTNINKSETSCDLNATNY	Erythrocyte membrane protein 1	0
University of Alberta, 4 Antigens, 20 aa Linear Peptides (PEP20215042037)	38	28	TDTNINKSETSCDLNATNYI	Erythrocyte membrane protein 1	0
University of Alberta, 4 Antigens, 20 aa Linear Peptides (PEP20215042037)	38	29	DTNINKSETSCDLNATNYIR	Erythrocyte membrane protein 1	0
University of Alberta, 4 Antigens, 20 aa Linear Peptides (PEP20215042037)	38	30	TNINKSETSCDLNATNYIRG	Erythrocyte membrane protein 1	0
University of Alberta, 4 Antigens, 20 aa Linear Peptides (PEP20215042037)	38	31	NINKSETSCDLNATNYIRGC	Erythrocyte membrane protein 1	0
University of Alberta, 4 Antigens, 20 aa Linear Peptides (PEP20215042037)	38	32	INKSETSCDLNATNYIRGCQ	Erythrocyte membrane protein 1	0
University of Alberta, 4 Antigens, 20 aa Linear Peptides (PEP20215042037)	38	33	NKSETSCDLNATNYIRGCQS	Erythrocyte membrane protein 1	0
University of Alberta, 4 Antigens, 20 aa Linear Peptides (PEP20215042037)	38	34	KSETSCDLNATNYIRGCQSK	Erythrocyte membrane protein 1	0
University of Alberta, 4 Antigens, 20 aa Linear Peptides (PEP20215042037)	38	35	SETSCDLNATNYIRGCQSKT	Erythrocyte membrane protein 1	0
University of Alberta, 4 Antigens, 20 aa Linear Peptides (PEP20215042037)	38	36	ETSCDLNATNYIRGCQSKTY	Erythrocyte membrane protein 1	0
University of Alberta, 4 Antigens, 20 aa Linear Peptides (PEP20215042037)	38	37	TSCDLNATNYIRGCQSKTYD	Erythrocyte membrane protein 1	0
University of Alberta, 4 Antigens, 20 aa Linear Peptides (PEP20215042037)	38	38	SCDLNATNYIRGCQSKTYDG	Erythrocyte membrane protein 1	0
University of Alberta, 4 Antigens, 20 aa Linear Peptides (PEP20215042037)	38	39	CDLNATNYIRGCQSKTYDGK	Erythrocyte membrane protein 1	0
University of Alberta, 4 Antigens, 20 aa Linear Peptides (PEP20215042037)	38	40	DLNATNYIRGCQSKTYDGKI	Erythrocyte membrane protein 1	0
University of Alberta, 4 Antigens, 20 aa Linear Peptides (PEP20215042037)	38	41	LNATNYIRGCQSKTYDGKIF	Erythrocyte membrane protein 1	1
University of Alberta, 4 Antigens, 20 aa Linear Peptides (PEP20215042037)	38	42	NATNYIRGCQSKTYDGKIFP	Erythrocyte membrane protein 1	0
University of Alberta, 4 Antigens, 20 aa Linear Peptides (PEP20215042037)	38	43	ATNYIRGCQSKTYDGKIFPG	Erythrocyte membrane protein 1	0
University of Alberta, 4 Antigens, 20 aa Linear Peptides (PEP20215042037)	38	44	TNYIRGCQSKTYDGKIFPGK	Erythrocyte membrane protein 1	0
University of Alberta, 4 Antigens, 20 aa Linear Peptides (PEP20215042037)	38	45	NYIRGCQSKTYDGKIFPGKG	Erythrocyte membrane protein 1	0
University of Alberta, 4 Antigens, 20 aa Linear Peptides (PEP20215042037)	38	46	YIRGCQSKTYDGKIFPGKGG	Erythrocyte membrane protein 1	0
University of Alberta, 4 Antigens, 20 aa Linear Peptides (PEP20215042037)	38	47	IRGCQSKTYDGKIFPGKGGE	Erythrocyte membrane protein 1	0
University of Alberta, 4 Antigens, 20 aa Linear Peptides (PEP20215042037)	38	48	RGCQSKTYDGKIFPGKGGEK	Erythrocyte membrane protein 1	3.75
University of Alberta, 4 Antigens, 20 aa Linear Peptides (PEP20215042037)	38	49	GCQSKTYDGKIFPGKGGEKQ	Erythrocyte membrane protein 1	0
University of Alberta, 4 Antigens, 20 aa Linear Peptides (PEP20215042037)	38	50	CQSKTYDGKIFPGKGGEKQW	Erythrocyte membrane protein 1	0
University of Alberta, 4 Antigens, 20 aa Linear Peptides (PEP20215042037)	38	51	QSKTYDGKIFPGKGGEKQWI	Erythrocyte membrane protein 1	0
University of Alberta, 4 Antigens, 20 aa Linear Peptides (PEP20215042037)	38	52	SKTYDGKIFPGKGGEKQWIC	Erythrocyte membrane protein 1	2
University of Alberta, 4 Antigens, 20 aa Linear Peptides (PEP20215042037)	38	53	KTYDGKIFPGKGGEKQWICK	Erythrocyte membrane protein 1	0
University of Alberta, 4 Antigens, 20 aa Linear Peptides (PEP20215042037)	38	54	TYDGKIFPGKGGEKQWICKD	Erythrocyte membrane protein 1	0
University of Alberta, 4 Antigens, 20 aa Linear Peptides (PEP20215042037)	38	55	YDGKIFPGKGGEKQWICKDT	Erythrocyte membrane protein 1	0
University of Alberta, 4 Antigens, 20 aa Linear Peptides (PEP20215042037)	38	56	DGKIFPGKGGEKQWICKDTI	Erythrocyte membrane protein 1	0
University of Alberta, 4 Antigens, 20 aa Linear Peptides (PEP20215042037)	38	57	GKIFPGKGGEKQWICKDTII	Erythrocyte membrane protein 1	0
University of Alberta, 4 Antigens, 20 aa Linear Peptides (PEP20215042037)	38	58	KIFPGKGGEKQWICKDTIIH	Erythrocyte membrane protein 1	0
University of Alberta, 4 Antigens, 20 aa Linear Peptides (PEP20215042037)	38	59	IFPGKGGEKQWICKDTIIHG	Erythrocyte membrane protein 1	0
University of Alberta, 4 Antigens, 20 aa Linear Peptides (PEP20215042037)	38	60	FPGKGGEKQWICKDTIIHGD	Erythrocyte membrane protein 1	0
University of Alberta, 4 Antigens, 20 aa Linear Peptides (PEP20215042037)	38	61	PGKGGEKQWICKDTIIHGDT	Erythrocyte membrane protein 1	0
University of Alberta, 4 Antigens, 20 aa Linear Peptides (PEP20215042037)	38	62	GKGGEKQWICKDTIIHGDTN	Erythrocyte membrane protein 1	0
University of Alberta, 4 Antigens, 20 aa Linear Peptides (PEP20215042037)	38	63	KGGEKQWICKDTIIHGDTNG	Erythrocyte membrane protein 1	0
University of Alberta, 4 Antigens, 20 aa Linear Peptides (PEP20215042037)	38	64	GGEKQWICKDTIIHGDTNGA	Erythrocyte membrane protein 1	0
University of Alberta, 4 Antigens, 20 aa Linear Peptides (PEP20215042037)	38	65	GEKQWICKDTIIHGDTNGAC	Erythrocyte membrane protein 1	0
University of Alberta, 4 Antigens, 20 aa Linear Peptides (PEP20215042037)	38	66	EKQWICKDTIIHGDTNGACI	Erythrocyte membrane protein 1	0
University of Alberta, 4 Antigens, 20 aa Linear Peptides (PEP20215042037)	38	67	KQWICKDTIIHGDTNGACIP	Erythrocyte membrane protein 1	0
University of Alberta, 4 Antigens, 20 aa Linear Peptides (PEP20215042037)	40	2	QWICKDTIIHGDTNGACIPP	Erythrocyte membrane protein 1	0
University of Alberta, 4 Antigens, 20 aa Linear Peptides (PEP20215042037)	40	3	WICKDTIIHGDTNGACIPPR	Erythrocyte membrane protein 1	0
University of Alberta, 4 Antigens, 20 aa Linear Peptides (PEP20215042037)	40	4	ICKDTIIHGDTNGACIPPRT	Erythrocyte membrane protein 1	0
University of Alberta, 4 Antigens, 20 aa Linear Peptides (PEP20215042037)	40	5	CKDTIIHGDTNGACIPPRTQ	Erythrocyte membrane protein 1	0
University of Alberta, 4 Antigens, 20 aa Linear Peptides (PEP20215042037)	40	6	KDTIIHGDTNGACIPPRTQN	Erythrocyte membrane protein 1	0
University of Alberta, 4 Antigens, 20 aa Linear Peptides (PEP20215042037)	40	7	DTIIHGDTNGACIPPRTQNL	Erythrocyte membrane protein 1	0
University of Alberta, 4 Antigens, 20 aa Linear Peptides (PEP20215042037)	40	8	TIIHGDTNGACIPPRTQNLC	Erythrocyte membrane protein 1	0
University of Alberta, 4 Antigens, 20 aa Linear Peptides (PEP20215042037)	40	9	IIHGDTNGACIPPRTQNLCV	Erythrocyte membrane protein 1	0
University of Alberta, 4 Antigens, 20 aa Linear Peptides (PEP20215042037)	40	10	IHGDTNGACIPPRTQNLCVG	Erythrocyte membrane protein 1	0
University of Alberta, 4 Antigens, 20 aa Linear Peptides (PEP20215042037)	40	11	HGDTNGACIPPRTQNLCVGE	Erythrocyte membrane protein 1	0
University of Alberta, 4 Antigens, 20 aa Linear Peptides (PEP20215042037)	40	12	GDTNGACIPPRTQNLCVGEL	Erythrocyte membrane protein 1	0
University of Alberta, 4 Antigens, 20 aa Linear Peptides (PEP20215042037)	40	13	DTNGACIPPRTQNLCVGELW	Erythrocyte membrane protein 1	0
University of Alberta, 4 Antigens, 20 aa Linear Peptides (PEP20215042037)	40	14	TNGACIPPRTQNLCVGELWD	Erythrocyte membrane protein 1	0
University of Alberta, 4 Antigens, 20 aa Linear Peptides (PEP20215042037)	40	15	NGACIPPRTQNLCVGELWDK	Erythrocyte membrane protein 1	0
University of Alberta, 4 Antigens, 20 aa Linear Peptides (PEP20215042037)	40	16	GACIPPRTQNLCVGELWDKS	Erythrocyte membrane protein 1	0
University of Alberta, 4 Antigens, 20 aa Linear Peptides (PEP20215042037)	40	17	ACIPPRTQNLCVGELWDKSY	Erythrocyte membrane protein 1	0
University of Alberta, 4 Antigens, 20 aa Linear Peptides (PEP20215042037)	40	18	CIPPRTQNLCVGELWDKSYG	Erythrocyte membrane protein 1	0
University of Alberta, 4 Antigens, 20 aa Linear Peptides (PEP20215042037)	40	19	IPPRTQNLCVGELWDKSYGG	Erythrocyte membrane protein 1	0
University of Alberta, 4 Antigens, 20 aa Linear Peptides (PEP20215042037)	40	20	PPRTQNLCVGELWDKSYGGR	Erythrocyte membrane protein 1	0
University of Alberta, 4 Antigens, 20 aa Linear Peptides (PEP20215042037)	40	21	PRTQNLCVGELWDKSYGGRS	Erythrocyte membrane protein 1	0
University of Alberta, 4 Antigens, 20 aa Linear Peptides (PEP20215042037)	40	22	RTQNLCVGELWDKSYGGRSN	Erythrocyte membrane protein 1	0
University of Alberta, 4 Antigens, 20 aa Linear Peptides (PEP20215042037)	40	23	TQNLCVGELWDKSYGGRSNI	Erythrocyte membrane protein 1	0
University of Alberta, 4 Antigens, 20 aa Linear Peptides (PEP20215042037)	40	24	QNLCVGELWDKSYGGRSNIK	Erythrocyte membrane protein 1	111
University of Alberta, 4 Antigens, 20 aa Linear Peptides (PEP20215042037)	40	25	NLCVGELWDKSYGGRSNIKN	Erythrocyte membrane protein 1	0
University of Alberta, 4 Antigens, 20 aa Linear Peptides (PEP20215042037)	40	26	LCVGELWDKSYGGRSNIKND	Erythrocyte membrane protein 1	0
University of Alberta, 4 Antigens, 20 aa Linear Peptides (PEP20215042037)	40	27	CVGELWDKSYGGRSNIKNDT	Erythrocyte membrane protein 1	0
University of Alberta, 4 Antigens, 20 aa Linear Peptides (PEP20215042037)	40	28	VGELWDKSYGGRSNIKNDTK	Erythrocyte membrane protein 1	2.75
University of Alberta, 4 Antigens, 20 aa Linear Peptides (PEP20215042037)	40	29	GELWDKSYGGRSNIKNDTKE	Erythrocyte membrane protein 1	0
University of Alberta, 4 Antigens, 20 aa Linear Peptides (PEP20215042037)	40	30	ELWDKSYGGRSNIKNDTKEL	Erythrocyte membrane protein 1	0
University of Alberta, 4 Antigens, 20 aa Linear Peptides (PEP20215042037)	40	31	LWDKSYGGRSNIKNDTKELL	Erythrocyte membrane protein 1	0
University of Alberta, 4 Antigens, 20 aa Linear Peptides (PEP20215042037)	40	32	WDKSYGGRSNIKNDTKELLK	Erythrocyte membrane protein 1	0
University of Alberta, 4 Antigens, 20 aa Linear Peptides (PEP20215042037)	40	33	DKSYGGRSNIKNDTKELLKE	Erythrocyte membrane protein 1	0
University of Alberta, 4 Antigens, 20 aa Linear Peptides (PEP20215042037)	40	34	KSYGGRSNIKNDTKELLKEK	Erythrocyte membrane protein 1	0
University of Alberta, 4 Antigens, 20 aa Linear Peptides (PEP20215042037)	40	35	SYGGRSNIKNDTKELLKEKI	Erythrocyte membrane protein 1	0
University of Alberta, 4 Antigens, 20 aa Linear Peptides (PEP20215042037)	40	36	YGGRSNIKNDTKELLKEKIK	Erythrocyte membrane protein 1	118
University of Alberta, 4 Antigens, 20 aa Linear Peptides (PEP20215042037)	40	37	GGRSNIKNDTKELLKEKIKN	Erythrocyte membrane protein 1	0
University of Alberta, 4 Antigens, 20 aa Linear Peptides (PEP20215042037)	40	38	GRSNIKNDTKELLKEKIKNA	Erythrocyte membrane protein 1	0
University of Alberta, 4 Antigens, 20 aa Linear Peptides (PEP20215042037)	40	39	RSNIKNDTKELLKEKIKNAI	Erythrocyte membrane protein 1	0
University of Alberta, 4 Antigens, 20 aa Linear Peptides (PEP20215042037)	40	40	SNIKNDTKELLKEKIKNAIH	Erythrocyte membrane protein 1	0
University of Alberta, 4 Antigens, 20 aa Linear Peptides (PEP20215042037)	40	41	NIKNDTKELLKEKIKNAIHK	Erythrocyte membrane protein 1	0
University of Alberta, 4 Antigens, 20 aa Linear Peptides (PEP20215042037)	40	42	IKNDTKELLKEKIKNAIHKE	Erythrocyte membrane protein 1	0
University of Alberta, 4 Antigens, 20 aa Linear Peptides (PEP20215042037)	40	43	KNDTKELLKEKIKNAIHKET	Erythrocyte membrane protein 1	0
University of Alberta, 4 Antigens, 20 aa Linear Peptides (PEP20215042037)	40	44	NDTKELLKEKIKNAIHKETE	Erythrocyte membrane protein 1	0
University of Alberta, 4 Antigens, 20 aa Linear Peptides (PEP20215042037)	40	45	DTKELLKEKIKNAIHKETEL	Erythrocyte membrane protein 1	0
University of Alberta, 4 Antigens, 20 aa Linear Peptides (PEP20215042037)	40	46	TKELLKEKIKNAIHKETELL	Erythrocyte membrane protein 1	0
University of Alberta, 4 Antigens, 20 aa Linear Peptides (PEP20215042037)	40	47	KELLKEKIKNAIHKETELLY	Erythrocyte membrane protein 1	5.5
University of Alberta, 4 Antigens, 20 aa Linear Peptides (PEP20215042037)	40	48	ELLKEKIKNAIHKETELLYE	Erythrocyte membrane protein 1	0
University of Alberta, 4 Antigens, 20 aa Linear Peptides (PEP20215042037)	40	49	LLKEKIKNAIHKETELLYEY	Erythrocyte membrane protein 1	0
University of Alberta, 4 Antigens, 20 aa Linear Peptides (PEP20215042037)	40	50	LKEKIKNAIHKETELLYEYH	Erythrocyte membrane protein 1	0
University of Alberta, 4 Antigens, 20 aa Linear Peptides (PEP20215042037)	40	51	KEKIKNAIHKETELLYEYHD	Erythrocyte membrane protein 1	0
University of Alberta, 4 Antigens, 20 aa Linear Peptides (PEP20215042037)	40	52	EKIKNAIHKETELLYEYHDT	Erythrocyte membrane protein 1	0
University of Alberta, 4 Antigens, 20 aa Linear Peptides (PEP20215042037)	40	53	KIKNAIHKETELLYEYHDTG	Erythrocyte membrane protein 1	0
University of Alberta, 4 Antigens, 20 aa Linear Peptides (PEP20215042037)	40	54	IKNAIHKETELLYEYHDTGT	Erythrocyte membrane protein 1	0
University of Alberta, 4 Antigens, 20 aa Linear Peptides (PEP20215042037)	40	55	KNAIHKETELLYEYHDTGTA	Erythrocyte membrane protein 1	0
University of Alberta, 4 Antigens, 20 aa Linear Peptides (PEP20215042037)	40	56	NAIHKETELLYEYHDTGTAI	Erythrocyte membrane protein 1	0
University of Alberta, 4 Antigens, 20 aa Linear Peptides (PEP20215042037)	40	57	AIHKETELLYEYHDTGTAII	Erythrocyte membrane protein 1	0
University of Alberta, 4 Antigens, 20 aa Linear Peptides (PEP20215042037)	40	58	IHKETELLYEYHDTGTAIIS	Erythrocyte membrane protein 1	0
University of Alberta, 4 Antigens, 20 aa Linear Peptides (PEP20215042037)	40	59	HKETELLYEYHDTGTAIISK	Erythrocyte membrane protein 1	0
University of Alberta, 4 Antigens, 20 aa Linear Peptides (PEP20215042037)	40	60	KETELLYEYHDTGTAIISKN	Erythrocyte membrane protein 1	0
University of Alberta, 4 Antigens, 20 aa Linear Peptides (PEP20215042037)	40	61	ETELLYEYHDTGTAIISKND	Erythrocyte membrane protein 1	0
University of Alberta, 4 Antigens, 20 aa Linear Peptides (PEP20215042037)	40	62	TELLYEYHDTGTAIISKNDK	Erythrocyte membrane protein 1	0
University of Alberta, 4 Antigens, 20 aa Linear Peptides (PEP20215042037)	40	63	ELLYEYHDTGTAIISKNDKK	Erythrocyte membrane protein 1	0
University of Alberta, 4 Antigens, 20 aa Linear Peptides (PEP20215042037)	40	64	LLYEYHDTGTAIISKNDKKG	Erythrocyte membrane protein 1	0
University of Alberta, 4 Antigens, 20 aa Linear Peptides (PEP20215042037)	40	65	LYEYHDTGTAIISKNDKKGQ	Erythrocyte membrane protein 1	0
University of Alberta, 4 Antigens, 20 aa Linear Peptides (PEP20215042037)	40	66	YEYHDTGTAIISKNDKKGQK	Erythrocyte membrane protein 1	0
University of Alberta, 4 Antigens, 20 aa Linear Peptides (PEP20215042037)	40	67	EYHDTGTAIISKNDKKGQKG	Erythrocyte membrane protein 1	0
University of Alberta, 4 Antigens, 20 aa Linear Peptides (PEP20215042037)	42	2	YHDTGTAIISKNDKKGQKGK	Erythrocyte membrane protein 1	0
University of Alberta, 4 Antigens, 20 aa Linear Peptides (PEP20215042037)	42	3	HDTGTAIISKNDKKGQKGKN	Erythrocyte membrane protein 1	0
University of Alberta, 4 Antigens, 20 aa Linear Peptides (PEP20215042037)	42	4	DTGTAIISKNDKKGQKGKND	Erythrocyte membrane protein 1	0
University of Alberta, 4 Antigens, 20 aa Linear Peptides (PEP20215042037)	42	5	TGTAIISKNDKKGQKGKNDP	Erythrocyte membrane protein 1	0
University of Alberta, 4 Antigens, 20 aa Linear Peptides (PEP20215042037)	42	6	GTAIISKNDKKGQKGKNDPN	Erythrocyte membrane protein 1	0
University of Alberta, 4 Antigens, 20 aa Linear Peptides (PEP20215042037)	42	7	TAIISKNDKKGQKGKNDPNG	Erythrocyte membrane protein 1	0
University of Alberta, 4 Antigens, 20 aa Linear Peptides (PEP20215042037)	42	8	AIISKNDKKGQKGKNDPNGL	Erythrocyte membrane protein 1	0
University of Alberta, 4 Antigens, 20 aa Linear Peptides (PEP20215042037)	42	9	IISKNDKKGQKGKNDPNGLP	Erythrocyte membrane protein 1	0
University of Alberta, 4 Antigens, 20 aa Linear Peptides (PEP20215042037)	42	10	ISKNDKKGQKGKNDPNGLPK	Erythrocyte membrane protein 1	0
University of Alberta, 4 Antigens, 20 aa Linear Peptides (PEP20215042037)	42	11	SKNDKKGQKGKNDPNGLPKG	Erythrocyte membrane protein 1	0
University of Alberta, 4 Antigens, 20 aa Linear Peptides (PEP20215042037)	42	12	KNDKKGQKGKNDPNGLPKGF	Erythrocyte membrane protein 1	0
University of Alberta, 4 Antigens, 20 aa Linear Peptides (PEP20215042037)	42	13	NDKKGQKGKNDPNGLPKGFC	Erythrocyte membrane protein 1	0
University of Alberta, 4 Antigens, 20 aa Linear Peptides (PEP20215042037)	42	14	DKKGQKGKNDPNGLPKGFCH	Erythrocyte membrane protein 1	1.5
University of Alberta, 4 Antigens, 20 aa Linear Peptides (PEP20215042037)	42	15	KKGQKGKNDPNGLPKGFCHA	Erythrocyte membrane protein 1	0
University of Alberta, 4 Antigens, 20 aa Linear Peptides (PEP20215042037)	42	16	KGQKGKNDPNGLPKGFCHAV	Erythrocyte membrane protein 1	0
University of Alberta, 4 Antigens, 20 aa Linear Peptides (PEP20215042037)	42	17	GQKGKNDPNGLPKGFCHAVQ	Erythrocyte membrane protein 1	0
University of Alberta, 4 Antigens, 20 aa Linear Peptides (PEP20215042037)	42	18	QKGKNDPNGLPKGFCHAVQR	Erythrocyte membrane protein 1	0
University of Alberta, 4 Antigens, 20 aa Linear Peptides (PEP20215042037)	42	19	KGKNDPNGLPKGFCHAVQRS	Erythrocyte membrane protein 1	0
University of Alberta, 4 Antigens, 20 aa Linear Peptides (PEP20215042037)	42	20	GKNDPNGLPKGFCHAVQRSF	Erythrocyte membrane protein 1	0
University of Alberta, 4 Antigens, 20 aa Linear Peptides (PEP20215042037)	42	21	KNDPNGLPKGFCHAVQRSFI	Erythrocyte membrane protein 1	0
University of Alberta, 4 Antigens, 20 aa Linear Peptides (PEP20215042037)	42	22	NDPNGLPKGFCHAVQRSFID	Erythrocyte membrane protein 1	0
University of Alberta, 4 Antigens, 20 aa Linear Peptides (PEP20215042037)	42	23	DPNGLPKGFCHAVQRSFIDY	Erythrocyte membrane protein 1	0
University of Alberta, 4 Antigens, 20 aa Linear Peptides (PEP20215042037)	42	24	PNGLPKGFCHAVQRSFIDYK	Erythrocyte membrane protein 1	0
University of Alberta, 4 Antigens, 20 aa Linear Peptides (PEP20215042037)	42	25	NGLPKGFCHAVQRSFIDYKN	Erythrocyte membrane protein 1	0
University of Alberta, 4 Antigens, 20 aa Linear Peptides (PEP20215042037)	42	26	GLPKGFCHAVQRSFIDYKNM	Erythrocyte membrane protein 1	0
University of Alberta, 4 Antigens, 20 aa Linear Peptides (PEP20215042037)	42	27	LPKGFCHAVQRSFIDYKNMI	Erythrocyte membrane protein 1	0
University of Alberta, 4 Antigens, 20 aa Linear Peptides (PEP20215042037)	42	28	PKGFCHAVQRSFIDYKNMIL	Erythrocyte membrane protein 1	0
University of Alberta, 4 Antigens, 20 aa Linear Peptides (PEP20215042037)	42	29	KGFCHAVQRSFIDYKNMILG	Erythrocyte membrane protein 1	0
University of Alberta, 4 Antigens, 20 aa Linear Peptides (PEP20215042037)	42	30	GFCHAVQRSFIDYKNMILGT	Erythrocyte membrane protein 1	0
University of Alberta, 4 Antigens, 20 aa Linear Peptides (PEP20215042037)	42	31	FCHAVQRSFIDYKNMILGTS	Erythrocyte membrane protein 1	0
University of Alberta, 4 Antigens, 20 aa Linear Peptides (PEP20215042037)	42	32	CHAVQRSFIDYKNMILGTSV	Erythrocyte membrane protein 1	3.5
University of Alberta, 4 Antigens, 20 aa Linear Peptides (PEP20215042037)	42	33	HAVQRSFIDYKNMILGTSVN	Erythrocyte membrane protein 1	0
University of Alberta, 4 Antigens, 20 aa Linear Peptides (PEP20215042037)	42	34	AVQRSFIDYKNMILGTSVNI	Erythrocyte membrane protein 1	0
University of Alberta, 4 Antigens, 20 aa Linear Peptides (PEP20215042037)	42	35	VQRSFIDYKNMILGTSVNIY	Erythrocyte membrane protein 1	0
University of Alberta, 4 Antigens, 20 aa Linear Peptides (PEP20215042037)	42	36	QRSFIDYKNMILGTSVNIYE	Erythrocyte membrane protein 1	0
University of Alberta, 4 Antigens, 20 aa Linear Peptides (PEP20215042037)	42	37	RSFIDYKNMILGTSVNIYEH	Erythrocyte membrane protein 1	0
University of Alberta, 4 Antigens, 20 aa Linear Peptides (PEP20215042037)	42	38	SFIDYKNMILGTSVNIYEHI	Erythrocyte membrane protein 1	0
University of Alberta, 4 Antigens, 20 aa Linear Peptides (PEP20215042037)	42	39	FIDYKNMILGTSVNIYEHIG	Erythrocyte membrane protein 1	0
University of Alberta, 4 Antigens, 20 aa Linear Peptides (PEP20215042037)	42	40	IDYKNMILGTSVNIYEHIGK	Erythrocyte membrane protein 1	0
University of Alberta, 4 Antigens, 20 aa Linear Peptides (PEP20215042037)	42	41	DYKNMILGTSVNIYEHIGKL	Erythrocyte membrane protein 1	0
University of Alberta, 4 Antigens, 20 aa Linear Peptides (PEP20215042037)	42	42	YKNMILGTSVNIYEHIGKLQ	Erythrocyte membrane protein 1	0
University of Alberta, 4 Antigens, 20 aa Linear Peptides (PEP20215042037)	42	43	KNMILGTSVNIYEHIGKLQE	Erythrocyte membrane protein 1	0
University of Alberta, 4 Antigens, 20 aa Linear Peptides (PEP20215042037)	42	44	NMILGTSVNIYEHIGKLQED	Erythrocyte membrane protein 1	0
University of Alberta, 4 Antigens, 20 aa Linear Peptides (PEP20215042037)	42	45	MILGTSVNIYEHIGKLQEDI	Erythrocyte membrane protein 1	0
University of Alberta, 4 Antigens, 20 aa Linear Peptides (PEP20215042037)	42	46	ILGTSVNIYEHIGKLQEDIK	Erythrocyte membrane protein 1	0
University of Alberta, 4 Antigens, 20 aa Linear Peptides (PEP20215042037)	42	47	LGTSVNIYEHIGKLQEDIKK	Erythrocyte membrane protein 1	0
University of Alberta, 4 Antigens, 20 aa Linear Peptides (PEP20215042037)	42	48	GTSVNIYEHIGKLQEDIKKI	Erythrocyte membrane protein 1	0
University of Alberta, 4 Antigens, 20 aa Linear Peptides (PEP20215042037)	42	49	TSVNIYEHIGKLQEDIKKII	Erythrocyte membrane protein 1	0
University of Alberta, 4 Antigens, 20 aa Linear Peptides (PEP20215042037)	42	50	SVNIYEHIGKLQEDIKKIIE	Erythrocyte membrane protein 1	1.5
University of Alberta, 4 Antigens, 20 aa Linear Peptides (PEP20215042037)	42	51	VNIYEHIGKLQEDIKKIIEK	Erythrocyte membrane protein 1	0
University of Alberta, 4 Antigens, 20 aa Linear Peptides (PEP20215042037)	42	52	NIYEHIGKLQEDIKKIIEKG	Erythrocyte membrane protein 1	0
University of Alberta, 4 Antigens, 20 aa Linear Peptides (PEP20215042037)	42	53	IYEHIGKLQEDIKKIIEKGT	Erythrocyte membrane protein 1	0
University of Alberta, 4 Antigens, 20 aa Linear Peptides (PEP20215042037)	42	54	YEHIGKLQEDIKKIIEKGTP	Erythrocyte membrane protein 1	0
University of Alberta, 4 Antigens, 20 aa Linear Peptides (PEP20215042037)	42	55	EHIGKLQEDIKKIIEKGTPQ	Erythrocyte membrane protein 1	0
University of Alberta, 4 Antigens, 20 aa Linear Peptides (PEP20215042037)	42	56	HIGKLQEDIKKIIEKGTPQQ	Erythrocyte membrane protein 1	0
University of Alberta, 4 Antigens, 20 aa Linear Peptides (PEP20215042037)	42	57	IGKLQEDIKKIIEKGTPQQK	Erythrocyte membrane protein 1	0
University of Alberta, 4 Antigens, 20 aa Linear Peptides (PEP20215042037)	42	58	GKLQEDIKKIIEKGTPQQKD	Erythrocyte membrane protein 1	0
University of Alberta, 4 Antigens, 20 aa Linear Peptides (PEP20215042037)	42	59	KLQEDIKKIIEKGTPQQKDK	Erythrocyte membrane protein 1	0
University of Alberta, 4 Antigens, 20 aa Linear Peptides (PEP20215042037)	42	60	LQEDIKKIIEKGTPQQKDKI	Erythrocyte membrane protein 1	0
University of Alberta, 4 Antigens, 20 aa Linear Peptides (PEP20215042037)	42	61	QEDIKKIIEKGTPQQKDKIG	Erythrocyte membrane protein 1	0
University of Alberta, 4 Antigens, 20 aa Linear Peptides (PEP20215042037)	42	62	EDIKKIIEKGTPQQKDKIGG	Erythrocyte membrane protein 1	0
University of Alberta, 4 Antigens, 20 aa Linear Peptides (PEP20215042037)	42	63	DIKKIIEKGTPQQKDKIGGV	Erythrocyte membrane protein 1	0
University of Alberta, 4 Antigens, 20 aa Linear Peptides (PEP20215042037)	42	64	IKKIIEKGTPQQKDKIGGVG	Erythrocyte membrane protein 1	0
University of Alberta, 4 Antigens, 20 aa Linear Peptides (PEP20215042037)	42	65	KKIIEKGTPQQKDKIGGVGS	Erythrocyte membrane protein 1	0
University of Alberta, 4 Antigens, 20 aa Linear Peptides (PEP20215042037)	42	66	KIIEKGTPQQKDKIGGVGSS	Erythrocyte membrane protein 1	0
University of Alberta, 4 Antigens, 20 aa Linear Peptides (PEP20215042037)	42	67	IIEKGTPQQKDKIGGVGSST	Erythrocyte membrane protein 1	0
University of Alberta, 4 Antigens, 20 aa Linear Peptides (PEP20215042037)	44	2	IEKGTPQQKDKIGGVGSSTE	Erythrocyte membrane protein 1	0
University of Alberta, 4 Antigens, 20 aa Linear Peptides (PEP20215042037)	44	3	EKGTPQQKDKIGGVGSSTEN	Erythrocyte membrane protein 1	0
University of Alberta, 4 Antigens, 20 aa Linear Peptides (PEP20215042037)	44	4	KGTPQQKDKIGGVGSSTENV	Erythrocyte membrane protein 1	0
University of Alberta, 4 Antigens, 20 aa Linear Peptides (PEP20215042037)	44	5	GTPQQKDKIGGVGSSTENVN	Erythrocyte membrane protein 1	0
University of Alberta, 4 Antigens, 20 aa Linear Peptides (PEP20215042037)	44	6	TPQQKDKIGGVGSSTENVNA	Erythrocyte membrane protein 1	0
University of Alberta, 4 Antigens, 20 aa Linear Peptides (PEP20215042037)	44	7	PQQKDKIGGVGSSTENVNAW	Erythrocyte membrane protein 1	0
University of Alberta, 4 Antigens, 20 aa Linear Peptides (PEP20215042037)	44	8	QQKDKIGGVGSSTENVNAWW	Erythrocyte membrane protein 1	0
University of Alberta, 4 Antigens, 20 aa Linear Peptides (PEP20215042037)	44	9	QKDKIGGVGSSTENVNAWWK	Erythrocyte membrane protein 1	0
University of Alberta, 4 Antigens, 20 aa Linear Peptides (PEP20215042037)	44	10	KDKIGGVGSSTENVNAWWKG	Erythrocyte membrane protein 1	0
University of Alberta, 4 Antigens, 20 aa Linear Peptides (PEP20215042037)	44	11	DKIGGVGSSTENVNAWWKGI	Erythrocyte membrane protein 1	0
University of Alberta, 4 Antigens, 20 aa Linear Peptides (PEP20215042037)	44	12	KIGGVGSSTENVNAWWKGIE	Erythrocyte membrane protein 1	0
University of Alberta, 4 Antigens, 20 aa Linear Peptides (PEP20215042037)	44	13	IGGVGSSTENVNAWWKGIER	Erythrocyte membrane protein 1	0
University of Alberta, 4 Antigens, 20 aa Linear Peptides (PEP20215042037)	44	14	GGVGSSTENVNAWWKGIERE	Erythrocyte membrane protein 1	0
University of Alberta, 4 Antigens, 20 aa Linear Peptides (PEP20215042037)	44	15	GVGSSTENVNAWWKGIEREM	Erythrocyte membrane protein 1	0
University of Alberta, 4 Antigens, 20 aa Linear Peptides (PEP20215042037)	44	16	VGSSTENVNAWWKGIEREMW	Erythrocyte membrane protein 1	0
University of Alberta, 4 Antigens, 20 aa Linear Peptides (PEP20215042037)	44	17	GSSTENVNAWWKGIEREMWD	Erythrocyte membrane protein 1	0
University of Alberta, 4 Antigens, 20 aa Linear Peptides (PEP20215042037)	44	18	SSTENVNAWWKGIEREMWDA	Erythrocyte membrane protein 1	0
University of Alberta, 4 Antigens, 20 aa Linear Peptides (PEP20215042037)	44	19	STENVNAWWKGIEREMWDAV	Erythrocyte membrane protein 1	0
University of Alberta, 4 Antigens, 20 aa Linear Peptides (PEP20215042037)	44	20	TENVNAWWKGIEREMWDAVR	Erythrocyte membrane protein 1	0
University of Alberta, 4 Antigens, 20 aa Linear Peptides (PEP20215042037)	44	21	ENVNAWWKGIEREMWDAVRC	Erythrocyte membrane protein 1	3.5
University of Alberta, 4 Antigens, 20 aa Linear Peptides (PEP20215042037)	44	22	NVNAWWKGIEREMWDAVRCA	Erythrocyte membrane protein 1	0
University of Alberta, 4 Antigens, 20 aa Linear Peptides (PEP20215042037)	44	23	VNAWWKGIEREMWDAVRCAI	Erythrocyte membrane protein 1	0
University of Alberta, 4 Antigens, 20 aa Linear Peptides (PEP20215042037)	44	24	NAWWKGIEREMWDAVRCAIT	Erythrocyte membrane protein 1	0
University of Alberta, 4 Antigens, 20 aa Linear Peptides (PEP20215042037)	44	25	AWWKGIEREMWDAVRCAITK	Erythrocyte membrane protein 1	0
University of Alberta, 4 Antigens, 20 aa Linear Peptides (PEP20215042037)	44	26	WWKGIEREMWDAVRCAITKI	Erythrocyte membrane protein 1	0
University of Alberta, 4 Antigens, 20 aa Linear Peptides (PEP20215042037)	44	27	WKGIEREMWDAVRCAITKIN	Erythrocyte membrane protein 1	0
University of Alberta, 4 Antigens, 20 aa Linear Peptides (PEP20215042037)	44	28	KGIEREMWDAVRCAITKINK	Erythrocyte membrane protein 1	0
University of Alberta, 4 Antigens, 20 aa Linear Peptides (PEP20215042037)	44	29	GIEREMWDAVRCAITKINKK	Erythrocyte membrane protein 1	0
University of Alberta, 4 Antigens, 20 aa Linear Peptides (PEP20215042037)	44	30	IEREMWDAVRCAITKINKKN	Erythrocyte membrane protein 1	0
University of Alberta, 4 Antigens, 20 aa Linear Peptides (PEP20215042037)	44	31	EREMWDAVRCAITKINKKNN	Erythrocyte membrane protein 1	0
University of Alberta, 4 Antigens, 20 aa Linear Peptides (PEP20215042037)	44	32	REMWDAVRCAITKINKKNNN	Erythrocyte membrane protein 1	0
University of Alberta, 4 Antigens, 20 aa Linear Peptides (PEP20215042037)	44	33	EMWDAVRCAITKINKKNNNS	Erythrocyte membrane protein 1	0
University of Alberta, 4 Antigens, 20 aa Linear Peptides (PEP20215042037)	44	34	MWDAVRCAITKINKKNNNSI	Erythrocyte membrane protein 1	0
University of Alberta, 4 Antigens, 20 aa Linear Peptides (PEP20215042037)	44	35	WDAVRCAITKINKKNNNSIF	Erythrocyte membrane protein 1	0
University of Alberta, 4 Antigens, 20 aa Linear Peptides (PEP20215042037)	44	36	DAVRCAITKINKKNNNSIFN	Erythrocyte membrane protein 1	0
University of Alberta, 4 Antigens, 20 aa Linear Peptides (PEP20215042037)	44	37	AVRCAITKINKKNNNSIFNG	Erythrocyte membrane protein 1	0
University of Alberta, 4 Antigens, 20 aa Linear Peptides (PEP20215042037)	44	38	VRCAITKINKKNNNSIFNGD	Erythrocyte membrane protein 1	0
University of Alberta, 4 Antigens, 20 aa Linear Peptides (PEP20215042037)	44	39	RCAITKINKKNNNSIFNGDE	Erythrocyte membrane protein 1	0
University of Alberta, 4 Antigens, 20 aa Linear Peptides (PEP20215042037)	44	40	CAITKINKKNNNSIFNGDEC	Erythrocyte membrane protein 1	0
University of Alberta, 4 Antigens, 20 aa Linear Peptides (PEP20215042037)	44	41	AITKINKKNNNSIFNGDECG	Erythrocyte membrane protein 1	0
University of Alberta, 4 Antigens, 20 aa Linear Peptides (PEP20215042037)	44	42	ITKINKKNNNSIFNGDECGV	Erythrocyte membrane protein 1	0
University of Alberta, 4 Antigens, 20 aa Linear Peptides (PEP20215042037)	44	43	TKINKKNNNSIFNGDECGVS	Erythrocyte membrane protein 1	0
University of Alberta, 4 Antigens, 20 aa Linear Peptides (PEP20215042037)	44	44	KINKKNNNSIFNGDECGVSP	Erythrocyte membrane protein 1	0
University of Alberta, 4 Antigens, 20 aa Linear Peptides (PEP20215042037)	44	45	INKKNNNSIFNGDECGVSPP	Erythrocyte membrane protein 1	0
University of Alberta, 4 Antigens, 20 aa Linear Peptides (PEP20215042037)	44	46	NKKNNNSIFNGDECGVSPPT	Erythrocyte membrane protein 1	0
University of Alberta, 4 Antigens, 20 aa Linear Peptides (PEP20215042037)	44	47	KKNNNSIFNGDECGVSPPTG	Erythrocyte membrane protein 1	0
University of Alberta, 4 Antigens, 20 aa Linear Peptides (PEP20215042037)	44	48	KNNNSIFNGDECGVSPPTGN	Erythrocyte membrane protein 1	0
University of Alberta, 4 Antigens, 20 aa Linear Peptides (PEP20215042037)	44	49	NNNSIFNGDECGVSPPTGND	Erythrocyte membrane protein 1	0
University of Alberta, 4 Antigens, 20 aa Linear Peptides (PEP20215042037)	44	50	NNSIFNGDECGVSPPTGNDE	Erythrocyte membrane protein 1	0
University of Alberta, 4 Antigens, 20 aa Linear Peptides (PEP20215042037)	44	51	NSIFNGDECGVSPPTGNDED	Erythrocyte membrane protein 1	0
University of Alberta, 4 Antigens, 20 aa Linear Peptides (PEP20215042037)	44	52	SIFNGDECGVSPPTGNDEDQ	Erythrocyte membrane protein 1	0
University of Alberta, 4 Antigens, 20 aa Linear Peptides (PEP20215042037)	44	53	IFNGDECGVSPPTGNDEDQS	Erythrocyte membrane protein 1	0
University of Alberta, 4 Antigens, 20 aa Linear Peptides (PEP20215042037)	44	54	FNGDECGVSPPTGNDEDQSV	Erythrocyte membrane protein 1	0
University of Alberta, 4 Antigens, 20 aa Linear Peptides (PEP20215042037)	44	55	NGDECGVSPPTGNDEDQSVS	Erythrocyte membrane protein 1	0
University of Alberta, 4 Antigens, 20 aa Linear Peptides (PEP20215042037)	44	56	GDECGVSPPTGNDEDQSVSW	Erythrocyte membrane protein 1	0
University of Alberta, 4 Antigens, 20 aa Linear Peptides (PEP20215042037)	44	57	DECGVSPPTGNDEDQSVSWF	Erythrocyte membrane protein 1	0
University of Alberta, 4 Antigens, 20 aa Linear Peptides (PEP20215042037)	44	58	ECGVSPPTGNDEDQSVSWFK	Erythrocyte membrane protein 1	0
University of Alberta, 4 Antigens, 20 aa Linear Peptides (PEP20215042037)	44	59	CGVSPPTGNDEDQSVSWFKE	Erythrocyte membrane protein 1	0
University of Alberta, 4 Antigens, 20 aa Linear Peptides (PEP20215042037)	44	60	GVSPPTGNDEDQSVSWFKEW	Erythrocyte membrane protein 1	0
University of Alberta, 4 Antigens, 20 aa Linear Peptides (PEP20215042037)	44	61	VSPPTGNDEDQSVSWFKEWG	Erythrocyte membrane protein 1	0
University of Alberta, 4 Antigens, 20 aa Linear Peptides (PEP20215042037)	44	62	SPPTGNDEDQSVSWFKEWGE	Erythrocyte membrane protein 1	5
University of Alberta, 4 Antigens, 20 aa Linear Peptides (PEP20215042037)	44	63	PPTGNDEDQSVSWFKEWGEQ	Erythrocyte membrane protein 1	0
University of Alberta, 4 Antigens, 20 aa Linear Peptides (PEP20215042037)	44	64	PTGNDEDQSVSWFKEWGEQF	Erythrocyte membrane protein 1	0
University of Alberta, 4 Antigens, 20 aa Linear Peptides (PEP20215042037)	44	65	TGNDEDQSVSWFKEWGEQFC	Erythrocyte membrane protein 1	0
University of Alberta, 4 Antigens, 20 aa Linear Peptides (PEP20215042037)	44	66	GNDEDQSVSWFKEWGEQFCI	Erythrocyte membrane protein 1	0
University of Alberta, 4 Antigens, 20 aa Linear Peptides (PEP20215042037)	44	67	NDEDQSVSWFKEWGEQFCIE	Erythrocyte membrane protein 1	0
University of Alberta, 4 Antigens, 20 aa Linear Peptides (PEP20215042037)	46	2	DEDQSVSWFKEWGEQFCIER	Erythrocyte membrane protein 1	0
University of Alberta, 4 Antigens, 20 aa Linear Peptides (PEP20215042037)	46	3	EDQSVSWFKEWGEQFCIERL	Erythrocyte membrane protein 1	0
University of Alberta, 4 Antigens, 20 aa Linear Peptides (PEP20215042037)	46	4	DQSVSWFKEWGEQFCIERLR	Erythrocyte membrane protein 1	0
University of Alberta, 4 Antigens, 20 aa Linear Peptides (PEP20215042037)	46	5	QSVSWFKEWGEQFCIERLRY	Erythrocyte membrane protein 1	0
University of Alberta, 4 Antigens, 20 aa Linear Peptides (PEP20215042037)	46	6	SVSWFKEWGEQFCIERLRYE	Erythrocyte membrane protein 1	0
University of Alberta, 4 Antigens, 20 aa Linear Peptides (PEP20215042037)	46	7	VSWFKEWGEQFCIERLRYEQ	Erythrocyte membrane protein 1	0
University of Alberta, 4 Antigens, 20 aa Linear Peptides (PEP20215042037)	46	8	SWFKEWGEQFCIERLRYEQN	Erythrocyte membrane protein 1	0
University of Alberta, 4 Antigens, 20 aa Linear Peptides (PEP20215042037)	46	9	WFKEWGEQFCIERLRYEQNI	Erythrocyte membrane protein 1	0
University of Alberta, 4 Antigens, 20 aa Linear Peptides (PEP20215042037)	46	10	FKEWGEQFCIERLRYEQNIR	Erythrocyte membrane protein 1	0
University of Alberta, 4 Antigens, 20 aa Linear Peptides (PEP20215042037)	46	11	KEWGEQFCIERLRYEQNIRE	Erythrocyte membrane protein 1	0
University of Alberta, 4 Antigens, 20 aa Linear Peptides (PEP20215042037)	46	12	EWGEQFCIERLRYEQNIREA	Erythrocyte membrane protein 1	0
University of Alberta, 4 Antigens, 20 aa Linear Peptides (PEP20215042037)	46	13	WGEQFCIERLRYEQNIREAC	Erythrocyte membrane protein 1	1
University of Alberta, 4 Antigens, 20 aa Linear Peptides (PEP20215042037)	46	14	GEQFCIERLRYEQNIREACT	Erythrocyte membrane protein 1	0
University of Alberta, 4 Antigens, 20 aa Linear Peptides (PEP20215042037)	46	15	EQFCIERLRYEQNIREACTI	Erythrocyte membrane protein 1	0
University of Alberta, 4 Antigens, 20 aa Linear Peptides (PEP20215042037)	46	16	QFCIERLRYEQNIREACTIN	Erythrocyte membrane protein 1	0
University of Alberta, 4 Antigens, 20 aa Linear Peptides (PEP20215042037)	46	17	FCIERLRYEQNIREACTING	Erythrocyte membrane protein 1	2.25
University of Alberta, 4 Antigens, 20 aa Linear Peptides (PEP20215042037)	46	18	CIERLRYEQNIREACTINGK	Erythrocyte membrane protein 1	0
University of Alberta, 4 Antigens, 20 aa Linear Peptides (PEP20215042037)	46	19	IERLRYEQNIREACTINGKN	Erythrocyte membrane protein 1	3.25
University of Alberta, 4 Antigens, 20 aa Linear Peptides (PEP20215042037)	46	20	ERLRYEQNIREACTINGKNE	Erythrocyte membrane protein 1	0
University of Alberta, 4 Antigens, 20 aa Linear Peptides (PEP20215042037)	46	21	RLRYEQNIREACTINGKNEK	Erythrocyte membrane protein 1	0
University of Alberta, 4 Antigens, 20 aa Linear Peptides (PEP20215042037)	46	22	LRYEQNIREACTINGKNEKK	Erythrocyte membrane protein 1	0
University of Alberta, 4 Antigens, 20 aa Linear Peptides (PEP20215042037)	46	23	RYEQNIREACTINGKNEKKC	Erythrocyte membrane protein 1	0
University of Alberta, 4 Antigens, 20 aa Linear Peptides (PEP20215042037)	46	24	YEQNIREACTINGKNEKKCI	Erythrocyte membrane protein 1	0
University of Alberta, 4 Antigens, 20 aa Linear Peptides (PEP20215042037)	46	25	EQNIREACTINGKNEKKCIN	Erythrocyte membrane protein 1	0
University of Alberta, 4 Antigens, 20 aa Linear Peptides (PEP20215042037)	46	26	QNIREACTINGKNEKKCINS	Erythrocyte membrane protein 1	0
University of Alberta, 4 Antigens, 20 aa Linear Peptides (PEP20215042037)	46	27	NIREACTINGKNEKKCINSK	Erythrocyte membrane protein 1	0
University of Alberta, 4 Antigens, 20 aa Linear Peptides (PEP20215042037)	46	28	IREACTINGKNEKKCINSKS	Erythrocyte membrane protein 1	0
University of Alberta, 4 Antigens, 20 aa Linear Peptides (PEP20215042037)	46	29	REACTINGKNEKKCINSKSG	Erythrocyte membrane protein 1	0
University of Alberta, 4 Antigens, 20 aa Linear Peptides (PEP20215042037)	46	30	EACTINGKNEKKCINSKSGQ	Erythrocyte membrane protein 1	0
University of Alberta, 4 Antigens, 20 aa Linear Peptides (PEP20215042037)	46	31	ACTINGKNEKKCINSKSGQG	Erythrocyte membrane protein 1	0
University of Alberta, 4 Antigens, 20 aa Linear Peptides (PEP20215042037)	46	32	CTINGKNEKKCINSKSGQGD	Erythrocyte membrane protein 1	0
University of Alberta, 4 Antigens, 20 aa Linear Peptides (PEP20215042037)	46	33	TINGKNEKKCINSKSGQGDK	Erythrocyte membrane protein 1	0
University of Alberta, 4 Antigens, 20 aa Linear Peptides (PEP20215042037)	46	34	INGKNEKKCINSKSGQGDKI	Erythrocyte membrane protein 1	0
University of Alberta, 4 Antigens, 20 aa Linear Peptides (PEP20215042037)	46	35	NGKNEKKCINSKSGQGDKIQ	Erythrocyte membrane protein 1	0
University of Alberta, 4 Antigens, 20 aa Linear Peptides (PEP20215042037)	46	36	GKNEKKCINSKSGQGDKIQG	Erythrocyte membrane protein 1	0
University of Alberta, 4 Antigens, 20 aa Linear Peptides (PEP20215042037)	46	37	KNEKKCINSKSGQGDKIQGA	Erythrocyte membrane protein 1	0
University of Alberta, 4 Antigens, 20 aa Linear Peptides (PEP20215042037)	46	38	NEKKCINSKSGQGDKIQGAC	Erythrocyte membrane protein 1	0
University of Alberta, 4 Antigens, 20 aa Linear Peptides (PEP20215042037)	46	39	EKKCINSKSGQGDKIQGACK	Erythrocyte membrane protein 1	0
University of Alberta, 4 Antigens, 20 aa Linear Peptides (PEP20215042037)	46	40	KKCINSKSGQGDKIQGACKR	Erythrocyte membrane protein 1	0
University of Alberta, 4 Antigens, 20 aa Linear Peptides (PEP20215042037)	46	41	KCINSKSGQGDKIQGACKRK	Erythrocyte membrane protein 1	0
University of Alberta, 4 Antigens, 20 aa Linear Peptides (PEP20215042037)	46	42	CINSKSGQGDKIQGACKRKC	Erythrocyte membrane protein 1	0
University of Alberta, 4 Antigens, 20 aa Linear Peptides (PEP20215042037)	46	43	INSKSGQGDKIQGACKRKCE	Erythrocyte membrane protein 1	0
University of Alberta, 4 Antigens, 20 aa Linear Peptides (PEP20215042037)	46	44	NSKSGQGDKIQGACKRKCEK	Erythrocyte membrane protein 1	0
University of Alberta, 4 Antigens, 20 aa Linear Peptides (PEP20215042037)	46	45	SKSGQGDKIQGACKRKCEKY	Erythrocyte membrane protein 1	0
University of Alberta, 4 Antigens, 20 aa Linear Peptides (PEP20215042037)	46	46	KSGQGDKIQGACKRKCEKYK	Erythrocyte membrane protein 1	87
University of Alberta, 4 Antigens, 20 aa Linear Peptides (PEP20215042037)	46	47	SGQGDKIQGACKRKCEKYKK	Erythrocyte membrane protein 1	383.75
University of Alberta, 4 Antigens, 20 aa Linear Peptides (PEP20215042037)	46	48	GQGDKIQGACKRKCEKYKKY	Erythrocyte membrane protein 1	433.75
University of Alberta, 4 Antigens, 20 aa Linear Peptides (PEP20215042037)	46	49	QGDKIQGACKRKCEKYKKYI	Erythrocyte membrane protein 1	347.75
University of Alberta, 4 Antigens, 20 aa Linear Peptides (PEP20215042037)	46	50	GDKIQGACKRKCEKYKKYIS	Erythrocyte membrane protein 1	92.5
University of Alberta, 4 Antigens, 20 aa Linear Peptides (PEP20215042037)	46	51	DKIQGACKRKCEKYKKYISE	Erythrocyte membrane protein 1	98
University of Alberta, 4 Antigens, 20 aa Linear Peptides (PEP20215042037)	46	52	KIQGACKRKCEKYKKYISEK	Erythrocyte membrane protein 1	1230.25
University of Alberta, 4 Antigens, 20 aa Linear Peptides (PEP20215042037)	46	53	IQGACKRKCEKYKKYISEKK	Erythrocyte membrane protein 1	14006
University of Alberta, 4 Antigens, 20 aa Linear Peptides (PEP20215042037)	46	54	QGACKRKCEKYKKYISEKKQ	Erythrocyte membrane protein 1	1969.25
University of Alberta, 4 Antigens, 20 aa Linear Peptides (PEP20215042037)	46	55	GACKRKCEKYKKYISEKKQE	Erythrocyte membrane protein 1	196.5
University of Alberta, 4 Antigens, 20 aa Linear Peptides (PEP20215042037)	46	56	ACKRKCEKYKKYISEKKQEW	Erythrocyte membrane protein 1	92
University of Alberta, 4 Antigens, 20 aa Linear Peptides (PEP20215042037)	46	57	CKRKCEKYKKYISEKKQEWD	Erythrocyte membrane protein 1	86
University of Alberta, 4 Antigens, 20 aa Linear Peptides (PEP20215042037)	46	58	KRKCEKYKKYISEKKQEWDK	Erythrocyte membrane protein 1	90
University of Alberta, 4 Antigens, 20 aa Linear Peptides (PEP20215042037)	46	59	RKCEKYKKYISEKKQEWDKQ	Erythrocyte membrane protein 1	0
University of Alberta, 4 Antigens, 20 aa Linear Peptides (PEP20215042037)	46	60	KCEKYKKYISEKKQEWDKQK	Erythrocyte membrane protein 1	90
University of Alberta, 4 Antigens, 20 aa Linear Peptides (PEP20215042037)	46	61	CEKYKKYISEKKQEWDKQKT	Erythrocyte membrane protein 1	87.5
University of Alberta, 4 Antigens, 20 aa Linear Peptides (PEP20215042037)	46	62	EKYKKYISEKKQEWDKQKTK	Erythrocyte membrane protein 1	631.5
University of Alberta, 4 Antigens, 20 aa Linear Peptides (PEP20215042037)	46	63	KYKKYISEKKQEWDKQKTKY	Erythrocyte membrane protein 1	261.25
University of Alberta, 4 Antigens, 20 aa Linear Peptides (PEP20215042037)	46	64	YKKYISEKKQEWDKQKTKYE	Erythrocyte membrane protein 1	0
University of Alberta, 4 Antigens, 20 aa Linear Peptides (PEP20215042037)	46	65	KKYISEKKQEWDKQKTKYEN	Erythrocyte membrane protein 1	0
University of Alberta, 4 Antigens, 20 aa Linear Peptides (PEP20215042037)	46	66	KYISEKKQEWDKQKTKYENK	Erythrocyte membrane protein 1	628.75
University of Alberta, 4 Antigens, 20 aa Linear Peptides (PEP20215042037)	46	67	YISEKKQEWDKQKTKYENKY	Erythrocyte membrane protein 1	83.5
University of Alberta, 4 Antigens, 20 aa Linear Peptides (PEP20215042037)	48	2	ISEKKQEWDKQKTKYENKYV	Erythrocyte membrane protein 1	647.5
University of Alberta, 4 Antigens, 20 aa Linear Peptides (PEP20215042037)	48	3	SEKKQEWDKQKTKYENKYVG	Erythrocyte membrane protein 1	0
University of Alberta, 4 Antigens, 20 aa Linear Peptides (PEP20215042037)	48	4	EKKQEWDKQKTKYENKYVGK	Erythrocyte membrane protein 1	1039.5
University of Alberta, 4 Antigens, 20 aa Linear Peptides (PEP20215042037)	48	5	KKQEWDKQKTKYENKYVGKS	Erythrocyte membrane protein 1	271.5
University of Alberta, 4 Antigens, 20 aa Linear Peptides (PEP20215042037)	48	6	KQEWDKQKTKYENKYVGKSA	Erythrocyte membrane protein 1	2754
University of Alberta, 4 Antigens, 20 aa Linear Peptides (PEP20215042037)	48	7	QEWDKQKTKYENKYVGKSAS	Erythrocyte membrane protein 1	4443
University of Alberta, 4 Antigens, 20 aa Linear Peptides (PEP20215042037)	48	8	EWDKQKTKYENKYVGKSASD	Erythrocyte membrane protein 1	3505
University of Alberta, 4 Antigens, 20 aa Linear Peptides (PEP20215042037)	48	9	WDKQKTKYENKYVGKSASDL	Erythrocyte membrane protein 1	723.5
University of Alberta, 4 Antigens, 20 aa Linear Peptides (PEP20215042037)	48	10	DKQKTKYENKYVGKSASDLL	Erythrocyte membrane protein 1	270.5
University of Alberta, 4 Antigens, 20 aa Linear Peptides (PEP20215042037)	48	11	KQKTKYENKYVGKSASDLLK	Erythrocyte membrane protein 1	4003
University of Alberta, 4 Antigens, 20 aa Linear Peptides (PEP20215042037)	48	12	QKTKYENKYVGKSASDLLKE	Erythrocyte membrane protein 1	49
University of Alberta, 4 Antigens, 20 aa Linear Peptides (PEP20215042037)	48	13	KTKYENKYVGKSASDLLKEN	Erythrocyte membrane protein 1	87
University of Alberta, 4 Antigens, 20 aa Linear Peptides (PEP20215042037)	48	14	TKYENKYVGKSASDLLKENY	Erythrocyte membrane protein 1	0
University of Alberta, 4 Antigens, 20 aa Linear Peptides (PEP20215042037)	48	15	KYENKYVGKSASDLLKENYP	Erythrocyte membrane protein 1	0
University of Alberta, 4 Antigens, 20 aa Linear Peptides (PEP20215042037)	48	16	YENKYVGKSASDLLKENYPE	Erythrocyte membrane protein 1	0
University of Alberta, 4 Antigens, 20 aa Linear Peptides (PEP20215042037)	48	17	ENKYVGKSASDLLKENYPEC	Erythrocyte membrane protein 1	0
University of Alberta, 4 Antigens, 20 aa Linear Peptides (PEP20215042037)	48	18	NKYVGKSASDLLKENYPECI	Erythrocyte membrane protein 1	0
University of Alberta, 4 Antigens, 20 aa Linear Peptides (PEP20215042037)	48	19	KYVGKSASDLLKENYPECIS	Erythrocyte membrane protein 1	0
University of Alberta, 4 Antigens, 20 aa Linear Peptides (PEP20215042037)	48	20	YVGKSASDLLKENYPECISA	Erythrocyte membrane protein 1	0
University of Alberta, 4 Antigens, 20 aa Linear Peptides (PEP20215042037)	48	21	VGKSASDLLKENYPECISAN	Erythrocyte membrane protein 1	0
University of Alberta, 4 Antigens, 20 aa Linear Peptides (PEP20215042037)	48	22	GKSASDLLKENYPECISANF	Erythrocyte membrane protein 1	0
University of Alberta, 4 Antigens, 20 aa Linear Peptides (PEP20215042037)	48	23	KSASDLLKENYPECISANFD	Erythrocyte membrane protein 1	0
University of Alberta, 4 Antigens, 20 aa Linear Peptides (PEP20215042037)	48	24	SASDLLKENYPECISANFDF	Erythrocyte membrane protein 1	0
University of Alberta, 4 Antigens, 20 aa Linear Peptides (PEP20215042037)	48	25	ASDLLKENYPECISANFDFI	Erythrocyte membrane protein 1	0
University of Alberta, 4 Antigens, 20 aa Linear Peptides (PEP20215042037)	48	26	SDLLKENYPECISANFDFIF	Erythrocyte membrane protein 1	0
University of Alberta, 4 Antigens, 20 aa Linear Peptides (PEP20215042037)	48	27	DLLKENYPECISANFDFIFN	Erythrocyte membrane protein 1	0
University of Alberta, 4 Antigens, 20 aa Linear Peptides (PEP20215042037)	48	28	LLKENYPECISANFDFIFND	Erythrocyte membrane protein 1	0
University of Alberta, 4 Antigens, 20 aa Linear Peptides (PEP20215042037)	48	29	LKENYPECISANFDFIFNDN	Erythrocyte membrane protein 1	0
University of Alberta, 4 Antigens, 20 aa Linear Peptides (PEP20215042037)	48	30	KENYPECISANFDFIFNDNI	Erythrocyte membrane protein 1	0
University of Alberta, 4 Antigens, 20 aa Linear Peptides (PEP20215042037)	48	31	ENYPECISANFDFIFNDNIE	Erythrocyte membrane protein 1	0
University of Alberta, 4 Antigens, 20 aa Linear Peptides (PEP20215042037)	48	32	NYPECISANFDFIFNDNIEY	Erythrocyte membrane protein 1	0
University of Alberta, 4 Antigens, 20 aa Linear Peptides (PEP20215042037)	48	33	YPECISANFDFIFNDNIEYK	Erythrocyte membrane protein 1	0
University of Alberta, 4 Antigens, 20 aa Linear Peptides (PEP20215042037)	48	34	PECISANFDFIFNDNIEYKT	Erythrocyte membrane protein 1	0
University of Alberta, 4 Antigens, 20 aa Linear Peptides (PEP20215042037)	48	35	ECISANFDFIFNDNIEYKTY	Erythrocyte membrane protein 1	0
University of Alberta, 4 Antigens, 20 aa Linear Peptides (PEP20215042037)	48	36	CISANFDFIFNDNIEYKTYY	Erythrocyte membrane protein 1	0
University of Alberta, 4 Antigens, 20 aa Linear Peptides (PEP20215042037)	48	37	ISANFDFIFNDNIEYKTYYP	Erythrocyte membrane protein 1	0
University of Alberta, 4 Antigens, 20 aa Linear Peptides (PEP20215042037)	48	38	SANFDFIFNDNIEYKTYYPY	Erythrocyte membrane protein 1	0
University of Alberta, 4 Antigens, 20 aa Linear Peptides (PEP20215042037)	48	39	ANFDFIFNDNIEYKTYYPYG	Erythrocyte membrane protein 1	0
University of Alberta, 4 Antigens, 20 aa Linear Peptides (PEP20215042037)	48	40	NFDFIFNDNIEYKTYYPYGD	Erythrocyte membrane protein 1	0
University of Alberta, 4 Antigens, 20 aa Linear Peptides (PEP20215042037)	48	41	FDFIFNDNIEYKTYYPYGDY	Erythrocyte membrane protein 1	0
University of Alberta, 4 Antigens, 20 aa Linear Peptides (PEP20215042037)	48	42	DFIFNDNIEYKTYYPYGDYS	Erythrocyte membrane protein 1	0
University of Alberta, 4 Antigens, 20 aa Linear Peptides (PEP20215042037)	48	43	FIFNDNIEYKTYYPYGDYSS	Erythrocyte membrane protein 1	0
University of Alberta, 4 Antigens, 20 aa Linear Peptides (PEP20215042037)	48	44	IFNDNIEYKTYYPYGDYSSI	Erythrocyte membrane protein 1	0
University of Alberta, 4 Antigens, 20 aa Linear Peptides (PEP20215042037)	48	45	FNDNIEYKTYYPYGDYSSIC	Erythrocyte membrane protein 1	0
University of Alberta, 4 Antigens, 20 aa Linear Peptides (PEP20215042037)	48	46	NDNIEYKTYYPYGDYSSICS	Erythrocyte membrane protein 1	0
University of Alberta, 4 Antigens, 20 aa Linear Peptides (PEP20215042037)	48	47	DNIEYKTYYPYGDYSSICSC	Erythrocyte membrane protein 1	0
University of Alberta, 4 Antigens, 20 aa Linear Peptides (PEP20215042037)	48	48	NIEYKTYYPYGDYSSICSCE	Erythrocyte membrane protein 1	0
University of Alberta, 4 Antigens, 20 aa Linear Peptides (PEP20215042037)	48	49	IEYKTYYPYGDYSSICSCEQ	Erythrocyte membrane protein 1	0
University of Alberta, 4 Antigens, 20 aa Linear Peptides (PEP20215042037)	48	50	EYKTYYPYGDYSSICSCEQV	Erythrocyte membrane protein 1	0
University of Alberta, 4 Antigens, 20 aa Linear Peptides (PEP20215042037)	48	51	YKTYYPYGDYSSICSCEQVK	Erythrocyte membrane protein 1	0
University of Alberta, 4 Antigens, 20 aa Linear Peptides (PEP20215042037)	48	52	KTYYPYGDYSSICSCEQVKY	Erythrocyte membrane protein 1	0
University of Alberta, 4 Antigens, 20 aa Linear Peptides (PEP20215042037)	48	53	TYYPYGDYSSICSCEQVKYY	Erythrocyte membrane protein 1	0
University of Alberta, 4 Antigens, 20 aa Linear Peptides (PEP20215042037)	48	54	YYPYGDYSSICSCEQVKYYK	Erythrocyte membrane protein 1	0
University of Alberta, 4 Antigens, 20 aa Linear Peptides (PEP20215042037)	48	55	YPYGDYSSICSCEQVKYYKY	Erythrocyte membrane protein 1	0
University of Alberta, 4 Antigens, 20 aa Linear Peptides (PEP20215042037)	48	56	PYGDYSSICSCEQVKYYKYN	Erythrocyte membrane protein 1	0
University of Alberta, 4 Antigens, 20 aa Linear Peptides (PEP20215042037)	48	57	YGDYSSICSCEQVKYYKYNN	Erythrocyte membrane protein 1	0
University of Alberta, 4 Antigens, 20 aa Linear Peptides (PEP20215042037)	48	58	GDYSSICSCEQVKYYKYNNA	Erythrocyte membrane protein 1	0
University of Alberta, 4 Antigens, 20 aa Linear Peptides (PEP20215042037)	48	59	DYSSICSCEQVKYYKYNNAE	Erythrocyte membrane protein 1	0
University of Alberta, 4 Antigens, 20 aa Linear Peptides (PEP20215042037)	48	60	YSSICSCEQVKYYKYNNAEK	Erythrocyte membrane protein 1	0
University of Alberta, 4 Antigens, 20 aa Linear Peptides (PEP20215042037)	48	61	SSICSCEQVKYYKYNNAEKK	Erythrocyte membrane protein 1	80.5
University of Alberta, 4 Antigens, 20 aa Linear Peptides (PEP20215042037)	48	62	SICSCEQVKYYKYNNAEKKN	Erythrocyte membrane protein 1	0
University of Alberta, 4 Antigens, 20 aa Linear Peptides (PEP20215042037)	48	63	ICSCEQVKYYKYNNAEKKNN	Erythrocyte membrane protein 1	0
University of Alberta, 4 Antigens, 20 aa Linear Peptides (PEP20215042037)	48	64	CSCEQVKYYKYNNAEKKNNK	Erythrocyte membrane protein 1	0
University of Alberta, 4 Antigens, 20 aa Linear Peptides (PEP20215042037)	48	65	SCEQVKYYKYNNAEKKNNKS	Erythrocyte membrane protein 1	79.5
University of Alberta, 4 Antigens, 20 aa Linear Peptides (PEP20215042037)	48	66	CEQVKYYKYNNAEKKNNKSL	Erythrocyte membrane protein 1	89.5
University of Alberta, 4 Antigens, 20 aa Linear Peptides (PEP20215042037)	48	67	EQVKYYKYNNAEKKNNKSLC	Erythrocyte membrane protein 1	0
University of Alberta, 4 Antigens, 20 aa Linear Peptides (PEP20215042037)	50	2	QVKYYKYNNAEKKNNKSLCY	Erythrocyte membrane protein 1	0
University of Alberta, 4 Antigens, 20 aa Linear Peptides (PEP20215042037)	50	3	VKYYKYNNAEKKNNKSLCYE	Erythrocyte membrane protein 1	0
University of Alberta, 4 Antigens, 20 aa Linear Peptides (PEP20215042037)	50	4	KYYKYNNAEKKNNKSLCYEK	Erythrocyte membrane protein 1	0
University of Alberta, 4 Antigens, 20 aa Linear Peptides (PEP20215042037)	50	5	YYKYNNAEKKNNKSLCYEKD	Erythrocyte membrane protein 1	0
University of Alberta, 4 Antigens, 20 aa Linear Peptides (PEP20215042037)	50	6	YKYNNAEKKNNKSLCYEKDN	Erythrocyte membrane protein 1	0
University of Alberta, 4 Antigens, 20 aa Linear Peptides (PEP20215042037)	50	7	KYNNAEKKNNKSLCYEKDND	Erythrocyte membrane protein 1	0
University of Alberta, 4 Antigens, 20 aa Linear Peptides (PEP20215042037)	50	8	YNNAEKKNNKSLCYEKDNDM	Erythrocyte membrane protein 1	0
University of Alberta, 4 Antigens, 20 aa Linear Peptides (PEP20215042037)	50	9	NNAEKKNNKSLCYEKDNDMT	Erythrocyte membrane protein 1	0
University of Alberta, 4 Antigens, 20 aa Linear Peptides (PEP20215042037)	50	10	NAEKKNNKSLCYEKDNDMTW	Erythrocyte membrane protein 1	0
University of Alberta, 4 Antigens, 20 aa Linear Peptides (PEP20215042037)	50	11	AEKKNNKSLCYEKDNDMTWS	Erythrocyte membrane protein 1	0
University of Alberta, 4 Antigens, 20 aa Linear Peptides (PEP20215042037)	50	12	EKKNNKSLCYEKDNDMTWSK	Erythrocyte membrane protein 1	0
University of Alberta, 4 Antigens, 20 aa Linear Peptides (PEP20215042037)	50	13	KKNNKSLCYEKDNDMTWSKK	Erythrocyte membrane protein 1	0
University of Alberta, 4 Antigens, 20 aa Linear Peptides (PEP20215042037)	50	14	KNNKSLCYEKDNDMTWSKKY	Erythrocyte membrane protein 1	0
University of Alberta, 4 Antigens, 20 aa Linear Peptides (PEP20215042037)	50	15	NNKSLCYEKDNDMTWSKKYI	Erythrocyte membrane protein 1	0
University of Alberta, 4 Antigens, 20 aa Linear Peptides (PEP20215042037)	50	16	NKSLCYEKDNDMTWSKKYIK	Erythrocyte membrane protein 1	1768.5
University of Alberta, 4 Antigens, 20 aa Linear Peptides (PEP20215042037)	50	17	KSLCYEKDNDMTWSKKYIKK	Erythrocyte membrane protein 1	10561.2
University of Alberta, 4 Antigens, 20 aa Linear Peptides (PEP20215042037)	50	18	SLCYEKDNDMTWSKKYIKKL	Erythrocyte membrane protein 1	3063
University of Alberta, 4 Antigens, 20 aa Linear Peptides (PEP20215042037)	50	19	LCYEKDNDMTWSKKYIKKLE	Erythrocyte membrane protein 1	338.5
University of Alberta, 4 Antigens, 20 aa Linear Peptides (PEP20215042037)	50	20	CYEKDNDMTWSKKYIKKLEN	Erythrocyte membrane protein 1	460.25
University of Alberta, 4 Antigens, 20 aa Linear Peptides (PEP20215042037)	50	21	YEKDNDMTWSKKYIKKLENG	Erythrocyte membrane protein 1	0
University of Alberta, 4 Antigens, 20 aa Linear Peptides (PEP20215042037)	50	22	EKDNDMTWSKKYIKKLENGR	Erythrocyte membrane protein 1	0
University of Alberta, 4 Antigens, 20 aa Linear Peptides (PEP20215042037)	50	23	KDNDMTWSKKYIKKLENGRS	Erythrocyte membrane protein 1	108.5
University of Alberta, 4 Antigens, 20 aa Linear Peptides (PEP20215042037)	50	24	DNDMTWSKKYIKKLENGRSL	Erythrocyte membrane protein 1	0
University of Alberta, 4 Antigens, 20 aa Linear Peptides (PEP20215042037)	50	25	NDMTWSKKYIKKLENGRSLE	Erythrocyte membrane protein 1	0
University of Alberta, 4 Antigens, 20 aa Linear Peptides (PEP20215042037)	50	26	DMTWSKKYIKKLENGRSLEG	Erythrocyte membrane protein 1	0
University of Alberta, 4 Antigens, 20 aa Linear Peptides (PEP20215042037)	50	27	MTWSKKYIKKLENGRSLEGV	Erythrocyte membrane protein 1	0
University of Alberta, 4 Antigens, 20 aa Linear Peptides (PEP20215042037)	50	28	TWSKKYIKKLENGRSLEGVY	Erythrocyte membrane protein 1	0
University of Alberta, 4 Antigens, 20 aa Linear Peptides (PEP20215042037)	50	29	WSKKYIKKLENGRSLEGVYV	Erythrocyte membrane protein 1	0
University of Alberta, 4 Antigens, 20 aa Linear Peptides (PEP20215042037)	50	30	SKKYIKKLENGRSLEGVYVP	Erythrocyte membrane protein 1	0
University of Alberta, 4 Antigens, 20 aa Linear Peptides (PEP20215042037)	50	31	KKYIKKLENGRSLEGVYVPP	Erythrocyte membrane protein 1	0
University of Alberta, 4 Antigens, 20 aa Linear Peptides (PEP20215042037)	50	32	KYIKKLENGRSLEGVYVPPR	Erythrocyte membrane protein 1	0
University of Alberta, 4 Antigens, 20 aa Linear Peptides (PEP20215042037)	50	33	YIKKLENGRSLEGVYVPPRR	Erythrocyte membrane protein 1	0
University of Alberta, 4 Antigens, 20 aa Linear Peptides (PEP20215042037)	50	34	IKKLENGRSLEGVYVPPRRQ	Erythrocyte membrane protein 1	0
University of Alberta, 4 Antigens, 20 aa Linear Peptides (PEP20215042037)	50	35	KKLENGRSLEGVYVPPRRQQ	Erythrocyte membrane protein 1	0
University of Alberta, 4 Antigens, 20 aa Linear Peptides (PEP20215042037)	50	36	KLENGRSLEGVYVPPRRQQL	Erythrocyte membrane protein 1	0
University of Alberta, 4 Antigens, 20 aa Linear Peptides (PEP20215042037)	50	37	LENGRSLEGVYVPPRRQQLC	Erythrocyte membrane protein 1	0
University of Alberta, 4 Antigens, 20 aa Linear Peptides (PEP20215042037)	50	38	ENGRSLEGVYVPPRRQQLCL	Erythrocyte membrane protein 1	0
University of Alberta, 4 Antigens, 20 aa Linear Peptides (PEP20215042037)	50	39	NGRSLEGVYVPPRRQQLCLY	Erythrocyte membrane protein 1	0
University of Alberta, 4 Antigens, 20 aa Linear Peptides (PEP20215042037)	50	40	GRSLEGVYVPPRRQQLCLYE	Erythrocyte membrane protein 1	0
University of Alberta, 4 Antigens, 20 aa Linear Peptides (PEP20215042037)	50	41	RSLEGVYVPPRRQQLCLYEL	Erythrocyte membrane protein 1	0
University of Alberta, 4 Antigens, 20 aa Linear Peptides (PEP20215042037)	50	42	SLEGVYVPPRRQQLCLYELF	Erythrocyte membrane protein 1	0
University of Alberta, 4 Antigens, 20 aa Linear Peptides (PEP20215042037)	50	43	LEGVYVPPRRQQLCLYELFP	Erythrocyte membrane protein 1	0
University of Alberta, 4 Antigens, 20 aa Linear Peptides (PEP20215042037)	50	44	EGVYVPPRRQQLCLYELFPI	Erythrocyte membrane protein 1	0
University of Alberta, 4 Antigens, 20 aa Linear Peptides (PEP20215042037)	50	45	GVYVPPRRQQLCLYELFPII	Erythrocyte membrane protein 1	0
University of Alberta, 4 Antigens, 20 aa Linear Peptides (PEP20215042037)	50	46	VYVPPRRQQLCLYELFPIII	Erythrocyte membrane protein 1	0
University of Alberta, 4 Antigens, 20 aa Linear Peptides (PEP20215042037)	50	47	YVPPRRQQLCLYELFPIIIK	Erythrocyte membrane protein 1	0
University of Alberta, 4 Antigens, 20 aa Linear Peptides (PEP20215042037)	50	48	VPPRRQQLCLYELFPIIIKN	Erythrocyte membrane protein 1	0
University of Alberta, 4 Antigens, 20 aa Linear Peptides (PEP20215042037)	50	49	PPRRQQLCLYELFPIIIKNE	Erythrocyte membrane protein 1	0
University of Alberta, 4 Antigens, 20 aa Linear Peptides (PEP20215042037)	50	50	PRRQQLCLYELFPIIIKNEE	Erythrocyte membrane protein 1	7
University of Alberta, 4 Antigens, 20 aa Linear Peptides (PEP20215042037)	50	51	RRQQLCLYELFPIIIKNEEG	Erythrocyte membrane protein 1	0
University of Alberta, 4 Antigens, 20 aa Linear Peptides (PEP20215042037)	50	52	RQQLCLYELFPIIIKNEEGM	Erythrocyte membrane protein 1	0
University of Alberta, 4 Antigens, 20 aa Linear Peptides (PEP20215042037)	50	53	QQLCLYELFPIIIKNEEGME	Erythrocyte membrane protein 1	0
University of Alberta, 4 Antigens, 20 aa Linear Peptides (PEP20215042037)	50	54	QLCLYELFPIIIKNEEGMEK	Erythrocyte membrane protein 1	0
University of Alberta, 4 Antigens, 20 aa Linear Peptides (PEP20215042037)	50	55	LCLYELFPIIIKNEEGMEKA	Erythrocyte membrane protein 1	0
University of Alberta, 4 Antigens, 20 aa Linear Peptides (PEP20215042037)	50	56	CLYELFPIIIKNEEGMEKAK	Erythrocyte membrane protein 1	2.5
University of Alberta, 4 Antigens, 20 aa Linear Peptides (PEP20215042037)	50	57	LYELFPIIIKNEEGMEKAKE	Erythrocyte membrane protein 1	0
University of Alberta, 4 Antigens, 20 aa Linear Peptides (PEP20215042037)	50	58	YELFPIIIKNEEGMEKAKEE	Erythrocyte membrane protein 1	0
University of Alberta, 4 Antigens, 20 aa Linear Peptides (PEP20215042037)	50	59	ELFPIIIKNEEGMEKAKEEL	Erythrocyte membrane protein 1	0
University of Alberta, 4 Antigens, 20 aa Linear Peptides (PEP20215042037)	50	60	LFPIIIKNEEGMEKAKEELL	Erythrocyte membrane protein 1	0
University of Alberta, 4 Antigens, 20 aa Linear Peptides (PEP20215042037)	50	61	FPIIIKNEEGMEKAKEELLE	Erythrocyte membrane protein 1	0
University of Alberta, 4 Antigens, 20 aa Linear Peptides (PEP20215042037)	50	62	PIIIKNEEGMEKAKEELLET	Erythrocyte membrane protein 1	0
University of Alberta, 4 Antigens, 20 aa Linear Peptides (PEP20215042037)	50	63	IIIKNEEGMEKAKEELLETL	Erythrocyte membrane protein 1	0
University of Alberta, 4 Antigens, 20 aa Linear Peptides (PEP20215042037)	50	64	IIKNEEGMEKAKEELLETLQ	Erythrocyte membrane protein 1	3.5
University of Alberta, 4 Antigens, 20 aa Linear Peptides (PEP20215042037)	50	65	IKNEEGMEKAKEELLETLQI	Erythrocyte membrane protein 1	0
University of Alberta, 4 Antigens, 20 aa Linear Peptides (PEP20215042037)	50	66	KNEEGMEKAKEELLETLQIV	Erythrocyte membrane protein 1	0
University of Alberta, 4 Antigens, 20 aa Linear Peptides (PEP20215042037)	50	67	NEEGMEKAKEELLETLQIVA	Erythrocyte membrane protein 1	0
University of Alberta, 4 Antigens, 20 aa Linear Peptides (PEP20215042037)	52	2	EEGMEKAKEELLETLQIVAE	Erythrocyte membrane protein 1	0
University of Alberta, 4 Antigens, 20 aa Linear Peptides (PEP20215042037)	52	3	EGMEKAKEELLETLQIVAER	Erythrocyte membrane protein 1	0
University of Alberta, 4 Antigens, 20 aa Linear Peptides (PEP20215042037)	52	4	GMEKAKEELLETLQIVAERE	Erythrocyte membrane protein 1	0
University of Alberta, 4 Antigens, 20 aa Linear Peptides (PEP20215042037)	52	5	MEKAKEELLETLQIVAEREA	Erythrocyte membrane protein 1	0
University of Alberta, 4 Antigens, 20 aa Linear Peptides (PEP20215042037)	52	6	EKAKEELLETLQIVAEREAY	Erythrocyte membrane protein 1	0
University of Alberta, 4 Antigens, 20 aa Linear Peptides (PEP20215042037)	52	7	KAKEELLETLQIVAEREAYY	Erythrocyte membrane protein 1	0
University of Alberta, 4 Antigens, 20 aa Linear Peptides (PEP20215042037)	52	8	AKEELLETLQIVAEREAYYL	Erythrocyte membrane protein 1	0
University of Alberta, 4 Antigens, 20 aa Linear Peptides (PEP20215042037)	52	9	KEELLETLQIVAEREAYYLW	Erythrocyte membrane protein 1	1.5
University of Alberta, 4 Antigens, 20 aa Linear Peptides (PEP20215042037)	52	10	EELLETLQIVAEREAYYLWK	Erythrocyte membrane protein 1	0
University of Alberta, 4 Antigens, 20 aa Linear Peptides (PEP20215042037)	52	11	ELLETLQIVAEREAYYLWKQ	Erythrocyte membrane protein 1	0
University of Alberta, 4 Antigens, 20 aa Linear Peptides (PEP20215042037)	52	12	LLETLQIVAEREAYYLWKQY	Erythrocyte membrane protein 1	0
University of Alberta, 4 Antigens, 20 aa Linear Peptides (PEP20215042037)	52	13	LETLQIVAEREAYYLWKQYN	Erythrocyte membrane protein 1	0
University of Alberta, 4 Antigens, 20 aa Linear Peptides (PEP20215042037)	52	14	ETLQIVAEREAYYLWKQYNP	Erythrocyte membrane protein 1	0
University of Alberta, 4 Antigens, 20 aa Linear Peptides (PEP20215042037)	52	15	TLQIVAEREAYYLWKQYNPT	Erythrocyte membrane protein 1	0
University of Alberta, 4 Antigens, 20 aa Linear Peptides (PEP20215042037)	52	16	LQIVAEREAYYLWKQYNPTG	Erythrocyte membrane protein 1	0
University of Alberta, 4 Antigens, 20 aa Linear Peptides (PEP20215042037)	52	17	QIVAEREAYYLWKQYNPTGK	Erythrocyte membrane protein 1	0
University of Alberta, 4 Antigens, 20 aa Linear Peptides (PEP20215042037)	52	18	IVAEREAYYLWKQYNPTGKG	Erythrocyte membrane protein 1	0
University of Alberta, 4 Antigens, 20 aa Linear Peptides (PEP20215042037)	52	19	VAEREAYYLWKQYNPTGKGI	Erythrocyte membrane protein 1	0
University of Alberta, 4 Antigens, 20 aa Linear Peptides (PEP20215042037)	52	20	AEREAYYLWKQYNPTGKGID	Erythrocyte membrane protein 1	0
University of Alberta, 4 Antigens, 20 aa Linear Peptides (PEP20215042037)	52	21	EREAYYLWKQYNPTGKGIDD	Erythrocyte membrane protein 1	0
University of Alberta, 4 Antigens, 20 aa Linear Peptides (PEP20215042037)	52	22	REAYYLWKQYNPTGKGIDDA	Erythrocyte membrane protein 1	0
University of Alberta, 4 Antigens, 20 aa Linear Peptides (PEP20215042037)	52	23	EAYYLWKQYNPTGKGIDDAN	Erythrocyte membrane protein 1	0
University of Alberta, 4 Antigens, 20 aa Linear Peptides (PEP20215042037)	52	24	AYYLWKQYNPTGKGIDDANK	Erythrocyte membrane protein 1	0
University of Alberta, 4 Antigens, 20 aa Linear Peptides (PEP20215042037)	52	25	YYLWKQYNPTGKGIDDANKK	Erythrocyte membrane protein 1	0
University of Alberta, 4 Antigens, 20 aa Linear Peptides (PEP20215042037)	52	26	YLWKQYNPTGKGIDDANKKA	Erythrocyte membrane protein 1	0
University of Alberta, 4 Antigens, 20 aa Linear Peptides (PEP20215042037)	52	27	LWKQYNPTGKGIDDANKKAC	Erythrocyte membrane protein 1	0
University of Alberta, 4 Antigens, 20 aa Linear Peptides (PEP20215042037)	52	28	WKQYNPTGKGIDDANKKACC	Erythrocyte membrane protein 1	0
University of Alberta, 4 Antigens, 20 aa Linear Peptides (PEP20215042037)	52	29	KQYNPTGKGIDDANKKACCA	Erythrocyte membrane protein 1	0
University of Alberta, 4 Antigens, 20 aa Linear Peptides (PEP20215042037)	52	30	QYNPTGKGIDDANKKACCAI	Erythrocyte membrane protein 1	0
University of Alberta, 4 Antigens, 20 aa Linear Peptides (PEP20215042037)	52	31	YNPTGKGIDDANKKACCAIR	Erythrocyte membrane protein 1	0
University of Alberta, 4 Antigens, 20 aa Linear Peptides (PEP20215042037)	52	32	NPTGKGIDDANKKACCAIRG	Erythrocyte membrane protein 1	0
University of Alberta, 4 Antigens, 20 aa Linear Peptides (PEP20215042037)	52	33	PTGKGIDDANKKACCAIRGS	Erythrocyte membrane protein 1	0
University of Alberta, 4 Antigens, 20 aa Linear Peptides (PEP20215042037)	52	34	TGKGIDDANKKACCAIRGSF	Erythrocyte membrane protein 1	0
University of Alberta, 4 Antigens, 20 aa Linear Peptides (PEP20215042037)	52	35	GKGIDDANKKACCAIRGSFY	Erythrocyte membrane protein 1	0
University of Alberta, 4 Antigens, 20 aa Linear Peptides (PEP20215042037)	52	36	KGIDDANKKACCAIRGSFYD	Erythrocyte membrane protein 1	0
University of Alberta, 4 Antigens, 20 aa Linear Peptides (PEP20215042037)	52	37	GIDDANKKACCAIRGSFYDL	Erythrocyte membrane protein 1	0
University of Alberta, 4 Antigens, 20 aa Linear Peptides (PEP20215042037)	52	38	IDDANKKACCAIRGSFYDLE	Erythrocyte membrane protein 1	0
University of Alberta, 4 Antigens, 20 aa Linear Peptides (PEP20215042037)	52	39	DDANKKACCAIRGSFYDLED	Erythrocyte membrane protein 1	0
University of Alberta, 4 Antigens, 20 aa Linear Peptides (PEP20215042037)	52	40	DANKKACCAIRGSFYDLEDI	Erythrocyte membrane protein 1	2.5
University of Alberta, 4 Antigens, 20 aa Linear Peptides (PEP20215042037)	52	41	ANKKACCAIRGSFYDLEDII	Erythrocyte membrane protein 1	0
University of Alberta, 4 Antigens, 20 aa Linear Peptides (PEP20215042037)	52	42	NKKACCAIRGSFYDLEDIIK	Erythrocyte membrane protein 1	0
University of Alberta, 4 Antigens, 20 aa Linear Peptides (PEP20215042037)	52	43	KKACCAIRGSFYDLEDIIKG	Erythrocyte membrane protein 1	0
University of Alberta, 4 Antigens, 20 aa Linear Peptides (PEP20215042037)	52	44	KACCAIRGSFYDLEDIIKGN	Erythrocyte membrane protein 1	0
University of Alberta, 4 Antigens, 20 aa Linear Peptides (PEP20215042037)	52	45	ACCAIRGSFYDLEDIIKGND	Erythrocyte membrane protein 1	0
University of Alberta, 4 Antigens, 20 aa Linear Peptides (PEP20215042037)	52	46	CCAIRGSFYDLEDIIKGNDL	Erythrocyte membrane protein 1	0
University of Alberta, 4 Antigens, 20 aa Linear Peptides (PEP20215042037)	52	47	CAIRGSFYDLEDIIKGNDLV	Erythrocyte membrane protein 1	6.5
University of Alberta, 4 Antigens, 20 aa Linear Peptides (PEP20215042037)	52	48	AIRGSFYDLEDIIKGNDLVH	Erythrocyte membrane protein 1	0
University of Alberta, 4 Antigens, 20 aa Linear Peptides (PEP20215042037)	52	49	IRGSFYDLEDIIKGNDLVHD	Erythrocyte membrane protein 1	0
University of Alberta, 4 Antigens, 20 aa Linear Peptides (PEP20215042037)	52	50	RGSFYDLEDIIKGNDLVHDE	Erythrocyte membrane protein 1	0
University of Alberta, 4 Antigens, 20 aa Linear Peptides (PEP20215042037)	52	51	GSFYDLEDIIKGNDLVHDEY	Erythrocyte membrane protein 1	0
University of Alberta, 4 Antigens, 20 aa Linear Peptides (PEP20215042037)	52	52	SFYDLEDIIKGNDLVHDEYT	Erythrocyte membrane protein 1	0
University of Alberta, 4 Antigens, 20 aa Linear Peptides (PEP20215042037)	52	53	FYDLEDIIKGNDLVHDEYTK	Erythrocyte membrane protein 1	0
University of Alberta, 4 Antigens, 20 aa Linear Peptides (PEP20215042037)	52	54	YDLEDIIKGNDLVHDEYTKY	Erythrocyte membrane protein 1	0
University of Alberta, 4 Antigens, 20 aa Linear Peptides (PEP20215042037)	52	55	DLEDIIKGNDLVHDEYTKYI	Erythrocyte membrane protein 1	0
University of Alberta, 4 Antigens, 20 aa Linear Peptides (PEP20215042037)	52	56	LEDIIKGNDLVHDEYTKYID	Erythrocyte membrane protein 1	0
University of Alberta, 4 Antigens, 20 aa Linear Peptides (PEP20215042037)	52	57	EDIIKGNDLVHDEYTKYIDS	Erythrocyte membrane protein 1	0
University of Alberta, 4 Antigens, 20 aa Linear Peptides (PEP20215042037)	52	58	DIIKGNDLVHDEYTKYIDSK	Erythrocyte membrane protein 1	0
University of Alberta, 4 Antigens, 20 aa Linear Peptides (PEP20215042037)	52	59	IIKGNDLVHDEYTKYIDSKL	Erythrocyte membrane protein 1	0
University of Alberta, 4 Antigens, 20 aa Linear Peptides (PEP20215042037)	52	60	IKGNDLVHDEYTKYIDSKLN	Erythrocyte membrane protein 1	0
University of Alberta, 4 Antigens, 20 aa Linear Peptides (PEP20215042037)	52	61	KGNDLVHDEYTKYIDSKLNE	Erythrocyte membrane protein 1	0
University of Alberta, 4 Antigens, 20 aa Linear Peptides (PEP20215042037)	52	62	GNDLVHDEYTKYIDSKLNEI	Erythrocyte membrane protein 1	0
University of Alberta, 4 Antigens, 20 aa Linear Peptides (PEP20215042037)	52	63	NDLVHDEYTKYIDSKLNEIF	Erythrocyte membrane protein 1	0
University of Alberta, 4 Antigens, 20 aa Linear Peptides (PEP20215042037)	52	64	DLVHDEYTKYIDSKLNEIFG	Erythrocyte membrane protein 1	0
University of Alberta, 4 Antigens, 20 aa Linear Peptides (PEP20215042037)	52	65	LVHDEYTKYIDSKLNEIFGS	Erythrocyte membrane protein 1	3
University of Alberta, 4 Antigens, 20 aa Linear Peptides (PEP20215042037)	52	66	VHDEYTKYIDSKLNEIFGSS	Erythrocyte membrane protein 1	0
University of Alberta, 4 Antigens, 20 aa Linear Peptides (PEP20215042037)	52	67	HDEYTKYIDSKLNEIFGSSD	Erythrocyte membrane protein 1	0
University of Alberta, 4 Antigens, 20 aa Linear Peptides (PEP20215042037)	54	2	DEYTKYIDSKLNEIFGSSDT	Erythrocyte membrane protein 1	0
University of Alberta, 4 Antigens, 20 aa Linear Peptides (PEP20215042037)	54	3	EYTKYIDSKLNEIFGSSDTN	Erythrocyte membrane protein 1	0
University of Alberta, 4 Antigens, 20 aa Linear Peptides (PEP20215042037)	54	4	YTKYIDSKLNEIFGSSDTND	Erythrocyte membrane protein 1	0
University of Alberta, 4 Antigens, 20 aa Linear Peptides (PEP20215042037)	54	5	TKYIDSKLNEIFGSSDTNDI	Erythrocyte membrane protein 1	0
University of Alberta, 4 Antigens, 20 aa Linear Peptides (PEP20215042037)	54	6	KYIDSKLNEIFGSSDTNDID	Erythrocyte membrane protein 1	0
University of Alberta, 4 Antigens, 20 aa Linear Peptides (PEP20215042037)	54	7	YIDSKLNEIFGSSDTNDIDT	Erythrocyte membrane protein 1	0
University of Alberta, 4 Antigens, 20 aa Linear Peptides (PEP20215042037)	54	8	IDSKLNEIFGSSDTNDIDTK	Erythrocyte membrane protein 1	0
University of Alberta, 4 Antigens, 20 aa Linear Peptides (PEP20215042037)	54	9	DSKLNEIFGSSDTNDIDTKR	Erythrocyte membrane protein 1	0
University of Alberta, 4 Antigens, 20 aa Linear Peptides (PEP20215042037)	54	10	SKLNEIFGSSDTNDIDTKRA	Erythrocyte membrane protein 1	0
University of Alberta, 4 Antigens, 20 aa Linear Peptides (PEP20215042037)	54	11	KLNEIFGSSDTNDIDTKRAR	Erythrocyte membrane protein 1	0
University of Alberta, 4 Antigens, 20 aa Linear Peptides (PEP20215042037)	54	12	LNEIFGSSDTNDIDTKRART	Erythrocyte membrane protein 1	0
University of Alberta, 4 Antigens, 20 aa Linear Peptides (PEP20215042037)	54	13	NEIFGSSDTNDIDTKRARTD	Erythrocyte membrane protein 1	0
University of Alberta, 4 Antigens, 20 aa Linear Peptides (PEP20215042037)	54	14	EIFGSSDTNDIDTKRARTDW	Erythrocyte membrane protein 1	0
University of Alberta, 4 Antigens, 20 aa Linear Peptides (PEP20215042037)	54	15	IFGSSDTNDIDTKRARTDWW	Erythrocyte membrane protein 1	104.5
University of Alberta, 4 Antigens, 20 aa Linear Peptides (PEP20215042037)	54	16	FGSSDTNDIDTKRARTDWWE	Erythrocyte membrane protein 1	0
University of Alberta, 4 Antigens, 20 aa Linear Peptides (PEP20215042037)	54	17	GSSDTNDIDTKRARTDWWEN	Erythrocyte membrane protein 1	0
University of Alberta, 4 Antigens, 20 aa Linear Peptides (PEP20215042037)	54	18	SSDTNDIDTKRARTDWWENE	Erythrocyte membrane protein 1	0
University of Alberta, 4 Antigens, 20 aa Linear Peptides (PEP20215042037)	54	19	SDTNDIDTKRARTDWWENET	Erythrocyte membrane protein 1	0
University of Alberta, 4 Antigens, 20 aa Linear Peptides (PEP20215042037)	54	20	DTNDIDTKRARTDWWENETI	Erythrocyte membrane protein 1	0
University of Alberta, 4 Antigens, 20 aa Linear Peptides (PEP20215042037)	54	21	TNDIDTKRARTDWWENETIT	Erythrocyte membrane protein 1	0
University of Alberta, 4 Antigens, 20 aa Linear Peptides (PEP20215042037)	54	22	NDIDTKRARTDWWENETITN	Erythrocyte membrane protein 1	0
University of Alberta, 4 Antigens, 20 aa Linear Peptides (PEP20215042037)	54	23	DIDTKRARTDWWENETITNG	Erythrocyte membrane protein 1	0
University of Alberta, 4 Antigens, 20 aa Linear Peptides (PEP20215042037)	54	24	IDTKRARTDWWENETITNGT	Erythrocyte membrane protein 1	0
University of Alberta, 4 Antigens, 20 aa Linear Peptides (PEP20215042037)	54	25	DTKRARTDWWENETITNGTD	Erythrocyte membrane protein 1	0
University of Alberta, 4 Antigens, 20 aa Linear Peptides (PEP20215042037)	54	26	TKRARTDWWENETITNGTDR	Erythrocyte membrane protein 1	0
University of Alberta, 4 Antigens, 20 aa Linear Peptides (PEP20215042037)	54	27	KRARTDWWENETITNGTDRK	Erythrocyte membrane protein 1	0
University of Alberta, 4 Antigens, 20 aa Linear Peptides (PEP20215042037)	54	28	RARTDWWENETITNGTDRKT	Erythrocyte membrane protein 1	0
University of Alberta, 4 Antigens, 20 aa Linear Peptides (PEP20215042037)	54	29	ARTDWWENETITNGTDRKTI	Erythrocyte membrane protein 1	0
[truncated: 2,849 more rows]

## Sheet: Mapping Summary
Mapping Summary Linear Epitope Mapping (PEP20215042037) - Mouse IgG 3D10
[truncated: 4,595 more rows]

[truncated: 2 more sheets: Raw Data, 10 µg-ml, Calculation]
