# Supplementary material for: A machine learning framework to identify complex physicochemical features of B cell epitopes
Source: Research Square preprint supplement (doi:10.21203/rs.3.rs-6255613/v1), 2025-04-18
Supplement: Supplementary file 5 [file b377e3fc33e9b9eff7332cbb.xlsx]

## Sheet: Peptide Map
Peptide Map PcDBP (PEP20205061690) - Mouse IgG1 Monoclonal Antibody 3D10
Microarray Content:	DBL domain of PcDBP elongated with neutral GSGSGSG linkers at the C- and N-terminus and translated into overlapping peptides
Sample:	Mouse IgG1 monoclonal antibody 3D10
Peptide Length:	20 aa
Peptide Overlap:	19 aa
Number of Peptides:	322
Number of Spots:	644 (peptides printed in duplicate)
HA Controls:	YPYDVPDYAG	78 spots
Mouse mAb 3D10, 1 µg/ml		1	2	3	4	5	6	7	8	9	10	11	12	13	14	15	16	17	18	19	20	21	22	23	24	25	26	27	28	29	30	31	32	33	34	35	36	37	38	39	40	41	42	43	44	45	46	47	48
	YPYDVPDYAG	G	YPYDVPDYAG	G	YPYDVPDYAG	G	YPYDVPDYAG	G	YPYDVPDYAG	G	YPYDVPDYAG	G	YPYDVPDYAG	G	YPYDVPDYAG	G	YPYDVPDYAG	G	YPYDVPDYAG	G	YPYDVPDYAG	G	YPYDVPDYAG	G	YPYDVPDYAG	G	YPYDVPDYAG	G	YPYDVPDYAG	G	YPYDVPDYAG	G	YPYDVPDYAG	G	YPYDVPDYAG	G	YPYDVPDYAG	G	YPYDVPDYAG	G	YPYDVPDYAG	G	YPYDVPDYAG	G	YPYDVPDYAG	G	YPYDVPDYAG	G	YPYDVPDYAG
1	YPYDVPDYAG	GSGSGSGVNYKEYFDKYQIN	SGSGSGVNYKEYFDKYQINE	GSGSGVNYKEYFDKYQINEC	SGSGVNYKEYFDKYQINECK	GSGVNYKEYFDKYQINECKQ	SGVNYKEYFDKYQINECKQK	GVNYKEYFDKYQINECKQKE	VNYKEYFDKYQINECKQKEK	NYKEYFDKYQINECKQKEKT	YKEYFDKYQINECKQKEKTE	KEYFDKYQINECKQKEKTEI	EYFDKYQINECKQKEKTEIH	YFDKYQINECKQKEKTEIHA	FDKYQINECKQKEKTEIHAW	DKYQINECKQKEKTEIHAWV	KYQINECKQKEKTEIHAWVC	YQINECKQKEKTEIHAWVCD	QINECKQKEKTEIHAWVCDE	INECKQKEKTEIHAWVCDEK	NECKQKEKTEIHAWVCDEKK	ECKQKEKTEIHAWVCDEKKQ	CKQKEKTEIHAWVCDEKKQN	KQKEKTEIHAWVCDEKKQNC	QKEKTEIHAWVCDEKKQNCA	KEKTEIHAWVCDEKKQNCAP	EKTEIHAWVCDEKKQNCAPS	KTEIHAWVCDEKKQNCAPSR	TEIHAWVCDEKKQNCAPSRR	EIHAWVCDEKKQNCAPSRRI	IHAWVCDEKKQNCAPSRRIN	HAWVCDEKKQNCAPSRRINL	AWVCDEKKQNCAPSRRINLC	WVCDEKKQNCAPSRRINLCT	VCDEKKQNCAPSRRINLCTN	CDEKKQNCAPSRRINLCTNR	DEKKQNCAPSRRINLCTNRL	EKKQNCAPSRRINLCTNRLE	KKQNCAPSRRINLCTNRLEI	KQNCAPSRRINLCTNRLEII	QNCAPSRRINLCTNRLEIIP	NCAPSRRINLCTNRLEIIPD	CAPSRRINLCTNRLEIIPDK	APSRRINLCTNRLEIIPDKI	PSRRINLCTNRLEIIPDKIE	SRRINLCTNRLEIIPDKIEI	RRINLCTNRLEIIPDKIEIK	RINLCTNRLEIIPDKIEIKD	INLCTNRLEIIPDKIEIKDN
2	G	GSGSGSGVNYKEYFDKYQIN	SGSGSGVNYKEYFDKYQINE	GSGSGVNYKEYFDKYQINEC	SGSGVNYKEYFDKYQINECK	GSGVNYKEYFDKYQINECKQ	SGVNYKEYFDKYQINECKQK	GVNYKEYFDKYQINECKQKE	VNYKEYFDKYQINECKQKEK	NYKEYFDKYQINECKQKEKT	YKEYFDKYQINECKQKEKTE	KEYFDKYQINECKQKEKTEI	EYFDKYQINECKQKEKTEIH	YFDKYQINECKQKEKTEIHA	FDKYQINECKQKEKTEIHAW	DKYQINECKQKEKTEIHAWV	KYQINECKQKEKTEIHAWVC	YQINECKQKEKTEIHAWVCD	QINECKQKEKTEIHAWVCDE	INECKQKEKTEIHAWVCDEK	NECKQKEKTEIHAWVCDEKK	ECKQKEKTEIHAWVCDEKKQ	CKQKEKTEIHAWVCDEKKQN	KQKEKTEIHAWVCDEKKQNC	QKEKTEIHAWVCDEKKQNCA	KEKTEIHAWVCDEKKQNCAP	EKTEIHAWVCDEKKQNCAPS	KTEIHAWVCDEKKQNCAPSR	TEIHAWVCDEKKQNCAPSRR	EIHAWVCDEKKQNCAPSRRI	IHAWVCDEKKQNCAPSRRIN	HAWVCDEKKQNCAPSRRINL	AWVCDEKKQNCAPSRRINLC	WVCDEKKQNCAPSRRINLCT	VCDEKKQNCAPSRRINLCTN	CDEKKQNCAPSRRINLCTNR	DEKKQNCAPSRRINLCTNRL	EKKQNCAPSRRINLCTNRLE	KKQNCAPSRRINLCTNRLEI	KQNCAPSRRINLCTNRLEII	QNCAPSRRINLCTNRLEIIP	NCAPSRRINLCTNRLEIIPD	CAPSRRINLCTNRLEIIPDK	APSRRINLCTNRLEIIPDKI	PSRRINLCTNRLEIIPDKIE	SRRINLCTNRLEIIPDKIEI	RRINLCTNRLEIIPDKIEIK	RINLCTNRLEIIPDKIEIKD	INLCTNRLEIIPDKIEIKDN
3	YPYDVPDYAG	NEMKELLMDYFKKFIYEDAA	EMKELLMDYFKKFIYEDAAN	MKELLMDYFKKFIYEDAANE	KELLMDYFKKFIYEDAANEG	ELLMDYFKKFIYEDAANEGK	LLMDYFKKFIYEDAANEGKL	LMDYFKKFIYEDAANEGKLL	MDYFKKFIYEDAANEGKLLL	DYFKKFIYEDAANEGKLLLN	YFKKFIYEDAANEGKLLLNK	FKKFIYEDAANEGKLLLNKY	KKFIYEDAANEGKLLLNKYD	KFIYEDAANEGKLLLNKYDD	FIYEDAANEGKLLLNKYDDK	IYEDAANEGKLLLNKYDDKN	YEDAANEGKLLLNKYDDKNN	EDAANEGKLLLNKYDDKNNN	DAANEGKLLLNKYDDKNNNE	AANEGKLLLNKYDDKNNNEY	ANEGKLLLNKYDDKNNNEYC	NEGKLLLNKYDDKNNNEYCN	EGKLLLNKYDDKNNNEYCND	GKLLLNKYDDKNNNEYCNDM	KLLLNKYDDKNNNEYCNDMV	LLLNKYDDKNNNEYCNDMVN	LLNKYDDKNNNEYCNDMVNS	LNKYDDKNNNEYCNDMVNSF	NKYDDKNNNEYCNDMVNSFG	KYDDKNNNEYCNDMVNSFGD	YDDKNNNEYCNDMVNSFGDY	DDKNNNEYCNDMVNSFGDYK	DKNNNEYCNDMVNSFGDYKN	KNNNEYCNDMVNSFGDYKNI	NNNEYCNDMVNSFGDYKNIV	NNEYCNDMVNSFGDYKNIVE	NEYCNDMVNSFGDYKNIVEG	EYCNDMVNSFGDYKNIVEGT	YCNDMVNSFGDYKNIVEGTG	CNDMVNSFGDYKNIVEGTGL	NDMVNSFGDYKNIVEGTGLK	DMVNSFGDYKNIVEGTGLKN	MVNSFGDYKNIVEGTGLKNV	VNSFGDYKNIVEGTGLKNVA	NSFGDYKNIVEGTGLKNVAN	SFGDYKNIVEGTGLKNVANE	FGDYKNIVEGTGLKNVANEN	GDYKNIVEGTGLKNVANENL	DYKNIVEGTGLKNVANENLL
4	G	NEMKELLMDYFKKFIYEDAA	EMKELLMDYFKKFIYEDAAN	MKELLMDYFKKFIYEDAANE	KELLMDYFKKFIYEDAANEG	ELLMDYFKKFIYEDAANEGK	LLMDYFKKFIYEDAANEGKL	LMDYFKKFIYEDAANEGKLL	MDYFKKFIYEDAANEGKLLL	DYFKKFIYEDAANEGKLLLN	YFKKFIYEDAANEGKLLLNK	FKKFIYEDAANEGKLLLNKY	KKFIYEDAANEGKLLLNKYD	KFIYEDAANEGKLLLNKYDD	FIYEDAANEGKLLLNKYDDK	IYEDAANEGKLLLNKYDDKN	YEDAANEGKLLLNKYDDKNN	EDAANEGKLLLNKYDDKNNN	DAANEGKLLLNKYDDKNNNE	AANEGKLLLNKYDDKNNNEY	ANEGKLLLNKYDDKNNNEYC	NEGKLLLNKYDDKNNNEYCN	EGKLLLNKYDDKNNNEYCND	GKLLLNKYDDKNNNEYCNDM	KLLLNKYDDKNNNEYCNDMV	LLLNKYDDKNNNEYCNDMVN	LLNKYDDKNNNEYCNDMVNS	LNKYDDKNNNEYCNDMVNSF	NKYDDKNNNEYCNDMVNSFG	KYDDKNNNEYCNDMVNSFGD	YDDKNNNEYCNDMVNSFGDY	DDKNNNEYCNDMVNSFGDYK	DKNNNEYCNDMVNSFGDYKN	KNNNEYCNDMVNSFGDYKNI	NNNEYCNDMVNSFGDYKNIV	NNEYCNDMVNSFGDYKNIVE	NEYCNDMVNSFGDYKNIVEG	EYCNDMVNSFGDYKNIVEGT	YCNDMVNSFGDYKNIVEGTG	CNDMVNSFGDYKNIVEGTGL	NDMVNSFGDYKNIVEGTGLK	DMVNSFGDYKNIVEGTGLKN	MVNSFGDYKNIVEGTGLKNV	VNSFGDYKNIVEGTGLKNVA	NSFGDYKNIVEGTGLKNVAN	SFGDYKNIVEGTGLKNVANE	FGDYKNIVEGTGLKNVANEN	GDYKNIVEGTGLKNVANENL	DYKNIVEGTGLKNVANENLL
5	YPYDVPDYAG	LELKIQNIFGTDDNAKRDRK	ELKIQNIFGTDDNAKRDRKI	LKIQNIFGTDDNAKRDRKIW	KIQNIFGTDDNAKRDRKIWW	IQNIFGTDDNAKRDRKIWWK	QNIFGTDDNAKRDRKIWWKR	NIFGTDDNAKRDRKIWWKRH	IFGTDDNAKRDRKIWWKRHE	FGTDDNAKRDRKIWWKRHEN	GTDDNAKRDRKIWWKRHENI	TDDNAKRDRKIWWKRHENII	DDNAKRDRKIWWKRHENIIW	DNAKRDRKIWWKRHENIIWK	NAKRDRKIWWKRHENIIWKA	AKRDRKIWWKRHENIIWKAM	KRDRKIWWKRHENIIWKAMV	RDRKIWWKRHENIIWKAMVL	DRKIWWKRHENIIWKAMVLG	RKIWWKRHENIIWKAMVLGK	KIWWKRHENIIWKAMVLGKD	IWWKRHENIIWKAMVLGKDF	WWKRHENIIWKAMVLGKDFN	WKRHENIIWKAMVLGKDFNE	KRHENIIWKAMVLGKDFNEA	RHENIIWKAMVLGKDFNEAS	HENIIWKAMVLGKDFNEASN	ENIIWKAMVLGKDFNEASNY	NIIWKAMVLGKDFNEASNYE	IIWKAMVLGKDFNEASNYEN	IWKAMVLGKDFNEASNYENI	WKAMVLGKDFNEASNYENIC	KAMVLGKDFNEASNYENICT	AMVLGKDFNEASNYENICTN	MVLGKDFNEASNYENICTNY	VLGKDFNEASNYENICTNYK	LGKDFNEASNYENICTNYKL	GKDFNEASNYENICTNYKLE	KDFNEASNYENICTNYKLED	DFNEASNYENICTNYKLEDH	FNEASNYENICTNYKLEDHH	NEASNYENICTNYKLEDHHS	EASNYENICTNYKLEDHHSQ	ASNYENICTNYKLEDHHSQI	SNYENICTNYKLEDHHSQIE	NYENICTNYKLEDHHSQIER	YENICTNYKLEDHHSQIERW	ENICTNYKLEDHHSQIERWA	NICTNYKLEDHHSQIERWAR
6	G	LELKIQNIFGTDDNAKRDRK	ELKIQNIFGTDDNAKRDRKI	LKIQNIFGTDDNAKRDRKIW	KIQNIFGTDDNAKRDRKIWW	IQNIFGTDDNAKRDRKIWWK	QNIFGTDDNAKRDRKIWWKR	NIFGTDDNAKRDRKIWWKRH	IFGTDDNAKRDRKIWWKRHE	FGTDDNAKRDRKIWWKRHEN	GTDDNAKRDRKIWWKRHENI	TDDNAKRDRKIWWKRHENII	DDNAKRDRKIWWKRHENIIW	DNAKRDRKIWWKRHENIIWK	NAKRDRKIWWKRHENIIWKA	AKRDRKIWWKRHENIIWKAM	KRDRKIWWKRHENIIWKAMV	RDRKIWWKRHENIIWKAMVL	DRKIWWKRHENIIWKAMVLG	RKIWWKRHENIIWKAMVLGK	KIWWKRHENIIWKAMVLGKD	IWWKRHENIIWKAMVLGKDF	WWKRHENIIWKAMVLGKDFN	WKRHENIIWKAMVLGKDFNE	KRHENIIWKAMVLGKDFNEA	RHENIIWKAMVLGKDFNEAS	HENIIWKAMVLGKDFNEASN	ENIIWKAMVLGKDFNEASNY	NIIWKAMVLGKDFNEASNYE	IIWKAMVLGKDFNEASNYEN	IWKAMVLGKDFNEASNYENI	WKAMVLGKDFNEASNYENIC	KAMVLGKDFNEASNYENICT	AMVLGKDFNEASNYENICTN	MVLGKDFNEASNYENICTNY	VLGKDFNEASNYENICTNYK	LGKDFNEASNYENICTNYKL	GKDFNEASNYENICTNYKLE	KDFNEASNYENICTNYKLED	DFNEASNYENICTNYKLEDH	FNEASNYENICTNYKLEDHH	NEASNYENICTNYKLEDHHS	EASNYENICTNYKLEDHHSQ	ASNYENICTNYKLEDHHSQI	SNYENICTNYKLEDHHSQIE	NYENICTNYKLEDHHSQIER	YENICTNYKLEDHHSQIERW	ENICTNYKLEDHHSQIERWA	NICTNYKLEDHHSQIERWAR
7	YPYDVPDYAG	REWIQEFSVQYFKEANKINN	EWIQEFSVQYFKEANKINNK	WIQEFSVQYFKEANKINNKC	IQEFSVQYFKEANKINNKCI	QEFSVQYFKEANKINNKCIK	EFSVQYFKEANKINNKCIKK	FSVQYFKEANKINNKCIKKS	SVQYFKEANKINNKCIKKSN	VQYFKEANKINNKCIKKSNI	QYFKEANKINNKCIKKSNIF	YFKEANKINNKCIKKSNIFT	FKEANKINNKCIKKSNIFTE	KEANKINNKCIKKSNIFTES	EANKINNKCIKKSNIFTESI	ANKINNKCIKKSNIFTESIC	NKINNKCIKKSNIFTESICT	KINNKCIKKSNIFTESICTD	INNKCIKKSNIFTESICTDN	NNKCIKKSNIFTESICTDNN	NKCIKKSNIFTESICTDNNC	KCIKKSNIFTESICTDNNCK	CIKKSNIFTESICTDNNCKT	IKKSNIFTESICTDNNCKTA	KKSNIFTESICTDNNCKTAC	KSNIFTESICTDNNCKTACN	SNIFTESICTDNNCKTACNA	NIFTESICTDNNCKTACNAY	IFTESICTDNNCKTACNAYE	FTESICTDNNCKTACNAYET	TESICTDNNCKTACNAYETW	ESICTDNNCKTACNAYETWI	SICTDNNCKTACNAYETWIN	ICTDNNCKTACNAYETWINV	CTDNNCKTACNAYETWINVN	TDNNCKTACNAYETWINVNK	DNNCKTACNAYETWINVNKS	NNCKTACNAYETWINVNKSK	NCKTACNAYETWINVNKSKW	CKTACNAYETWINVNKSKWN	KTACNAYETWINVNKSKWNT	TACNAYETWINVNKSKWNTL	ACNAYETWINVNKSKWNTLL	CNAYETWINVNKSKWNTLLK	NAYETWINVNKSKWNTLLKS	AYETWINVNKSKWNTLLKSF	YETWINVNKSKWNTLLKSFA	ETWINVNKSKWNTLLKSFAN	TWINVNKSKWNTLLKSFANF
8	G	REWIQEFSVQYFKEANKINN	EWIQEFSVQYFKEANKINNK	WIQEFSVQYFKEANKINNKC	IQEFSVQYFKEANKINNKCI	QEFSVQYFKEANKINNKCIK	EFSVQYFKEANKINNKCIKK	FSVQYFKEANKINNKCIKKS	SVQYFKEANKINNKCIKKSN	VQYFKEANKINNKCIKKSNI	QYFKEANKINNKCIKKSNIF	YFKEANKINNKCIKKSNIFT	FKEANKINNKCIKKSNIFTE	KEANKINNKCIKKSNIFTES	EANKINNKCIKKSNIFTESI	ANKINNKCIKKSNIFTESIC	NKINNKCIKKSNIFTESICT	KINNKCIKKSNIFTESICTD	INNKCIKKSNIFTESICTDN	NNKCIKKSNIFTESICTDNN	NKCIKKSNIFTESICTDNNC	KCIKKSNIFTESICTDNNCK	CIKKSNIFTESICTDNNCKT	IKKSNIFTESICTDNNCKTA	KKSNIFTESICTDNNCKTAC	KSNIFTESICTDNNCKTACN	SNIFTESICTDNNCKTACNA	NIFTESICTDNNCKTACNAY	IFTESICTDNNCKTACNAYE	FTESICTDNNCKTACNAYET	TESICTDNNCKTACNAYETW	ESICTDNNCKTACNAYETWI	SICTDNNCKTACNAYETWIN	ICTDNNCKTACNAYETWINV	CTDNNCKTACNAYETWINVN	TDNNCKTACNAYETWINVNK	DNNCKTACNAYETWINVNKS	NNCKTACNAYETWINVNKSK	NCKTACNAYETWINVNKSKW	CKTACNAYETWINVNKSKWN	KTACNAYETWINVNKSKWNT	TACNAYETWINVNKSKWNTL	ACNAYETWINVNKSKWNTLL	CNAYETWINVNKSKWNTLLK	NAYETWINVNKSKWNTLLKS	AYETWINVNKSKWNTLLKSF	YETWINVNKSKWNTLLKSFA	ETWINVNKSKWNTLLKSFAN	TWINVNKSKWNTLLKSFANF
9	YPYDVPDYAG	FKTDYFSEETCRDKAYNSLM	KTDYFSEETCRDKAYNSLMI	TDYFSEETCRDKAYNSLMIE	DYFSEETCRDKAYNSLMIEF	YFSEETCRDKAYNSLMIEFK	FSEETCRDKAYNSLMIEFKE	SEETCRDKAYNSLMIEFKEA	EETCRDKAYNSLMIEFKEAY	ETCRDKAYNSLMIEFKEAYE	TCRDKAYNSLMIEFKEAYEV	CRDKAYNSLMIEFKEAYEVN	RDKAYNSLMIEFKEAYEVNF	DKAYNSLMIEFKEAYEVNFE	KAYNSLMIEFKEAYEVNFEN	AYNSLMIEFKEAYEVNFENV	YNSLMIEFKEAYEVNFENVI	NSLMIEFKEAYEVNFENVIN	SLMIEFKEAYEVNFENVINL	LMIEFKEAYEVNFENVINLD	MIEFKEAYEVNFENVINLDD	IEFKEAYEVNFENVINLDDD	EFKEAYEVNFENVINLDDDH	FKEAYEVNFENVINLDDDHY	KEAYEVNFENVINLDDDHYT	EAYEVNFENVINLDDDHYTG	AYEVNFENVINLDDDHYTGL	YEVNFENVINLDDDHYTGLC	EVNFENVINLDDDHYTGLCI	VNFENVINLDDDHYTGLCIC	NFENVINLDDDHYTGLCICS	FENVINLDDDHYTGLCICSS	ENVINLDDDHYTGLCICSST	NVINLDDDHYTGLCICSSTK	VINLDDDHYTGLCICSSTKA	INLDDDHYTGLCICSSTKAN	NLDDDHYTGLCICSSTKANN	LDDDHYTGLCICSSTKANNT	DDDHYTGLCICSSTKANNTV	DDHYTGLCICSSTKANNTVI	DHYTGLCICSSTKANNTVIT	HYTGLCICSSTKANNTVITN	YTGLCICSSTKANNTVITNS	TGLCICSSTKANNTVITNSL	GLCICSSTKANNTVITNSLN	LCICSSTKANNTVITNSLNY	CICSSTKANNTVITNSLNYN	ICSSTKANNTVITNSLNYNH	CSSTKANNTVITNSLNYNHA
10	G	FKTDYFSEETCRDKAYNSLM	KTDYFSEETCRDKAYNSLMI	TDYFSEETCRDKAYNSLMIE	DYFSEETCRDKAYNSLMIEF	YFSEETCRDKAYNSLMIEFK	FSEETCRDKAYNSLMIEFKE	SEETCRDKAYNSLMIEFKEA	EETCRDKAYNSLMIEFKEAY	ETCRDKAYNSLMIEFKEAYE	TCRDKAYNSLMIEFKEAYEV	CRDKAYNSLMIEFKEAYEVN	RDKAYNSLMIEFKEAYEVNF	DKAYNSLMIEFKEAYEVNFE	KAYNSLMIEFKEAYEVNFEN	AYNSLMIEFKEAYEVNFENV	YNSLMIEFKEAYEVNFENVI	NSLMIEFKEAYEVNFENVIN	SLMIEFKEAYEVNFENVINL	LMIEFKEAYEVNFENVINLD	MIEFKEAYEVNFENVINLDD	IEFKEAYEVNFENVINLDDD	EFKEAYEVNFENVINLDDDH	FKEAYEVNFENVINLDDDHY	KEAYEVNFENVINLDDDHYT	EAYEVNFENVINLDDDHYTG	AYEVNFENVINLDDDHYTGL	YEVNFENVINLDDDHYTGLC	EVNFENVINLDDDHYTGLCI	VNFENVINLDDDHYTGLCIC	NFENVINLDDDHYTGLCICS	FENVINLDDDHYTGLCICSS	ENVINLDDDHYTGLCICSST	NVINLDDDHYTGLCICSSTK	VINLDDDHYTGLCICSSTKA	INLDDDHYTGLCICSSTKAN	NLDDDHYTGLCICSSTKANN	LDDDHYTGLCICSSTKANNT	DDDHYTGLCICSSTKANNTV	DDHYTGLCICSSTKANNTVI	DHYTGLCICSSTKANNTVIT	HYTGLCICSSTKANNTVITN	YTGLCICSSTKANNTVITNS	TGLCICSSTKANNTVITNSL	GLCICSSTKANNTVITNSLN	LCICSSTKANNTVITNSLNY	CICSSTKANNTVITNSLNYN	ICSSTKANNTVITNSLNYNH	CSSTKANNTVITNSLNYNHA
	YPYDVPDYAG	G	YPYDVPDYAG	G	YPYDVPDYAG	G	YPYDVPDYAG	G	YPYDVPDYAG	G	YPYDVPDYAG	G	YPYDVPDYAG	G	YPYDVPDYAG	G	YPYDVPDYAG	G	YPYDVPDYAG	G	YPYDVPDYAG	G	YPYDVPDYAG	G	YPYDVPDYAG	G	YPYDVPDYAG	G	YPYDVPDYAG	G	YPYDVPDYAG	G	YPYDVPDYAG	G	YPYDVPDYAG	G	YPYDVPDYAG	G	YPYDVPDYAG	G	YPYDVPDYAG	G	YPYDVPDYAG	G	YPYDVPDYAG	G	YPYDVPDYAG	G	YPYDVPDYAG
Mouse mAb 3D10, 10 µg/ml		1	2	3	4	5	6	7	8	9	10	11	12	13	14	15	16	17	18	19	20	21	22	23	24	25	26	27	28	29	30	31	32	33	34	35	36	37	38	39	40	41	42	43	44	45	46	47	48
	YPYDVPDYAG	G	YPYDVPDYAG	G	YPYDVPDYAG	G	YPYDVPDYAG	G	YPYDVPDYAG	G	YPYDVPDYAG	G	YPYDVPDYAG	G	YPYDVPDYAG	G	YPYDVPDYAG	G	YPYDVPDYAG	G	YPYDVPDYAG	G	YPYDVPDYAG	G	YPYDVPDYAG	G	YPYDVPDYAG	G	YPYDVPDYAG	G	YPYDVPDYAG	G	YPYDVPDYAG	G	YPYDVPDYAG	G	YPYDVPDYAG	G	YPYDVPDYAG	G	YPYDVPDYAG	G	YPYDVPDYAG	G	YPYDVPDYAG	G	YPYDVPDYAG	G	YPYDVPDYAG
1	YPYDVPDYAG	GSGSGSGVNYKEYFDKYQIN	SGSGSGVNYKEYFDKYQINE	GSGSGVNYKEYFDKYQINEC	SGSGVNYKEYFDKYQINECK	GSGVNYKEYFDKYQINECKQ	SGVNYKEYFDKYQINECKQK	GVNYKEYFDKYQINECKQKE	VNYKEYFDKYQINECKQKEK	NYKEYFDKYQINECKQKEKT	YKEYFDKYQINECKQKEKTE	KEYFDKYQINECKQKEKTEI	EYFDKYQINECKQKEKTEIH	YFDKYQINECKQKEKTEIHA	FDKYQINECKQKEKTEIHAW	DKYQINECKQKEKTEIHAWV	KYQINECKQKEKTEIHAWVC	YQINECKQKEKTEIHAWVCD	QINECKQKEKTEIHAWVCDE	INECKQKEKTEIHAWVCDEK	NECKQKEKTEIHAWVCDEKK	ECKQKEKTEIHAWVCDEKKQ	CKQKEKTEIHAWVCDEKKQN	KQKEKTEIHAWVCDEKKQNC	QKEKTEIHAWVCDEKKQNCA	KEKTEIHAWVCDEKKQNCAP	EKTEIHAWVCDEKKQNCAPS	KTEIHAWVCDEKKQNCAPSR	TEIHAWVCDEKKQNCAPSRR	EIHAWVCDEKKQNCAPSRRI	IHAWVCDEKKQNCAPSRRIN	HAWVCDEKKQNCAPSRRINL	AWVCDEKKQNCAPSRRINLC	WVCDEKKQNCAPSRRINLCT	VCDEKKQNCAPSRRINLCTN	CDEKKQNCAPSRRINLCTNR	DEKKQNCAPSRRINLCTNRL	EKKQNCAPSRRINLCTNRLE	KKQNCAPSRRINLCTNRLEI	KQNCAPSRRINLCTNRLEII	QNCAPSRRINLCTNRLEIIP	NCAPSRRINLCTNRLEIIPD	CAPSRRINLCTNRLEIIPDK	APSRRINLCTNRLEIIPDKI	PSRRINLCTNRLEIIPDKIE	SRRINLCTNRLEIIPDKIEI	RRINLCTNRLEIIPDKIEIK	RINLCTNRLEIIPDKIEIKD	INLCTNRLEIIPDKIEIKDN
2	G	GSGSGSGVNYKEYFDKYQIN	SGSGSGVNYKEYFDKYQINE	GSGSGVNYKEYFDKYQINEC	SGSGVNYKEYFDKYQINECK	GSGVNYKEYFDKYQINECKQ	SGVNYKEYFDKYQINECKQK	GVNYKEYFDKYQINECKQKE	VNYKEYFDKYQINECKQKEK	NYKEYFDKYQINECKQKEKT	YKEYFDKYQINECKQKEKTE	KEYFDKYQINECKQKEKTEI	EYFDKYQINECKQKEKTEIH	YFDKYQINECKQKEKTEIHA	FDKYQINECKQKEKTEIHAW	DKYQINECKQKEKTEIHAWV	KYQINECKQKEKTEIHAWVC	YQINECKQKEKTEIHAWVCD	QINECKQKEKTEIHAWVCDE	INECKQKEKTEIHAWVCDEK	NECKQKEKTEIHAWVCDEKK	ECKQKEKTEIHAWVCDEKKQ	CKQKEKTEIHAWVCDEKKQN	KQKEKTEIHAWVCDEKKQNC	QKEKTEIHAWVCDEKKQNCA	KEKTEIHAWVCDEKKQNCAP	EKTEIHAWVCDEKKQNCAPS	KTEIHAWVCDEKKQNCAPSR	TEIHAWVCDEKKQNCAPSRR	EIHAWVCDEKKQNCAPSRRI	IHAWVCDEKKQNCAPSRRIN	HAWVCDEKKQNCAPSRRINL	AWVCDEKKQNCAPSRRINLC	WVCDEKKQNCAPSRRINLCT	VCDEKKQNCAPSRRINLCTN	CDEKKQNCAPSRRINLCTNR	DEKKQNCAPSRRINLCTNRL	EKKQNCAPSRRINLCTNRLE	KKQNCAPSRRINLCTNRLEI	KQNCAPSRRINLCTNRLEII	QNCAPSRRINLCTNRLEIIP	NCAPSRRINLCTNRLEIIPD	CAPSRRINLCTNRLEIIPDK	APSRRINLCTNRLEIIPDKI	PSRRINLCTNRLEIIPDKIE	SRRINLCTNRLEIIPDKIEI	RRINLCTNRLEIIPDKIEIK	RINLCTNRLEIIPDKIEIKD	INLCTNRLEIIPDKIEIKDN
3	YPYDVPDYAG	NEMKELLMDYFKKFIYEDAA	EMKELLMDYFKKFIYEDAAN	MKELLMDYFKKFIYEDAANE	KELLMDYFKKFIYEDAANEG	ELLMDYFKKFIYEDAANEGK	LLMDYFKKFIYEDAANEGKL	LMDYFKKFIYEDAANEGKLL	MDYFKKFIYEDAANEGKLLL	DYFKKFIYEDAANEGKLLLN	YFKKFIYEDAANEGKLLLNK	FKKFIYEDAANEGKLLLNKY	KKFIYEDAANEGKLLLNKYD	KFIYEDAANEGKLLLNKYDD	FIYEDAANEGKLLLNKYDDK	IYEDAANEGKLLLNKYDDKN	YEDAANEGKLLLNKYDDKNN	EDAANEGKLLLNKYDDKNNN	DAANEGKLLLNKYDDKNNNE	AANEGKLLLNKYDDKNNNEY	ANEGKLLLNKYDDKNNNEYC	NEGKLLLNKYDDKNNNEYCN	EGKLLLNKYDDKNNNEYCND	GKLLLNKYDDKNNNEYCNDM	KLLLNKYDDKNNNEYCNDMV	LLLNKYDDKNNNEYCNDMVN	LLNKYDDKNNNEYCNDMVNS	LNKYDDKNNNEYCNDMVNSF	NKYDDKNNNEYCNDMVNSFG	KYDDKNNNEYCNDMVNSFGD	YDDKNNNEYCNDMVNSFGDY	DDKNNNEYCNDMVNSFGDYK	DKNNNEYCNDMVNSFGDYKN	KNNNEYCNDMVNSFGDYKNI	NNNEYCNDMVNSFGDYKNIV	NNEYCNDMVNSFGDYKNIVE	NEYCNDMVNSFGDYKNIVEG	EYCNDMVNSFGDYKNIVEGT	YCNDMVNSFGDYKNIVEGTG	CNDMVNSFGDYKNIVEGTGL	NDMVNSFGDYKNIVEGTGLK	DMVNSFGDYKNIVEGTGLKN	MVNSFGDYKNIVEGTGLKNV	VNSFGDYKNIVEGTGLKNVA	NSFGDYKNIVEGTGLKNVAN	SFGDYKNIVEGTGLKNVANE	FGDYKNIVEGTGLKNVANEN	GDYKNIVEGTGLKNVANENL	DYKNIVEGTGLKNVANENLL
4	G	NEMKELLMDYFKKFIYEDAA	EMKELLMDYFKKFIYEDAAN	MKELLMDYFKKFIYEDAANE	KELLMDYFKKFIYEDAANEG	ELLMDYFKKFIYEDAANEGK	LLMDYFKKFIYEDAANEGKL	LMDYFKKFIYEDAANEGKLL	MDYFKKFIYEDAANEGKLLL	DYFKKFIYEDAANEGKLLLN	YFKKFIYEDAANEGKLLLNK	FKKFIYEDAANEGKLLLNKY	KKFIYEDAANEGKLLLNKYD	KFIYEDAANEGKLLLNKYDD	FIYEDAANEGKLLLNKYDDK	IYEDAANEGKLLLNKYDDKN	YEDAANEGKLLLNKYDDKNN	EDAANEGKLLLNKYDDKNNN	DAANEGKLLLNKYDDKNNNE	AANEGKLLLNKYDDKNNNEY	ANEGKLLLNKYDDKNNNEYC	NEGKLLLNKYDDKNNNEYCN	EGKLLLNKYDDKNNNEYCND	GKLLLNKYDDKNNNEYCNDM	KLLLNKYDDKNNNEYCNDMV	LLLNKYDDKNNNEYCNDMVN	LLNKYDDKNNNEYCNDMVNS	LNKYDDKNNNEYCNDMVNSF	NKYDDKNNNEYCNDMVNSFG	KYDDKNNNEYCNDMVNSFGD	YDDKNNNEYCNDMVNSFGDY	DDKNNNEYCNDMVNSFGDYK	DKNNNEYCNDMVNSFGDYKN	KNNNEYCNDMVNSFGDYKNI	NNNEYCNDMVNSFGDYKNIV	NNEYCNDMVNSFGDYKNIVE	NEYCNDMVNSFGDYKNIVEG	EYCNDMVNSFGDYKNIVEGT	YCNDMVNSFGDYKNIVEGTG	CNDMVNSFGDYKNIVEGTGL	NDMVNSFGDYKNIVEGTGLK	DMVNSFGDYKNIVEGTGLKN	MVNSFGDYKNIVEGTGLKNV	VNSFGDYKNIVEGTGLKNVA	NSFGDYKNIVEGTGLKNVAN	SFGDYKNIVEGTGLKNVANE	FGDYKNIVEGTGLKNVANEN	GDYKNIVEGTGLKNVANENL	DYKNIVEGTGLKNVANENLL
5	YPYDVPDYAG	LELKIQNIFGTDDNAKRDRK	ELKIQNIFGTDDNAKRDRKI	LKIQNIFGTDDNAKRDRKIW	KIQNIFGTDDNAKRDRKIWW	IQNIFGTDDNAKRDRKIWWK	QNIFGTDDNAKRDRKIWWKR	NIFGTDDNAKRDRKIWWKRH	IFGTDDNAKRDRKIWWKRHE	FGTDDNAKRDRKIWWKRHEN	GTDDNAKRDRKIWWKRHENI	TDDNAKRDRKIWWKRHENII	DDNAKRDRKIWWKRHENIIW	DNAKRDRKIWWKRHENIIWK	NAKRDRKIWWKRHENIIWKA	AKRDRKIWWKRHENIIWKAM	KRDRKIWWKRHENIIWKAMV	RDRKIWWKRHENIIWKAMVL	DRKIWWKRHENIIWKAMVLG	RKIWWKRHENIIWKAMVLGK	KIWWKRHENIIWKAMVLGKD	IWWKRHENIIWKAMVLGKDF	WWKRHENIIWKAMVLGKDFN	WKRHENIIWKAMVLGKDFNE	KRHENIIWKAMVLGKDFNEA	RHENIIWKAMVLGKDFNEAS	HENIIWKAMVLGKDFNEASN	ENIIWKAMVLGKDFNEASNY	NIIWKAMVLGKDFNEASNYE	IIWKAMVLGKDFNEASNYEN	IWKAMVLGKDFNEASNYENI	WKAMVLGKDFNEASNYENIC	KAMVLGKDFNEASNYENICT	AMVLGKDFNEASNYENICTN	MVLGKDFNEASNYENICTNY	VLGKDFNEASNYENICTNYK	LGKDFNEASNYENICTNYKL	GKDFNEASNYENICTNYKLE	KDFNEASNYENICTNYKLED	DFNEASNYENICTNYKLEDH	FNEASNYENICTNYKLEDHH	NEASNYENICTNYKLEDHHS	EASNYENICTNYKLEDHHSQ	ASNYENICTNYKLEDHHSQI	SNYENICTNYKLEDHHSQIE	NYENICTNYKLEDHHSQIER	YENICTNYKLEDHHSQIERW	ENICTNYKLEDHHSQIERWA	NICTNYKLEDHHSQIERWAR
6	G	LELKIQNIFGTDDNAKRDRK	ELKIQNIFGTDDNAKRDRKI	LKIQNIFGTDDNAKRDRKIW	KIQNIFGTDDNAKRDRKIWW	IQNIFGTDDNAKRDRKIWWK	QNIFGTDDNAKRDRKIWWKR	NIFGTDDNAKRDRKIWWKRH	IFGTDDNAKRDRKIWWKRHE	FGTDDNAKRDRKIWWKRHEN	GTDDNAKRDRKIWWKRHENI	TDDNAKRDRKIWWKRHENII	DDNAKRDRKIWWKRHENIIW	DNAKRDRKIWWKRHENIIWK	NAKRDRKIWWKRHENIIWKA	AKRDRKIWWKRHENIIWKAM	KRDRKIWWKRHENIIWKAMV	RDRKIWWKRHENIIWKAMVL	DRKIWWKRHENIIWKAMVLG	RKIWWKRHENIIWKAMVLGK	KIWWKRHENIIWKAMVLGKD	IWWKRHENIIWKAMVLGKDF	WWKRHENIIWKAMVLGKDFN	WKRHENIIWKAMVLGKDFNE	KRHENIIWKAMVLGKDFNEA	RHENIIWKAMVLGKDFNEAS	HENIIWKAMVLGKDFNEASN	ENIIWKAMVLGKDFNEASNY	NIIWKAMVLGKDFNEASNYE	IIWKAMVLGKDFNEASNYEN	IWKAMVLGKDFNEASNYENI	WKAMVLGKDFNEASNYENIC	KAMVLGKDFNEASNYENICT	AMVLGKDFNEASNYENICTN	MVLGKDFNEASNYENICTNY	VLGKDFNEASNYENICTNYK	LGKDFNEASNYENICTNYKL	GKDFNEASNYENICTNYKLE	KDFNEASNYENICTNYKLED	DFNEASNYENICTNYKLEDH	FNEASNYENICTNYKLEDHH	NEASNYENICTNYKLEDHHS	EASNYENICTNYKLEDHHSQ	ASNYENICTNYKLEDHHSQI	SNYENICTNYKLEDHHSQIE	NYENICTNYKLEDHHSQIER	YENICTNYKLEDHHSQIERW	ENICTNYKLEDHHSQIERWA	NICTNYKLEDHHSQIERWAR
7	YPYDVPDYAG	REWIQEFSVQYFKEANKINN	EWIQEFSVQYFKEANKINNK	WIQEFSVQYFKEANKINNKC	IQEFSVQYFKEANKINNKCI	QEFSVQYFKEANKINNKCIK	EFSVQYFKEANKINNKCIKK	FSVQYFKEANKINNKCIKKS	SVQYFKEANKINNKCIKKSN	VQYFKEANKINNKCIKKSNI	QYFKEANKINNKCIKKSNIF	YFKEANKINNKCIKKSNIFT	FKEANKINNKCIKKSNIFTE	KEANKINNKCIKKSNIFTES	EANKINNKCIKKSNIFTESI	ANKINNKCIKKSNIFTESIC	NKINNKCIKKSNIFTESICT	KINNKCIKKSNIFTESICTD	INNKCIKKSNIFTESICTDN	NNKCIKKSNIFTESICTDNN	NKCIKKSNIFTESICTDNNC	KCIKKSNIFTESICTDNNCK	CIKKSNIFTESICTDNNCKT	IKKSNIFTESICTDNNCKTA	KKSNIFTESICTDNNCKTAC	KSNIFTESICTDNNCKTACN	SNIFTESICTDNNCKTACNA	NIFTESICTDNNCKTACNAY	IFTESICTDNNCKTACNAYE	FTESICTDNNCKTACNAYET	TESICTDNNCKTACNAYETW	ESICTDNNCKTACNAYETWI	SICTDNNCKTACNAYETWIN	ICTDNNCKTACNAYETWINV	CTDNNCKTACNAYETWINVN	TDNNCKTACNAYETWINVNK	DNNCKTACNAYETWINVNKS	NNCKTACNAYETWINVNKSK	NCKTACNAYETWINVNKSKW	CKTACNAYETWINVNKSKWN	KTACNAYETWINVNKSKWNT	TACNAYETWINVNKSKWNTL	ACNAYETWINVNKSKWNTLL	CNAYETWINVNKSKWNTLLK	NAYETWINVNKSKWNTLLKS	AYETWINVNKSKWNTLLKSF	YETWINVNKSKWNTLLKSFA	ETWINVNKSKWNTLLKSFAN	TWINVNKSKWNTLLKSFANF
8	G	REWIQEFSVQYFKEANKINN	EWIQEFSVQYFKEANKINNK	WIQEFSVQYFKEANKINNKC	IQEFSVQYFKEANKINNKCI	QEFSVQYFKEANKINNKCIK	EFSVQYFKEANKINNKCIKK	FSVQYFKEANKINNKCIKKS	SVQYFKEANKINNKCIKKSN	VQYFKEANKINNKCIKKSNI	QYFKEANKINNKCIKKSNIF	YFKEANKINNKCIKKSNIFT	FKEANKINNKCIKKSNIFTE	KEANKINNKCIKKSNIFTES	EANKINNKCIKKSNIFTESI	ANKINNKCIKKSNIFTESIC	NKINNKCIKKSNIFTESICT	KINNKCIKKSNIFTESICTD	INNKCIKKSNIFTESICTDN	NNKCIKKSNIFTESICTDNN	NKCIKKSNIFTESICTDNNC	KCIKKSNIFTESICTDNNCK	CIKKSNIFTESICTDNNCKT	IKKSNIFTESICTDNNCKTA	KKSNIFTESICTDNNCKTAC	KSNIFTESICTDNNCKTACN	SNIFTESICTDNNCKTACNA	NIFTESICTDNNCKTACNAY	IFTESICTDNNCKTACNAYE	FTESICTDNNCKTACNAYET	TESICTDNNCKTACNAYETW	ESICTDNNCKTACNAYETWI	SICTDNNCKTACNAYETWIN	ICTDNNCKTACNAYETWINV	CTDNNCKTACNAYETWINVN	TDNNCKTACNAYETWINVNK	DNNCKTACNAYETWINVNKS	NNCKTACNAYETWINVNKSK	NCKTACNAYETWINVNKSKW	CKTACNAYETWINVNKSKWN	KTACNAYETWINVNKSKWNT	TACNAYETWINVNKSKWNTL	ACNAYETWINVNKSKWNTLL	CNAYETWINVNKSKWNTLLK	NAYETWINVNKSKWNTLLKS	AYETWINVNKSKWNTLLKSF	YETWINVNKSKWNTLLKSFA	ETWINVNKSKWNTLLKSFAN	TWINVNKSKWNTLLKSFANF
9	YPYDVPDYAG	FKTDYFSEETCRDKAYNSLM	KTDYFSEETCRDKAYNSLMI	TDYFSEETCRDKAYNSLMIE	DYFSEETCRDKAYNSLMIEF	YFSEETCRDKAYNSLMIEFK	FSEETCRDKAYNSLMIEFKE	SEETCRDKAYNSLMIEFKEA	EETCRDKAYNSLMIEFKEAY	ETCRDKAYNSLMIEFKEAYE	TCRDKAYNSLMIEFKEAYEV	CRDKAYNSLMIEFKEAYEVN	RDKAYNSLMIEFKEAYEVNF	DKAYNSLMIEFKEAYEVNFE	KAYNSLMIEFKEAYEVNFEN	AYNSLMIEFKEAYEVNFENV	YNSLMIEFKEAYEVNFENVI	NSLMIEFKEAYEVNFENVIN	SLMIEFKEAYEVNFENVINL	LMIEFKEAYEVNFENVINLD	MIEFKEAYEVNFENVINLDD	IEFKEAYEVNFENVINLDDD	EFKEAYEVNFENVINLDDDH	FKEAYEVNFENVINLDDDHY	KEAYEVNFENVINLDDDHYT	EAYEVNFENVINLDDDHYTG	AYEVNFENVINLDDDHYTGL	YEVNFENVINLDDDHYTGLC	EVNFENVINLDDDHYTGLCI	VNFENVINLDDDHYTGLCIC	NFENVINLDDDHYTGLCICS	FENVINLDDDHYTGLCICSS	ENVINLDDDHYTGLCICSST	NVINLDDDHYTGLCICSSTK	VINLDDDHYTGLCICSSTKA	INLDDDHYTGLCICSSTKAN	NLDDDHYTGLCICSSTKANN	LDDDHYTGLCICSSTKANNT	DDDHYTGLCICSSTKANNTV	DDHYTGLCICSSTKANNTVI	DHYTGLCICSSTKANNTVIT	HYTGLCICSSTKANNTVITN	YTGLCICSSTKANNTVITNS	TGLCICSSTKANNTVITNSL	GLCICSSTKANNTVITNSLN	LCICSSTKANNTVITNSLNY	CICSSTKANNTVITNSLNYN	ICSSTKANNTVITNSLNYNH	CSSTKANNTVITNSLNYNHA
10	G	FKTDYFSEETCRDKAYNSLM	KTDYFSEETCRDKAYNSLMI	TDYFSEETCRDKAYNSLMIE	DYFSEETCRDKAYNSLMIEF	YFSEETCRDKAYNSLMIEFK	FSEETCRDKAYNSLMIEFKE	SEETCRDKAYNSLMIEFKEA	EETCRDKAYNSLMIEFKEAY	ETCRDKAYNSLMIEFKEAYE	TCRDKAYNSLMIEFKEAYEV	CRDKAYNSLMIEFKEAYEVN	RDKAYNSLMIEFKEAYEVNF	DKAYNSLMIEFKEAYEVNFE	KAYNSLMIEFKEAYEVNFEN	AYNSLMIEFKEAYEVNFENV	YNSLMIEFKEAYEVNFENVI	NSLMIEFKEAYEVNFENVIN	SLMIEFKEAYEVNFENVINL	LMIEFKEAYEVNFENVINLD	MIEFKEAYEVNFENVINLDD	IEFKEAYEVNFENVINLDDD	EFKEAYEVNFENVINLDDDH	FKEAYEVNFENVINLDDDHY	KEAYEVNFENVINLDDDHYT	EAYEVNFENVINLDDDHYTG	AYEVNFENVINLDDDHYTGL	YEVNFENVINLDDDHYTGLC	EVNFENVINLDDDHYTGLCI	VNFENVINLDDDHYTGLCIC	NFENVINLDDDHYTGLCICS	FENVINLDDDHYTGLCICSS	ENVINLDDDHYTGLCICSST	NVINLDDDHYTGLCICSSTK	VINLDDDHYTGLCICSSTKA	INLDDDHYTGLCICSSTKAN	NLDDDHYTGLCICSSTKANN	LDDDHYTGLCICSSTKANNT	DDDHYTGLCICSSTKANNTV	DDHYTGLCICSSTKANNTVI	DHYTGLCICSSTKANNTVIT	HYTGLCICSSTKANNTVITN	YTGLCICSSTKANNTVITNS	TGLCICSSTKANNTVITNSL	GLCICSSTKANNTVITNSLN	LCICSSTKANNTVITNSLNY	CICSSTKANNTVITNSLNYN	ICSSTKANNTVITNSLNYNH	CSSTKANNTVITNSLNYNHA
	YPYDVPDYAG	G	YPYDVPDYAG	G	YPYDVPDYAG	G	YPYDVPDYAG	G	YPYDVPDYAG	G	YPYDVPDYAG	G	YPYDVPDYAG	G	YPYDVPDYAG	G	YPYDVPDYAG	G	YPYDVPDYAG	G	YPYDVPDYAG	G	YPYDVPDYAG	G	YPYDVPDYAG	G	YPYDVPDYAG	G	YPYDVPDYAG	G	YPYDVPDYAG	G	YPYDVPDYAG	G	YPYDVPDYAG	G	YPYDVPDYAG	G	YPYDVPDYAG	G	YPYDVPDYAG	G	YPYDVPDYAG	G	YPYDVPDYAG	G	YPYDVPDYAG	G	YPYDVPDYAG
Mouse mAb 3D10, 100 µg/ml		1	2	3	4	5	6	7	8	9	10	11	12	13	14	15	16	17	18	19	20	21	22	23	24	25	26	27	28	29	30	31	32	33	34	35	36	37	38	39	40	41	42	43	44	45	46	47	48
	YPYDVPDYAG	G	YPYDVPDYAG	G	YPYDVPDYAG	G	YPYDVPDYAG	G	YPYDVPDYAG	G	YPYDVPDYAG	G	YPYDVPDYAG	G	YPYDVPDYAG	G	YPYDVPDYAG	G	YPYDVPDYAG	G	YPYDVPDYAG	G	YPYDVPDYAG	G	YPYDVPDYAG	G	YPYDVPDYAG	G	YPYDVPDYAG	G	YPYDVPDYAG	G	YPYDVPDYAG	G	YPYDVPDYAG	G	YPYDVPDYAG	G	YPYDVPDYAG	G	YPYDVPDYAG	G	YPYDVPDYAG	G	YPYDVPDYAG	G	YPYDVPDYAG	G	YPYDVPDYAG
1	YPYDVPDYAG	GSGSGSGVNYKEYFDKYQIN	SGSGSGVNYKEYFDKYQINE	GSGSGVNYKEYFDKYQINEC	SGSGVNYKEYFDKYQINECK	GSGVNYKEYFDKYQINECKQ	SGVNYKEYFDKYQINECKQK	GVNYKEYFDKYQINECKQKE	VNYKEYFDKYQINECKQKEK	NYKEYFDKYQINECKQKEKT	YKEYFDKYQINECKQKEKTE	KEYFDKYQINECKQKEKTEI	EYFDKYQINECKQKEKTEIH	YFDKYQINECKQKEKTEIHA	FDKYQINECKQKEKTEIHAW	DKYQINECKQKEKTEIHAWV	KYQINECKQKEKTEIHAWVC	YQINECKQKEKTEIHAWVCD	QINECKQKEKTEIHAWVCDE	INECKQKEKTEIHAWVCDEK	NECKQKEKTEIHAWVCDEKK	ECKQKEKTEIHAWVCDEKKQ	CKQKEKTEIHAWVCDEKKQN	KQKEKTEIHAWVCDEKKQNC	QKEKTEIHAWVCDEKKQNCA	KEKTEIHAWVCDEKKQNCAP	EKTEIHAWVCDEKKQNCAPS	KTEIHAWVCDEKKQNCAPSR	TEIHAWVCDEKKQNCAPSRR	EIHAWVCDEKKQNCAPSRRI	IHAWVCDEKKQNCAPSRRIN	HAWVCDEKKQNCAPSRRINL	AWVCDEKKQNCAPSRRINLC	WVCDEKKQNCAPSRRINLCT	VCDEKKQNCAPSRRINLCTN	CDEKKQNCAPSRRINLCTNR	DEKKQNCAPSRRINLCTNRL	EKKQNCAPSRRINLCTNRLE	KKQNCAPSRRINLCTNRLEI	KQNCAPSRRINLCTNRLEII	QNCAPSRRINLCTNRLEIIP	NCAPSRRINLCTNRLEIIPD	CAPSRRINLCTNRLEIIPDK	APSRRINLCTNRLEIIPDKI	PSRRINLCTNRLEIIPDKIE	SRRINLCTNRLEIIPDKIEI	RRINLCTNRLEIIPDKIEIK	RINLCTNRLEIIPDKIEIKD	INLCTNRLEIIPDKIEIKDN
2	G	GSGSGSGVNYKEYFDKYQIN	SGSGSGVNYKEYFDKYQINE	GSGSGVNYKEYFDKYQINEC	SGSGVNYKEYFDKYQINECK	GSGVNYKEYFDKYQINECKQ	SGVNYKEYFDKYQINECKQK	GVNYKEYFDKYQINECKQKE	VNYKEYFDKYQINECKQKEK	NYKEYFDKYQINECKQKEKT	YKEYFDKYQINECKQKEKTE	KEYFDKYQINECKQKEKTEI	EYFDKYQINECKQKEKTEIH	YFDKYQINECKQKEKTEIHA	FDKYQINECKQKEKTEIHAW	DKYQINECKQKEKTEIHAWV	KYQINECKQKEKTEIHAWVC	YQINECKQKEKTEIHAWVCD	QINECKQKEKTEIHAWVCDE	INECKQKEKTEIHAWVCDEK	NECKQKEKTEIHAWVCDEKK	ECKQKEKTEIHAWVCDEKKQ	CKQKEKTEIHAWVCDEKKQN	KQKEKTEIHAWVCDEKKQNC	QKEKTEIHAWVCDEKKQNCA	KEKTEIHAWVCDEKKQNCAP	EKTEIHAWVCDEKKQNCAPS	KTEIHAWVCDEKKQNCAPSR	TEIHAWVCDEKKQNCAPSRR	EIHAWVCDEKKQNCAPSRRI	IHAWVCDEKKQNCAPSRRIN	HAWVCDEKKQNCAPSRRINL	AWVCDEKKQNCAPSRRINLC	WVCDEKKQNCAPSRRINLCT	VCDEKKQNCAPSRRINLCTN	CDEKKQNCAPSRRINLCTNR	DEKKQNCAPSRRINLCTNRL	EKKQNCAPSRRINLCTNRLE	KKQNCAPSRRINLCTNRLEI	KQNCAPSRRINLCTNRLEII	QNCAPSRRINLCTNRLEIIP	NCAPSRRINLCTNRLEIIPD	CAPSRRINLCTNRLEIIPDK	APSRRINLCTNRLEIIPDKI	PSRRINLCTNRLEIIPDKIE	SRRINLCTNRLEIIPDKIEI	RRINLCTNRLEIIPDKIEIK	RINLCTNRLEIIPDKIEIKD	INLCTNRLEIIPDKIEIKDN
3	YPYDVPDYAG	NEMKELLMDYFKKFIYEDAA	EMKELLMDYFKKFIYEDAAN	MKELLMDYFKKFIYEDAANE	KELLMDYFKKFIYEDAANEG	ELLMDYFKKFIYEDAANEGK	LLMDYFKKFIYEDAANEGKL	LMDYFKKFIYEDAANEGKLL	MDYFKKFIYEDAANEGKLLL	DYFKKFIYEDAANEGKLLLN	YFKKFIYEDAANEGKLLLNK	FKKFIYEDAANEGKLLLNKY	KKFIYEDAANEGKLLLNKYD	KFIYEDAANEGKLLLNKYDD	FIYEDAANEGKLLLNKYDDK	IYEDAANEGKLLLNKYDDKN	YEDAANEGKLLLNKYDDKNN	EDAANEGKLLLNKYDDKNNN	DAANEGKLLLNKYDDKNNNE	AANEGKLLLNKYDDKNNNEY	ANEGKLLLNKYDDKNNNEYC	NEGKLLLNKYDDKNNNEYCN	EGKLLLNKYDDKNNNEYCND	GKLLLNKYDDKNNNEYCNDM	KLLLNKYDDKNNNEYCNDMV	LLLNKYDDKNNNEYCNDMVN	LLNKYDDKNNNEYCNDMVNS	LNKYDDKNNNEYCNDMVNSF	NKYDDKNNNEYCNDMVNSFG	KYDDKNNNEYCNDMVNSFGD	YDDKNNNEYCNDMVNSFGDY	DDKNNNEYCNDMVNSFGDYK	DKNNNEYCNDMVNSFGDYKN	KNNNEYCNDMVNSFGDYKNI	NNNEYCNDMVNSFGDYKNIV	NNEYCNDMVNSFGDYKNIVE	NEYCNDMVNSFGDYKNIVEG	EYCNDMVNSFGDYKNIVEGT	YCNDMVNSFGDYKNIVEGTG	CNDMVNSFGDYKNIVEGTGL	NDMVNSFGDYKNIVEGTGLK	DMVNSFGDYKNIVEGTGLKN	MVNSFGDYKNIVEGTGLKNV	VNSFGDYKNIVEGTGLKNVA	NSFGDYKNIVEGTGLKNVAN	SFGDYKNIVEGTGLKNVANE	FGDYKNIVEGTGLKNVANEN	GDYKNIVEGTGLKNVANENL	DYKNIVEGTGLKNVANENLL
4	G	NEMKELLMDYFKKFIYEDAA	EMKELLMDYFKKFIYEDAAN	MKELLMDYFKKFIYEDAANE	KELLMDYFKKFIYEDAANEG	ELLMDYFKKFIYEDAANEGK	LLMDYFKKFIYEDAANEGKL	LMDYFKKFIYEDAANEGKLL	MDYFKKFIYEDAANEGKLLL	DYFKKFIYEDAANEGKLLLN	YFKKFIYEDAANEGKLLLNK	FKKFIYEDAANEGKLLLNKY	KKFIYEDAANEGKLLLNKYD	KFIYEDAANEGKLLLNKYDD	FIYEDAANEGKLLLNKYDDK	IYEDAANEGKLLLNKYDDKN	YEDAANEGKLLLNKYDDKNN	EDAANEGKLLLNKYDDKNNN	DAANEGKLLLNKYDDKNNNE	AANEGKLLLNKYDDKNNNEY	ANEGKLLLNKYDDKNNNEYC	NEGKLLLNKYDDKNNNEYCN	EGKLLLNKYDDKNNNEYCND	GKLLLNKYDDKNNNEYCNDM	KLLLNKYDDKNNNEYCNDMV	LLLNKYDDKNNNEYCNDMVN	LLNKYDDKNNNEYCNDMVNS	LNKYDDKNNNEYCNDMVNSF	NKYDDKNNNEYCNDMVNSFG	KYDDKNNNEYCNDMVNSFGD	YDDKNNNEYCNDMVNSFGDY	DDKNNNEYCNDMVNSFGDYK	DKNNNEYCNDMVNSFGDYKN	KNNNEYCNDMVNSFGDYKNI	NNNEYCNDMVNSFGDYKNIV	NNEYCNDMVNSFGDYKNIVE	NEYCNDMVNSFGDYKNIVEG	EYCNDMVNSFGDYKNIVEGT	YCNDMVNSFGDYKNIVEGTG	CNDMVNSFGDYKNIVEGTGL	NDMVNSFGDYKNIVEGTGLK	DMVNSFGDYKNIVEGTGLKN	MVNSFGDYKNIVEGTGLKNV	VNSFGDYKNIVEGTGLKNVA	NSFGDYKNIVEGTGLKNVAN	SFGDYKNIVEGTGLKNVANE	FGDYKNIVEGTGLKNVANEN	GDYKNIVEGTGLKNVANENL	DYKNIVEGTGLKNVANENLL
5	YPYDVPDYAG	LELKIQNIFGTDDNAKRDRK	ELKIQNIFGTDDNAKRDRKI	LKIQNIFGTDDNAKRDRKIW	KIQNIFGTDDNAKRDRKIWW	IQNIFGTDDNAKRDRKIWWK	QNIFGTDDNAKRDRKIWWKR	NIFGTDDNAKRDRKIWWKRH	IFGTDDNAKRDRKIWWKRHE	FGTDDNAKRDRKIWWKRHEN	GTDDNAKRDRKIWWKRHENI	TDDNAKRDRKIWWKRHENII	DDNAKRDRKIWWKRHENIIW	DNAKRDRKIWWKRHENIIWK	NAKRDRKIWWKRHENIIWKA	AKRDRKIWWKRHENIIWKAM	KRDRKIWWKRHENIIWKAMV	RDRKIWWKRHENIIWKAMVL	DRKIWWKRHENIIWKAMVLG	RKIWWKRHENIIWKAMVLGK	KIWWKRHENIIWKAMVLGKD	IWWKRHENIIWKAMVLGKDF	WWKRHENIIWKAMVLGKDFN	WKRHENIIWKAMVLGKDFNE	KRHENIIWKAMVLGKDFNEA	RHENIIWKAMVLGKDFNEAS	HENIIWKAMVLGKDFNEASN	ENIIWKAMVLGKDFNEASNY	NIIWKAMVLGKDFNEASNYE	IIWKAMVLGKDFNEASNYEN	IWKAMVLGKDFNEASNYENI	WKAMVLGKDFNEASNYENIC	KAMVLGKDFNEASNYENICT	AMVLGKDFNEASNYENICTN	MVLGKDFNEASNYENICTNY	VLGKDFNEASNYENICTNYK	LGKDFNEASNYENICTNYKL	GKDFNEASNYENICTNYKLE	KDFNEASNYENICTNYKLED	DFNEASNYENICTNYKLEDH	FNEASNYENICTNYKLEDHH	NEASNYENICTNYKLEDHHS	EASNYENICTNYKLEDHHSQ	ASNYENICTNYKLEDHHSQI	SNYENICTNYKLEDHHSQIE	NYENICTNYKLEDHHSQIER	YENICTNYKLEDHHSQIERW	ENICTNYKLEDHHSQIERWA	NICTNYKLEDHHSQIERWAR
6	G	LELKIQNIFGTDDNAKRDRK	ELKIQNIFGTDDNAKRDRKI	LKIQNIFGTDDNAKRDRKIW	KIQNIFGTDDNAKRDRKIWW	IQNIFGTDDNAKRDRKIWWK	QNIFGTDDNAKRDRKIWWKR	NIFGTDDNAKRDRKIWWKRH	IFGTDDNAKRDRKIWWKRHE	FGTDDNAKRDRKIWWKRHEN	GTDDNAKRDRKIWWKRHENI	TDDNAKRDRKIWWKRHENII	DDNAKRDRKIWWKRHENIIW	DNAKRDRKIWWKRHENIIWK	NAKRDRKIWWKRHENIIWKA	AKRDRKIWWKRHENIIWKAM	KRDRKIWWKRHENIIWKAMV	RDRKIWWKRHENIIWKAMVL	DRKIWWKRHENIIWKAMVLG	RKIWWKRHENIIWKAMVLGK	KIWWKRHENIIWKAMVLGKD	IWWKRHENIIWKAMVLGKDF	WWKRHENIIWKAMVLGKDFN	WKRHENIIWKAMVLGKDFNE	KRHENIIWKAMVLGKDFNEA	RHENIIWKAMVLGKDFNEAS	HENIIWKAMVLGKDFNEASN	ENIIWKAMVLGKDFNEASNY	NIIWKAMVLGKDFNEASNYE	IIWKAMVLGKDFNEASNYEN	IWKAMVLGKDFNEASNYENI	WKAMVLGKDFNEASNYENIC	KAMVLGKDFNEASNYENICT	AMVLGKDFNEASNYENICTN	MVLGKDFNEASNYENICTNY	VLGKDFNEASNYENICTNYK	LGKDFNEASNYENICTNYKL	GKDFNEASNYENICTNYKLE	KDFNEASNYENICTNYKLED	DFNEASNYENICTNYKLEDH	FNEASNYENICTNYKLEDHH	NEASNYENICTNYKLEDHHS	EASNYENICTNYKLEDHHSQ	ASNYENICTNYKLEDHHSQI	SNYENICTNYKLEDHHSQIE	NYENICTNYKLEDHHSQIER	YENICTNYKLEDHHSQIERW	ENICTNYKLEDHHSQIERWA	NICTNYKLEDHHSQIERWAR
7	YPYDVPDYAG	REWIQEFSVQYFKEANKINN	EWIQEFSVQYFKEANKINNK	WIQEFSVQYFKEANKINNKC	IQEFSVQYFKEANKINNKCI	QEFSVQYFKEANKINNKCIK	EFSVQYFKEANKINNKCIKK	FSVQYFKEANKINNKCIKKS	SVQYFKEANKINNKCIKKSN	VQYFKEANKINNKCIKKSNI	QYFKEANKINNKCIKKSNIF	YFKEANKINNKCIKKSNIFT	FKEANKINNKCIKKSNIFTE	KEANKINNKCIKKSNIFTES	EANKINNKCIKKSNIFTESI	ANKINNKCIKKSNIFTESIC	NKINNKCIKKSNIFTESICT	KINNKCIKKSNIFTESICTD	INNKCIKKSNIFTESICTDN	NNKCIKKSNIFTESICTDNN	NKCIKKSNIFTESICTDNNC	KCIKKSNIFTESICTDNNCK	CIKKSNIFTESICTDNNCKT	IKKSNIFTESICTDNNCKTA	KKSNIFTESICTDNNCKTAC	KSNIFTESICTDNNCKTACN	SNIFTESICTDNNCKTACNA	NIFTESICTDNNCKTACNAY	IFTESICTDNNCKTACNAYE	FTESICTDNNCKTACNAYET	TESICTDNNCKTACNAYETW	ESICTDNNCKTACNAYETWI	SICTDNNCKTACNAYETWIN	ICTDNNCKTACNAYETWINV	CTDNNCKTACNAYETWINVN	TDNNCKTACNAYETWINVNK	DNNCKTACNAYETWINVNKS	NNCKTACNAYETWINVNKSK	NCKTACNAYETWINVNKSKW	CKTACNAYETWINVNKSKWN	KTACNAYETWINVNKSKWNT	TACNAYETWINVNKSKWNTL	ACNAYETWINVNKSKWNTLL	CNAYETWINVNKSKWNTLLK	NAYETWINVNKSKWNTLLKS	AYETWINVNKSKWNTLLKSF	YETWINVNKSKWNTLLKSFA	ETWINVNKSKWNTLLKSFAN	TWINVNKSKWNTLLKSFANF
8	G	REWIQEFSVQYFKEANKINN	EWIQEFSVQYFKEANKINNK	WIQEFSVQYFKEANKINNKC	IQEFSVQYFKEANKINNKCI	QEFSVQYFKEANKINNKCIK	EFSVQYFKEANKINNKCIKK	FSVQYFKEANKINNKCIKKS	SVQYFKEANKINNKCIKKSN	VQYFKEANKINNKCIKKSNI	QYFKEANKINNKCIKKSNIF	YFKEANKINNKCIKKSNIFT	FKEANKINNKCIKKSNIFTE	KEANKINNKCIKKSNIFTES	EANKINNKCIKKSNIFTESI	ANKINNKCIKKSNIFTESIC	NKINNKCIKKSNIFTESICT	KINNKCIKKSNIFTESICTD	INNKCIKKSNIFTESICTDN	NNKCIKKSNIFTESICTDNN	NKCIKKSNIFTESICTDNNC	KCIKKSNIFTESICTDNNCK	CIKKSNIFTESICTDNNCKT	IKKSNIFTESICTDNNCKTA	KKSNIFTESICTDNNCKTAC	KSNIFTESICTDNNCKTACN	SNIFTESICTDNNCKTACNA	NIFTESICTDNNCKTACNAY	IFTESICTDNNCKTACNAYE	FTESICTDNNCKTACNAYET	TESICTDNNCKTACNAYETW	ESICTDNNCKTACNAYETWI	SICTDNNCKTACNAYETWIN	ICTDNNCKTACNAYETWINV	CTDNNCKTACNAYETWINVN	TDNNCKTACNAYETWINVNK	DNNCKTACNAYETWINVNKS	NNCKTACNAYETWINVNKSK	NCKTACNAYETWINVNKSKW	CKTACNAYETWINVNKSKWN	KTACNAYETWINVNKSKWNT	TACNAYETWINVNKSKWNTL	ACNAYETWINVNKSKWNTLL	CNAYETWINVNKSKWNTLLK	NAYETWINVNKSKWNTLLKS	AYETWINVNKSKWNTLLKSF	YETWINVNKSKWNTLLKSFA	ETWINVNKSKWNTLLKSFAN	TWINVNKSKWNTLLKSFANF
9	YPYDVPDYAG	FKTDYFSEETCRDKAYNSLM	KTDYFSEETCRDKAYNSLMI	TDYFSEETCRDKAYNSLMIE	DYFSEETCRDKAYNSLMIEF	YFSEETCRDKAYNSLMIEFK	FSEETCRDKAYNSLMIEFKE	SEETCRDKAYNSLMIEFKEA	EETCRDKAYNSLMIEFKEAY	ETCRDKAYNSLMIEFKEAYE	TCRDKAYNSLMIEFKEAYEV	CRDKAYNSLMIEFKEAYEVN	RDKAYNSLMIEFKEAYEVNF	DKAYNSLMIEFKEAYEVNFE	KAYNSLMIEFKEAYEVNFEN	AYNSLMIEFKEAYEVNFENV	YNSLMIEFKEAYEVNFENVI	NSLMIEFKEAYEVNFENVIN	SLMIEFKEAYEVNFENVINL	LMIEFKEAYEVNFENVINLD	MIEFKEAYEVNFENVINLDD	IEFKEAYEVNFENVINLDDD	EFKEAYEVNFENVINLDDDH	FKEAYEVNFENVINLDDDHY	KEAYEVNFENVINLDDDHYT	EAYEVNFENVINLDDDHYTG	AYEVNFENVINLDDDHYTGL	YEVNFENVINLDDDHYTGLC	EVNFENVINLDDDHYTGLCI	VNFENVINLDDDHYTGLCIC	NFENVINLDDDHYTGLCICS	FENVINLDDDHYTGLCICSS	ENVINLDDDHYTGLCICSST	NVINLDDDHYTGLCICSSTK	VINLDDDHYTGLCICSSTKA	INLDDDHYTGLCICSSTKAN	NLDDDHYTGLCICSSTKANN	LDDDHYTGLCICSSTKANNT	DDDHYTGLCICSSTKANNTV	DDHYTGLCICSSTKANNTVI	DHYTGLCICSSTKANNTVIT	HYTGLCICSSTKANNTVITN	YTGLCICSSTKANNTVITNS	TGLCICSSTKANNTVITNSL	GLCICSSTKANNTVITNSLN	LCICSSTKANNTVITNSLNY	CICSSTKANNTVITNSLNYN	ICSSTKANNTVITNSLNYNH	CSSTKANNTVITNSLNYNHA
10	G	FKTDYFSEETCRDKAYNSLM	KTDYFSEETCRDKAYNSLMI	TDYFSEETCRDKAYNSLMIE	DYFSEETCRDKAYNSLMIEF	YFSEETCRDKAYNSLMIEFK	FSEETCRDKAYNSLMIEFKE	SEETCRDKAYNSLMIEFKEA	EETCRDKAYNSLMIEFKEAY	ETCRDKAYNSLMIEFKEAYE	TCRDKAYNSLMIEFKEAYEV	CRDKAYNSLMIEFKEAYEVN	RDKAYNSLMIEFKEAYEVNF	DKAYNSLMIEFKEAYEVNFE	KAYNSLMIEFKEAYEVNFEN	AYNSLMIEFKEAYEVNFENV	YNSLMIEFKEAYEVNFENVI	NSLMIEFKEAYEVNFENVIN	SLMIEFKEAYEVNFENVINL	LMIEFKEAYEVNFENVINLD	MIEFKEAYEVNFENVINLDD	IEFKEAYEVNFENVINLDDD	EFKEAYEVNFENVINLDDDH	FKEAYEVNFENVINLDDDHY	KEAYEVNFENVINLDDDHYT	EAYEVNFENVINLDDDHYTG	AYEVNFENVINLDDDHYTGL	YEVNFENVINLDDDHYTGLC	EVNFENVINLDDDHYTGLCI	VNFENVINLDDDHYTGLCIC	NFENVINLDDDHYTGLCICS	FENVINLDDDHYTGLCICSS	ENVINLDDDHYTGLCICSST	NVINLDDDHYTGLCICSSTK	VINLDDDHYTGLCICSSTKA	INLDDDHYTGLCICSSTKAN	NLDDDHYTGLCICSSTKANN	LDDDHYTGLCICSSTKANNT	DDDHYTGLCICSSTKANNTV	DDHYTGLCICSSTKANNTVI	DHYTGLCICSSTKANNTVIT	HYTGLCICSSTKANNTVITN	YTGLCICSSTKANNTVITNS	TGLCICSSTKANNTVITNSL	GLCICSSTKANNTVITNSLN	LCICSSTKANNTVITNSLNY	CICSSTKANNTVITNSLNYN	ICSSTKANNTVITNSLNYNH	CSSTKANNTVITNSLNYNHA
	YPYDVPDYAG	G	YPYDVPDYAG	G	YPYDVPDYAG	G	YPYDVPDYAG	G	YPYDVPDYAG	G	YPYDVPDYAG	G	YPYDVPDYAG	G	YPYDVPDYAG	G	YPYDVPDYAG	G	YPYDVPDYAG	G	YPYDVPDYAG	G	YPYDVPDYAG	G	YPYDVPDYAG	G	YPYDVPDYAG	G	YPYDVPDYAG	G	YPYDVPDYAG	G	YPYDVPDYAG	G	YPYDVPDYAG	G	YPYDVPDYAG	G	YPYDVPDYAG	G	YPYDVPDYAG	G	YPYDVPDYAG	G	YPYDVPDYAG	G	YPYDVPDYAG	G	YPYDVPDYAG
	rank binding	peptide source	peptide
	1	chib	XXXXXXXXXXXXX
	2	p6	XXXXXXXXXXXXX
	3	chib	XXXXXXXXXXXXX
	4	p4	XXXXXXXXXXXXXX
	5	chib	XXXXXXXXXXXX
	6	chib	XXXXXXXXXXXXX
	7	chib	XXXXXXXXXXXXX
	8	chib	XXXXXXXXXXXX
	9	chib	XXXXXXXX
	10	chib	XXXXXXXXXXXXXX
[truncated: 19 more columns]

## Sheet: Intensity Map
Intensity Map PcDBP (PEP20205061690) - Mouse IgG1 Monoclonal Antibody 3D10
Microarray Content:	DBL domain of PcDBP elongated with neutral GSGSGSG linkers at the C- and N-terminus and translated into overlapping peptides
Sample:	Mouse IgG1 monoclonal antibody 3D10
Peptide Length:	20 aa
Peptide Overlap:	19 aa
Number of Peptides:	322
Number of Spots:	644 (peptides printed in duplicate)
HA Controls:	YPYDVPDYAG	78 spots
Mouse mAb 3D10, 1 µg/ml		1	2	3	4	5	6	7	8	9	10	11	12	13	14	15	16	17	18	19	20	21	22	23	24	25	26	27	28	29	30	31	32	33	34	35	36	37	38	39	40	41	42	43	44	45	46	47	48
	YPYDVPDYAG	G	YPYDVPDYAG	G	YPYDVPDYAG	G	YPYDVPDYAG	G	YPYDVPDYAG	G	YPYDVPDYAG	G	YPYDVPDYAG	G	YPYDVPDYAG	G	YPYDVPDYAG	G	YPYDVPDYAG	G	YPYDVPDYAG	G	YPYDVPDYAG	G	YPYDVPDYAG	G	YPYDVPDYAG	G	YPYDVPDYAG	G	YPYDVPDYAG	G	YPYDVPDYAG	G	YPYDVPDYAG	G	YPYDVPDYAG	G	YPYDVPDYAG	G	YPYDVPDYAG	G	YPYDVPDYAG	G	YPYDVPDYAG	G	YPYDVPDYAG	G	YPYDVPDYAG
1	YPYDVPDYAG	#REF!	#REF!	#REF!	#REF!	#REF!	#REF!	#REF!	#REF!	#REF!	#REF!	#REF!	#REF!	#REF!	#REF!	#REF!	#REF!	#REF!	#REF!	#REF!	#REF!	#REF!	#REF!	#REF!	#REF!	#REF!	#REF!	#REF!	#REF!	#REF!	#REF!	#REF!	#REF!	#REF!	#REF!	#REF!	#REF!	#REF!	#REF!	#REF!	#REF!	#REF!	#REF!	#REF!	#REF!	#REF!	#REF!	#REF!	#REF!
2	G	#REF!	#REF!	#REF!	#REF!	#REF!	#REF!	#REF!	#REF!	#REF!	#REF!	#REF!	#REF!	#REF!	#REF!	#REF!	#REF!	#REF!	#REF!	#REF!	#REF!	#REF!	#REF!	#REF!	#REF!	#REF!	#REF!	#REF!	#REF!	#REF!	#REF!	#REF!	#REF!	#REF!	#REF!	#REF!	#REF!	#REF!	#REF!	#REF!	#REF!	#REF!	#REF!	#REF!	#REF!	#REF!	#REF!	#REF!	#REF!
3	YPYDVPDYAG	#REF!	#REF!	#REF!	#REF!	#REF!	#REF!	#REF!	#REF!	#REF!	#REF!	#REF!	#REF!	#REF!	#REF!	#REF!	#REF!	#REF!	#REF!	#REF!	#REF!	#REF!	#REF!	#REF!	#REF!	#REF!	#REF!	#REF!	#REF!	#REF!	#REF!	#REF!	#REF!	#REF!	#REF!	#REF!	#REF!	#REF!	#REF!	#REF!	#REF!	#REF!	#REF!	#REF!	#REF!	#REF!	#REF!	#REF!	#REF!
4	G	#REF!	#REF!	#REF!	#REF!	#REF!	#REF!	#REF!	#REF!	#REF!	#REF!	#REF!	#REF!	#REF!	#REF!	#REF!	#REF!	#REF!	#REF!	#REF!	#REF!	#REF!	#REF!	#REF!	#REF!	#REF!	#REF!	#REF!	#REF!	#REF!	#REF!	#REF!	#REF!	#REF!	#REF!	#REF!	#REF!	#REF!	#REF!	#REF!	#REF!	#REF!	#REF!	#REF!	#REF!	#REF!	#REF!	#REF!	#REF!
5	YPYDVPDYAG	#REF!	#REF!	#REF!	#REF!	#REF!	#REF!	#REF!	#REF!	#REF!	#REF!	#REF!	#REF!	#REF!	#REF!	#REF!	#REF!	#REF!	#REF!	#REF!	#REF!	#REF!	#REF!	#REF!	#REF!	#REF!	#REF!	#REF!	#REF!	#REF!	#REF!	#REF!	#REF!	#REF!	#REF!	#REF!	#REF!	#REF!	#REF!	#REF!	#REF!	#REF!	#REF!	#REF!	#REF!	#REF!	#REF!	#REF!	#REF!
6	G	#REF!	#REF!	#REF!	#REF!	#REF!	#REF!	#REF!	#REF!	#REF!	#REF!	#REF!	#REF!	#REF!	#REF!	#REF!	#REF!	#REF!	#REF!	#REF!	#REF!	#REF!	#REF!	#REF!	#REF!	#REF!	#REF!	#REF!	#REF!	#REF!	#REF!	#REF!	#REF!	#REF!	#REF!	#REF!	#REF!	#REF!	#REF!	#REF!	#REF!	#REF!	#REF!	#REF!	#REF!	#REF!	#REF!	#REF!	#REF!
7	YPYDVPDYAG	#REF!	#REF!	#REF!	#REF!	#REF!	#REF!	#REF!	#REF!	#REF!	#REF!	#REF!	#REF!	#REF!	#REF!	#REF!	#REF!	#REF!	#REF!	#REF!	#REF!	#REF!	#REF!	#REF!	#REF!	#REF!	#REF!	#REF!	#REF!	#REF!	#REF!	#REF!	#REF!	#REF!	#REF!	#REF!	#REF!	#REF!	#REF!	#REF!	#REF!	#REF!	#REF!	#REF!	#REF!	#REF!	#REF!	#REF!	#REF!
8	G	#REF!	#REF!	#REF!	#REF!	#REF!	#REF!	#REF!	#REF!	#REF!	#REF!	#REF!	#REF!	#REF!	#REF!	#REF!	#REF!	#REF!	#REF!	#REF!	#REF!	#REF!	#REF!	#REF!	#REF!	#REF!	#REF!	#REF!	#REF!	#REF!	#REF!	#REF!	#REF!	#REF!	#REF!	#REF!	#REF!	#REF!	#REF!	#REF!	#REF!	#REF!	#REF!	#REF!	#REF!	#REF!	#REF!	#REF!	#REF!
9	YPYDVPDYAG	#REF!	#REF!	#REF!	#REF!	#REF!	#REF!	#REF!	#REF!	#REF!	#REF!	#REF!	#REF!	#REF!	#REF!	#REF!	#REF!	#REF!	#REF!	#REF!	#REF!	#REF!	#REF!	#REF!	#REF!	#REF!	#REF!	#REF!	#REF!	#REF!	#REF!	#REF!	#REF!	#REF!	#REF!	#REF!	#REF!	#REF!	#REF!	#REF!	#REF!	#REF!	#REF!	#REF!	#REF!	#REF!	#REF!	#REF!	#REF!
10	G	#REF!	#REF!	#REF!	#REF!	#REF!	#REF!	#REF!	#REF!	#REF!	#REF!	#REF!	#REF!	#REF!	#REF!	#REF!	#REF!	#REF!	#REF!	#REF!	#REF!	#REF!	#REF!	#REF!	#REF!	#REF!	#REF!	#REF!	#REF!	#REF!	#REF!	#REF!	#REF!	#REF!	#REF!	#REF!	#REF!	#REF!	#REF!	#REF!	#REF!	#REF!	#REF!	#REF!	#REF!	#REF!	#REF!	#REF!	#REF!
	YPYDVPDYAG	G	YPYDVPDYAG	G	YPYDVPDYAG	G	YPYDVPDYAG	G	YPYDVPDYAG	G	YPYDVPDYAG	G	YPYDVPDYAG	G	YPYDVPDYAG	G	YPYDVPDYAG	G	YPYDVPDYAG	G	YPYDVPDYAG	G	YPYDVPDYAG	G	YPYDVPDYAG	G	YPYDVPDYAG	G	YPYDVPDYAG	G	YPYDVPDYAG	G	YPYDVPDYAG	G	YPYDVPDYAG	G	YPYDVPDYAG	G	YPYDVPDYAG	G	YPYDVPDYAG	G	YPYDVPDYAG	G	YPYDVPDYAG	G	YPYDVPDYAG	G	YPYDVPDYAG
Mouse mAb 3D10, 10 µg/ml		1	2	3	4	5	6	7	8	9	10	11	12	13	14	15	16	17	18	19	20	21	22	23	24	25	26	27	28	29	30	31	32	33	34	35	36	37	38	39	40	41	42	43	44	45	46	47	48
	YPYDVPDYAG	G	YPYDVPDYAG	G	YPYDVPDYAG	G	YPYDVPDYAG	G	YPYDVPDYAG	G	YPYDVPDYAG	G	YPYDVPDYAG	G	YPYDVPDYAG	G	YPYDVPDYAG	G	YPYDVPDYAG	G	YPYDVPDYAG	G	YPYDVPDYAG	G	YPYDVPDYAG	G	YPYDVPDYAG	G	YPYDVPDYAG	G	YPYDVPDYAG	G	YPYDVPDYAG	G	YPYDVPDYAG	G	YPYDVPDYAG	G	YPYDVPDYAG	G	YPYDVPDYAG	G	YPYDVPDYAG	G	YPYDVPDYAG	G	YPYDVPDYAG	G	YPYDVPDYAG
1	YPYDVPDYAG	25	15	5	12.5	0	24.5	7.75	23	24	0	0	0	0	0	0	0	0	0	0	0	0	0	0	0	0	0	0	0	0	0	0	0	4.5	0	0	7	4	0	0	7.5	0	0	0	2	0	7	0	0
2	G	25	15	5	12.5	0	24.5	7.75	23	24	0	0	0	0	0	0	0	0	0	0	0	0	0	0	0	0	0	0	0	0	0	0	0	4.5	0	0	7	4	0	0	7.5	0	0	0	2	0	7	0	0
3	YPYDVPDYAG	0	3	0	0	0	0	0	0	0	0	0	0	0	20	9.5	0	0	0	0	0	0	0	0	0	0	0	0	5.5	0	0	0	0	6	0	0	0	0	0	0	14	5	0	0	2	0	0	0	0
4	G	0	3	0	0	0	0	0	0	0	0	0	0	0	20	9.5	0	0	0	0	0	0	0	0	0	0	0	0	5.5	0	0	0	0	6	0	0	0	0	0	0	14	5	0	0	2	0	0	0	0
5	YPYDVPDYAG	33.5	379.5	36	16.5	20.5	14	0	0	0	0	0	0	0	0	0	0	0	0	0	0	6	0	0	0	0	0	0	0	0	0	0	8.75	8.5	0	0	18	0	0	2	0	0	0	0	0	13	12.5	0	0
6	G	33.5	379.5	36	16.5	20.5	14	0	0	0	0	0	0	0	0	0	0	0	0	0	0	6	0	0	0	0	0	0	0	0	0	0	8.75	8.5	0	0	18	0	0	2	0	0	0	0	0	13	12.5	0	0
7	YPYDVPDYAG	0	0	0	0	0	89.75	204.5	79.5	55.5	0	0	0	0	0	0	0	0	0	0	0	0	2	0	0	0	0	0	0	0	0	7	0	0	0	0	0	8.5	0	4.5	0	14.5	14	8.25	14.5	0	0	0	0
8	G	0	0	0	0	0	89.75	204.5	79.5	55.5	0	0	0	0	0	0	0	0	0	0	0	0	2	0	0	0	0	0	0	0	0	7	0	0	0	0	0	8.5	0	4.5	0	14.5	14	8.25	14.5	0	0	0	0
9	YPYDVPDYAG	0	0	0	0	0	0	0	0	0	0	0	0	0	0	0	0	0	0	0	0	0	0	0	0	0	0	0	0	0	0	0	0	0	2.5	0	0	0	0	0	0	3	0	0	0	0	0	12.5	0
10	G	0	0	0	0	0	0	0	0	0	0	0	0	0	0	0	0	0	0	0	0	0	0	0	0	0	0	0	0	0	0	0	0	0	2.5	0	0	0	0	0	0	3	0	0	0	0	0	12.5	0
	YPYDVPDYAG	G	YPYDVPDYAG	G	YPYDVPDYAG	G	YPYDVPDYAG	G	YPYDVPDYAG	G	YPYDVPDYAG	G	YPYDVPDYAG	G	YPYDVPDYAG	G	YPYDVPDYAG	G	YPYDVPDYAG	G	YPYDVPDYAG	G	YPYDVPDYAG	G	YPYDVPDYAG	G	YPYDVPDYAG	G	YPYDVPDYAG	G	YPYDVPDYAG	G	YPYDVPDYAG	G	YPYDVPDYAG	G	YPYDVPDYAG	G	YPYDVPDYAG	G	YPYDVPDYAG	G	YPYDVPDYAG	G	YPYDVPDYAG	G	YPYDVPDYAG	G	YPYDVPDYAG
Mouse mAb 3D10, 100 µg/ml		1	2	3	4	5	6	7	8	9	10	11	12	13	14	15	16	17	18	19	20	21	22	23	24	25	26	27	28	29	30	31	32	33	34	35	36	37	38	39	40	41	42	43	44	45	46	47	48
	YPYDVPDYAG	G	YPYDVPDYAG	G	YPYDVPDYAG	G	YPYDVPDYAG	G	YPYDVPDYAG	G	YPYDVPDYAG	G	YPYDVPDYAG	G	YPYDVPDYAG	G	YPYDVPDYAG	G	YPYDVPDYAG	G	YPYDVPDYAG	G	YPYDVPDYAG	G	YPYDVPDYAG	G	YPYDVPDYAG	G	YPYDVPDYAG	G	YPYDVPDYAG	G	YPYDVPDYAG	G	YPYDVPDYAG	G	YPYDVPDYAG	G	YPYDVPDYAG	G	YPYDVPDYAG	G	YPYDVPDYAG	G	YPYDVPDYAG	G	YPYDVPDYAG	G	YPYDVPDYAG
1	YPYDVPDYAG	#REF!	#REF!	#REF!	#REF!	#REF!	#REF!	#REF!	#REF!	#REF!	#REF!	#REF!	#REF!	#REF!	#REF!	#REF!	#REF!	#REF!	#REF!	#REF!	#REF!	#REF!	#REF!	#REF!	#REF!	#REF!	#REF!	#REF!	#REF!	#REF!	#REF!	#REF!	#REF!	#REF!	#REF!	#REF!	#REF!	#REF!	#REF!	#REF!	#REF!	#REF!	#REF!	#REF!	#REF!	#REF!	#REF!	#REF!	#REF!
2	G	#REF!	#REF!	#REF!	#REF!	#REF!	#REF!	#REF!	#REF!	#REF!	#REF!	#REF!	#REF!	#REF!	#REF!	#REF!	#REF!	#REF!	#REF!	#REF!	#REF!	#REF!	#REF!	#REF!	#REF!	#REF!	#REF!	#REF!	#REF!	#REF!	#REF!	#REF!	#REF!	#REF!	#REF!	#REF!	#REF!	#REF!	#REF!	#REF!	#REF!	#REF!	#REF!	#REF!	#REF!	#REF!	#REF!	#REF!	#REF!
3	YPYDVPDYAG	#REF!	#REF!	#REF!	#REF!	#REF!	#REF!	#REF!	#REF!	#REF!	#REF!	#REF!	#REF!	#REF!	#REF!	#REF!	#REF!	#REF!	#REF!	#REF!	#REF!	#REF!	#REF!	#REF!	#REF!	#REF!	#REF!	#REF!	#REF!	#REF!	#REF!	#REF!	#REF!	#REF!	#REF!	#REF!	#REF!	#REF!	#REF!	#REF!	#REF!	#REF!	#REF!	#REF!	#REF!	#REF!	#REF!	#REF!	#REF!
4	G	#REF!	#REF!	#REF!	#REF!	#REF!	#REF!	#REF!	#REF!	#REF!	#REF!	#REF!	#REF!	#REF!	#REF!	#REF!	#REF!	#REF!	#REF!	#REF!	#REF!	#REF!	#REF!	#REF!	#REF!	#REF!	#REF!	#REF!	#REF!	#REF!	#REF!	#REF!	#REF!	#REF!	#REF!	#REF!	#REF!	#REF!	#REF!	#REF!	#REF!	#REF!	#REF!	#REF!	#REF!	#REF!	#REF!	#REF!	#REF!
5	YPYDVPDYAG	#REF!	#REF!	#REF!	#REF!	#REF!	#REF!	#REF!	#REF!	#REF!	#REF!	#REF!	#REF!	#REF!	#REF!	#REF!	#REF!	#REF!	#REF!	#REF!	#REF!	#REF!	#REF!	#REF!	#REF!	#REF!	#REF!	#REF!	#REF!	#REF!	#REF!	#REF!	#REF!	#REF!	#REF!	#REF!	#REF!	#REF!	#REF!	#REF!	#REF!	#REF!	#REF!	#REF!	#REF!	#REF!	#REF!	#REF!	#REF!
6	G	#REF!	#REF!	#REF!	#REF!	#REF!	#REF!	#REF!	#REF!	#REF!	#REF!	#REF!	#REF!	#REF!	#REF!	#REF!	#REF!	#REF!	#REF!	#REF!	#REF!	#REF!	#REF!	#REF!	#REF!	#REF!	#REF!	#REF!	#REF!	#REF!	#REF!	#REF!	#REF!	#REF!	#REF!	#REF!	#REF!	#REF!	#REF!	#REF!	#REF!	#REF!	#REF!	#REF!	#REF!	#REF!	#REF!	#REF!	#REF!
7	YPYDVPDYAG	#REF!	#REF!	#REF!	#REF!	#REF!	#REF!	#REF!	#REF!	#REF!	#REF!	#REF!	#REF!	#REF!	#REF!	#REF!	#REF!	#REF!	#REF!	#REF!	#REF!	#REF!	#REF!	#REF!	#REF!	#REF!	#REF!	#REF!	#REF!	#REF!	#REF!	#REF!	#REF!	#REF!	#REF!	#REF!	#REF!	#REF!	#REF!	#REF!	#REF!	#REF!	#REF!	#REF!	#REF!	#REF!	#REF!	#REF!	#REF!
8	G	#REF!	#REF!	#REF!	#REF!	#REF!	#REF!	#REF!	#REF!	#REF!	#REF!	#REF!	#REF!	#REF!	#REF!	#REF!	#REF!	#REF!	#REF!	#REF!	#REF!	#REF!	#REF!	#REF!	#REF!	#REF!	#REF!	#REF!	#REF!	#REF!	#REF!	#REF!	#REF!	#REF!	#REF!	#REF!	#REF!	#REF!	#REF!	#REF!	#REF!	#REF!	#REF!	#REF!	#REF!	#REF!	#REF!	#REF!	#REF!
9	YPYDVPDYAG	#REF!	#REF!	#REF!	#REF!	#REF!	#REF!	#REF!	#REF!	#REF!	#REF!	#REF!	#REF!	#REF!	#REF!	#REF!	#REF!	#REF!	#REF!	#REF!	#REF!	#REF!	#REF!	#REF!	#REF!	#REF!	#REF!	#REF!	#REF!	#REF!	#REF!	#REF!	#REF!	#REF!	#REF!	#REF!	#REF!	#REF!	#REF!	#REF!	#REF!	#REF!	#REF!	#REF!	#REF!	#REF!	#REF!	#REF!	#REF!
10	G	#REF!	#REF!	#REF!	#REF!	#REF!	#REF!	#REF!	#REF!	#REF!	#REF!	#REF!	#REF!	#REF!	#REF!	#REF!	#REF!	#REF!	#REF!	#REF!	#REF!	#REF!	#REF!	#REF!	#REF!	#REF!	#REF!	#REF!	#REF!	#REF!	#REF!	#REF!	#REF!	#REF!	#REF!	#REF!	#REF!	#REF!	#REF!	#REF!	#REF!	#REF!	#REF!	#REF!	#REF!	#REF!	#REF!	#REF!	#REF!
	YPYDVPDYAG	G	YPYDVPDYAG	G	YPYDVPDYAG	G	YPYDVPDYAG	G	YPYDVPDYAG	G	YPYDVPDYAG	G	YPYDVPDYAG	G	YPYDVPDYAG	G	YPYDVPDYAG	G	YPYDVPDYAG	G	YPYDVPDYAG	G	YPYDVPDYAG	G	YPYDVPDYAG	G	YPYDVPDYAG	G	YPYDVPDYAG	G	YPYDVPDYAG	G	YPYDVPDYAG	G	YPYDVPDYAG	G	YPYDVPDYAG	G	YPYDVPDYAG	G	YPYDVPDYAG	G	YPYDVPDYAG	G	YPYDVPDYAG	G	YPYDVPDYAG	G	YPYDVPDYAG
[truncated: 19 more columns]

## Sheet: Intensity Plot
Intensity Plot PcDBP (PEP20205061690) - Mouse IgG1 Monoclonal Antibody 3D10
The intensity plot is based on the corrected intensity values and sorted from the N- to the C-terminus of the DBL domain of PcDBP.
Spot Family	Row	Column	Peptide	Mouse mAb 3D10, 10 µg/ml
University of Alberta, PcDBP, 20 aa Linear Peptides (PEP20205061690)	2	2	GSGSGSGVNYKEYFDKYQIN	25
University of Alberta, PcDBP, 20 aa Linear Peptides (PEP20205061690)	2	3	SGSGSGVNYKEYFDKYQINE	15
University of Alberta, PcDBP, 20 aa Linear Peptides (PEP20205061690)	2	4	GSGSGVNYKEYFDKYQINEC	5
University of Alberta, PcDBP, 20 aa Linear Peptides (PEP20205061690)	2	5	SGSGVNYKEYFDKYQINECK	12.5
University of Alberta, PcDBP, 20 aa Linear Peptides (PEP20205061690)	2	6	GSGVNYKEYFDKYQINECKQ	0
University of Alberta, PcDBP, 20 aa Linear Peptides (PEP20205061690)	2	7	SGVNYKEYFDKYQINECKQK	24.5
University of Alberta, PcDBP, 20 aa Linear Peptides (PEP20205061690)	2	8	GVNYKEYFDKYQINECKQKE	7.75
University of Alberta, PcDBP, 20 aa Linear Peptides (PEP20205061690)	2	9	VNYKEYFDKYQINECKQKEK	23
University of Alberta, PcDBP, 20 aa Linear Peptides (PEP20205061690)	2	10	NYKEYFDKYQINECKQKEKT	24
University of Alberta, PcDBP, 20 aa Linear Peptides (PEP20205061690)	2	11	YKEYFDKYQINECKQKEKTE	0
University of Alberta, PcDBP, 20 aa Linear Peptides (PEP20205061690)	2	12	KEYFDKYQINECKQKEKTEI	0
University of Alberta, PcDBP, 20 aa Linear Peptides (PEP20205061690)	2	13	EYFDKYQINECKQKEKTEIH	0
University of Alberta, PcDBP, 20 aa Linear Peptides (PEP20205061690)	2	14	YFDKYQINECKQKEKTEIHA	0
University of Alberta, PcDBP, 20 aa Linear Peptides (PEP20205061690)	2	15	FDKYQINECKQKEKTEIHAW	0
University of Alberta, PcDBP, 20 aa Linear Peptides (PEP20205061690)	2	16	DKYQINECKQKEKTEIHAWV	0
University of Alberta, PcDBP, 20 aa Linear Peptides (PEP20205061690)	2	17	KYQINECKQKEKTEIHAWVC	0
University of Alberta, PcDBP, 20 aa Linear Peptides (PEP20205061690)	2	18	YQINECKQKEKTEIHAWVCD	0
University of Alberta, PcDBP, 20 aa Linear Peptides (PEP20205061690)	2	19	QINECKQKEKTEIHAWVCDE	0
University of Alberta, PcDBP, 20 aa Linear Peptides (PEP20205061690)	2	20	INECKQKEKTEIHAWVCDEK	0
University of Alberta, PcDBP, 20 aa Linear Peptides (PEP20205061690)	2	21	NECKQKEKTEIHAWVCDEKK	0
University of Alberta, PcDBP, 20 aa Linear Peptides (PEP20205061690)	2	22	ECKQKEKTEIHAWVCDEKKQ	0
University of Alberta, PcDBP, 20 aa Linear Peptides (PEP20205061690)	2	23	CKQKEKTEIHAWVCDEKKQN	0
University of Alberta, PcDBP, 20 aa Linear Peptides (PEP20205061690)	2	24	KQKEKTEIHAWVCDEKKQNC	0
University of Alberta, PcDBP, 20 aa Linear Peptides (PEP20205061690)	2	25	QKEKTEIHAWVCDEKKQNCA	0
University of Alberta, PcDBP, 20 aa Linear Peptides (PEP20205061690)	2	26	KEKTEIHAWVCDEKKQNCAP	0
University of Alberta, PcDBP, 20 aa Linear Peptides (PEP20205061690)	2	27	EKTEIHAWVCDEKKQNCAPS	0
University of Alberta, PcDBP, 20 aa Linear Peptides (PEP20205061690)	2	28	KTEIHAWVCDEKKQNCAPSR	0
University of Alberta, PcDBP, 20 aa Linear Peptides (PEP20205061690)	2	29	TEIHAWVCDEKKQNCAPSRR	0
University of Alberta, PcDBP, 20 aa Linear Peptides (PEP20205061690)	2	30	EIHAWVCDEKKQNCAPSRRI	0
University of Alberta, PcDBP, 20 aa Linear Peptides (PEP20205061690)	2	31	IHAWVCDEKKQNCAPSRRIN	0
University of Alberta, PcDBP, 20 aa Linear Peptides (PEP20205061690)	2	32	HAWVCDEKKQNCAPSRRINL	0
University of Alberta, PcDBP, 20 aa Linear Peptides (PEP20205061690)	2	33	AWVCDEKKQNCAPSRRINLC	0
University of Alberta, PcDBP, 20 aa Linear Peptides (PEP20205061690)	2	34	WVCDEKKQNCAPSRRINLCT	4.5
University of Alberta, PcDBP, 20 aa Linear Peptides (PEP20205061690)	2	35	VCDEKKQNCAPSRRINLCTN	0
University of Alberta, PcDBP, 20 aa Linear Peptides (PEP20205061690)	2	36	CDEKKQNCAPSRRINLCTNR	0
University of Alberta, PcDBP, 20 aa Linear Peptides (PEP20205061690)	2	37	DEKKQNCAPSRRINLCTNRL	7
University of Alberta, PcDBP, 20 aa Linear Peptides (PEP20205061690)	2	38	EKKQNCAPSRRINLCTNRLE	4
University of Alberta, PcDBP, 20 aa Linear Peptides (PEP20205061690)	2	39	KKQNCAPSRRINLCTNRLEI	0
University of Alberta, PcDBP, 20 aa Linear Peptides (PEP20205061690)	2	40	KQNCAPSRRINLCTNRLEII	0
University of Alberta, PcDBP, 20 aa Linear Peptides (PEP20205061690)	2	41	QNCAPSRRINLCTNRLEIIP	7.5
University of Alberta, PcDBP, 20 aa Linear Peptides (PEP20205061690)	2	42	NCAPSRRINLCTNRLEIIPD	0
University of Alberta, PcDBP, 20 aa Linear Peptides (PEP20205061690)	2	43	CAPSRRINLCTNRLEIIPDK	0
University of Alberta, PcDBP, 20 aa Linear Peptides (PEP20205061690)	2	44	APSRRINLCTNRLEIIPDKI	0
University of Alberta, PcDBP, 20 aa Linear Peptides (PEP20205061690)	2	45	PSRRINLCTNRLEIIPDKIE	2
University of Alberta, PcDBP, 20 aa Linear Peptides (PEP20205061690)	2	46	SRRINLCTNRLEIIPDKIEI	0
University of Alberta, PcDBP, 20 aa Linear Peptides (PEP20205061690)	2	47	RRINLCTNRLEIIPDKIEIK	7
University of Alberta, PcDBP, 20 aa Linear Peptides (PEP20205061690)	2	48	RINLCTNRLEIIPDKIEIKD	0
University of Alberta, PcDBP, 20 aa Linear Peptides (PEP20205061690)	2	49	INLCTNRLEIIPDKIEIKDN	0
University of Alberta, PcDBP, 20 aa Linear Peptides (PEP20205061690)	2	50	NLCTNRLEIIPDKIEIKDNE	0
University of Alberta, PcDBP, 20 aa Linear Peptides (PEP20205061690)	2	51	LCTNRLEIIPDKIEIKDNEM	0
University of Alberta, PcDBP, 20 aa Linear Peptides (PEP20205061690)	2	52	CTNRLEIIPDKIEIKDNEMK	0
University of Alberta, PcDBP, 20 aa Linear Peptides (PEP20205061690)	2	53	TNRLEIIPDKIEIKDNEMKE	0
University of Alberta, PcDBP, 20 aa Linear Peptides (PEP20205061690)	2	54	NRLEIIPDKIEIKDNEMKEL	0
University of Alberta, PcDBP, 20 aa Linear Peptides (PEP20205061690)	2	55	RLEIIPDKIEIKDNEMKELL	0
University of Alberta, PcDBP, 20 aa Linear Peptides (PEP20205061690)	2	56	LEIIPDKIEIKDNEMKELLM	0
University of Alberta, PcDBP, 20 aa Linear Peptides (PEP20205061690)	2	57	EIIPDKIEIKDNEMKELLMD	0
University of Alberta, PcDBP, 20 aa Linear Peptides (PEP20205061690)	2	58	IIPDKIEIKDNEMKELLMDY	0
University of Alberta, PcDBP, 20 aa Linear Peptides (PEP20205061690)	2	59	IPDKIEIKDNEMKELLMDYF	0
University of Alberta, PcDBP, 20 aa Linear Peptides (PEP20205061690)	2	60	PDKIEIKDNEMKELLMDYFK	0
University of Alberta, PcDBP, 20 aa Linear Peptides (PEP20205061690)	2	61	DKIEIKDNEMKELLMDYFKK	0
University of Alberta, PcDBP, 20 aa Linear Peptides (PEP20205061690)	2	62	KIEIKDNEMKELLMDYFKKF	0
University of Alberta, PcDBP, 20 aa Linear Peptides (PEP20205061690)	2	63	IEIKDNEMKELLMDYFKKFI	0
University of Alberta, PcDBP, 20 aa Linear Peptides (PEP20205061690)	2	64	EIKDNEMKELLMDYFKKFIY	0
University of Alberta, PcDBP, 20 aa Linear Peptides (PEP20205061690)	2	65	IKDNEMKELLMDYFKKFIYE	0
University of Alberta, PcDBP, 20 aa Linear Peptides (PEP20205061690)	2	66	KDNEMKELLMDYFKKFIYED	0
University of Alberta, PcDBP, 20 aa Linear Peptides (PEP20205061690)	2	67	DNEMKELLMDYFKKFIYEDA	0
University of Alberta, PcDBP, 20 aa Linear Peptides (PEP20205061690)	4	2	NEMKELLMDYFKKFIYEDAA	0
University of Alberta, PcDBP, 20 aa Linear Peptides (PEP20205061690)	4	3	EMKELLMDYFKKFIYEDAAN	3
University of Alberta, PcDBP, 20 aa Linear Peptides (PEP20205061690)	4	4	MKELLMDYFKKFIYEDAANE	0
University of Alberta, PcDBP, 20 aa Linear Peptides (PEP20205061690)	4	5	KELLMDYFKKFIYEDAANEG	0
University of Alberta, PcDBP, 20 aa Linear Peptides (PEP20205061690)	4	6	ELLMDYFKKFIYEDAANEGK	0
University of Alberta, PcDBP, 20 aa Linear Peptides (PEP20205061690)	4	7	LLMDYFKKFIYEDAANEGKL	0
University of Alberta, PcDBP, 20 aa Linear Peptides (PEP20205061690)	4	8	LMDYFKKFIYEDAANEGKLL	0
University of Alberta, PcDBP, 20 aa Linear Peptides (PEP20205061690)	4	9	MDYFKKFIYEDAANEGKLLL	0
University of Alberta, PcDBP, 20 aa Linear Peptides (PEP20205061690)	4	10	DYFKKFIYEDAANEGKLLLN	0
University of Alberta, PcDBP, 20 aa Linear Peptides (PEP20205061690)	4	11	YFKKFIYEDAANEGKLLLNK	0
University of Alberta, PcDBP, 20 aa Linear Peptides (PEP20205061690)	4	12	FKKFIYEDAANEGKLLLNKY	0
University of Alberta, PcDBP, 20 aa Linear Peptides (PEP20205061690)	4	13	KKFIYEDAANEGKLLLNKYD	0
University of Alberta, PcDBP, 20 aa Linear Peptides (PEP20205061690)	4	14	KFIYEDAANEGKLLLNKYDD	0
University of Alberta, PcDBP, 20 aa Linear Peptides (PEP20205061690)	4	15	FIYEDAANEGKLLLNKYDDK	20
University of Alberta, PcDBP, 20 aa Linear Peptides (PEP20205061690)	4	16	IYEDAANEGKLLLNKYDDKN	9.5
University of Alberta, PcDBP, 20 aa Linear Peptides (PEP20205061690)	4	17	YEDAANEGKLLLNKYDDKNN	0
University of Alberta, PcDBP, 20 aa Linear Peptides (PEP20205061690)	4	18	EDAANEGKLLLNKYDDKNNN	0
University of Alberta, PcDBP, 20 aa Linear Peptides (PEP20205061690)	4	19	DAANEGKLLLNKYDDKNNNE	0
University of Alberta, PcDBP, 20 aa Linear Peptides (PEP20205061690)	4	20	AANEGKLLLNKYDDKNNNEY	0
University of Alberta, PcDBP, 20 aa Linear Peptides (PEP20205061690)	4	21	ANEGKLLLNKYDDKNNNEYC	0
University of Alberta, PcDBP, 20 aa Linear Peptides (PEP20205061690)	4	22	NEGKLLLNKYDDKNNNEYCN	0
University of Alberta, PcDBP, 20 aa Linear Peptides (PEP20205061690)	4	23	EGKLLLNKYDDKNNNEYCND	0
University of Alberta, PcDBP, 20 aa Linear Peptides (PEP20205061690)	4	24	GKLLLNKYDDKNNNEYCNDM	0
University of Alberta, PcDBP, 20 aa Linear Peptides (PEP20205061690)	4	25	KLLLNKYDDKNNNEYCNDMV	0
University of Alberta, PcDBP, 20 aa Linear Peptides (PEP20205061690)	4	26	LLLNKYDDKNNNEYCNDMVN	0
University of Alberta, PcDBP, 20 aa Linear Peptides (PEP20205061690)	4	27	LLNKYDDKNNNEYCNDMVNS	0
University of Alberta, PcDBP, 20 aa Linear Peptides (PEP20205061690)	4	28	LNKYDDKNNNEYCNDMVNSF	0
University of Alberta, PcDBP, 20 aa Linear Peptides (PEP20205061690)	4	29	NKYDDKNNNEYCNDMVNSFG	5.5
University of Alberta, PcDBP, 20 aa Linear Peptides (PEP20205061690)	4	30	KYDDKNNNEYCNDMVNSFGD	0
University of Alberta, PcDBP, 20 aa Linear Peptides (PEP20205061690)	4	31	YDDKNNNEYCNDMVNSFGDY	0
University of Alberta, PcDBP, 20 aa Linear Peptides (PEP20205061690)	4	32	DDKNNNEYCNDMVNSFGDYK	0
University of Alberta, PcDBP, 20 aa Linear Peptides (PEP20205061690)	4	33	DKNNNEYCNDMVNSFGDYKN	0
University of Alberta, PcDBP, 20 aa Linear Peptides (PEP20205061690)	4	34	KNNNEYCNDMVNSFGDYKNI	6
University of Alberta, PcDBP, 20 aa Linear Peptides (PEP20205061690)	4	35	NNNEYCNDMVNSFGDYKNIV	0
University of Alberta, PcDBP, 20 aa Linear Peptides (PEP20205061690)	4	36	NNEYCNDMVNSFGDYKNIVE	0
University of Alberta, PcDBP, 20 aa Linear Peptides (PEP20205061690)	4	37	NEYCNDMVNSFGDYKNIVEG	0
University of Alberta, PcDBP, 20 aa Linear Peptides (PEP20205061690)	4	38	EYCNDMVNSFGDYKNIVEGT	0
University of Alberta, PcDBP, 20 aa Linear Peptides (PEP20205061690)	4	39	YCNDMVNSFGDYKNIVEGTG	0
University of Alberta, PcDBP, 20 aa Linear Peptides (PEP20205061690)	4	40	CNDMVNSFGDYKNIVEGTGL	0
University of Alberta, PcDBP, 20 aa Linear Peptides (PEP20205061690)	4	41	NDMVNSFGDYKNIVEGTGLK	14
University of Alberta, PcDBP, 20 aa Linear Peptides (PEP20205061690)	4	42	DMVNSFGDYKNIVEGTGLKN	5
University of Alberta, PcDBP, 20 aa Linear Peptides (PEP20205061690)	4	43	MVNSFGDYKNIVEGTGLKNV	0
University of Alberta, PcDBP, 20 aa Linear Peptides (PEP20205061690)	4	44	VNSFGDYKNIVEGTGLKNVA	0
University of Alberta, PcDBP, 20 aa Linear Peptides (PEP20205061690)	4	45	NSFGDYKNIVEGTGLKNVAN	2
University of Alberta, PcDBP, 20 aa Linear Peptides (PEP20205061690)	4	46	SFGDYKNIVEGTGLKNVANE	0
University of Alberta, PcDBP, 20 aa Linear Peptides (PEP20205061690)	4	47	FGDYKNIVEGTGLKNVANEN	0
University of Alberta, PcDBP, 20 aa Linear Peptides (PEP20205061690)	4	48	GDYKNIVEGTGLKNVANENL	0
University of Alberta, PcDBP, 20 aa Linear Peptides (PEP20205061690)	4	49	DYKNIVEGTGLKNVANENLL	0
University of Alberta, PcDBP, 20 aa Linear Peptides (PEP20205061690)	4	50	YKNIVEGTGLKNVANENLLE	0
University of Alberta, PcDBP, 20 aa Linear Peptides (PEP20205061690)	4	51	KNIVEGTGLKNVANENLLEL	0
University of Alberta, PcDBP, 20 aa Linear Peptides (PEP20205061690)	4	52	NIVEGTGLKNVANENLLELK	0
University of Alberta, PcDBP, 20 aa Linear Peptides (PEP20205061690)	4	53	IVEGTGLKNVANENLLELKI	0
University of Alberta, PcDBP, 20 aa Linear Peptides (PEP20205061690)	4	54	VEGTGLKNVANENLLELKIQ	5.5
University of Alberta, PcDBP, 20 aa Linear Peptides (PEP20205061690)	4	55	EGTGLKNVANENLLELKIQN	0
University of Alberta, PcDBP, 20 aa Linear Peptides (PEP20205061690)	4	56	GTGLKNVANENLLELKIQNI	0
University of Alberta, PcDBP, 20 aa Linear Peptides (PEP20205061690)	4	57	TGLKNVANENLLELKIQNIF	0
University of Alberta, PcDBP, 20 aa Linear Peptides (PEP20205061690)	4	58	GLKNVANENLLELKIQNIFG	0
University of Alberta, PcDBP, 20 aa Linear Peptides (PEP20205061690)	4	59	LKNVANENLLELKIQNIFGT	0
University of Alberta, PcDBP, 20 aa Linear Peptides (PEP20205061690)	4	60	KNVANENLLELKIQNIFGTD	0
University of Alberta, PcDBP, 20 aa Linear Peptides (PEP20205061690)	4	61	NVANENLLELKIQNIFGTDD	0
University of Alberta, PcDBP, 20 aa Linear Peptides (PEP20205061690)	4	62	VANENLLELKIQNIFGTDDN	0
University of Alberta, PcDBP, 20 aa Linear Peptides (PEP20205061690)	4	63	ANENLLELKIQNIFGTDDNA	0
University of Alberta, PcDBP, 20 aa Linear Peptides (PEP20205061690)	4	64	NENLLELKIQNIFGTDDNAK	0
University of Alberta, PcDBP, 20 aa Linear Peptides (PEP20205061690)	4	65	ENLLELKIQNIFGTDDNAKR	0
University of Alberta, PcDBP, 20 aa Linear Peptides (PEP20205061690)	4	66	NLLELKIQNIFGTDDNAKRD	0
University of Alberta, PcDBP, 20 aa Linear Peptides (PEP20205061690)	4	67	LLELKIQNIFGTDDNAKRDR	0
University of Alberta, PcDBP, 20 aa Linear Peptides (PEP20205061690)	6	2	LELKIQNIFGTDDNAKRDRK	33.5
University of Alberta, PcDBP, 20 aa Linear Peptides (PEP20205061690)	6	3	ELKIQNIFGTDDNAKRDRKI	379.5
University of Alberta, PcDBP, 20 aa Linear Peptides (PEP20205061690)	6	4	LKIQNIFGTDDNAKRDRKIW	36
University of Alberta, PcDBP, 20 aa Linear Peptides (PEP20205061690)	6	5	KIQNIFGTDDNAKRDRKIWW	16.5
University of Alberta, PcDBP, 20 aa Linear Peptides (PEP20205061690)	6	6	IQNIFGTDDNAKRDRKIWWK	20.5
University of Alberta, PcDBP, 20 aa Linear Peptides (PEP20205061690)	6	7	QNIFGTDDNAKRDRKIWWKR	14
University of Alberta, PcDBP, 20 aa Linear Peptides (PEP20205061690)	6	8	NIFGTDDNAKRDRKIWWKRH	0
University of Alberta, PcDBP, 20 aa Linear Peptides (PEP20205061690)	6	9	IFGTDDNAKRDRKIWWKRHE	0
University of Alberta, PcDBP, 20 aa Linear Peptides (PEP20205061690)	6	10	FGTDDNAKRDRKIWWKRHEN	0
University of Alberta, PcDBP, 20 aa Linear Peptides (PEP20205061690)	6	11	GTDDNAKRDRKIWWKRHENI	0
University of Alberta, PcDBP, 20 aa Linear Peptides (PEP20205061690)	6	12	TDDNAKRDRKIWWKRHENII	0
University of Alberta, PcDBP, 20 aa Linear Peptides (PEP20205061690)	6	13	DDNAKRDRKIWWKRHENIIW	0
University of Alberta, PcDBP, 20 aa Linear Peptides (PEP20205061690)	6	14	DNAKRDRKIWWKRHENIIWK	0
University of Alberta, PcDBP, 20 aa Linear Peptides (PEP20205061690)	6	15	NAKRDRKIWWKRHENIIWKA	0
University of Alberta, PcDBP, 20 aa Linear Peptides (PEP20205061690)	6	16	AKRDRKIWWKRHENIIWKAM	0
University of Alberta, PcDBP, 20 aa Linear Peptides (PEP20205061690)	6	17	KRDRKIWWKRHENIIWKAMV	0
University of Alberta, PcDBP, 20 aa Linear Peptides (PEP20205061690)	6	18	RDRKIWWKRHENIIWKAMVL	0
University of Alberta, PcDBP, 20 aa Linear Peptides (PEP20205061690)	6	19	DRKIWWKRHENIIWKAMVLG	0
University of Alberta, PcDBP, 20 aa Linear Peptides (PEP20205061690)	6	20	RKIWWKRHENIIWKAMVLGK	0
University of Alberta, PcDBP, 20 aa Linear Peptides (PEP20205061690)	6	21	KIWWKRHENIIWKAMVLGKD	0
University of Alberta, PcDBP, 20 aa Linear Peptides (PEP20205061690)	6	22	IWWKRHENIIWKAMVLGKDF	6
University of Alberta, PcDBP, 20 aa Linear Peptides (PEP20205061690)	6	23	WWKRHENIIWKAMVLGKDFN	0
University of Alberta, PcDBP, 20 aa Linear Peptides (PEP20205061690)	6	24	WKRHENIIWKAMVLGKDFNE	0
University of Alberta, PcDBP, 20 aa Linear Peptides (PEP20205061690)	6	25	KRHENIIWKAMVLGKDFNEA	0
University of Alberta, PcDBP, 20 aa Linear Peptides (PEP20205061690)	6	26	RHENIIWKAMVLGKDFNEAS	0
University of Alberta, PcDBP, 20 aa Linear Peptides (PEP20205061690)	6	27	HENIIWKAMVLGKDFNEASN	0
University of Alberta, PcDBP, 20 aa Linear Peptides (PEP20205061690)	6	28	ENIIWKAMVLGKDFNEASNY	0
University of Alberta, PcDBP, 20 aa Linear Peptides (PEP20205061690)	6	29	NIIWKAMVLGKDFNEASNYE	0
University of Alberta, PcDBP, 20 aa Linear Peptides (PEP20205061690)	6	30	IIWKAMVLGKDFNEASNYEN	0
University of Alberta, PcDBP, 20 aa Linear Peptides (PEP20205061690)	6	31	IWKAMVLGKDFNEASNYENI	0
University of Alberta, PcDBP, 20 aa Linear Peptides (PEP20205061690)	6	32	WKAMVLGKDFNEASNYENIC	0
University of Alberta, PcDBP, 20 aa Linear Peptides (PEP20205061690)	6	33	KAMVLGKDFNEASNYENICT	8.75
University of Alberta, PcDBP, 20 aa Linear Peptides (PEP20205061690)	6	34	AMVLGKDFNEASNYENICTN	8.5
University of Alberta, PcDBP, 20 aa Linear Peptides (PEP20205061690)	6	35	MVLGKDFNEASNYENICTNY	0
University of Alberta, PcDBP, 20 aa Linear Peptides (PEP20205061690)	6	36	VLGKDFNEASNYENICTNYK	0
University of Alberta, PcDBP, 20 aa Linear Peptides (PEP20205061690)	6	37	LGKDFNEASNYENICTNYKL	18
University of Alberta, PcDBP, 20 aa Linear Peptides (PEP20205061690)	6	38	GKDFNEASNYENICTNYKLE	0
University of Alberta, PcDBP, 20 aa Linear Peptides (PEP20205061690)	6	39	KDFNEASNYENICTNYKLED	0
University of Alberta, PcDBP, 20 aa Linear Peptides (PEP20205061690)	6	40	DFNEASNYENICTNYKLEDH	2
University of Alberta, PcDBP, 20 aa Linear Peptides (PEP20205061690)	6	41	FNEASNYENICTNYKLEDHH	0
University of Alberta, PcDBP, 20 aa Linear Peptides (PEP20205061690)	6	42	NEASNYENICTNYKLEDHHS	0
University of Alberta, PcDBP, 20 aa Linear Peptides (PEP20205061690)	6	43	EASNYENICTNYKLEDHHSQ	0
University of Alberta, PcDBP, 20 aa Linear Peptides (PEP20205061690)	6	44	ASNYENICTNYKLEDHHSQI	0
University of Alberta, PcDBP, 20 aa Linear Peptides (PEP20205061690)	6	45	SNYENICTNYKLEDHHSQIE	0
University of Alberta, PcDBP, 20 aa Linear Peptides (PEP20205061690)	6	46	NYENICTNYKLEDHHSQIER	13
University of Alberta, PcDBP, 20 aa Linear Peptides (PEP20205061690)	6	47	YENICTNYKLEDHHSQIERW	12.5
University of Alberta, PcDBP, 20 aa Linear Peptides (PEP20205061690)	6	48	ENICTNYKLEDHHSQIERWA	0
University of Alberta, PcDBP, 20 aa Linear Peptides (PEP20205061690)	6	49	NICTNYKLEDHHSQIERWAR	0
University of Alberta, PcDBP, 20 aa Linear Peptides (PEP20205061690)	6	50	ICTNYKLEDHHSQIERWARE	11.5
University of Alberta, PcDBP, 20 aa Linear Peptides (PEP20205061690)	6	51	CTNYKLEDHHSQIERWAREW	13.5
University of Alberta, PcDBP, 20 aa Linear Peptides (PEP20205061690)	6	52	TNYKLEDHHSQIERWAREWI	17
University of Alberta, PcDBP, 20 aa Linear Peptides (PEP20205061690)	6	53	NYKLEDHHSQIERWAREWIQ	9.5
University of Alberta, PcDBP, 20 aa Linear Peptides (PEP20205061690)	6	54	YKLEDHHSQIERWAREWIQE	6
University of Alberta, PcDBP, 20 aa Linear Peptides (PEP20205061690)	6	55	KLEDHHSQIERWAREWIQEF	6.5
University of Alberta, PcDBP, 20 aa Linear Peptides (PEP20205061690)	6	56	LEDHHSQIERWAREWIQEFS	0
University of Alberta, PcDBP, 20 aa Linear Peptides (PEP20205061690)	6	57	EDHHSQIERWAREWIQEFSV	0
University of Alberta, PcDBP, 20 aa Linear Peptides (PEP20205061690)	6	58	DHHSQIERWAREWIQEFSVQ	0
University of Alberta, PcDBP, 20 aa Linear Peptides (PEP20205061690)	6	59	HHSQIERWAREWIQEFSVQY	0
University of Alberta, PcDBP, 20 aa Linear Peptides (PEP20205061690)	6	60	HSQIERWAREWIQEFSVQYF	0
University of Alberta, PcDBP, 20 aa Linear Peptides (PEP20205061690)	6	61	SQIERWAREWIQEFSVQYFK	0
University of Alberta, PcDBP, 20 aa Linear Peptides (PEP20205061690)	6	62	QIERWAREWIQEFSVQYFKE	0
University of Alberta, PcDBP, 20 aa Linear Peptides (PEP20205061690)	6	63	IERWAREWIQEFSVQYFKEA	0
University of Alberta, PcDBP, 20 aa Linear Peptides (PEP20205061690)	6	64	ERWAREWIQEFSVQYFKEAN	0
University of Alberta, PcDBP, 20 aa Linear Peptides (PEP20205061690)	6	65	RWAREWIQEFSVQYFKEANK	0
University of Alberta, PcDBP, 20 aa Linear Peptides (PEP20205061690)	6	66	WAREWIQEFSVQYFKEANKI	0
University of Alberta, PcDBP, 20 aa Linear Peptides (PEP20205061690)	6	67	AREWIQEFSVQYFKEANKIN	0
University of Alberta, PcDBP, 20 aa Linear Peptides (PEP20205061690)	8	2	REWIQEFSVQYFKEANKINN	0
University of Alberta, PcDBP, 20 aa Linear Peptides (PEP20205061690)	8	3	EWIQEFSVQYFKEANKINNK	0
University of Alberta, PcDBP, 20 aa Linear Peptides (PEP20205061690)	8	4	WIQEFSVQYFKEANKINNKC	0
University of Alberta, PcDBP, 20 aa Linear Peptides (PEP20205061690)	8	5	IQEFSVQYFKEANKINNKCI	0
University of Alberta, PcDBP, 20 aa Linear Peptides (PEP20205061690)	8	6	QEFSVQYFKEANKINNKCIK	0
University of Alberta, PcDBP, 20 aa Linear Peptides (PEP20205061690)	8	7	EFSVQYFKEANKINNKCIKK	89.75
University of Alberta, PcDBP, 20 aa Linear Peptides (PEP20205061690)	8	8	FSVQYFKEANKINNKCIKKS	204.5
University of Alberta, PcDBP, 20 aa Linear Peptides (PEP20205061690)	8	9	SVQYFKEANKINNKCIKKSN	79.5
University of Alberta, PcDBP, 20 aa Linear Peptides (PEP20205061690)	8	10	VQYFKEANKINNKCIKKSNI	55.5
University of Alberta, PcDBP, 20 aa Linear Peptides (PEP20205061690)	8	11	QYFKEANKINNKCIKKSNIF	0
University of Alberta, PcDBP, 20 aa Linear Peptides (PEP20205061690)	8	12	YFKEANKINNKCIKKSNIFT	0
University of Alberta, PcDBP, 20 aa Linear Peptides (PEP20205061690)	8	13	FKEANKINNKCIKKSNIFTE	0
University of Alberta, PcDBP, 20 aa Linear Peptides (PEP20205061690)	8	14	KEANKINNKCIKKSNIFTES	0
University of Alberta, PcDBP, 20 aa Linear Peptides (PEP20205061690)	8	15	EANKINNKCIKKSNIFTESI	0
University of Alberta, PcDBP, 20 aa Linear Peptides (PEP20205061690)	8	16	ANKINNKCIKKSNIFTESIC	0
University of Alberta, PcDBP, 20 aa Linear Peptides (PEP20205061690)	8	17	NKINNKCIKKSNIFTESICT	0
University of Alberta, PcDBP, 20 aa Linear Peptides (PEP20205061690)	8	18	KINNKCIKKSNIFTESICTD	0
University of Alberta, PcDBP, 20 aa Linear Peptides (PEP20205061690)	8	19	INNKCIKKSNIFTESICTDN	0
University of Alberta, PcDBP, 20 aa Linear Peptides (PEP20205061690)	8	20	NNKCIKKSNIFTESICTDNN	0
University of Alberta, PcDBP, 20 aa Linear Peptides (PEP20205061690)	8	21	NKCIKKSNIFTESICTDNNC	0
University of Alberta, PcDBP, 20 aa Linear Peptides (PEP20205061690)	8	22	KCIKKSNIFTESICTDNNCK	0
University of Alberta, PcDBP, 20 aa Linear Peptides (PEP20205061690)	8	23	CIKKSNIFTESICTDNNCKT	2
University of Alberta, PcDBP, 20 aa Linear Peptides (PEP20205061690)	8	24	IKKSNIFTESICTDNNCKTA	0
University of Alberta, PcDBP, 20 aa Linear Peptides (PEP20205061690)	8	25	KKSNIFTESICTDNNCKTAC	0
University of Alberta, PcDBP, 20 aa Linear Peptides (PEP20205061690)	8	26	KSNIFTESICTDNNCKTACN	0
University of Alberta, PcDBP, 20 aa Linear Peptides (PEP20205061690)	8	27	SNIFTESICTDNNCKTACNA	0
University of Alberta, PcDBP, 20 aa Linear Peptides (PEP20205061690)	8	28	NIFTESICTDNNCKTACNAY	0
University of Alberta, PcDBP, 20 aa Linear Peptides (PEP20205061690)	8	29	IFTESICTDNNCKTACNAYE	0
University of Alberta, PcDBP, 20 aa Linear Peptides (PEP20205061690)	8	30	FTESICTDNNCKTACNAYET	0
University of Alberta, PcDBP, 20 aa Linear Peptides (PEP20205061690)	8	31	TESICTDNNCKTACNAYETW	0
University of Alberta, PcDBP, 20 aa Linear Peptides (PEP20205061690)	8	32	ESICTDNNCKTACNAYETWI	7
University of Alberta, PcDBP, 20 aa Linear Peptides (PEP20205061690)	8	33	SICTDNNCKTACNAYETWIN	0
University of Alberta, PcDBP, 20 aa Linear Peptides (PEP20205061690)	8	34	ICTDNNCKTACNAYETWINV	0
University of Alberta, PcDBP, 20 aa Linear Peptides (PEP20205061690)	8	35	CTDNNCKTACNAYETWINVN	0
University of Alberta, PcDBP, 20 aa Linear Peptides (PEP20205061690)	8	36	TDNNCKTACNAYETWINVNK	0
University of Alberta, PcDBP, 20 aa Linear Peptides (PEP20205061690)	8	37	DNNCKTACNAYETWINVNKS	0
University of Alberta, PcDBP, 20 aa Linear Peptides (PEP20205061690)	8	38	NNCKTACNAYETWINVNKSK	8.5
University of Alberta, PcDBP, 20 aa Linear Peptides (PEP20205061690)	8	39	NCKTACNAYETWINVNKSKW	0
University of Alberta, PcDBP, 20 aa Linear Peptides (PEP20205061690)	8	40	CKTACNAYETWINVNKSKWN	4.5
University of Alberta, PcDBP, 20 aa Linear Peptides (PEP20205061690)	8	41	KTACNAYETWINVNKSKWNT	0
University of Alberta, PcDBP, 20 aa Linear Peptides (PEP20205061690)	8	42	TACNAYETWINVNKSKWNTL	14.5
University of Alberta, PcDBP, 20 aa Linear Peptides (PEP20205061690)	8	43	ACNAYETWINVNKSKWNTLL	14
University of Alberta, PcDBP, 20 aa Linear Peptides (PEP20205061690)	8	44	CNAYETWINVNKSKWNTLLK	8.25
University of Alberta, PcDBP, 20 aa Linear Peptides (PEP20205061690)	8	45	NAYETWINVNKSKWNTLLKS	14.5
University of Alberta, PcDBP, 20 aa Linear Peptides (PEP20205061690)	8	46	AYETWINVNKSKWNTLLKSF	0
University of Alberta, PcDBP, 20 aa Linear Peptides (PEP20205061690)	8	47	YETWINVNKSKWNTLLKSFA	0
University of Alberta, PcDBP, 20 aa Linear Peptides (PEP20205061690)	8	48	ETWINVNKSKWNTLLKSFAN	0
University of Alberta, PcDBP, 20 aa Linear Peptides (PEP20205061690)	8	49	TWINVNKSKWNTLLKSFANF	0
University of Alberta, PcDBP, 20 aa Linear Peptides (PEP20205061690)	8	50	WINVNKSKWNTLLKSFANFK	0
University of Alberta, PcDBP, 20 aa Linear Peptides (PEP20205061690)	8	51	INVNKSKWNTLLKSFANFKT	8.75
University of Alberta, PcDBP, 20 aa Linear Peptides (PEP20205061690)	8	52	NVNKSKWNTLLKSFANFKTD	7
University of Alberta, PcDBP, 20 aa Linear Peptides (PEP20205061690)	8	53	VNKSKWNTLLKSFANFKTDY	0
University of Alberta, PcDBP, 20 aa Linear Peptides (PEP20205061690)	8	54	NKSKWNTLLKSFANFKTDYF	0
University of Alberta, PcDBP, 20 aa Linear Peptides (PEP20205061690)	8	55	KSKWNTLLKSFANFKTDYFS	0
University of Alberta, PcDBP, 20 aa Linear Peptides (PEP20205061690)	8	56	SKWNTLLKSFANFKTDYFSE	0
University of Alberta, PcDBP, 20 aa Linear Peptides (PEP20205061690)	8	57	KWNTLLKSFANFKTDYFSEE	0
University of Alberta, PcDBP, 20 aa Linear Peptides (PEP20205061690)	8	58	WNTLLKSFANFKTDYFSEET	0
University of Alberta, PcDBP, 20 aa Linear Peptides (PEP20205061690)	8	59	NTLLKSFANFKTDYFSEETC	0
University of Alberta, PcDBP, 20 aa Linear Peptides (PEP20205061690)	8	60	TLLKSFANFKTDYFSEETCR	0
University of Alberta, PcDBP, 20 aa Linear Peptides (PEP20205061690)	8	61	LLKSFANFKTDYFSEETCRD	0
University of Alberta, PcDBP, 20 aa Linear Peptides (PEP20205061690)	8	62	LKSFANFKTDYFSEETCRDK	0
University of Alberta, PcDBP, 20 aa Linear Peptides (PEP20205061690)	8	63	KSFANFKTDYFSEETCRDKA	0
University of Alberta, PcDBP, 20 aa Linear Peptides (PEP20205061690)	8	64	SFANFKTDYFSEETCRDKAY	0
University of Alberta, PcDBP, 20 aa Linear Peptides (PEP20205061690)	8	65	FANFKTDYFSEETCRDKAYN	0
University of Alberta, PcDBP, 20 aa Linear Peptides (PEP20205061690)	8	66	ANFKTDYFSEETCRDKAYNS	0
University of Alberta, PcDBP, 20 aa Linear Peptides (PEP20205061690)	8	67	NFKTDYFSEETCRDKAYNSL	0
University of Alberta, PcDBP, 20 aa Linear Peptides (PEP20205061690)	10	2	FKTDYFSEETCRDKAYNSLM	0
University of Alberta, PcDBP, 20 aa Linear Peptides (PEP20205061690)	10	3	KTDYFSEETCRDKAYNSLMI	0
University of Alberta, PcDBP, 20 aa Linear Peptides (PEP20205061690)	10	4	TDYFSEETCRDKAYNSLMIE	0
University of Alberta, PcDBP, 20 aa Linear Peptides (PEP20205061690)	10	5	DYFSEETCRDKAYNSLMIEF	0
University of Alberta, PcDBP, 20 aa Linear Peptides (PEP20205061690)	10	6	YFSEETCRDKAYNSLMIEFK	0
University of Alberta, PcDBP, 20 aa Linear Peptides (PEP20205061690)	10	7	FSEETCRDKAYNSLMIEFKE	0
University of Alberta, PcDBP, 20 aa Linear Peptides (PEP20205061690)	10	8	SEETCRDKAYNSLMIEFKEA	0
University of Alberta, PcDBP, 20 aa Linear Peptides (PEP20205061690)	10	9	EETCRDKAYNSLMIEFKEAY	0
University of Alberta, PcDBP, 20 aa Linear Peptides (PEP20205061690)	10	10	ETCRDKAYNSLMIEFKEAYE	0
University of Alberta, PcDBP, 20 aa Linear Peptides (PEP20205061690)	10	11	TCRDKAYNSLMIEFKEAYEV	0
University of Alberta, PcDBP, 20 aa Linear Peptides (PEP20205061690)	10	12	CRDKAYNSLMIEFKEAYEVN	0
University of Alberta, PcDBP, 20 aa Linear Peptides (PEP20205061690)	10	13	RDKAYNSLMIEFKEAYEVNF	0
University of Alberta, PcDBP, 20 aa Linear Peptides (PEP20205061690)	10	14	DKAYNSLMIEFKEAYEVNFE	0
University of Alberta, PcDBP, 20 aa Linear Peptides (PEP20205061690)	10	15	KAYNSLMIEFKEAYEVNFEN	0
University of Alberta, PcDBP, 20 aa Linear Peptides (PEP20205061690)	10	16	AYNSLMIEFKEAYEVNFENV	0
University of Alberta, PcDBP, 20 aa Linear Peptides (PEP20205061690)	10	17	YNSLMIEFKEAYEVNFENVI	0
University of Alberta, PcDBP, 20 aa Linear Peptides (PEP20205061690)	10	18	NSLMIEFKEAYEVNFENVIN	0
University of Alberta, PcDBP, 20 aa Linear Peptides (PEP20205061690)	10	19	SLMIEFKEAYEVNFENVINL	0
University of Alberta, PcDBP, 20 aa Linear Peptides (PEP20205061690)	10	20	LMIEFKEAYEVNFENVINLD	0
University of Alberta, PcDBP, 20 aa Linear Peptides (PEP20205061690)	10	21	MIEFKEAYEVNFENVINLDD	0
University of Alberta, PcDBP, 20 aa Linear Peptides (PEP20205061690)	10	22	IEFKEAYEVNFENVINLDDD	0
University of Alberta, PcDBP, 20 aa Linear Peptides (PEP20205061690)	10	23	EFKEAYEVNFENVINLDDDH	0
University of Alberta, PcDBP, 20 aa Linear Peptides (PEP20205061690)	10	24	FKEAYEVNFENVINLDDDHY	0
University of Alberta, PcDBP, 20 aa Linear Peptides (PEP20205061690)	10	25	KEAYEVNFENVINLDDDHYT	0
University of Alberta, PcDBP, 20 aa Linear Peptides (PEP20205061690)	10	26	EAYEVNFENVINLDDDHYTG	0
University of Alberta, PcDBP, 20 aa Linear Peptides (PEP20205061690)	10	27	AYEVNFENVINLDDDHYTGL	0
University of Alberta, PcDBP, 20 aa Linear Peptides (PEP20205061690)	10	28	YEVNFENVINLDDDHYTGLC	0
University of Alberta, PcDBP, 20 aa Linear Peptides (PEP20205061690)	10	29	EVNFENVINLDDDHYTGLCI	0
University of Alberta, PcDBP, 20 aa Linear Peptides (PEP20205061690)	10	30	VNFENVINLDDDHYTGLCIC	0
University of Alberta, PcDBP, 20 aa Linear Peptides (PEP20205061690)	10	31	NFENVINLDDDHYTGLCICS	0
University of Alberta, PcDBP, 20 aa Linear Peptides (PEP20205061690)	10	32	FENVINLDDDHYTGLCICSS	0
University of Alberta, PcDBP, 20 aa Linear Peptides (PEP20205061690)	10	33	ENVINLDDDHYTGLCICSST	0
University of Alberta, PcDBP, 20 aa Linear Peptides (PEP20205061690)	10	34	NVINLDDDHYTGLCICSSTK	0
University of Alberta, PcDBP, 20 aa Linear Peptides (PEP20205061690)	10	35	VINLDDDHYTGLCICSSTKA	2.5
University of Alberta, PcDBP, 20 aa Linear Peptides (PEP20205061690)	10	36	INLDDDHYTGLCICSSTKAN	0
University of Alberta, PcDBP, 20 aa Linear Peptides (PEP20205061690)	10	37	NLDDDHYTGLCICSSTKANN	0
University of Alberta, PcDBP, 20 aa Linear Peptides (PEP20205061690)	10	38	LDDDHYTGLCICSSTKANNT	0
University of Alberta, PcDBP, 20 aa Linear Peptides (PEP20205061690)	10	39	DDDHYTGLCICSSTKANNTV	0
University of Alberta, PcDBP, 20 aa Linear Peptides (PEP20205061690)	10	40	DDHYTGLCICSSTKANNTVI	0
University of Alberta, PcDBP, 20 aa Linear Peptides (PEP20205061690)	10	41	DHYTGLCICSSTKANNTVIT	0
University of Alberta, PcDBP, 20 aa Linear Peptides (PEP20205061690)	10	42	HYTGLCICSSTKANNTVITN	3
University of Alberta, PcDBP, 20 aa Linear Peptides (PEP20205061690)	10	43	YTGLCICSSTKANNTVITNS	0
University of Alberta, PcDBP, 20 aa Linear Peptides (PEP20205061690)	10	44	TGLCICSSTKANNTVITNSL	0
University of Alberta, PcDBP, 20 aa Linear Peptides (PEP20205061690)	10	45	GLCICSSTKANNTVITNSLN	0
University of Alberta, PcDBP, 20 aa Linear Peptides (PEP20205061690)	10	46	LCICSSTKANNTVITNSLNY	0
University of Alberta, PcDBP, 20 aa Linear Peptides (PEP20205061690)	10	47	CICSSTKANNTVITNSLNYN	0
University of Alberta, PcDBP, 20 aa Linear Peptides (PEP20205061690)	10	48	ICSSTKANNTVITNSLNYNH	12.5
University of Alberta, PcDBP, 20 aa Linear Peptides (PEP20205061690)	10	49	CSSTKANNTVITNSLNYNHA	0
University of Alberta, PcDBP, 20 aa Linear Peptides (PEP20205061690)	10	50	SSTKANNTVITNSLNYNHAI	4
University of Alberta, PcDBP, 20 aa Linear Peptides (PEP20205061690)	10	51	STKANNTVITNSLNYNHAIE	0
University of Alberta, PcDBP, 20 aa Linear Peptides (PEP20205061690)	10	52	TKANNTVITNSLNYNHAIES	0
University of Alberta, PcDBP, 20 aa Linear Peptides (PEP20205061690)	10	53	KANNTVITNSLNYNHAIESG	0
University of Alberta, PcDBP, 20 aa Linear Peptides (PEP20205061690)	10	54	ANNTVITNSLNYNHAIESGS	0
University of Alberta, PcDBP, 20 aa Linear Peptides (PEP20205061690)	10	55	NNTVITNSLNYNHAIESGSG	0
University of Alberta, PcDBP, 20 aa Linear Peptides (PEP20205061690)	10	56	NTVITNSLNYNHAIESGSGS	0
University of Alberta, PcDBP, 20 aa Linear Peptides (PEP20205061690)	10	57	TVITNSLNYNHAIESGSGSG	0
University of Alberta, PcDBP, 20 aa Linear Peptides (PEP20205061690)	10	58	VITNSLNYNHAIESGSGSGS	2
University of Alberta, PcDBP, 20 aa Linear Peptides (PEP20205061690)	10	59	ITNSLNYNHAIESGSGSGSG	0

## Sheet: Mapping Summary
Mapping Summary PcDBP (PEP20205061690) - Mouse IgG1 Monoclonal Antibody 3D10
The mapping summary was generated from the formatted raw data and lists averaged spot intensities and spot-to-spot deviations. Spots with a deviation of >40% were zeroed in the column with the corrected intensity values.
Spot Family	Row	Column	Peptide	Mouse mAb 3D10, 10 µg/ml	Deviation	Deviation [%]	Mouse mAb 3D10, 10 µg/ml (corr.)
University of Alberta, PcDBP, 20 aa Linear Peptides (PEP20205061690)	2	2	GSGSGSGVNYKEYFDKYQIN	25	4	0.16	25
University of Alberta, PcDBP, 20 aa Linear Peptides (PEP20205061690)	2	3	SGSGSGVNYKEYFDKYQINE	15	2	0.133333	15
University of Alberta, PcDBP, 20 aa Linear Peptides (PEP20205061690)	2	4	GSGSGVNYKEYFDKYQINEC	5	1	0.2	5
University of Alberta, PcDBP, 20 aa Linear Peptides (PEP20205061690)	2	5	SGSGVNYKEYFDKYQINECK	12.5	4.5	0.36	12.5
University of Alberta, PcDBP, 20 aa Linear Peptides (PEP20205061690)	2	6	GSGVNYKEYFDKYQINECKQ	3	3	1	0
University of Alberta, PcDBP, 20 aa Linear Peptides (PEP20205061690)	2	7	SGVNYKEYFDKYQINECKQK	24.5	1.5	0.0612245	24.5
University of Alberta, PcDBP, 20 aa Linear Peptides (PEP20205061690)	2	8	GVNYKEYFDKYQINECKQKE	7.75	1.75	0.225806	7.75
University of Alberta, PcDBP, 20 aa Linear Peptides (PEP20205061690)	2	9	VNYKEYFDKYQINECKQKEK	23	4	0.173913	23
University of Alberta, PcDBP, 20 aa Linear Peptides (PEP20205061690)	2	10	NYKEYFDKYQINECKQKEKT	24	1	0.0416667	24
University of Alberta, PcDBP, 20 aa Linear Peptides (PEP20205061690)	2	11	YKEYFDKYQINECKQKEKTE	0	0	0	0
University of Alberta, PcDBP, 20 aa Linear Peptides (PEP20205061690)	2	12	KEYFDKYQINECKQKEKTEI	1	1	1	0
University of Alberta, PcDBP, 20 aa Linear Peptides (PEP20205061690)	2	13	EYFDKYQINECKQKEKTEIH	0	0	0	0
University of Alberta, PcDBP, 20 aa Linear Peptides (PEP20205061690)	2	14	YFDKYQINECKQKEKTEIHA	0	0	0	0
University of Alberta, PcDBP, 20 aa Linear Peptides (PEP20205061690)	2	15	FDKYQINECKQKEKTEIHAW	0	0	0	0
University of Alberta, PcDBP, 20 aa Linear Peptides (PEP20205061690)	2	16	DKYQINECKQKEKTEIHAWV	0	0	0	0
University of Alberta, PcDBP, 20 aa Linear Peptides (PEP20205061690)	2	17	KYQINECKQKEKTEIHAWVC	1	1	1	0
University of Alberta, PcDBP, 20 aa Linear Peptides (PEP20205061690)	2	18	YQINECKQKEKTEIHAWVCD	1	1	1	0
University of Alberta, PcDBP, 20 aa Linear Peptides (PEP20205061690)	2	19	QINECKQKEKTEIHAWVCDE	1	1	1	0
University of Alberta, PcDBP, 20 aa Linear Peptides (PEP20205061690)	2	20	INECKQKEKTEIHAWVCDEK	0	0	0	0
University of Alberta, PcDBP, 20 aa Linear Peptides (PEP20205061690)	2	21	NECKQKEKTEIHAWVCDEKK	0	0	0	0
University of Alberta, PcDBP, 20 aa Linear Peptides (PEP20205061690)	2	22	ECKQKEKTEIHAWVCDEKKQ	0	0	0	0
University of Alberta, PcDBP, 20 aa Linear Peptides (PEP20205061690)	2	23	CKQKEKTEIHAWVCDEKKQN	0	0	0	0
University of Alberta, PcDBP, 20 aa Linear Peptides (PEP20205061690)	2	24	KQKEKTEIHAWVCDEKKQNC	0	0	0	0
University of Alberta, PcDBP, 20 aa Linear Peptides (PEP20205061690)	2	25	QKEKTEIHAWVCDEKKQNCA	0	0	0	0
University of Alberta, PcDBP, 20 aa Linear Peptides (PEP20205061690)	2	26	KEKTEIHAWVCDEKKQNCAP	2.5	2.5	1	0
University of Alberta, PcDBP, 20 aa Linear Peptides (PEP20205061690)	2	27	EKTEIHAWVCDEKKQNCAPS	3	3	1	0
University of Alberta, PcDBP, 20 aa Linear Peptides (PEP20205061690)	2	28	KTEIHAWVCDEKKQNCAPSR	2	2	1	0
University of Alberta, PcDBP, 20 aa Linear Peptides (PEP20205061690)	2	29	TEIHAWVCDEKKQNCAPSRR	5	3	0.6	0
University of Alberta, PcDBP, 20 aa Linear Peptides (PEP20205061690)	2	30	EIHAWVCDEKKQNCAPSRRI	2	2	1	0
University of Alberta, PcDBP, 20 aa Linear Peptides (PEP20205061690)	2	31	IHAWVCDEKKQNCAPSRRIN	0	0	0	0
University of Alberta, PcDBP, 20 aa Linear Peptides (PEP20205061690)	2	32	HAWVCDEKKQNCAPSRRINL	0.5	0.5	1	0
University of Alberta, PcDBP, 20 aa Linear Peptides (PEP20205061690)	2	33	AWVCDEKKQNCAPSRRINLC	9.5	7.5	0.789474	0
University of Alberta, PcDBP, 20 aa Linear Peptides (PEP20205061690)	2	34	WVCDEKKQNCAPSRRINLCT	4.5	1.5	0.333333	4.5
University of Alberta, PcDBP, 20 aa Linear Peptides (PEP20205061690)	2	35	VCDEKKQNCAPSRRINLCTN	0	0	0	0
University of Alberta, PcDBP, 20 aa Linear Peptides (PEP20205061690)	2	36	CDEKKQNCAPSRRINLCTNR	4.5	3.5	0.777778	0
University of Alberta, PcDBP, 20 aa Linear Peptides (PEP20205061690)	2	37	DEKKQNCAPSRRINLCTNRL	7	1	0.142857	7
University of Alberta, PcDBP, 20 aa Linear Peptides (PEP20205061690)	2	38	EKKQNCAPSRRINLCTNRLE	4	0	0	4
University of Alberta, PcDBP, 20 aa Linear Peptides (PEP20205061690)	2	39	KKQNCAPSRRINLCTNRLEI	5.5	5.5	1	0
University of Alberta, PcDBP, 20 aa Linear Peptides (PEP20205061690)	2	40	KQNCAPSRRINLCTNRLEII	1	1	1	0
University of Alberta, PcDBP, 20 aa Linear Peptides (PEP20205061690)	2	41	QNCAPSRRINLCTNRLEIIP	7.5	0.5	0.0666667	7.5
University of Alberta, PcDBP, 20 aa Linear Peptides (PEP20205061690)	2	42	NCAPSRRINLCTNRLEIIPD	4	4	1	0
University of Alberta, PcDBP, 20 aa Linear Peptides (PEP20205061690)	2	43	CAPSRRINLCTNRLEIIPDK	0	0	0	0
University of Alberta, PcDBP, 20 aa Linear Peptides (PEP20205061690)	2	44	APSRRINLCTNRLEIIPDKI	2	2	1	0
University of Alberta, PcDBP, 20 aa Linear Peptides (PEP20205061690)	2	45	PSRRINLCTNRLEIIPDKIE	2	0	0	2
University of Alberta, PcDBP, 20 aa Linear Peptides (PEP20205061690)	2	46	SRRINLCTNRLEIIPDKIEI	0	0	0	0
University of Alberta, PcDBP, 20 aa Linear Peptides (PEP20205061690)	2	47	RRINLCTNRLEIIPDKIEIK	7	1	0.142857	7
University of Alberta, PcDBP, 20 aa Linear Peptides (PEP20205061690)	2	48	RINLCTNRLEIIPDKIEIKD	0	0	0	0
University of Alberta, PcDBP, 20 aa Linear Peptides (PEP20205061690)	2	49	INLCTNRLEIIPDKIEIKDN	1	1	1	0
University of Alberta, PcDBP, 20 aa Linear Peptides (PEP20205061690)	2	50	NLCTNRLEIIPDKIEIKDNE	0	0	0	0
University of Alberta, PcDBP, 20 aa Linear Peptides (PEP20205061690)	2	51	LCTNRLEIIPDKIEIKDNEM	1	1	1	0
University of Alberta, PcDBP, 20 aa Linear Peptides (PEP20205061690)	2	52	CTNRLEIIPDKIEIKDNEMK	0.5	0.5	1	0
University of Alberta, PcDBP, 20 aa Linear Peptides (PEP20205061690)	2	53	TNRLEIIPDKIEIKDNEMKE	0	0	0	0
University of Alberta, PcDBP, 20 aa Linear Peptides (PEP20205061690)	2	54	NRLEIIPDKIEIKDNEMKEL	1	1	1	0
University of Alberta, PcDBP, 20 aa Linear Peptides (PEP20205061690)	2	55	RLEIIPDKIEIKDNEMKELL	0	0	0	0
University of Alberta, PcDBP, 20 aa Linear Peptides (PEP20205061690)	2	56	LEIIPDKIEIKDNEMKELLM	1	1	1	0
University of Alberta, PcDBP, 20 aa Linear Peptides (PEP20205061690)	2	57	EIIPDKIEIKDNEMKELLMD	0	0	0	0
University of Alberta, PcDBP, 20 aa Linear Peptides (PEP20205061690)	2	58	IIPDKIEIKDNEMKELLMDY	1	1	1	0
University of Alberta, PcDBP, 20 aa Linear Peptides (PEP20205061690)	2	59	IPDKIEIKDNEMKELLMDYF	2	2	1	0
University of Alberta, PcDBP, 20 aa Linear Peptides (PEP20205061690)	2	60	PDKIEIKDNEMKELLMDYFK	0	0	0	0
University of Alberta, PcDBP, 20 aa Linear Peptides (PEP20205061690)	2	61	DKIEIKDNEMKELLMDYFKK	0	0	0	0
University of Alberta, PcDBP, 20 aa Linear Peptides (PEP20205061690)	2	62	KIEIKDNEMKELLMDYFKKF	0	0	0	0
University of Alberta, PcDBP, 20 aa Linear Peptides (PEP20205061690)	2	63	IEIKDNEMKELLMDYFKKFI	0	0	0	0
University of Alberta, PcDBP, 20 aa Linear Peptides (PEP20205061690)	2	64	EIKDNEMKELLMDYFKKFIY	0	0	0	0
University of Alberta, PcDBP, 20 aa Linear Peptides (PEP20205061690)	2	65	IKDNEMKELLMDYFKKFIYE	1	1	1	0
University of Alberta, PcDBP, 20 aa Linear Peptides (PEP20205061690)	2	66	KDNEMKELLMDYFKKFIYED	0	0	0	0
University of Alberta, PcDBP, 20 aa Linear Peptides (PEP20205061690)	2	67	DNEMKELLMDYFKKFIYEDA	0	0	0	0
University of Alberta, PcDBP, 20 aa Linear Peptides (PEP20205061690)	4	2	NEMKELLMDYFKKFIYEDAA	0	0	0	0
University of Alberta, PcDBP, 20 aa Linear Peptides (PEP20205061690)	4	3	EMKELLMDYFKKFIYEDAAN	3	0	0	3
University of Alberta, PcDBP, 20 aa Linear Peptides (PEP20205061690)	4	4	MKELLMDYFKKFIYEDAANE	0	0	0	0
University of Alberta, PcDBP, 20 aa Linear Peptides (PEP20205061690)	4	5	KELLMDYFKKFIYEDAANEG	4	4	1	0
University of Alberta, PcDBP, 20 aa Linear Peptides (PEP20205061690)	4	6	ELLMDYFKKFIYEDAANEGK	0	0	0	0
University of Alberta, PcDBP, 20 aa Linear Peptides (PEP20205061690)	4	7	LLMDYFKKFIYEDAANEGKL	0	0	0	0
University of Alberta, PcDBP, 20 aa Linear Peptides (PEP20205061690)	4	8	LMDYFKKFIYEDAANEGKLL	0	0	0	0
University of Alberta, PcDBP, 20 aa Linear Peptides (PEP20205061690)	4	9	MDYFKKFIYEDAANEGKLLL	0	0	0	0
University of Alberta, PcDBP, 20 aa Linear Peptides (PEP20205061690)	4	10	DYFKKFIYEDAANEGKLLLN	0	0	0	0
University of Alberta, PcDBP, 20 aa Linear Peptides (PEP20205061690)	4	11	YFKKFIYEDAANEGKLLLNK	0	0	0	0
University of Alberta, PcDBP, 20 aa Linear Peptides (PEP20205061690)	4	12	FKKFIYEDAANEGKLLLNKY	0	0	0	0
University of Alberta, PcDBP, 20 aa Linear Peptides (PEP20205061690)	4	13	KKFIYEDAANEGKLLLNKYD	0	0	0	0
University of Alberta, PcDBP, 20 aa Linear Peptides (PEP20205061690)	4	14	KFIYEDAANEGKLLLNKYDD	0	0	0	0
University of Alberta, PcDBP, 20 aa Linear Peptides (PEP20205061690)	4	15	FIYEDAANEGKLLLNKYDDK	20	1	0.05	20
University of Alberta, PcDBP, 20 aa Linear Peptides (PEP20205061690)	4	16	IYEDAANEGKLLLNKYDDKN	9.5	1.5	0.157895	9.5
University of Alberta, PcDBP, 20 aa Linear Peptides (PEP20205061690)	4	17	YEDAANEGKLLLNKYDDKNN	1	1	1	0
University of Alberta, PcDBP, 20 aa Linear Peptides (PEP20205061690)	4	18	EDAANEGKLLLNKYDDKNNN	0	0	0	0
University of Alberta, PcDBP, 20 aa Linear Peptides (PEP20205061690)	4	19	DAANEGKLLLNKYDDKNNNE	0	0	0	0
University of Alberta, PcDBP, 20 aa Linear Peptides (PEP20205061690)	4	20	AANEGKLLLNKYDDKNNNEY	6	6	1	0
University of Alberta, PcDBP, 20 aa Linear Peptides (PEP20205061690)	4	21	ANEGKLLLNKYDDKNNNEYC	2	2	1	0
University of Alberta, PcDBP, 20 aa Linear Peptides (PEP20205061690)	4	22	NEGKLLLNKYDDKNNNEYCN	0	0	0	0
University of Alberta, PcDBP, 20 aa Linear Peptides (PEP20205061690)	4	23	EGKLLLNKYDDKNNNEYCND	0	0	0	0
University of Alberta, PcDBP, 20 aa Linear Peptides (PEP20205061690)	4	24	GKLLLNKYDDKNNNEYCNDM	0	0	0	0
University of Alberta, PcDBP, 20 aa Linear Peptides (PEP20205061690)	4	25	KLLLNKYDDKNNNEYCNDMV	1.5	1.5	1	0
University of Alberta, PcDBP, 20 aa Linear Peptides (PEP20205061690)	4	26	LLLNKYDDKNNNEYCNDMVN	0	0	0	0
University of Alberta, PcDBP, 20 aa Linear Peptides (PEP20205061690)	4	27	LLNKYDDKNNNEYCNDMVNS	0	0	0	0
University of Alberta, PcDBP, 20 aa Linear Peptides (PEP20205061690)	4	28	LNKYDDKNNNEYCNDMVNSF	1	1	1	0
University of Alberta, PcDBP, 20 aa Linear Peptides (PEP20205061690)	4	29	NKYDDKNNNEYCNDMVNSFG	5.5	1.5	0.272727	5.5
University of Alberta, PcDBP, 20 aa Linear Peptides (PEP20205061690)	4	30	KYDDKNNNEYCNDMVNSFGD	0	0	0	0
University of Alberta, PcDBP, 20 aa Linear Peptides (PEP20205061690)	4	31	YDDKNNNEYCNDMVNSFGDY	0	0	0	0
University of Alberta, PcDBP, 20 aa Linear Peptides (PEP20205061690)	4	32	DDKNNNEYCNDMVNSFGDYK	5.25	4.25	0.809524	0
University of Alberta, PcDBP, 20 aa Linear Peptides (PEP20205061690)	4	33	DKNNNEYCNDMVNSFGDYKN	3	3	1	0
University of Alberta, PcDBP, 20 aa Linear Peptides (PEP20205061690)	4	34	KNNNEYCNDMVNSFGDYKNI	6	0	0	6
University of Alberta, PcDBP, 20 aa Linear Peptides (PEP20205061690)	4	35	NNNEYCNDMVNSFGDYKNIV	7.5	5.5	0.733333	0
University of Alberta, PcDBP, 20 aa Linear Peptides (PEP20205061690)	4	36	NNEYCNDMVNSFGDYKNIVE	4	4	1	0
University of Alberta, PcDBP, 20 aa Linear Peptides (PEP20205061690)	4	37	NEYCNDMVNSFGDYKNIVEG	2	2	1	0
University of Alberta, PcDBP, 20 aa Linear Peptides (PEP20205061690)	4	38	EYCNDMVNSFGDYKNIVEGT	0	0	0	0
University of Alberta, PcDBP, 20 aa Linear Peptides (PEP20205061690)	4	39	YCNDMVNSFGDYKNIVEGTG	1	1	1	0
University of Alberta, PcDBP, 20 aa Linear Peptides (PEP20205061690)	4	40	CNDMVNSFGDYKNIVEGTGL	10.5	6.5	0.619048	0
University of Alberta, PcDBP, 20 aa Linear Peptides (PEP20205061690)	4	41	NDMVNSFGDYKNIVEGTGLK	14	3	0.214286	14
University of Alberta, PcDBP, 20 aa Linear Peptides (PEP20205061690)	4	42	DMVNSFGDYKNIVEGTGLKN	5	1	0.2	5
University of Alberta, PcDBP, 20 aa Linear Peptides (PEP20205061690)	4	43	MVNSFGDYKNIVEGTGLKNV	6.5	4.5	0.692308	0
University of Alberta, PcDBP, 20 aa Linear Peptides (PEP20205061690)	4	44	VNSFGDYKNIVEGTGLKNVA	1.5	1.5	1	0
University of Alberta, PcDBP, 20 aa Linear Peptides (PEP20205061690)	4	45	NSFGDYKNIVEGTGLKNVAN	2	0	0	2
University of Alberta, PcDBP, 20 aa Linear Peptides (PEP20205061690)	4	46	SFGDYKNIVEGTGLKNVANE	2	2	1	0
University of Alberta, PcDBP, 20 aa Linear Peptides (PEP20205061690)	4	47	FGDYKNIVEGTGLKNVANEN	0	0	0	0
University of Alberta, PcDBP, 20 aa Linear Peptides (PEP20205061690)	4	48	GDYKNIVEGTGLKNVANENL	4.75	4.75	1	0
University of Alberta, PcDBP, 20 aa Linear Peptides (PEP20205061690)	4	49	DYKNIVEGTGLKNVANENLL	5.5	5.5	1	0
University of Alberta, PcDBP, 20 aa Linear Peptides (PEP20205061690)	4	50	YKNIVEGTGLKNVANENLLE	2.5	2.5	1	0
University of Alberta, PcDBP, 20 aa Linear Peptides (PEP20205061690)	4	51	KNIVEGTGLKNVANENLLEL	1	1	1	0
University of Alberta, PcDBP, 20 aa Linear Peptides (PEP20205061690)	4	52	NIVEGTGLKNVANENLLELK	3	3	1	0
University of Alberta, PcDBP, 20 aa Linear Peptides (PEP20205061690)	4	53	IVEGTGLKNVANENLLELKI	1	1	1	0
University of Alberta, PcDBP, 20 aa Linear Peptides (PEP20205061690)	4	54	VEGTGLKNVANENLLELKIQ	5.5	1.5	0.272727	5.5
University of Alberta, PcDBP, 20 aa Linear Peptides (PEP20205061690)	4	55	EGTGLKNVANENLLELKIQN	0	0	0	0
University of Alberta, PcDBP, 20 aa Linear Peptides (PEP20205061690)	4	56	GTGLKNVANENLLELKIQNI	2	2	1	0
University of Alberta, PcDBP, 20 aa Linear Peptides (PEP20205061690)	4	57	TGLKNVANENLLELKIQNIF	2	2	1	0
University of Alberta, PcDBP, 20 aa Linear Peptides (PEP20205061690)	4	58	GLKNVANENLLELKIQNIFG	3	3	1	0
University of Alberta, PcDBP, 20 aa Linear Peptides (PEP20205061690)	4	59	LKNVANENLLELKIQNIFGT	2	2	1	0
University of Alberta, PcDBP, 20 aa Linear Peptides (PEP20205061690)	4	60	KNVANENLLELKIQNIFGTD	0	0	0	0
University of Alberta, PcDBP, 20 aa Linear Peptides (PEP20205061690)	4	61	NVANENLLELKIQNIFGTDD	5.5	5.5	1	0
University of Alberta, PcDBP, 20 aa Linear Peptides (PEP20205061690)	4	62	VANENLLELKIQNIFGTDDN	0	0	0	0
University of Alberta, PcDBP, 20 aa Linear Peptides (PEP20205061690)	4	63	ANENLLELKIQNIFGTDDNA	0	0	0	0
University of Alberta, PcDBP, 20 aa Linear Peptides (PEP20205061690)	4	64	NENLLELKIQNIFGTDDNAK	0	0	0	0
University of Alberta, PcDBP, 20 aa Linear Peptides (PEP20205061690)	4	65	ENLLELKIQNIFGTDDNAKR	0	0	0	0
University of Alberta, PcDBP, 20 aa Linear Peptides (PEP20205061690)	4	66	NLLELKIQNIFGTDDNAKRD	0	0	0	0
University of Alberta, PcDBP, 20 aa Linear Peptides (PEP20205061690)	4	67	LLELKIQNIFGTDDNAKRDR	1	1	1	0
University of Alberta, PcDBP, 20 aa Linear Peptides (PEP20205061690)	6	2	LELKIQNIFGTDDNAKRDRK	33.5	4.5	0.134328	33.5
University of Alberta, PcDBP, 20 aa Linear Peptides (PEP20205061690)	6	3	ELKIQNIFGTDDNAKRDRKI	379.5	51.5	0.135705	379.5
University of Alberta, PcDBP, 20 aa Linear Peptides (PEP20205061690)	6	4	LKIQNIFGTDDNAKRDRKIW	36	2	0.0555556	36
University of Alberta, PcDBP, 20 aa Linear Peptides (PEP20205061690)	6	5	KIQNIFGTDDNAKRDRKIWW	16.5	1.5	0.0909091	16.5
University of Alberta, PcDBP, 20 aa Linear Peptides (PEP20205061690)	6	6	IQNIFGTDDNAKRDRKIWWK	20.5	2.5	0.121951	20.5
University of Alberta, PcDBP, 20 aa Linear Peptides (PEP20205061690)	6	7	QNIFGTDDNAKRDRKIWWKR	14	0	0	14
University of Alberta, PcDBP, 20 aa Linear Peptides (PEP20205061690)	6	8	NIFGTDDNAKRDRKIWWKRH	9.5	7.5	0.789474	0
University of Alberta, PcDBP, 20 aa Linear Peptides (PEP20205061690)	6	9	IFGTDDNAKRDRKIWWKRHE	0.5	0.5	1	0
University of Alberta, PcDBP, 20 aa Linear Peptides (PEP20205061690)	6	10	FGTDDNAKRDRKIWWKRHEN	0	0	0	0
University of Alberta, PcDBP, 20 aa Linear Peptides (PEP20205061690)	6	11	GTDDNAKRDRKIWWKRHENI	2	2	1	0
University of Alberta, PcDBP, 20 aa Linear Peptides (PEP20205061690)	6	12	TDDNAKRDRKIWWKRHENII	0	0	0	0
University of Alberta, PcDBP, 20 aa Linear Peptides (PEP20205061690)	6	13	DDNAKRDRKIWWKRHENIIW	0	0	0	0
University of Alberta, PcDBP, 20 aa Linear Peptides (PEP20205061690)	6	14	DNAKRDRKIWWKRHENIIWK	0	0	0	0
University of Alberta, PcDBP, 20 aa Linear Peptides (PEP20205061690)	6	15	NAKRDRKIWWKRHENIIWKA	0	0	0	0
University of Alberta, PcDBP, 20 aa Linear Peptides (PEP20205061690)	6	16	AKRDRKIWWKRHENIIWKAM	0	0	0	0
University of Alberta, PcDBP, 20 aa Linear Peptides (PEP20205061690)	6	17	KRDRKIWWKRHENIIWKAMV	0	0	0	0
University of Alberta, PcDBP, 20 aa Linear Peptides (PEP20205061690)	6	18	RDRKIWWKRHENIIWKAMVL	0	0	0	0
University of Alberta, PcDBP, 20 aa Linear Peptides (PEP20205061690)	6	19	DRKIWWKRHENIIWKAMVLG	2	2	1	0
University of Alberta, PcDBP, 20 aa Linear Peptides (PEP20205061690)	6	20	RKIWWKRHENIIWKAMVLGK	2	2	1	0
University of Alberta, PcDBP, 20 aa Linear Peptides (PEP20205061690)	6	21	KIWWKRHENIIWKAMVLGKD	0	0	0	0
University of Alberta, PcDBP, 20 aa Linear Peptides (PEP20205061690)	6	22	IWWKRHENIIWKAMVLGKDF	6	1	0.166667	6
University of Alberta, PcDBP, 20 aa Linear Peptides (PEP20205061690)	6	23	WWKRHENIIWKAMVLGKDFN	1	1	1	0
University of Alberta, PcDBP, 20 aa Linear Peptides (PEP20205061690)	6	24	WKRHENIIWKAMVLGKDFNE	0	0	0	0
University of Alberta, PcDBP, 20 aa Linear Peptides (PEP20205061690)	6	25	KRHENIIWKAMVLGKDFNEA	0	0	0	0
University of Alberta, PcDBP, 20 aa Linear Peptides (PEP20205061690)	6	26	RHENIIWKAMVLGKDFNEAS	0	0	0	0
University of Alberta, PcDBP, 20 aa Linear Peptides (PEP20205061690)	6	27	HENIIWKAMVLGKDFNEASN	0	0	0	0
University of Alberta, PcDBP, 20 aa Linear Peptides (PEP20205061690)	6	28	ENIIWKAMVLGKDFNEASNY	1	1	1	0
University of Alberta, PcDBP, 20 aa Linear Peptides (PEP20205061690)	6	29	NIIWKAMVLGKDFNEASNYE	1	1	1	0
University of Alberta, PcDBP, 20 aa Linear Peptides (PEP20205061690)	6	30	IIWKAMVLGKDFNEASNYEN	0	0	0	0
University of Alberta, PcDBP, 20 aa Linear Peptides (PEP20205061690)	6	31	IWKAMVLGKDFNEASNYENI	0	0	0	0
University of Alberta, PcDBP, 20 aa Linear Peptides (PEP20205061690)	6	32	WKAMVLGKDFNEASNYENIC	7	7	1	0
University of Alberta, PcDBP, 20 aa Linear Peptides (PEP20205061690)	6	33	KAMVLGKDFNEASNYENICT	8.75	0.75	0.0857143	8.75
University of Alberta, PcDBP, 20 aa Linear Peptides (PEP20205061690)	6	34	AMVLGKDFNEASNYENICTN	8.5	2.5	0.294118	8.5
University of Alberta, PcDBP, 20 aa Linear Peptides (PEP20205061690)	6	35	MVLGKDFNEASNYENICTNY	4.75	4.75	1	0
University of Alberta, PcDBP, 20 aa Linear Peptides (PEP20205061690)	6	36	VLGKDFNEASNYENICTNYK	4	4	1	0
University of Alberta, PcDBP, 20 aa Linear Peptides (PEP20205061690)	6	37	LGKDFNEASNYENICTNYKL	18	7	0.388889	18
University of Alberta, PcDBP, 20 aa Linear Peptides (PEP20205061690)	6	38	GKDFNEASNYENICTNYKLE	2	2	1	0
University of Alberta, PcDBP, 20 aa Linear Peptides (PEP20205061690)	6	39	KDFNEASNYENICTNYKLED	4	4	1	0
University of Alberta, PcDBP, 20 aa Linear Peptides (PEP20205061690)	6	40	DFNEASNYENICTNYKLEDH	2	0	0	2
University of Alberta, PcDBP, 20 aa Linear Peptides (PEP20205061690)	6	41	FNEASNYENICTNYKLEDHH	4	2	0.5	0
University of Alberta, PcDBP, 20 aa Linear Peptides (PEP20205061690)	6	42	NEASNYENICTNYKLEDHHS	8	8	1	0
University of Alberta, PcDBP, 20 aa Linear Peptides (PEP20205061690)	6	43	EASNYENICTNYKLEDHHSQ	16.25	6.75	0.415385	0
University of Alberta, PcDBP, 20 aa Linear Peptides (PEP20205061690)	6	44	ASNYENICTNYKLEDHHSQI	12	5	0.416667	0
University of Alberta, PcDBP, 20 aa Linear Peptides (PEP20205061690)	6	45	SNYENICTNYKLEDHHSQIE	0	0	0	0
University of Alberta, PcDBP, 20 aa Linear Peptides (PEP20205061690)	6	46	NYENICTNYKLEDHHSQIER	13	2	0.153846	13
University of Alberta, PcDBP, 20 aa Linear Peptides (PEP20205061690)	6	47	YENICTNYKLEDHHSQIERW	12.5	0.5	0.04	12.5
University of Alberta, PcDBP, 20 aa Linear Peptides (PEP20205061690)	6	48	ENICTNYKLEDHHSQIERWA	8.5	4.5	0.529412	0
University of Alberta, PcDBP, 20 aa Linear Peptides (PEP20205061690)	6	49	NICTNYKLEDHHSQIERWAR	11.5	7.5	0.652174	0
University of Alberta, PcDBP, 20 aa Linear Peptides (PEP20205061690)	6	50	ICTNYKLEDHHSQIERWARE	11.5	3.5	0.304348	11.5
University of Alberta, PcDBP, 20 aa Linear Peptides (PEP20205061690)	6	51	CTNYKLEDHHSQIERWAREW	13.5	0.5	0.037037	13.5
University of Alberta, PcDBP, 20 aa Linear Peptides (PEP20205061690)	6	52	TNYKLEDHHSQIERWAREWI	17	0	0	17
University of Alberta, PcDBP, 20 aa Linear Peptides (PEP20205061690)	6	53	NYKLEDHHSQIERWAREWIQ	9.5	1.5	0.157895	9.5
University of Alberta, PcDBP, 20 aa Linear Peptides (PEP20205061690)	6	54	YKLEDHHSQIERWAREWIQE	6	1	0.166667	6
University of Alberta, PcDBP, 20 aa Linear Peptides (PEP20205061690)	6	55	KLEDHHSQIERWAREWIQEF	6.5	1.5	0.230769	6.5
University of Alberta, PcDBP, 20 aa Linear Peptides (PEP20205061690)	6	56	LEDHHSQIERWAREWIQEFS	0	0	0	0
University of Alberta, PcDBP, 20 aa Linear Peptides (PEP20205061690)	6	57	EDHHSQIERWAREWIQEFSV	0	0	0	0
University of Alberta, PcDBP, 20 aa Linear Peptides (PEP20205061690)	6	58	DHHSQIERWAREWIQEFSVQ	0	0	0	0
University of Alberta, PcDBP, 20 aa Linear Peptides (PEP20205061690)	6	59	HHSQIERWAREWIQEFSVQY	2	2	1	0
University of Alberta, PcDBP, 20 aa Linear Peptides (PEP20205061690)	6	60	HSQIERWAREWIQEFSVQYF	3	3	1	0
University of Alberta, PcDBP, 20 aa Linear Peptides (PEP20205061690)	6	61	SQIERWAREWIQEFSVQYFK	0	0	0	0
University of Alberta, PcDBP, 20 aa Linear Peptides (PEP20205061690)	6	62	QIERWAREWIQEFSVQYFKE	0	0	0	0
University of Alberta, PcDBP, 20 aa Linear Peptides (PEP20205061690)	6	63	IERWAREWIQEFSVQYFKEA	0	0	0	0
University of Alberta, PcDBP, 20 aa Linear Peptides (PEP20205061690)	6	64	ERWAREWIQEFSVQYFKEAN	0	0	0	0
University of Alberta, PcDBP, 20 aa Linear Peptides (PEP20205061690)	6	65	RWAREWIQEFSVQYFKEANK	0	0	0	0
University of Alberta, PcDBP, 20 aa Linear Peptides (PEP20205061690)	6	66	WAREWIQEFSVQYFKEANKI	2	2	1	0
University of Alberta, PcDBP, 20 aa Linear Peptides (PEP20205061690)	6	67	AREWIQEFSVQYFKEANKIN	0	0	0	0
University of Alberta, PcDBP, 20 aa Linear Peptides (PEP20205061690)	8	2	REWIQEFSVQYFKEANKINN	0	0	0	0
University of Alberta, PcDBP, 20 aa Linear Peptides (PEP20205061690)	8	3	EWIQEFSVQYFKEANKINNK	7.5	7.5	1	0
University of Alberta, PcDBP, 20 aa Linear Peptides (PEP20205061690)	8	4	WIQEFSVQYFKEANKINNKC	0	0	0	0
University of Alberta, PcDBP, 20 aa Linear Peptides (PEP20205061690)	8	5	IQEFSVQYFKEANKINNKCI	0	0	0	0
University of Alberta, PcDBP, 20 aa Linear Peptides (PEP20205061690)	8	6	QEFSVQYFKEANKINNKCIK	12.5	12.5	1	0
University of Alberta, PcDBP, 20 aa Linear Peptides (PEP20205061690)	8	7	EFSVQYFKEANKINNKCIKK	89.75	43.75	0.487465	89.75
University of Alberta, PcDBP, 20 aa Linear Peptides (PEP20205061690)	8	8	FSVQYFKEANKINNKCIKKS	204.5	2.5	0.0122249	204.5
University of Alberta, PcDBP, 20 aa Linear Peptides (PEP20205061690)	8	9	SVQYFKEANKINNKCIKKSN	79.5	0.5	0.00628931	79.5
University of Alberta, PcDBP, 20 aa Linear Peptides (PEP20205061690)	8	10	VQYFKEANKINNKCIKKSNI	55.5	15.5	0.279279	55.5
University of Alberta, PcDBP, 20 aa Linear Peptides (PEP20205061690)	8	11	QYFKEANKINNKCIKKSNIF	9.5	9.5	1	0
University of Alberta, PcDBP, 20 aa Linear Peptides (PEP20205061690)	8	12	YFKEANKINNKCIKKSNIFT	10.5	10.5	1	0
University of Alberta, PcDBP, 20 aa Linear Peptides (PEP20205061690)	8	13	FKEANKINNKCIKKSNIFTE	5.5	5.5	1	0
University of Alberta, PcDBP, 20 aa Linear Peptides (PEP20205061690)	8	14	KEANKINNKCIKKSNIFTES	0	0	0	0
University of Alberta, PcDBP, 20 aa Linear Peptides (PEP20205061690)	8	15	EANKINNKCIKKSNIFTESI	0	0	0	0
University of Alberta, PcDBP, 20 aa Linear Peptides (PEP20205061690)	8	16	ANKINNKCIKKSNIFTESIC	0	0	0	0
University of Alberta, PcDBP, 20 aa Linear Peptides (PEP20205061690)	8	17	NKINNKCIKKSNIFTESICT	0	0	0	0
University of Alberta, PcDBP, 20 aa Linear Peptides (PEP20205061690)	8	18	KINNKCIKKSNIFTESICTD	0	0	0	0
University of Alberta, PcDBP, 20 aa Linear Peptides (PEP20205061690)	8	19	INNKCIKKSNIFTESICTDN	0	0	0	0
University of Alberta, PcDBP, 20 aa Linear Peptides (PEP20205061690)	8	20	NNKCIKKSNIFTESICTDNN	0	0	0	0
University of Alberta, PcDBP, 20 aa Linear Peptides (PEP20205061690)	8	21	NKCIKKSNIFTESICTDNNC	0	0	0	0
University of Alberta, PcDBP, 20 aa Linear Peptides (PEP20205061690)	8	22	KCIKKSNIFTESICTDNNCK	3	3	1	0
University of Alberta, PcDBP, 20 aa Linear Peptides (PEP20205061690)	8	23	CIKKSNIFTESICTDNNCKT	2	0	0	2
University of Alberta, PcDBP, 20 aa Linear Peptides (PEP20205061690)	8	24	IKKSNIFTESICTDNNCKTA	0	0	0	0
University of Alberta, PcDBP, 20 aa Linear Peptides (PEP20205061690)	8	25	KKSNIFTESICTDNNCKTAC	1	1	1	0
University of Alberta, PcDBP, 20 aa Linear Peptides (PEP20205061690)	8	26	KSNIFTESICTDNNCKTACN	0	0	0	0
University of Alberta, PcDBP, 20 aa Linear Peptides (PEP20205061690)	8	27	SNIFTESICTDNNCKTACNA	0	0	0	0
University of Alberta, PcDBP, 20 aa Linear Peptides (PEP20205061690)	8	28	NIFTESICTDNNCKTACNAY	0	0	0	0
University of Alberta, PcDBP, 20 aa Linear Peptides (PEP20205061690)	8	29	IFTESICTDNNCKTACNAYE	0	0	0	0
University of Alberta, PcDBP, 20 aa Linear Peptides (PEP20205061690)	8	30	FTESICTDNNCKTACNAYET	0	0	0	0
University of Alberta, PcDBP, 20 aa Linear Peptides (PEP20205061690)	8	31	TESICTDNNCKTACNAYETW	3.5	3.5	1	0
University of Alberta, PcDBP, 20 aa Linear Peptides (PEP20205061690)	8	32	ESICTDNNCKTACNAYETWI	7	1	0.142857	7
University of Alberta, PcDBP, 20 aa Linear Peptides (PEP20205061690)	8	33	SICTDNNCKTACNAYETWIN	1	1	1	0
University of Alberta, PcDBP, 20 aa Linear Peptides (PEP20205061690)	8	34	ICTDNNCKTACNAYETWINV	4.75	4.75	1	0
University of Alberta, PcDBP, 20 aa Linear Peptides (PEP20205061690)	8	35	CTDNNCKTACNAYETWINVN	0	0	0	0
University of Alberta, PcDBP, 20 aa Linear Peptides (PEP20205061690)	8	36	TDNNCKTACNAYETWINVNK	5	3	0.6	0
University of Alberta, PcDBP, 20 aa Linear Peptides (PEP20205061690)	8	37	DNNCKTACNAYETWINVNKS	2.5	1.5	0.6	0
University of Alberta, PcDBP, 20 aa Linear Peptides (PEP20205061690)	8	38	NNCKTACNAYETWINVNKSK	8.5	2.5	0.294118	8.5
University of Alberta, PcDBP, 20 aa Linear Peptides (PEP20205061690)	8	39	NCKTACNAYETWINVNKSKW	6.5	6.5	1	0
University of Alberta, PcDBP, 20 aa Linear Peptides (PEP20205061690)	8	40	CKTACNAYETWINVNKSKWN	4.5	0.5	0.111111	4.5
University of Alberta, PcDBP, 20 aa Linear Peptides (PEP20205061690)	8	41	KTACNAYETWINVNKSKWNT	7.5	7.5	1	0
University of Alberta, PcDBP, 20 aa Linear Peptides (PEP20205061690)	8	42	TACNAYETWINVNKSKWNTL	14.5	2.5	0.172414	14.5
University of Alberta, PcDBP, 20 aa Linear Peptides (PEP20205061690)	8	43	ACNAYETWINVNKSKWNTLL	14	1	0.0714286	14
University of Alberta, PcDBP, 20 aa Linear Peptides (PEP20205061690)	8	44	CNAYETWINVNKSKWNTLLK	8.25	1.25	0.151515	8.25
University of Alberta, PcDBP, 20 aa Linear Peptides (PEP20205061690)	8	45	NAYETWINVNKSKWNTLLKS	14.5	2.5	0.172414	14.5
University of Alberta, PcDBP, 20 aa Linear Peptides (PEP20205061690)	8	46	AYETWINVNKSKWNTLLKSF	1	1	1	0
University of Alberta, PcDBP, 20 aa Linear Peptides (PEP20205061690)	8	47	YETWINVNKSKWNTLLKSFA	0	0	0	0
University of Alberta, PcDBP, 20 aa Linear Peptides (PEP20205061690)	8	48	ETWINVNKSKWNTLLKSFAN	2	2	1	0
University of Alberta, PcDBP, 20 aa Linear Peptides (PEP20205061690)	8	49	TWINVNKSKWNTLLKSFANF	6.75	2.75	0.407407	0
University of Alberta, PcDBP, 20 aa Linear Peptides (PEP20205061690)	8	50	WINVNKSKWNTLLKSFANFK	6.5	6.5	1	0
University of Alberta, PcDBP, 20 aa Linear Peptides (PEP20205061690)	8	51	INVNKSKWNTLLKSFANFKT	8.75	0.75	0.0857143	8.75
University of Alberta, PcDBP, 20 aa Linear Peptides (PEP20205061690)	8	52	NVNKSKWNTLLKSFANFKTD	7	1	0.142857	7
University of Alberta, PcDBP, 20 aa Linear Peptides (PEP20205061690)	8	53	VNKSKWNTLLKSFANFKTDY	0	0	0	0
University of Alberta, PcDBP, 20 aa Linear Peptides (PEP20205061690)	8	54	NKSKWNTLLKSFANFKTDYF	0	0	0	0
University of Alberta, PcDBP, 20 aa Linear Peptides (PEP20205061690)	8	55	KSKWNTLLKSFANFKTDYFS	1	1	1	0
University of Alberta, PcDBP, 20 aa Linear Peptides (PEP20205061690)	8	56	SKWNTLLKSFANFKTDYFSE	2	2	1	0
University of Alberta, PcDBP, 20 aa Linear Peptides (PEP20205061690)	8	57	KWNTLLKSFANFKTDYFSEE	0	0	0	0
University of Alberta, PcDBP, 20 aa Linear Peptides (PEP20205061690)	8	58	WNTLLKSFANFKTDYFSEET	0.5	0.5	1	0
University of Alberta, PcDBP, 20 aa Linear Peptides (PEP20205061690)	8	59	NTLLKSFANFKTDYFSEETC	0	0	0	0
University of Alberta, PcDBP, 20 aa Linear Peptides (PEP20205061690)	8	60	TLLKSFANFKTDYFSEETCR	5.5	5.5	1	0
University of Alberta, PcDBP, 20 aa Linear Peptides (PEP20205061690)	8	61	LLKSFANFKTDYFSEETCRD	0	0	0	0
University of Alberta, PcDBP, 20 aa Linear Peptides (PEP20205061690)	8	62	LKSFANFKTDYFSEETCRDK	0	0	0	0
University of Alberta, PcDBP, 20 aa Linear Peptides (PEP20205061690)	8	63	KSFANFKTDYFSEETCRDKA	0	0	0	0
University of Alberta, PcDBP, 20 aa Linear Peptides (PEP20205061690)	8	64	SFANFKTDYFSEETCRDKAY	0	0	0	0
University of Alberta, PcDBP, 20 aa Linear Peptides (PEP20205061690)	8	65	FANFKTDYFSEETCRDKAYN	0	0	0	0
University of Alberta, PcDBP, 20 aa Linear Peptides (PEP20205061690)	8	66	ANFKTDYFSEETCRDKAYNS	0	0	0	0
University of Alberta, PcDBP, 20 aa Linear Peptides (PEP20205061690)	8	67	NFKTDYFSEETCRDKAYNSL	0	0	0	0
University of Alberta, PcDBP, 20 aa Linear Peptides (PEP20205061690)	10	2	FKTDYFSEETCRDKAYNSLM	0	0	0	0
University of Alberta, PcDBP, 20 aa Linear Peptides (PEP20205061690)	10	3	KTDYFSEETCRDKAYNSLMI	0	0	0	0
University of Alberta, PcDBP, 20 aa Linear Peptides (PEP20205061690)	10	4	TDYFSEETCRDKAYNSLMIE	2	2	1	0
University of Alberta, PcDBP, 20 aa Linear Peptides (PEP20205061690)	10	5	DYFSEETCRDKAYNSLMIEF	1	1	1	0
University of Alberta, PcDBP, 20 aa Linear Peptides (PEP20205061690)	10	6	YFSEETCRDKAYNSLMIEFK	0	0	0	0
University of Alberta, PcDBP, 20 aa Linear Peptides (PEP20205061690)	10	7	FSEETCRDKAYNSLMIEFKE	0	0	0	0
University of Alberta, PcDBP, 20 aa Linear Peptides (PEP20205061690)	10	8	SEETCRDKAYNSLMIEFKEA	0	0	0	0
University of Alberta, PcDBP, 20 aa Linear Peptides (PEP20205061690)	10	9	EETCRDKAYNSLMIEFKEAY	0	0	0	0
University of Alberta, PcDBP, 20 aa Linear Peptides (PEP20205061690)	10	10	ETCRDKAYNSLMIEFKEAYE	0	0	0	0
University of Alberta, PcDBP, 20 aa Linear Peptides (PEP20205061690)	10	11	TCRDKAYNSLMIEFKEAYEV	0	0	0	0
University of Alberta, PcDBP, 20 aa Linear Peptides (PEP20205061690)	10	12	CRDKAYNSLMIEFKEAYEVN	0	0	0	0
University of Alberta, PcDBP, 20 aa Linear Peptides (PEP20205061690)	10	13	RDKAYNSLMIEFKEAYEVNF	0	0	0	0
University of Alberta, PcDBP, 20 aa Linear Peptides (PEP20205061690)	10	14	DKAYNSLMIEFKEAYEVNFE	0	0	0	0
University of Alberta, PcDBP, 20 aa Linear Peptides (PEP20205061690)	10	15	KAYNSLMIEFKEAYEVNFEN	0	0	0	0
University of Alberta, PcDBP, 20 aa Linear Peptides (PEP20205061690)	10	16	AYNSLMIEFKEAYEVNFENV	0	0	0	0
University of Alberta, PcDBP, 20 aa Linear Peptides (PEP20205061690)	10	17	YNSLMIEFKEAYEVNFENVI	0	0	0	0
University of Alberta, PcDBP, 20 aa Linear Peptides (PEP20205061690)	10	18	NSLMIEFKEAYEVNFENVIN	0	0	0	0
University of Alberta, PcDBP, 20 aa Linear Peptides (PEP20205061690)	10	19	SLMIEFKEAYEVNFENVINL	0	0	0	0
University of Alberta, PcDBP, 20 aa Linear Peptides (PEP20205061690)	10	20	LMIEFKEAYEVNFENVINLD	1	1	1	0
University of Alberta, PcDBP, 20 aa Linear Peptides (PEP20205061690)	10	21	MIEFKEAYEVNFENVINLDD	0	0	0	0
University of Alberta, PcDBP, 20 aa Linear Peptides (PEP20205061690)	10	22	IEFKEAYEVNFENVINLDDD	0	0	0	0
University of Alberta, PcDBP, 20 aa Linear Peptides (PEP20205061690)	10	23	EFKEAYEVNFENVINLDDDH	0	0	0	0
University of Alberta, PcDBP, 20 aa Linear Peptides (PEP20205061690)	10	24	FKEAYEVNFENVINLDDDHY	5.75	3.75	0.652174	0
University of Alberta, PcDBP, 20 aa Linear Peptides (PEP20205061690)	10	25	KEAYEVNFENVINLDDDHYT	6	5	0.833333	0
University of Alberta, PcDBP, 20 aa Linear Peptides (PEP20205061690)	10	26	EAYEVNFENVINLDDDHYTG	4	4	1	0
University of Alberta, PcDBP, 20 aa Linear Peptides (PEP20205061690)	10	27	AYEVNFENVINLDDDHYTGL	14.5	6.5	0.448276	0
University of Alberta, PcDBP, 20 aa Linear Peptides (PEP20205061690)	10	28	YEVNFENVINLDDDHYTGLC	5.75	3.75	0.652174	0
University of Alberta, PcDBP, 20 aa Linear Peptides (PEP20205061690)	10	29	EVNFENVINLDDDHYTGLCI	0	0	0	0
University of Alberta, PcDBP, 20 aa Linear Peptides (PEP20205061690)	10	30	VNFENVINLDDDHYTGLCIC	1	1	1	0
University of Alberta, PcDBP, 20 aa Linear Peptides (PEP20205061690)	10	31	NFENVINLDDDHYTGLCICS	0	0	0	0
University of Alberta, PcDBP, 20 aa Linear Peptides (PEP20205061690)	10	32	FENVINLDDDHYTGLCICSS	0	0	0	0
University of Alberta, PcDBP, 20 aa Linear Peptides (PEP20205061690)	10	33	ENVINLDDDHYTGLCICSST	3	2	0.666667	0
University of Alberta, PcDBP, 20 aa Linear Peptides (PEP20205061690)	10	34	NVINLDDDHYTGLCICSSTK	1	1	1	0
University of Alberta, PcDBP, 20 aa Linear Peptides (PEP20205061690)	10	35	VINLDDDHYTGLCICSSTKA	2.5	0.5	0.2	2.5
University of Alberta, PcDBP, 20 aa Linear Peptides (PEP20205061690)	10	36	INLDDDHYTGLCICSSTKAN	0	0	0	0
University of Alberta, PcDBP, 20 aa Linear Peptides (PEP20205061690)	10	37	NLDDDHYTGLCICSSTKANN	0	0	0	0
University of Alberta, PcDBP, 20 aa Linear Peptides (PEP20205061690)	10	38	LDDDHYTGLCICSSTKANNT	1.5	1.5	1	0
University of Alberta, PcDBP, 20 aa Linear Peptides (PEP20205061690)	10	39	DDDHYTGLCICSSTKANNTV	3	3	1	0
University of Alberta, PcDBP, 20 aa Linear Peptides (PEP20205061690)	10	40	DDHYTGLCICSSTKANNTVI	1	1	1	0
University of Alberta, PcDBP, 20 aa Linear Peptides (PEP20205061690)	10	41	DHYTGLCICSSTKANNTVIT	1	1	1	0
University of Alberta, PcDBP, 20 aa Linear Peptides (PEP20205061690)	10	42	HYTGLCICSSTKANNTVITN	3	1	0.333333	3
University of Alberta, PcDBP, 20 aa Linear Peptides (PEP20205061690)	10	43	YTGLCICSSTKANNTVITNS	5.5	2.5	0.454545	0
University of Alberta, PcDBP, 20 aa Linear Peptides (PEP20205061690)	10	44	TGLCICSSTKANNTVITNSL	2	2	1	0
University of Alberta, PcDBP, 20 aa Linear Peptides (PEP20205061690)	10	45	GLCICSSTKANNTVITNSLN	0	0	0	0
University of Alberta, PcDBP, 20 aa Linear Peptides (PEP20205061690)	10	46	LCICSSTKANNTVITNSLNY	2.5	1.5	0.6	0
University of Alberta, PcDBP, 20 aa Linear Peptides (PEP20205061690)	10	47	CICSSTKANNTVITNSLNYN	0	0	0	0
University of Alberta, PcDBP, 20 aa Linear Peptides (PEP20205061690)	10	48	ICSSTKANNTVITNSLNYNH	12.5	0.5	0.04	12.5
University of Alberta, PcDBP, 20 aa Linear Peptides (PEP20205061690)	10	49	CSSTKANNTVITNSLNYNHA	0	0	0	0
University of Alberta, PcDBP, 20 aa Linear Peptides (PEP20205061690)	10	50	SSTKANNTVITNSLNYNHAI	4	0	0	4
University of Alberta, PcDBP, 20 aa Linear Peptides (PEP20205061690)	10	51	STKANNTVITNSLNYNHAIE	0	0	0	0
University of Alberta, PcDBP, 20 aa Linear Peptides (PEP20205061690)	10	52	TKANNTVITNSLNYNHAIES	1	1	1	0
University of Alberta, PcDBP, 20 aa Linear Peptides (PEP20205061690)	10	53	KANNTVITNSLNYNHAIESG	0	0	0	0
University of Alberta, PcDBP, 20 aa Linear Peptides (PEP20205061690)	10	54	ANNTVITNSLNYNHAIESGS	0	0	0	0
University of Alberta, PcDBP, 20 aa Linear Peptides (PEP20205061690)	10	55	NNTVITNSLNYNHAIESGSG	0	0	0	0
University of Alberta, PcDBP, 20 aa Linear Peptides (PEP20205061690)	10	56	NTVITNSLNYNHAIESGSGS	1.5	1.5	1	0
University of Alberta, PcDBP, 20 aa Linear Peptides (PEP20205061690)	10	57	TVITNSLNYNHAIESGSGSG	3	3	1	0
University of Alberta, PcDBP, 20 aa Linear Peptides (PEP20205061690)	10	58	VITNSLNYNHAIESGSGSGS	2	0	0	2
University of Alberta, PcDBP, 20 aa Linear Peptides (PEP20205061690)	10	59	ITNSLNYNHAIESGSGSGSG	3	3	1	0

## Sheet: Raw Data, 10 µg-ml
Raw Data PcDBP (PEP20205061690) - Mouse IgG1 Monoclonal Antibody 3D10, 10 µg/ml
The raw data was generated by microarray data quantification with PepSlide® Analyzer with a local microarray background. Quantification was based on 16-bit gray scale tiff files.
Spot Family	Row	Column	Peptide	Raw Mean	Background Mean	Foreground Mean	Raw Median	Background Median	Foreground Median	Av. Foreground Median	Deviation	Deviation [%]
University of Alberta, PcDBP, 20 aa Linear Peptides (PEP20205061690)	4	20	AANEGKLLLNKYDDKNNNEY	30.34	37.83	0	27	29	0	6	6	1
University of Alberta, PcDBP, 20 aa Linear Peptides (PEP20205061690)	5	20	AANEGKLLLNKYDDKNNNEY	47.95	37.83	10.12	41	29	12
University of Alberta, PcDBP, 20 aa Linear Peptides (PEP20205061690)	8	43	ACNAYETWINVNKSKWNTLL	54.52	37.83	16.68	44	29	15	14	1	0.0714286
University of Alberta, PcDBP, 20 aa Linear Peptides (PEP20205061690)	9	43	ACNAYETWINVNKSKWNTLL	48.5	37.83	10.67	42	29	13
University of Alberta, PcDBP, 20 aa Linear Peptides (PEP20205061690)	6	16	AKRDRKIWWKRHENIIWKAM	36.18	37.83	0	29	29	0	0	0	0
University of Alberta, PcDBP, 20 aa Linear Peptides (PEP20205061690)	7	16	AKRDRKIWWKRHENIIWKAM	31.72	37.83	0	27	29	0
University of Alberta, PcDBP, 20 aa Linear Peptides (PEP20205061690)	6	34	AMVLGKDFNEASNYENICTN	37.95	37.83	0.12	35	29	6	8.5	2.5	0.294118
University of Alberta, PcDBP, 20 aa Linear Peptides (PEP20205061690)	7	34	AMVLGKDFNEASNYENICTN	41.94	37.83	4.1	40	29	11
University of Alberta, PcDBP, 20 aa Linear Peptides (PEP20205061690)	4	21	ANEGKLLLNKYDDKNNNEYC	32.05	37.83	0	27	29	0	2	2	1
University of Alberta, PcDBP, 20 aa Linear Peptides (PEP20205061690)	5	21	ANEGKLLLNKYDDKNNNEYC	38.91	37.83	1.08	33	29	4
University of Alberta, PcDBP, 20 aa Linear Peptides (PEP20205061690)	4	63	ANENLLELKIQNIFGTDDNA	27.09	37.83	0	14	29	0	0	0	0
University of Alberta, PcDBP, 20 aa Linear Peptides (PEP20205061690)	5	63	ANENLLELKIQNIFGTDDNA	21.24	37.83	0	12	29	0
University of Alberta, PcDBP, 20 aa Linear Peptides (PEP20205061690)	8	66	ANFKTDYFSEETCRDKAYNS	34.17	37.83	0	21	29	0	0	0	0
University of Alberta, PcDBP, 20 aa Linear Peptides (PEP20205061690)	9	66	ANFKTDYFSEETCRDKAYNS	24.96	37.83	0	19	29	0
University of Alberta, PcDBP, 20 aa Linear Peptides (PEP20205061690)	8	16	ANKINNKCIKKSNIFTESIC	19.92	37.83	0	7	29	0	0	0	0
University of Alberta, PcDBP, 20 aa Linear Peptides (PEP20205061690)	9	16	ANKINNKCIKKSNIFTESIC	22.79	37.83	0	19	29	0
University of Alberta, PcDBP, 20 aa Linear Peptides (PEP20205061690)	10	54	ANNTVITNSLNYNHAIESGS	27.5	37.83	0	14	29	0	0	0	0
University of Alberta, PcDBP, 20 aa Linear Peptides (PEP20205061690)	11	54	ANNTVITNSLNYNHAIESGS	36.39	37.83	0	25	29	0
University of Alberta, PcDBP, 20 aa Linear Peptides (PEP20205061690)	2	44	APSRRINLCTNRLEIIPDKI	33.3	37.83	0	27	29	0	2	2	1
University of Alberta, PcDBP, 20 aa Linear Peptides (PEP20205061690)	3	44	APSRRINLCTNRLEIIPDKI	41.75	37.83	3.91	33	29	4
University of Alberta, PcDBP, 20 aa Linear Peptides (PEP20205061690)	6	67	AREWIQEFSVQYFKEANKIN	23.88	37.83	0	19	29	0	0	0	0
University of Alberta, PcDBP, 20 aa Linear Peptides (PEP20205061690)	7	67	AREWIQEFSVQYFKEANKIN	82.51	37.83	44.68	25	29	0
University of Alberta, PcDBP, 20 aa Linear Peptides (PEP20205061690)	6	44	ASNYENICTNYKLEDHHSQI	54.96	37.83	17.13	46	29	17	12	5	0.416667
University of Alberta, PcDBP, 20 aa Linear Peptides (PEP20205061690)	7	44	ASNYENICTNYKLEDHHSQI	47.09	37.83	9.26	36	29	7
University of Alberta, PcDBP, 20 aa Linear Peptides (PEP20205061690)	2	33	AWVCDEKKQNCAPSRRINLC	108.03	37.83	70.2	46	29	17	9.5	7.5	0.789474
University of Alberta, PcDBP, 20 aa Linear Peptides (PEP20205061690)	3	33	AWVCDEKKQNCAPSRRINLC	48.49	37.83	10.66	31	29	2
University of Alberta, PcDBP, 20 aa Linear Peptides (PEP20205061690)	8	46	AYETWINVNKSKWNTLLKSF	37.78	37.83	0	31	29	2	1	1	1
University of Alberta, PcDBP, 20 aa Linear Peptides (PEP20205061690)	9	46	AYETWINVNKSKWNTLLKSF	33.4	37.83	0	25	29	0
University of Alberta, PcDBP, 20 aa Linear Peptides (PEP20205061690)	10	27	AYEVNFENVINLDDDHYTGL	38.81	37.83	0.98	37	29	8	14.5	6.5	0.448276
University of Alberta, PcDBP, 20 aa Linear Peptides (PEP20205061690)	11	27	AYEVNFENVINLDDDHYTGL	184.11	37.83	146.27	50	29	21
University of Alberta, PcDBP, 20 aa Linear Peptides (PEP20205061690)	10	16	AYNSLMIEFKEAYEVNFENV	23.01	37.83	0	19	29	0	0	0	0
University of Alberta, PcDBP, 20 aa Linear Peptides (PEP20205061690)	11	16	AYNSLMIEFKEAYEVNFENV	36.39	37.83	0	26	29	0
University of Alberta, PcDBP, 20 aa Linear Peptides (PEP20205061690)	2	43	CAPSRRINLCTNRLEIIPDK	40.02	37.83	2.19	29	29	0	0	0	0
University of Alberta, PcDBP, 20 aa Linear Peptides (PEP20205061690)	3	43	CAPSRRINLCTNRLEIIPDK	35.74	37.83	0	29	29	0
University of Alberta, PcDBP, 20 aa Linear Peptides (PEP20205061690)	2	36	CDEKKQNCAPSRRINLCTNR	43.47	37.83	5.64	30	29	1	4.5	3.5	0.777778
University of Alberta, PcDBP, 20 aa Linear Peptides (PEP20205061690)	3	36	CDEKKQNCAPSRRINLCTNR	64.76	37.83	26.93	37	29	8
University of Alberta, PcDBP, 20 aa Linear Peptides (PEP20205061690)	10	47	CICSSTKANNTVITNSLNYN	28.79	37.83	0	21	29	0	0	0	0
University of Alberta, PcDBP, 20 aa Linear Peptides (PEP20205061690)	11	47	CICSSTKANNTVITNSLNYN	35.27	37.83	0	27	29	0
University of Alberta, PcDBP, 20 aa Linear Peptides (PEP20205061690)	8	23	CIKKSNIFTESICTDNNCKT	39.86	37.83	2.03	31	29	2	2	0	0
University of Alberta, PcDBP, 20 aa Linear Peptides (PEP20205061690)	9	23	CIKKSNIFTESICTDNNCKT	36.54	37.83	0	31	29	2
University of Alberta, PcDBP, 20 aa Linear Peptides (PEP20205061690)	2	23	CKQKEKTEIHAWVCDEKKQN	23.83	37.83	0	21	29	0	0	0	0
University of Alberta, PcDBP, 20 aa Linear Peptides (PEP20205061690)	3	23	CKQKEKTEIHAWVCDEKKQN	26.5	37.83	0	23	29	0
University of Alberta, PcDBP, 20 aa Linear Peptides (PEP20205061690)	8	40	CKTACNAYETWINVNKSKWN	43.12	37.83	5.28	34	29	5	4.5	0.5	0.111111
University of Alberta, PcDBP, 20 aa Linear Peptides (PEP20205061690)	9	40	CKTACNAYETWINVNKSKWN	39.2	37.83	1.37	33	29	4
University of Alberta, PcDBP, 20 aa Linear Peptides (PEP20205061690)	8	44	CNAYETWINVNKSKWNTLLK	47.74	37.83	9.9	36	29	7	8.25	1.25	0.151515
University of Alberta, PcDBP, 20 aa Linear Peptides (PEP20205061690)	9	44	CNAYETWINVNKSKWNTLLK	61.76	37.83	23.93	38.5	29	9.5
University of Alberta, PcDBP, 20 aa Linear Peptides (PEP20205061690)	4	40	CNDMVNSFGDYKNIVEGTGL	60.08	37.83	22.24	46	29	17	10.5	6.5	0.619048
University of Alberta, PcDBP, 20 aa Linear Peptides (PEP20205061690)	5	40	CNDMVNSFGDYKNIVEGTGL	42.38	37.83	4.54	33	29	4
University of Alberta, PcDBP, 20 aa Linear Peptides (PEP20205061690)	10	12	CRDKAYNSLMIEFKEAYEVN	31.89	37.83	0	23	29	0	0	0	0
University of Alberta, PcDBP, 20 aa Linear Peptides (PEP20205061690)	11	12	CRDKAYNSLMIEFKEAYEVN	26.15	37.83	0	23	29	0
University of Alberta, PcDBP, 20 aa Linear Peptides (PEP20205061690)	10	49	CSSTKANNTVITNSLNYNHA	36.54	37.83	0	27	29	0	0	0	0
University of Alberta, PcDBP, 20 aa Linear Peptides (PEP20205061690)	11	49	CSSTKANNTVITNSLNYNHA	38.01	37.83	0.17	21	29	0
University of Alberta, PcDBP, 20 aa Linear Peptides (PEP20205061690)	8	35	CTDNNCKTACNAYETWINVN	42.37	37.83	4.54	29	29	0	0	0	0
University of Alberta, PcDBP, 20 aa Linear Peptides (PEP20205061690)	9	35	CTDNNCKTACNAYETWINVN	36.46	37.83	0	29	29	0
University of Alberta, PcDBP, 20 aa Linear Peptides (PEP20205061690)	2	52	CTNRLEIIPDKIEIKDNEMK	26.78	37.83	0	19	29	0	0.5	0.5	1
University of Alberta, PcDBP, 20 aa Linear Peptides (PEP20205061690)	3	52	CTNRLEIIPDKIEIKDNEMK	37.49	37.83	0	30	29	1
University of Alberta, PcDBP, 20 aa Linear Peptides (PEP20205061690)	6	51	CTNYKLEDHHSQIERWAREW	83.98	37.83	46.15	43	29	14	13.5	0.5	0.037037
University of Alberta, PcDBP, 20 aa Linear Peptides (PEP20205061690)	7	51	CTNYKLEDHHSQIERWAREW	45.18	37.83	7.34	42	29	13
University of Alberta, PcDBP, 20 aa Linear Peptides (PEP20205061690)	4	19	DAANEGKLLLNKYDDKNNNE	23.4	37.83	0	16	29	0	0	0	0
University of Alberta, PcDBP, 20 aa Linear Peptides (PEP20205061690)	5	19	DAANEGKLLLNKYDDKNNNE	26.29	37.83	0	21	29	0
University of Alberta, PcDBP, 20 aa Linear Peptides (PEP20205061690)	10	39	DDDHYTGLCICSSTKANNTV	28.04	37.83	0	23	29	0	3	3	1
University of Alberta, PcDBP, 20 aa Linear Peptides (PEP20205061690)	11	39	DDDHYTGLCICSSTKANNTV	37.42	37.83	0	35	29	6
University of Alberta, PcDBP, 20 aa Linear Peptides (PEP20205061690)	10	40	DDHYTGLCICSSTKANNTVI	33.58	37.83	0	21	29	0	1	1	1
University of Alberta, PcDBP, 20 aa Linear Peptides (PEP20205061690)	11	40	DDHYTGLCICSSTKANNTVI	38.82	37.83	0.98	31	29	2
University of Alberta, PcDBP, 20 aa Linear Peptides (PEP20205061690)	4	32	DDKNNNEYCNDMVNSFGDYK	39.2	37.83	1.37	30	29	1	5.25	4.25	0.809524
University of Alberta, PcDBP, 20 aa Linear Peptides (PEP20205061690)	5	32	DDKNNNEYCNDMVNSFGDYK	39.92	37.83	2.08	38.5	29	9.5
University of Alberta, PcDBP, 20 aa Linear Peptides (PEP20205061690)	6	13	DDNAKRDRKIWWKRHENIIW	37.09	37.83	0	26	29	0	0	0	0
University of Alberta, PcDBP, 20 aa Linear Peptides (PEP20205061690)	7	13	DDNAKRDRKIWWKRHENIIW	28.89	37.83	0	25	29	0
University of Alberta, PcDBP, 20 aa Linear Peptides (PEP20205061690)	2	37	DEKKQNCAPSRRINLCTNRL	60.11	37.83	22.28	37	29	8	7	1	0.142857
University of Alberta, PcDBP, 20 aa Linear Peptides (PEP20205061690)	3	37	DEKKQNCAPSRRINLCTNRL	76.02	37.83	38.18	35	29	6
University of Alberta, PcDBP, 20 aa Linear Peptides (PEP20205061690)	6	40	DFNEASNYENICTNYKLEDH	42.16	37.83	4.33	31	29	2	2	0	0
University of Alberta, PcDBP, 20 aa Linear Peptides (PEP20205061690)	7	40	DFNEASNYENICTNYKLEDH	40.44	37.83	2.6	31	29	2
University of Alberta, PcDBP, 20 aa Linear Peptides (PEP20205061690)	6	58	DHHSQIERWAREWIQEFSVQ	40.72	37.83	2.89	21	29	0	0	0	0
University of Alberta, PcDBP, 20 aa Linear Peptides (PEP20205061690)	7	58	DHHSQIERWAREWIQEFSVQ	29.97	37.83	0	25	29	0
University of Alberta, PcDBP, 20 aa Linear Peptides (PEP20205061690)	10	41	DHYTGLCICSSTKANNTVIT	32.57	37.83	0	25	29	0	1	1	1
University of Alberta, PcDBP, 20 aa Linear Peptides (PEP20205061690)	11	41	DHYTGLCICSSTKANNTVIT	39.12	37.83	1.28	31	29	2
University of Alberta, PcDBP, 20 aa Linear Peptides (PEP20205061690)	10	14	DKAYNSLMIEFKEAYEVNFE	24.24	37.83	0	19	29	0	0	0	0
University of Alberta, PcDBP, 20 aa Linear Peptides (PEP20205061690)	11	14	DKAYNSLMIEFKEAYEVNFE	32.11	37.83	0	19	29	0
University of Alberta, PcDBP, 20 aa Linear Peptides (PEP20205061690)	2	61	DKIEIKDNEMKELLMDYFKK	28.34	37.83	0	24	29	0	0	0	0
University of Alberta, PcDBP, 20 aa Linear Peptides (PEP20205061690)	3	61	DKIEIKDNEMKELLMDYFKK	28.09	37.83	0	20	29	0
University of Alberta, PcDBP, 20 aa Linear Peptides (PEP20205061690)	4	33	DKNNNEYCNDMVNSFGDYKN	37.96	37.83	0.13	35	29	6	3	3	1
University of Alberta, PcDBP, 20 aa Linear Peptides (PEP20205061690)	5	33	DKNNNEYCNDMVNSFGDYKN	31.09	37.83	0	29	29	0
University of Alberta, PcDBP, 20 aa Linear Peptides (PEP20205061690)	2	16	DKYQINECKQKEKTEIHAWV	31.96	37.83	0	28	29	0	0	0	0
University of Alberta, PcDBP, 20 aa Linear Peptides (PEP20205061690)	3	16	DKYQINECKQKEKTEIHAWV	26.37	37.83	0	19	29	0
University of Alberta, PcDBP, 20 aa Linear Peptides (PEP20205061690)	4	42	DMVNSFGDYKNIVEGTGLKN	41.83	37.83	4	33	29	4	5	1	0.2
University of Alberta, PcDBP, 20 aa Linear Peptides (PEP20205061690)	5	42	DMVNSFGDYKNIVEGTGLKN	38.59	37.83	0.76	35	29	6
University of Alberta, PcDBP, 20 aa Linear Peptides (PEP20205061690)	6	14	DNAKRDRKIWWKRHENIIWK	28.44	37.83	0	21	29	0	0	0	0
University of Alberta, PcDBP, 20 aa Linear Peptides (PEP20205061690)	7	14	DNAKRDRKIWWKRHENIIWK	30.62	37.83	0	27	29	0
University of Alberta, PcDBP, 20 aa Linear Peptides (PEP20205061690)	2	67	DNEMKELLMDYFKKFIYEDA	34.45	37.83	0	26	29	0	0	0	0
University of Alberta, PcDBP, 20 aa Linear Peptides (PEP20205061690)	3	67	DNEMKELLMDYFKKFIYEDA	39.33	37.83	1.5	27	29	0
University of Alberta, PcDBP, 20 aa Linear Peptides (PEP20205061690)	8	37	DNNCKTACNAYETWINVNKS	37.56	37.83	0	30	29	1	2.5	1.5	0.6
University of Alberta, PcDBP, 20 aa Linear Peptides (PEP20205061690)	9	37	DNNCKTACNAYETWINVNKS	41.52	37.83	3.69	33	29	4
University of Alberta, PcDBP, 20 aa Linear Peptides (PEP20205061690)	6	19	DRKIWWKRHENIIWKAMVLG	33.82	37.83	0	33	29	4	2	2	1
University of Alberta, PcDBP, 20 aa Linear Peptides (PEP20205061690)	7	19	DRKIWWKRHENIIWKAMVLG	29.58	37.83	0	25	29	0
University of Alberta, PcDBP, 20 aa Linear Peptides (PEP20205061690)	4	10	DYFKKFIYEDAANEGKLLLN	24.78	37.83	0	21	29	0	0	0	0
University of Alberta, PcDBP, 20 aa Linear Peptides (PEP20205061690)	5	10	DYFKKFIYEDAANEGKLLLN	20.07	37.83	0	11	29	0
University of Alberta, PcDBP, 20 aa Linear Peptides (PEP20205061690)	10	5	DYFSEETCRDKAYNSLMIEF	29.24	37.83	0	23	29	0	1	1	1
University of Alberta, PcDBP, 20 aa Linear Peptides (PEP20205061690)	11	5	DYFSEETCRDKAYNSLMIEF	39.58	37.83	1.74	31	29	2
University of Alberta, PcDBP, 20 aa Linear Peptides (PEP20205061690)	4	49	DYKNIVEGTGLKNVANENLL	31.3	37.83	0	25	29	0	5.5	5.5	1
University of Alberta, PcDBP, 20 aa Linear Peptides (PEP20205061690)	5	49	DYKNIVEGTGLKNVANENLL	48.22	37.83	10.39	40	29	11
University of Alberta, PcDBP, 20 aa Linear Peptides (PEP20205061690)	8	15	EANKINNKCIKKSNIFTESI	22.87	37.83	0	9	29	0	0	0	0
University of Alberta, PcDBP, 20 aa Linear Peptides (PEP20205061690)	9	15	EANKINNKCIKKSNIFTESI	39.47	37.83	1.64	17.5	29	0
University of Alberta, PcDBP, 20 aa Linear Peptides (PEP20205061690)	6	43	EASNYENICTNYKLEDHHSQ	64.72	37.83	26.89	52	29	23	16.25	6.75	0.415385
University of Alberta, PcDBP, 20 aa Linear Peptides (PEP20205061690)	7	43	EASNYENICTNYKLEDHHSQ	46.64	37.83	8.8	38.5	29	9.5
University of Alberta, PcDBP, 20 aa Linear Peptides (PEP20205061690)	10	26	EAYEVNFENVINLDDDHYTG	43.9	37.83	6.07	37	29	8	4	4	1
University of Alberta, PcDBP, 20 aa Linear Peptides (PEP20205061690)	11	26	EAYEVNFENVINLDDDHYTG	37.69	37.83	0	29	29	0
University of Alberta, PcDBP, 20 aa Linear Peptides (PEP20205061690)	2	22	ECKQKEKTEIHAWVCDEKKQ	22.66	37.83	0	20	29	0	0	0	0
University of Alberta, PcDBP, 20 aa Linear Peptides (PEP20205061690)	3	22	ECKQKEKTEIHAWVCDEKKQ	25.38	37.83	0	16	29	0
University of Alberta, PcDBP, 20 aa Linear Peptides (PEP20205061690)	4	18	EDAANEGKLLLNKYDDKNNN	26.98	37.83	0	21	29	0	0	0	0
University of Alberta, PcDBP, 20 aa Linear Peptides (PEP20205061690)	5	18	EDAANEGKLLLNKYDDKNNN	33.21	37.83	0	27	29	0
University of Alberta, PcDBP, 20 aa Linear Peptides (PEP20205061690)	6	57	EDHHSQIERWAREWIQEFSV	31.54	37.83	0	27	29	0	0	0	0
University of Alberta, PcDBP, 20 aa Linear Peptides (PEP20205061690)	7	57	EDHHSQIERWAREWIQEFSV	46.88	37.83	9.05	27	29	0
University of Alberta, PcDBP, 20 aa Linear Peptides (PEP20205061690)	10	9	EETCRDKAYNSLMIEFKEAY	26.06	37.83	0	25	29	0	0	0	0
University of Alberta, PcDBP, 20 aa Linear Peptides (PEP20205061690)	11	9	EETCRDKAYNSLMIEFKEAY	27.42	37.83	0	21	29	0
University of Alberta, PcDBP, 20 aa Linear Peptides (PEP20205061690)	10	23	EFKEAYEVNFENVINLDDDH	29.36	37.83	0	22	29	0	0	0	0
University of Alberta, PcDBP, 20 aa Linear Peptides (PEP20205061690)	11	23	EFKEAYEVNFENVINLDDDH	26.65	37.83	0	19	29	0
University of Alberta, PcDBP, 20 aa Linear Peptides (PEP20205061690)	8	7	EFSVQYFKEANKINNKCIKK	116.64	37.83	78.8	75	29	46	89.75	43.75	0.487465
University of Alberta, PcDBP, 20 aa Linear Peptides (PEP20205061690)	9	7	EFSVQYFKEANKINNKCIKK	258.5	37.83	220.67	162.5	29	133.5
University of Alberta, PcDBP, 20 aa Linear Peptides (PEP20205061690)	4	23	EGKLLLNKYDDKNNNEYCND	27.39	37.83	0	23	29	0	0	0	0
University of Alberta, PcDBP, 20 aa Linear Peptides (PEP20205061690)	5	23	EGKLLLNKYDDKNNNEYCND	28.82	37.83	0	20	29	0
University of Alberta, PcDBP, 20 aa Linear Peptides (PEP20205061690)	4	55	EGTGLKNVANENLLELKIQN	28.81	37.83	0	24	29	0	0	0	0
University of Alberta, PcDBP, 20 aa Linear Peptides (PEP20205061690)	5	55	EGTGLKNVANENLLELKIQN	42.04	37.83	4.2	27	29	0
University of Alberta, PcDBP, 20 aa Linear Peptides (PEP20205061690)	2	30	EIHAWVCDEKKQNCAPSRRI	35.56	37.83	0	33	29	4	2	2	1
University of Alberta, PcDBP, 20 aa Linear Peptides (PEP20205061690)	3	30	EIHAWVCDEKKQNCAPSRRI	35.77	37.83	0	29	29	0
University of Alberta, PcDBP, 20 aa Linear Peptides (PEP20205061690)	2	57	EIIPDKIEIKDNEMKELLMD	23.26	37.83	0	15	29	0	0	0	0
University of Alberta, PcDBP, 20 aa Linear Peptides (PEP20205061690)	3	57	EIIPDKIEIKDNEMKELLMD	27.29	37.83	0	21	29	0
University of Alberta, PcDBP, 20 aa Linear Peptides (PEP20205061690)	2	64	EIKDNEMKELLMDYFKKFIY	24.35	37.83	0	16	29	0	0	0	0
University of Alberta, PcDBP, 20 aa Linear Peptides (PEP20205061690)	3	64	EIKDNEMKELLMDYFKKFIY	28.26	37.83	0	22	29	0
University of Alberta, PcDBP, 20 aa Linear Peptides (PEP20205061690)	2	38	EKKQNCAPSRRINLCTNRLE	36.7	37.83	0	33	29	4	4	0	0
University of Alberta, PcDBP, 20 aa Linear Peptides (PEP20205061690)	3	38	EKKQNCAPSRRINLCTNRLE	43.88	37.83	6.05	33	29	4
University of Alberta, PcDBP, 20 aa Linear Peptides (PEP20205061690)	2	27	EKTEIHAWVCDEKKQNCAPS	28.59	37.83	0	21	29	0	3	3	1
University of Alberta, PcDBP, 20 aa Linear Peptides (PEP20205061690)	3	27	EKTEIHAWVCDEKKQNCAPS	37.35	37.83	0	35	29	6
University of Alberta, PcDBP, 20 aa Linear Peptides (PEP20205061690)	6	3	ELKIQNIFGTDDNAKRDRKI	504.75	37.83	466.92	460	29	431	379.5	51.5	0.135705
University of Alberta, PcDBP, 20 aa Linear Peptides (PEP20205061690)	7	3	ELKIQNIFGTDDNAKRDRKI	398.74	37.83	360.91	357	29	328
University of Alberta, PcDBP, 20 aa Linear Peptides (PEP20205061690)	4	6	ELLMDYFKKFIYEDAANEGK	17.67	37.83	0	10	29	0	0	0	0
University of Alberta, PcDBP, 20 aa Linear Peptides (PEP20205061690)	5	6	ELLMDYFKKFIYEDAANEGK	29.85	37.83	0	23	29	0
University of Alberta, PcDBP, 20 aa Linear Peptides (PEP20205061690)	4	3	EMKELLMDYFKKFIYEDAAN	35.72	37.83	0	32	29	3	3	0	0
University of Alberta, PcDBP, 20 aa Linear Peptides (PEP20205061690)	5	3	EMKELLMDYFKKFIYEDAAN	36.57	37.83	0	32	29	3
University of Alberta, PcDBP, 20 aa Linear Peptides (PEP20205061690)	6	48	ENICTNYKLEDHHSQIERWA	35.75	37.83	0	33	29	4	8.5	4.5	0.529412
University of Alberta, PcDBP, 20 aa Linear Peptides (PEP20205061690)	7	48	ENICTNYKLEDHHSQIERWA	46.49	37.83	8.66	42	29	13
University of Alberta, PcDBP, 20 aa Linear Peptides (PEP20205061690)	6	28	ENIIWKAMVLGKDFNEASNY	25.05	37.83	0	16	29	0	1	1	1
University of Alberta, PcDBP, 20 aa Linear Peptides (PEP20205061690)	7	28	ENIIWKAMVLGKDFNEASNY	31.48	37.83	0	31	29	2
University of Alberta, PcDBP, 20 aa Linear Peptides (PEP20205061690)	4	65	ENLLELKIQNIFGTDDNAKR	39.73	37.83	1.9	21	29	0	0	0	0
University of Alberta, PcDBP, 20 aa Linear Peptides (PEP20205061690)	5	65	ENLLELKIQNIFGTDDNAKR	35.06	37.83	0	17.5	29	0
University of Alberta, PcDBP, 20 aa Linear Peptides (PEP20205061690)	10	33	ENVINLDDDHYTGLCICSST	41.14	37.83	3.3	34	29	5	3	2	0.666667
University of Alberta, PcDBP, 20 aa Linear Peptides (PEP20205061690)	11	33	ENVINLDDDHYTGLCICSST	37.53	37.83	0	30	29	1
University of Alberta, PcDBP, 20 aa Linear Peptides (PEP20205061690)	6	64	ERWAREWIQEFSVQYFKEAN	40.66	37.83	2.83	27	29	0	0	0	0
University of Alberta, PcDBP, 20 aa Linear Peptides (PEP20205061690)	7	64	ERWAREWIQEFSVQYFKEAN	32.74	37.83	0	25	29	0
University of Alberta, PcDBP, 20 aa Linear Peptides (PEP20205061690)	8	32	ESICTDNNCKTACNAYETWI	38.99	37.83	1.16	37	29	8	7	1	0.142857
University of Alberta, PcDBP, 20 aa Linear Peptides (PEP20205061690)	9	32	ESICTDNNCKTACNAYETWI	38.16	37.83	0.33	35	29	6
University of Alberta, PcDBP, 20 aa Linear Peptides (PEP20205061690)	10	10	ETCRDKAYNSLMIEFKEAYE	20.42	37.83	0	8	29	0	0	0	0
University of Alberta, PcDBP, 20 aa Linear Peptides (PEP20205061690)	11	10	ETCRDKAYNSLMIEFKEAYE	33.84	37.83	0	28	29	0
University of Alberta, PcDBP, 20 aa Linear Peptides (PEP20205061690)	8	48	ETWINVNKSKWNTLLKSFAN	54.34	37.83	16.51	28	29	0	2	2	1
University of Alberta, PcDBP, 20 aa Linear Peptides (PEP20205061690)	9	48	ETWINVNKSKWNTLLKSFAN	45.75	37.83	7.92	33	29	4
University of Alberta, PcDBP, 20 aa Linear Peptides (PEP20205061690)	10	29	EVNFENVINLDDDHYTGLCI	30.48	37.83	0	23	29	0	0	0	0
University of Alberta, PcDBP, 20 aa Linear Peptides (PEP20205061690)	11	29	EVNFENVINLDDDHYTGLCI	29.81	37.83	0	25	29	0
University of Alberta, PcDBP, 20 aa Linear Peptides (PEP20205061690)	8	3	EWIQEFSVQYFKEANKINNK	33.88	37.83	0	27	29	0	7.5	7.5	1
University of Alberta, PcDBP, 20 aa Linear Peptides (PEP20205061690)	9	3	EWIQEFSVQYFKEANKINNK	48.61	37.83	10.78	44	29	15
University of Alberta, PcDBP, 20 aa Linear Peptides (PEP20205061690)	4	38	EYCNDMVNSFGDYKNIVEGT	38.56	37.83	0.73	29	29	0	0	0	0
University of Alberta, PcDBP, 20 aa Linear Peptides (PEP20205061690)	5	38	EYCNDMVNSFGDYKNIVEGT	28.37	37.83	0	25	29	0
University of Alberta, PcDBP, 20 aa Linear Peptides (PEP20205061690)	2	13	EYFDKYQINECKQKEKTEIH	23.03	37.83	0	10	29	0	0	0	0
University of Alberta, PcDBP, 20 aa Linear Peptides (PEP20205061690)	3	13	EYFDKYQINECKQKEKTEIH	25.78	37.83	0	16	29	0
University of Alberta, PcDBP, 20 aa Linear Peptides (PEP20205061690)	8	65	FANFKTDYFSEETCRDKAYN	36.76	37.83	0	19	29	0	0	0	0
University of Alberta, PcDBP, 20 aa Linear Peptides (PEP20205061690)	9	65	FANFKTDYFSEETCRDKAYN	28.71	37.83	0	24	29	0
University of Alberta, PcDBP, 20 aa Linear Peptides (PEP20205061690)	2	15	FDKYQINECKQKEKTEIHAW	30.72	37.83	0	25	29	0	0	0	0
University of Alberta, PcDBP, 20 aa Linear Peptides (PEP20205061690)	3	15	FDKYQINECKQKEKTEIHAW	30.99	37.83	0	27	29	0
University of Alberta, PcDBP, 20 aa Linear Peptides (PEP20205061690)	10	32	FENVINLDDDHYTGLCICSS	29.85	37.83	0	22	29	0	0	0	0
University of Alberta, PcDBP, 20 aa Linear Peptides (PEP20205061690)	11	32	FENVINLDDDHYTGLCICSS	29.5	37.83	0	21	29	0
University of Alberta, PcDBP, 20 aa Linear Peptides (PEP20205061690)	4	47	FGDYKNIVEGTGLKNVANEN	25.27	37.83	0	19	29	0	0	0	0
University of Alberta, PcDBP, 20 aa Linear Peptides (PEP20205061690)	5	47	FGDYKNIVEGTGLKNVANEN	43.03	37.83	5.2	29	29	0
University of Alberta, PcDBP, 20 aa Linear Peptides (PEP20205061690)	6	10	FGTDDNAKRDRKIWWKRHEN	31.1	37.83	0	29	29	0	0	0	0
University of Alberta, PcDBP, 20 aa Linear Peptides (PEP20205061690)	7	10	FGTDDNAKRDRKIWWKRHEN	28.09	37.83	0	26	29	0
University of Alberta, PcDBP, 20 aa Linear Peptides (PEP20205061690)	4	15	FIYEDAANEGKLLLNKYDDK	51.47	37.83	13.64	48	29	19	20	1	0.05
University of Alberta, PcDBP, 20 aa Linear Peptides (PEP20205061690)	5	15	FIYEDAANEGKLLLNKYDDK	57.26	37.83	19.43	50	29	21
University of Alberta, PcDBP, 20 aa Linear Peptides (PEP20205061690)	8	13	FKEANKINNKCIKKSNIFTE	18.68	37.83	0	4	29	0	5.5	5.5	1
University of Alberta, PcDBP, 20 aa Linear Peptides (PEP20205061690)	9	13	FKEANKINNKCIKKSNIFTE	110.36	37.83	72.53	40	29	11
University of Alberta, PcDBP, 20 aa Linear Peptides (PEP20205061690)	10	24	FKEAYEVNFENVINLDDDHY	35.72	37.83	0	31	29	2	5.75	3.75	0.652174
University of Alberta, PcDBP, 20 aa Linear Peptides (PEP20205061690)	11	24	FKEAYEVNFENVINLDDDHY	45.38	37.83	7.54	38.5	29	9.5
University of Alberta, PcDBP, 20 aa Linear Peptides (PEP20205061690)	4	12	FKKFIYEDAANEGKLLLNKY	26.55	37.83	0	23	29	0	0	0	0
University of Alberta, PcDBP, 20 aa Linear Peptides (PEP20205061690)	5	12	FKKFIYEDAANEGKLLLNKY	29.81	37.83	0	23	29	0
University of Alberta, PcDBP, 20 aa Linear Peptides (PEP20205061690)	10	2	FKTDYFSEETCRDKAYNSLM	31.42	37.83	0	26	29	0	0	0	0
University of Alberta, PcDBP, 20 aa Linear Peptides (PEP20205061690)	11	2	FKTDYFSEETCRDKAYNSLM	31.94	37.83	0	26	29	0
University of Alberta, PcDBP, 20 aa Linear Peptides (PEP20205061690)	6	41	FNEASNYENICTNYKLEDHH	43.32	37.83	5.48	35	29	6	4	2	0.5
University of Alberta, PcDBP, 20 aa Linear Peptides (PEP20205061690)	7	41	FNEASNYENICTNYKLEDHH	33.61	37.83	0	31	29	2
University of Alberta, PcDBP, 20 aa Linear Peptides (PEP20205061690)	10	7	FSEETCRDKAYNSLMIEFKE	21.49	37.83	0	14	29	0	0	0	0
University of Alberta, PcDBP, 20 aa Linear Peptides (PEP20205061690)	11	7	FSEETCRDKAYNSLMIEFKE	28.81	37.83	0	23	29	0
University of Alberta, PcDBP, 20 aa Linear Peptides (PEP20205061690)	8	8	FSVQYFKEANKINNKCIKKS	243.88	37.83	206.05	231	29	202	204.5	2.5	0.0122249
University of Alberta, PcDBP, 20 aa Linear Peptides (PEP20205061690)	9	8	FSVQYFKEANKINNKCIKKS	380.18	37.83	342.35	236	29	207
University of Alberta, PcDBP, 20 aa Linear Peptides (PEP20205061690)	8	30	FTESICTDNNCKTACNAYET	26.95	37.83	0	19	29	0	0	0	0
University of Alberta, PcDBP, 20 aa Linear Peptides (PEP20205061690)	9	30	FTESICTDNNCKTACNAYET	24.68	37.83	0	21	29	0
University of Alberta, PcDBP, 20 aa Linear Peptides (PEP20205061690)	4	48	GDYKNIVEGTGLKNVANENL	66.86	37.83	29.03	38.5	29	9.5	4.75	4.75	1
University of Alberta, PcDBP, 20 aa Linear Peptides (PEP20205061690)	5	48	GDYKNIVEGTGLKNVANENL	40.88	37.83	3.05	22	29	0
University of Alberta, PcDBP, 20 aa Linear Peptides (PEP20205061690)	6	38	GKDFNEASNYENICTNYKLE	36.52	37.83	0	26	29	0	2	2	1
University of Alberta, PcDBP, 20 aa Linear Peptides (PEP20205061690)	7	38	GKDFNEASNYENICTNYKLE	42.54	37.83	4.7	33	29	4
University of Alberta, PcDBP, 20 aa Linear Peptides (PEP20205061690)	4	24	GKLLLNKYDDKNNNEYCNDM	33.56	37.83	0	28	29	0	0	0	0
University of Alberta, PcDBP, 20 aa Linear Peptides (PEP20205061690)	5	24	GKLLLNKYDDKNNNEYCNDM	32.02	37.83	0	25	29	0
University of Alberta, PcDBP, 20 aa Linear Peptides (PEP20205061690)	10	45	GLCICSSTKANNTVITNSLN	42.68	37.83	4.84	25	29	0	0	0	0
University of Alberta, PcDBP, 20 aa Linear Peptides (PEP20205061690)	11	45	GLCICSSTKANNTVITNSLN	38.05	37.83	0.22	21	29	0
University of Alberta, PcDBP, 20 aa Linear Peptides (PEP20205061690)	4	58	GLKNVANENLLELKIQNIFG	42.76	37.83	4.93	25	29	0	3	3	1
University of Alberta, PcDBP, 20 aa Linear Peptides (PEP20205061690)	5	58	GLKNVANENLLELKIQNIFG	47.21	37.83	9.37	35	29	6
University of Alberta, PcDBP, 20 aa Linear Peptides (PEP20205061690)	2	2	GSGSGSGVNYKEYFDKYQIN	65.34	37.83	27.51	58	29	29	25	4	0.16
University of Alberta, PcDBP, 20 aa Linear Peptides (PEP20205061690)	3	2	GSGSGSGVNYKEYFDKYQIN	62.34	37.83	24.5	50	29	21
University of Alberta, PcDBP, 20 aa Linear Peptides (PEP20205061690)	2	4	GSGSGVNYKEYFDKYQINEC	36.58	37.83	0	35	29	6	5	1	0.2
University of Alberta, PcDBP, 20 aa Linear Peptides (PEP20205061690)	3	4	GSGSGVNYKEYFDKYQINEC	36.4	37.83	0	33	29	4
University of Alberta, PcDBP, 20 aa Linear Peptides (PEP20205061690)	2	6	GSGVNYKEYFDKYQINECKQ	43	37.83	5.17	35	29	6	3	3	1
University of Alberta, PcDBP, 20 aa Linear Peptides (PEP20205061690)	3	6	GSGVNYKEYFDKYQINECKQ	37.71	37.83	0	27	29	0
University of Alberta, PcDBP, 20 aa Linear Peptides (PEP20205061690)	6	11	GTDDNAKRDRKIWWKRHENI	36.35	37.83	0	33	29	4	2	2	1
University of Alberta, PcDBP, 20 aa Linear Peptides (PEP20205061690)	7	11	GTDDNAKRDRKIWWKRHENI	34.48	37.83	0	29	29	0
University of Alberta, PcDBP, 20 aa Linear Peptides (PEP20205061690)	4	56	GTGLKNVANENLLELKIQNI	47.51	37.83	9.67	25	29	0	2	2	1
University of Alberta, PcDBP, 20 aa Linear Peptides (PEP20205061690)	5	56	GTGLKNVANENLLELKIQNI	35.42	37.83	0	33	29	4
University of Alberta, PcDBP, 20 aa Linear Peptides (PEP20205061690)	2	8	GVNYKEYFDKYQINECKQKE	43.29	37.83	5.46	38.5	29	9.5	7.75	1.75	0.225806
University of Alberta, PcDBP, 20 aa Linear Peptides (PEP20205061690)	3	8	GVNYKEYFDKYQINECKQKE	38.39	37.83	0.56	35	29	6
University of Alberta, PcDBP, 20 aa Linear Peptides (PEP20205061690)	2	32	HAWVCDEKKQNCAPSRRINL	27.05	37.83	0	19	29	0	0.5	0.5	1
University of Alberta, PcDBP, 20 aa Linear Peptides (PEP20205061690)	3	32	HAWVCDEKKQNCAPSRRINL	35.95	37.83	0	30	29	1
University of Alberta, PcDBP, 20 aa Linear Peptides (PEP20205061690)	6	27	HENIIWKAMVLGKDFNEASN	29.36	37.83	0	23	29	0	0	0	0
University of Alberta, PcDBP, 20 aa Linear Peptides (PEP20205061690)	7	27	HENIIWKAMVLGKDFNEASN	34.91	37.83	0	25	29	0
University of Alberta, PcDBP, 20 aa Linear Peptides (PEP20205061690)	6	59	HHSQIERWAREWIQEFSVQY	29.01	37.83	0	22	29	0	2	2	1
University of Alberta, PcDBP, 20 aa Linear Peptides (PEP20205061690)	7	59	HHSQIERWAREWIQEFSVQY	35.53	37.83	0	33	29	4
University of Alberta, PcDBP, 20 aa Linear Peptides (PEP20205061690)	6	60	HSQIERWAREWIQEFSVQYF	38.61	37.83	0.78	35	29	6	3	3	1
University of Alberta, PcDBP, 20 aa Linear Peptides (PEP20205061690)	7	60	HSQIERWAREWIQEFSVQYF	36.59	37.83	0	29	29	0
University of Alberta, PcDBP, 20 aa Linear Peptides (PEP20205061690)	10	42	HYTGLCICSSTKANNTVITN	44.09	37.83	6.26	33	29	4	3	1	0.333333
University of Alberta, PcDBP, 20 aa Linear Peptides (PEP20205061690)	11	42	HYTGLCICSSTKANNTVITN	35.97	37.83	0	31	29	2
University of Alberta, PcDBP, 20 aa Linear Peptides (PEP20205061690)	10	48	ICSSTKANNTVITNSLNYNH	49.58	37.83	11.75	42	29	13	12.5	0.5	0.04
University of Alberta, PcDBP, 20 aa Linear Peptides (PEP20205061690)	11	48	ICSSTKANNTVITNSLNYNH	100.73	37.83	62.9	41	29	12
University of Alberta, PcDBP, 20 aa Linear Peptides (PEP20205061690)	8	34	ICTDNNCKTACNAYETWINV	46.19	37.83	8.36	38.5	29	9.5	4.75	4.75	1
University of Alberta, PcDBP, 20 aa Linear Peptides (PEP20205061690)	9	34	ICTDNNCKTACNAYETWINV	33.36	37.83	0	26	29	0
University of Alberta, PcDBP, 20 aa Linear Peptides (PEP20205061690)	6	50	ICTNYKLEDHHSQIERWARE	49.68	37.83	11.84	44	29	15	11.5	3.5	0.304348
University of Alberta, PcDBP, 20 aa Linear Peptides (PEP20205061690)	7	50	ICTNYKLEDHHSQIERWARE	43.18	37.83	5.35	37	29	8
University of Alberta, PcDBP, 20 aa Linear Peptides (PEP20205061690)	10	22	IEFKEAYEVNFENVINLDDD	31.14	37.83	0	27	29	0	0	0	0
University of Alberta, PcDBP, 20 aa Linear Peptides (PEP20205061690)	11	22	IEFKEAYEVNFENVINLDDD	34.26	37.83	0	29	29	0
University of Alberta, PcDBP, 20 aa Linear Peptides (PEP20205061690)	2	63	IEIKDNEMKELLMDYFKKFI	26.89	37.83	0	21	29	0	0	0	0
University of Alberta, PcDBP, 20 aa Linear Peptides (PEP20205061690)	3	63	IEIKDNEMKELLMDYFKKFI	28.44	37.83	0	21	29	0
University of Alberta, PcDBP, 20 aa Linear Peptides (PEP20205061690)	6	63	IERWAREWIQEFSVQYFKEA	25.98	37.83	0	15	29	0	0	0	0
University of Alberta, PcDBP, 20 aa Linear Peptides (PEP20205061690)	7	63	IERWAREWIQEFSVQYFKEA	29.92	37.83	0	25	29	0
University of Alberta, PcDBP, 20 aa Linear Peptides (PEP20205061690)	6	9	IFGTDDNAKRDRKIWWKRHE	34.63	37.83	0	30	29	1	0.5	0.5	1
University of Alberta, PcDBP, 20 aa Linear Peptides (PEP20205061690)	7	9	IFGTDDNAKRDRKIWWKRHE	26.71	37.83	0	21	29	0
University of Alberta, PcDBP, 20 aa Linear Peptides (PEP20205061690)	8	29	IFTESICTDNNCKTACNAYE	32.76	37.83	0	23	29	0	0	0	0
University of Alberta, PcDBP, 20 aa Linear Peptides (PEP20205061690)	9	29	IFTESICTDNNCKTACNAYE	30.04	37.83	0	21	29	0
University of Alberta, PcDBP, 20 aa Linear Peptides (PEP20205061690)	2	31	IHAWVCDEKKQNCAPSRRIN	33.63	37.83	0	29	29	0	0	0	0
University of Alberta, PcDBP, 20 aa Linear Peptides (PEP20205061690)	3	31	IHAWVCDEKKQNCAPSRRIN	31.31	37.83	0	25	29	0
University of Alberta, PcDBP, 20 aa Linear Peptides (PEP20205061690)	2	58	IIPDKIEIKDNEMKELLMDY	21.01	37.83	0	10	29	0	1	1	1
University of Alberta, PcDBP, 20 aa Linear Peptides (PEP20205061690)	3	58	IIPDKIEIKDNEMKELLMDY	38.14	37.83	0.3	31	29	2
University of Alberta, PcDBP, 20 aa Linear Peptides (PEP20205061690)	6	30	IIWKAMVLGKDFNEASNYEN	29.18	37.83	0	22	29	0	0	0	0
University of Alberta, PcDBP, 20 aa Linear Peptides (PEP20205061690)	7	30	IIWKAMVLGKDFNEASNYEN	29.41	37.83	0	25	29	0
University of Alberta, PcDBP, 20 aa Linear Peptides (PEP20205061690)	2	65	IKDNEMKELLMDYFKKFIYE	41.74	37.83	3.9	31	29	2	1	1	1
University of Alberta, PcDBP, 20 aa Linear Peptides (PEP20205061690)	3	65	IKDNEMKELLMDYFKKFIYE	35.3	37.83	0	27	29	0
University of Alberta, PcDBP, 20 aa Linear Peptides (PEP20205061690)	8	24	IKKSNIFTESICTDNNCKTA	25.34	37.83	0	21	29	0	0	0	0
University of Alberta, PcDBP, 20 aa Linear Peptides (PEP20205061690)	9	24	IKKSNIFTESICTDNNCKTA	32.49	37.83	0	27	29	0
University of Alberta, PcDBP, 20 aa Linear Peptides (PEP20205061690)	2	20	INECKQKEKTEIHAWVCDEK	23.88	37.83	0	16	29	0	0	0	0
University of Alberta, PcDBP, 20 aa Linear Peptides (PEP20205061690)	3	20	INECKQKEKTEIHAWVCDEK	25.05	37.83	0	19	29	0
University of Alberta, PcDBP, 20 aa Linear Peptides (PEP20205061690)	2	49	INLCTNRLEIIPDKIEIKDN	28.16	37.83	0	25	29	0	1	1	1
University of Alberta, PcDBP, 20 aa Linear Peptides (PEP20205061690)	3	49	INLCTNRLEIIPDKIEIKDN	38.25	37.83	0.42	31	29	2
University of Alberta, PcDBP, 20 aa Linear Peptides (PEP20205061690)	10	36	INLDDDHYTGLCICSSTKAN	31.14	37.83	0	22	29	0	0	0	0
University of Alberta, PcDBP, 20 aa Linear Peptides (PEP20205061690)	11	36	INLDDDHYTGLCICSSTKAN	35.76	37.83	0	27	29	0
University of Alberta, PcDBP, 20 aa Linear Peptides (PEP20205061690)	8	19	INNKCIKKSNIFTESICTDN	24.6	37.83	0	16	29	0	0	0	0
University of Alberta, PcDBP, 20 aa Linear Peptides (PEP20205061690)	9	19	INNKCIKKSNIFTESICTDN	25.26	37.83	0	19	29	0
University of Alberta, PcDBP, 20 aa Linear Peptides (PEP20205061690)	8	51	INVNKSKWNTLLKSFANFKT	50.78	37.83	12.95	37	29	8	8.75	0.75	0.0857143
University of Alberta, PcDBP, 20 aa Linear Peptides (PEP20205061690)	9	51	INVNKSKWNTLLKSFANFKT	51.75	37.83	13.92	38.5	29	9.5
University of Alberta, PcDBP, 20 aa Linear Peptides (PEP20205061690)	2	59	IPDKIEIKDNEMKELLMDYF	41.37	37.83	3.54	33	29	4	2	2	1
University of Alberta, PcDBP, 20 aa Linear Peptides (PEP20205061690)	3	59	IPDKIEIKDNEMKELLMDYF	33.5	37.83	0	26	29	0
University of Alberta, PcDBP, 20 aa Linear Peptides (PEP20205061690)	8	5	IQEFSVQYFKEANKINNKCI	28.91	37.83	0	27	29	0	0	0	0
University of Alberta, PcDBP, 20 aa Linear Peptides (PEP20205061690)	9	5	IQEFSVQYFKEANKINNKCI	27.03	37.83	0	22	29	0
University of Alberta, PcDBP, 20 aa Linear Peptides (PEP20205061690)	6	6	IQNIFGTDDNAKRDRKIWWK	56.79	37.83	18.96	47	29	18	20.5	2.5	0.121951
University of Alberta, PcDBP, 20 aa Linear Peptides (PEP20205061690)	7	6	IQNIFGTDDNAKRDRKIWWK	51.73	37.83	13.9	52	29	23
University of Alberta, PcDBP, 20 aa Linear Peptides (PEP20205061690)	10	59	ITNSLNYNHAIESGSGSGSG	53.82	37.83	15.99	25	29	0	3	3	1
University of Alberta, PcDBP, 20 aa Linear Peptides (PEP20205061690)	11	59	ITNSLNYNHAIESGSGSGSG	38.52	37.83	0.68	35	29	6
University of Alberta, PcDBP, 20 aa Linear Peptides (PEP20205061690)	4	53	IVEGTGLKNVANENLLELKI	35.96	37.83	0	27	29	0	1	1	1
University of Alberta, PcDBP, 20 aa Linear Peptides (PEP20205061690)	5	53	IVEGTGLKNVANENLLELKI	39.42	37.83	1.59	31	29	2
University of Alberta, PcDBP, 20 aa Linear Peptides (PEP20205061690)	6	31	IWKAMVLGKDFNEASNYENI	39.54	37.83	1.71	29	29	0	0	0	0
University of Alberta, PcDBP, 20 aa Linear Peptides (PEP20205061690)	7	31	IWKAMVLGKDFNEASNYENI	36.76	37.83	0	27	29	0
University of Alberta, PcDBP, 20 aa Linear Peptides (PEP20205061690)	6	22	IWWKRHENIIWKAMVLGKDF	40.07	37.83	2.24	34	29	5	6	1	0.166667
University of Alberta, PcDBP, 20 aa Linear Peptides (PEP20205061690)	7	22	IWWKRHENIIWKAMVLGKDF	41.55	37.83	3.71	36	29	7
University of Alberta, PcDBP, 20 aa Linear Peptides (PEP20205061690)	4	16	IYEDAANEGKLLLNKYDDKN	43.66	37.83	5.83	37	29	8	9.5	1.5	0.157895
University of Alberta, PcDBP, 20 aa Linear Peptides (PEP20205061690)	5	16	IYEDAANEGKLLLNKYDDKN	49.24	37.83	11.4	40	29	11
University of Alberta, PcDBP, 20 aa Linear Peptides (PEP20205061690)	6	33	KAMVLGKDFNEASNYENICT	41.42	37.83	3.59	37	29	8	8.75	0.75	0.0857143
University of Alberta, PcDBP, 20 aa Linear Peptides (PEP20205061690)	7	33	KAMVLGKDFNEASNYENICT	43.36	37.83	5.53	38.5	29	9.5
University of Alberta, PcDBP, 20 aa Linear Peptides (PEP20205061690)	10	53	KANNTVITNSLNYNHAIESG	31.42	37.83	0	22	29	0	0	0	0
University of Alberta, PcDBP, 20 aa Linear Peptides (PEP20205061690)	11	53	KANNTVITNSLNYNHAIESG	27.73	37.83	0	14	29	0
University of Alberta, PcDBP, 20 aa Linear Peptides (PEP20205061690)	10	15	KAYNSLMIEFKEAYEVNFEN	22.68	37.83	0	10	29	0	0	0	0
University of Alberta, PcDBP, 20 aa Linear Peptides (PEP20205061690)	11	15	KAYNSLMIEFKEAYEVNFEN	27.58	37.83	0	21	29	0
University of Alberta, PcDBP, 20 aa Linear Peptides (PEP20205061690)	8	22	KCIKKSNIFTESICTDNNCK	51.06	37.83	13.23	35	29	6	3	3	1
University of Alberta, PcDBP, 20 aa Linear Peptides (PEP20205061690)	9	22	KCIKKSNIFTESICTDNNCK	31.64	37.83	0	27	29	0
University of Alberta, PcDBP, 20 aa Linear Peptides (PEP20205061690)	6	39	KDFNEASNYENICTNYKLED	33.11	37.83	0	23	29	0	4	4	1
University of Alberta, PcDBP, 20 aa Linear Peptides (PEP20205061690)	7	39	KDFNEASNYENICTNYKLED	41.11	37.83	3.27	37	29	8
University of Alberta, PcDBP, 20 aa Linear Peptides (PEP20205061690)	2	66	KDNEMKELLMDYFKKFIYED	29.01	37.83	0	22	29	0	0	0	0
University of Alberta, PcDBP, 20 aa Linear Peptides (PEP20205061690)	3	66	KDNEMKELLMDYFKKFIYED	27.05	37.83	0	23	29	0
University of Alberta, PcDBP, 20 aa Linear Peptides (PEP20205061690)	8	14	KEANKINNKCIKKSNIFTES	23.93	37.83	0	14	29	0	0	0	0
University of Alberta, PcDBP, 20 aa Linear Peptides (PEP20205061690)	9	14	KEANKINNKCIKKSNIFTES	39.39	37.83	1.56	27	29	0
University of Alberta, PcDBP, 20 aa Linear Peptides (PEP20205061690)	10	25	KEAYEVNFENVINLDDDHYT	51.25	37.83	13.42	40	29	11	6	5	0.833333
University of Alberta, PcDBP, 20 aa Linear Peptides (PEP20205061690)	11	25	KEAYEVNFENVINLDDDHYT	39.84	37.83	2	30	29	1
University of Alberta, PcDBP, 20 aa Linear Peptides (PEP20205061690)	2	26	KEKTEIHAWVCDEKKQNCAP	37.22	37.83	0	34	29	5	2.5	2.5	1
University of Alberta, PcDBP, 20 aa Linear Peptides (PEP20205061690)	3	26	KEKTEIHAWVCDEKKQNCAP	38.83	37.83	1	23	29	0
University of Alberta, PcDBP, 20 aa Linear Peptides (PEP20205061690)	4	5	KELLMDYFKKFIYEDAANEG	27.95	37.83	0	21	29	0	4	4	1
University of Alberta, PcDBP, 20 aa Linear Peptides (PEP20205061690)	5	5	KELLMDYFKKFIYEDAANEG	47.62	37.83	9.79	37	29	8
University of Alberta, PcDBP, 20 aa Linear Peptides (PEP20205061690)	2	12	KEYFDKYQINECKQKEKTEI	33.41	37.83	0	28	29	0	1	1	1
University of Alberta, PcDBP, 20 aa Linear Peptides (PEP20205061690)	3	12	KEYFDKYQINECKQKEKTEI	36.89	37.83	0	31	29	2
University of Alberta, PcDBP, 20 aa Linear Peptides (PEP20205061690)	4	14	KFIYEDAANEGKLLLNKYDD	60.05	37.83	22.21	25	29	0	0	0	0
University of Alberta, PcDBP, 20 aa Linear Peptides (PEP20205061690)	5	14	KFIYEDAANEGKLLLNKYDD	29.49	37.83	0	23	29	0
University of Alberta, PcDBP, 20 aa Linear Peptides (PEP20205061690)	2	62	KIEIKDNEMKELLMDYFKKF	31.71	37.83	0	19	29	0	0	0	0
University of Alberta, PcDBP, 20 aa Linear Peptides (PEP20205061690)	3	62	KIEIKDNEMKELLMDYFKKF	29.51	37.83	0	24	29	0
University of Alberta, PcDBP, 20 aa Linear Peptides (PEP20205061690)	8	18	KINNKCIKKSNIFTESICTD	24.15	37.83	0	19	29	0	0	0	0
University of Alberta, PcDBP, 20 aa Linear Peptides (PEP20205061690)	9	18	KINNKCIKKSNIFTESICTD	28.3	37.83	0	16	29	0
University of Alberta, PcDBP, 20 aa Linear Peptides (PEP20205061690)	6	5	KIQNIFGTDDNAKRDRKIWW	46.51	37.83	8.68	44	29	15	16.5	1.5	0.0909091
University of Alberta, PcDBP, 20 aa Linear Peptides (PEP20205061690)	7	5	KIQNIFGTDDNAKRDRKIWW	49.7	37.83	11.87	47	29	18
University of Alberta, PcDBP, 20 aa Linear Peptides (PEP20205061690)	6	21	KIWWKRHENIIWKAMVLGKD	29.28	37.83	0	26	29	0	0	0	0
University of Alberta, PcDBP, 20 aa Linear Peptides (PEP20205061690)	7	21	KIWWKRHENIIWKAMVLGKD	31.32	37.83	0	23	29	0
University of Alberta, PcDBP, 20 aa Linear Peptides (PEP20205061690)	4	13	KKFIYEDAANEGKLLLNKYD	29.12	37.83	0	24	29	0	0	0	0
University of Alberta, PcDBP, 20 aa Linear Peptides (PEP20205061690)	5	13	KKFIYEDAANEGKLLLNKYD	26.14	37.83	0	21	29	0
University of Alberta, PcDBP, 20 aa Linear Peptides (PEP20205061690)	2	39	KKQNCAPSRRINLCTNRLEI	33.02	37.83	0	29	29	0	5.5	5.5	1
University of Alberta, PcDBP, 20 aa Linear Peptides (PEP20205061690)	3	39	KKQNCAPSRRINLCTNRLEI	46.25	37.83	8.41	40	29	11
University of Alberta, PcDBP, 20 aa Linear Peptides (PEP20205061690)	8	25	KKSNIFTESICTDNNCKTAC	32.93	37.83	0	28	29	0	1	1	1
University of Alberta, PcDBP, 20 aa Linear Peptides (PEP20205061690)	9	25	KKSNIFTESICTDNNCKTAC	37.27	37.83	0	31	29	2
University of Alberta, PcDBP, 20 aa Linear Peptides (PEP20205061690)	6	55	KLEDHHSQIERWAREWIQEF	41.46	37.83	3.63	37	29	8	6.5	1.5	0.230769
University of Alberta, PcDBP, 20 aa Linear Peptides (PEP20205061690)	7	55	KLEDHHSQIERWAREWIQEF	37.21	37.83	0	34	29	5
University of Alberta, PcDBP, 20 aa Linear Peptides (PEP20205061690)	4	25	KLLLNKYDDKNNNEYCNDMV	27.96	37.83	0	25	29	0	1.5	1.5	1
University of Alberta, PcDBP, 20 aa Linear Peptides (PEP20205061690)	5	25	KLLLNKYDDKNNNEYCNDMV	35.02	37.83	0	32	29	3
University of Alberta, PcDBP, 20 aa Linear Peptides (PEP20205061690)	4	51	KNIVEGTGLKNVANENLLEL	32.78	37.83	0	22	29	0	1	1	1
University of Alberta, PcDBP, 20 aa Linear Peptides (PEP20205061690)	5	51	KNIVEGTGLKNVANENLLEL	37.86	37.83	0.03	31	29	2
University of Alberta, PcDBP, 20 aa Linear Peptides (PEP20205061690)	4	34	KNNNEYCNDMVNSFGDYKNI	39.39	37.83	1.56	35	29	6	6	0	0
University of Alberta, PcDBP, 20 aa Linear Peptides (PEP20205061690)	5	34	KNNNEYCNDMVNSFGDYKNI	42.25	37.83	4.41	35	29	6
University of Alberta, PcDBP, 20 aa Linear Peptides (PEP20205061690)	4	60	KNVANENLLELKIQNIFGTD	36.02	37.83	0	25	29	0	0	0	0
University of Alberta, PcDBP, 20 aa Linear Peptides (PEP20205061690)	5	60	KNVANENLLELKIQNIFGTD	32.88	37.83	0	21	29	0
University of Alberta, PcDBP, 20 aa Linear Peptides (PEP20205061690)	2	24	KQKEKTEIHAWVCDEKKQNC	26.18	37.83	0	21	29	0	0	0	0
University of Alberta, PcDBP, 20 aa Linear Peptides (PEP20205061690)	3	24	KQKEKTEIHAWVCDEKKQNC	28.55	37.83	0	23	29	0
University of Alberta, PcDBP, 20 aa Linear Peptides (PEP20205061690)	2	40	KQNCAPSRRINLCTNRLEII	35.35	37.83	0	26	29	0	1	1	1
University of Alberta, PcDBP, 20 aa Linear Peptides (PEP20205061690)	3	40	KQNCAPSRRINLCTNRLEII	35.44	37.83	0	31	29	2
University of Alberta, PcDBP, 20 aa Linear Peptides (PEP20205061690)	6	17	KRDRKIWWKRHENIIWKAMV	27.92	37.83	0	23	29	0	0	0	0
University of Alberta, PcDBP, 20 aa Linear Peptides (PEP20205061690)	7	17	KRDRKIWWKRHENIIWKAMV	21.01	37.83	0	10	29	0
University of Alberta, PcDBP, 20 aa Linear Peptides (PEP20205061690)	6	25	KRHENIIWKAMVLGKDFNEA	33.45	37.83	0	24	29	0	0	0	0
University of Alberta, PcDBP, 20 aa Linear Peptides (PEP20205061690)	7	25	KRHENIIWKAMVLGKDFNEA	31.56	37.83	0	27	29	0
University of Alberta, PcDBP, 20 aa Linear Peptides (PEP20205061690)	8	63	KSFANFKTDYFSEETCRDKA	21.19	37.83	0	12	29	0	0	0	0
University of Alberta, PcDBP, 20 aa Linear Peptides (PEP20205061690)	9	63	KSFANFKTDYFSEETCRDKA	27.52	37.83	0	14	29	0
University of Alberta, PcDBP, 20 aa Linear Peptides (PEP20205061690)	8	55	KSKWNTLLKSFANFKTDYFS	44.55	37.83	6.71	31	29	2	1	1	1
University of Alberta, PcDBP, 20 aa Linear Peptides (PEP20205061690)	9	55	KSKWNTLLKSFANFKTDYFS	26.28	37.83	0	16	29	0
University of Alberta, PcDBP, 20 aa Linear Peptides (PEP20205061690)	8	26	KSNIFTESICTDNNCKTACN	20.36	37.83	0	10	29	0	0	0	0
University of Alberta, PcDBP, 20 aa Linear Peptides (PEP20205061690)	9	26	KSNIFTESICTDNNCKTACN	34.85	37.83	0	25	29	0
University of Alberta, PcDBP, 20 aa Linear Peptides (PEP20205061690)	8	41	KTACNAYETWINVNKSKWNT	45.13	37.83	7.3	44	29	15	7.5	7.5	1
University of Alberta, PcDBP, 20 aa Linear Peptides (PEP20205061690)	9	41	KTACNAYETWINVNKSKWNT	34.75	37.83	0	26	29	0
University of Alberta, PcDBP, 20 aa Linear Peptides (PEP20205061690)	10	3	KTDYFSEETCRDKAYNSLMI	34.09	37.83	0	23	29	0	0	0	0
University of Alberta, PcDBP, 20 aa Linear Peptides (PEP20205061690)	11	3	KTDYFSEETCRDKAYNSLMI	25.62	37.83	0	19	29	0
University of Alberta, PcDBP, 20 aa Linear Peptides (PEP20205061690)	2	28	KTEIHAWVCDEKKQNCAPSR	35.03	37.83	0	33	29	4	2	2	1
University of Alberta, PcDBP, 20 aa Linear Peptides (PEP20205061690)	3	28	KTEIHAWVCDEKKQNCAPSR	26.83	37.83	0	21	29	0
University of Alberta, PcDBP, 20 aa Linear Peptides (PEP20205061690)	8	57	KWNTLLKSFANFKTDYFSEE	21.43	37.83	0	14	29	0	0	0	0
University of Alberta, PcDBP, 20 aa Linear Peptides (PEP20205061690)	9	57	KWNTLLKSFANFKTDYFSEE	39.2	37.83	1.37	20	29	0
University of Alberta, PcDBP, 20 aa Linear Peptides (PEP20205061690)	4	30	KYDDKNNNEYCNDMVNSFGD	23.93	37.83	0	19	29	0	0	0	0
University of Alberta, PcDBP, 20 aa Linear Peptides (PEP20205061690)	5	30	KYDDKNNNEYCNDMVNSFGD	28.44	37.83	0	21	29	0
University of Alberta, PcDBP, 20 aa Linear Peptides (PEP20205061690)	2	17	KYQINECKQKEKTEIHAWVC	33.79	37.83	0	31	29	2	1	1	1
University of Alberta, PcDBP, 20 aa Linear Peptides (PEP20205061690)	3	17	KYQINECKQKEKTEIHAWVC	28.69	37.83	0	24	29	0
University of Alberta, PcDBP, 20 aa Linear Peptides (PEP20205061690)	10	46	LCICSSTKANNTVITNSLNY	33.28	37.83	0	30	29	1	2.5	1.5	0.6
University of Alberta, PcDBP, 20 aa Linear Peptides (PEP20205061690)	11	46	LCICSSTKANNTVITNSLNY	40.67	37.83	2.84	33	29	4
University of Alberta, PcDBP, 20 aa Linear Peptides (PEP20205061690)	2	51	LCTNRLEIIPDKIEIKDNEM	40.14	37.83	2.31	31	29	2	1	1	1
University of Alberta, PcDBP, 20 aa Linear Peptides (PEP20205061690)	3	51	LCTNRLEIIPDKIEIKDNEM	28.66	37.83	0	23	29	0
University of Alberta, PcDBP, 20 aa Linear Peptides (PEP20205061690)	10	38	LDDDHYTGLCICSSTKANNT	41.41	37.83	3.58	32	29	3	1.5	1.5	1
University of Alberta, PcDBP, 20 aa Linear Peptides (PEP20205061690)	11	38	LDDDHYTGLCICSSTKANNT	28.71	37.83	0	21	29	0
University of Alberta, PcDBP, 20 aa Linear Peptides (PEP20205061690)	6	56	LEDHHSQIERWAREWIQEFS	27.65	37.83	0	23	29	0	0	0	0
University of Alberta, PcDBP, 20 aa Linear Peptides (PEP20205061690)	7	56	LEDHHSQIERWAREWIQEFS	30.94	37.83	0	21	29	0
University of Alberta, PcDBP, 20 aa Linear Peptides (PEP20205061690)	2	56	LEIIPDKIEIKDNEMKELLM	26.25	37.83	0	16	29	0	1	1	1
University of Alberta, PcDBP, 20 aa Linear Peptides (PEP20205061690)	3	56	LEIIPDKIEIKDNEMKELLM	37.75	37.83	0	31	29	2
University of Alberta, PcDBP, 20 aa Linear Peptides (PEP20205061690)	6	2	LELKIQNIFGTDDNAKRDRK	62.86	37.83	25.03	58	29	29	33.5	4.5	0.134328
University of Alberta, PcDBP, 20 aa Linear Peptides (PEP20205061690)	7	2	LELKIQNIFGTDDNAKRDRK	68.25	37.83	30.41	67	29	38
University of Alberta, PcDBP, 20 aa Linear Peptides (PEP20205061690)	6	37	LGKDFNEASNYENICTNYKL	39.76	37.83	1.93	40	29	11	18	7	0.388889
University of Alberta, PcDBP, 20 aa Linear Peptides (PEP20205061690)	7	37	LGKDFNEASNYENICTNYKL	236.12	37.83	198.28	54	29	25
University of Alberta, PcDBP, 20 aa Linear Peptides (PEP20205061690)	6	4	LKIQNIFGTDDNAKRDRKIW	70.19	37.83	32.36	67	29	38	36	2	0.0555556
University of Alberta, PcDBP, 20 aa Linear Peptides (PEP20205061690)	7	4	LKIQNIFGTDDNAKRDRKIW	73.25	37.83	35.41	63	29	34
University of Alberta, PcDBP, 20 aa Linear Peptides (PEP20205061690)	4	59	LKNVANENLLELKIQNIFGT	96.07	37.83	58.24	26	29	0	2	2	1
University of Alberta, PcDBP, 20 aa Linear Peptides (PEP20205061690)	5	59	LKNVANENLLELKIQNIFGT	35.62	37.83	0	33	29	4
University of Alberta, PcDBP, 20 aa Linear Peptides (PEP20205061690)	8	62	LKSFANFKTDYFSEETCRDK	30.15	37.83	0	27	29	0	0	0	0
University of Alberta, PcDBP, 20 aa Linear Peptides (PEP20205061690)	9	62	LKSFANFKTDYFSEETCRDK	24.04	37.83	0	16	29	0
University of Alberta, PcDBP, 20 aa Linear Peptides (PEP20205061690)	4	67	LLELKIQNIFGTDDNAKRDR	79.32	37.83	41.48	31	29	2	1	1	1
University of Alberta, PcDBP, 20 aa Linear Peptides (PEP20205061690)	5	67	LLELKIQNIFGTDDNAKRDR	35.22	37.83	0	24	29	0
University of Alberta, PcDBP, 20 aa Linear Peptides (PEP20205061690)	8	61	LLKSFANFKTDYFSEETCRD	35.74	37.83	0	27	29	0	0	0	0
University of Alberta, PcDBP, 20 aa Linear Peptides (PEP20205061690)	9	61	LLKSFANFKTDYFSEETCRD	32.36	37.83	0	27	29	0
University of Alberta, PcDBP, 20 aa Linear Peptides (PEP20205061690)	4	26	LLLNKYDDKNNNEYCNDMVN	28.35	37.83	0	25	29	0	0	0	0
University of Alberta, PcDBP, 20 aa Linear Peptides (PEP20205061690)	5	26	LLLNKYDDKNNNEYCNDMVN	25.35	37.83	0	19	29	0
University of Alberta, PcDBP, 20 aa Linear Peptides (PEP20205061690)	4	7	LLMDYFKKFIYEDAANEGKL	31.55	37.83	0	17.5	29	0	0	0	0
University of Alberta, PcDBP, 20 aa Linear Peptides (PEP20205061690)	5	7	LLMDYFKKFIYEDAANEGKL	25.43	37.83	0	20	29	0
University of Alberta, PcDBP, 20 aa Linear Peptides (PEP20205061690)	4	27	LLNKYDDKNNNEYCNDMVNS	23.3	37.83	0	16	29	0	0	0	0
University of Alberta, PcDBP, 20 aa Linear Peptides (PEP20205061690)	5	27	LLNKYDDKNNNEYCNDMVNS	19.46	37.83	0	11	29	0
University of Alberta, PcDBP, 20 aa Linear Peptides (PEP20205061690)	4	8	LMDYFKKFIYEDAANEGKLL	23.15	37.83	0	16	29	0	0	0	0
University of Alberta, PcDBP, 20 aa Linear Peptides (PEP20205061690)	5	8	LMDYFKKFIYEDAANEGKLL	27.45	37.83	0	21	29	0
University of Alberta, PcDBP, 20 aa Linear Peptides (PEP20205061690)	10	20	LMIEFKEAYEVNFENVINLD	41.83	37.83	4	31	29	2	1	1	1
University of Alberta, PcDBP, 20 aa Linear Peptides (PEP20205061690)	11	20	LMIEFKEAYEVNFENVINLD	22.24	37.83	0	14	29	0
University of Alberta, PcDBP, 20 aa Linear Peptides (PEP20205061690)	4	28	LNKYDDKNNNEYCNDMVNSF	33.56	37.83	0	31	29	2	1	1	1
University of Alberta, PcDBP, 20 aa Linear Peptides (PEP20205061690)	5	28	LNKYDDKNNNEYCNDMVNSF	30.88	37.83	0	24	29	0
University of Alberta, PcDBP, 20 aa Linear Peptides (PEP20205061690)	4	9	MDYFKKFIYEDAANEGKLLL	26.44	37.83	0	21	29	0	0	0	0
University of Alberta, PcDBP, 20 aa Linear Peptides (PEP20205061690)	5	9	MDYFKKFIYEDAANEGKLLL	28.45	37.83	0	19	29	0
University of Alberta, PcDBP, 20 aa Linear Peptides (PEP20205061690)	10	21	MIEFKEAYEVNFENVINLDD	28.75	37.83	0	26	29	0	0	0	0
University of Alberta, PcDBP, 20 aa Linear Peptides (PEP20205061690)	11	21	MIEFKEAYEVNFENVINLDD	32.65	37.83	0	29	29	0
University of Alberta, PcDBP, 20 aa Linear Peptides (PEP20205061690)	4	4	MKELLMDYFKKFIYEDAANE	29.18	37.83	0	21	29	0	0	0	0
University of Alberta, PcDBP, 20 aa Linear Peptides (PEP20205061690)	5	4	MKELLMDYFKKFIYEDAANE	29.97	37.83	0	23	29	0
University of Alberta, PcDBP, 20 aa Linear Peptides (PEP20205061690)	6	35	MVLGKDFNEASNYENICTNY	32.98	37.83	0	25	29	0	4.75	4.75	1
University of Alberta, PcDBP, 20 aa Linear Peptides (PEP20205061690)	7	35	MVLGKDFNEASNYENICTNY	38.21	37.83	0.37	38.5	29	9.5
University of Alberta, PcDBP, 20 aa Linear Peptides (PEP20205061690)	4	43	MVNSFGDYKNIVEGTGLKNV	38.06	37.83	0.23	31	29	2	6.5	4.5	0.692308
University of Alberta, PcDBP, 20 aa Linear Peptides (PEP20205061690)	5	43	MVNSFGDYKNIVEGTGLKNV	64.62	37.83	26.79	40	29	11
University of Alberta, PcDBP, 20 aa Linear Peptides (PEP20205061690)	6	15	NAKRDRKIWWKRHENIIWKA	25.42	37.83	0	19	29	0	0	0	0
University of Alberta, PcDBP, 20 aa Linear Peptides (PEP20205061690)	7	15	NAKRDRKIWWKRHENIIWKA	24.81	37.83	0	16	29	0
University of Alberta, PcDBP, 20 aa Linear Peptides (PEP20205061690)	8	45	NAYETWINVNKSKWNTLLKS	50.04	37.83	12.21	41	29	12	14.5	2.5	0.172414
University of Alberta, PcDBP, 20 aa Linear Peptides (PEP20205061690)	9	45	NAYETWINVNKSKWNTLLKS	78.22	37.83	40.39	46	29	17
University of Alberta, PcDBP, 20 aa Linear Peptides (PEP20205061690)	2	42	NCAPSRRINLCTNRLEIIPD	32.84	37.83	0	28	29	0	4	4	1
University of Alberta, PcDBP, 20 aa Linear Peptides (PEP20205061690)	3	42	NCAPSRRINLCTNRLEIIPD	51.06	37.83	13.23	37	29	8
University of Alberta, PcDBP, 20 aa Linear Peptides (PEP20205061690)	8	39	NCKTACNAYETWINVNKSKW	43.85	37.83	6.02	42	29	13	6.5	6.5	1
University of Alberta, PcDBP, 20 aa Linear Peptides (PEP20205061690)	9	39	NCKTACNAYETWINVNKSKW	34.32	37.83	0	25	29	0
University of Alberta, PcDBP, 20 aa Linear Peptides (PEP20205061690)	4	41	NDMVNSFGDYKNIVEGTGLK	43.11	37.83	5.27	40	29	11	14	3	0.214286
University of Alberta, PcDBP, 20 aa Linear Peptides (PEP20205061690)	5	41	NDMVNSFGDYKNIVEGTGLK	74.05	37.83	36.22	46	29	17
University of Alberta, PcDBP, 20 aa Linear Peptides (PEP20205061690)	6	42	NEASNYENICTNYKLEDHHS	48.19	37.83	10.36	45	29	16	8	8	1
University of Alberta, PcDBP, 20 aa Linear Peptides (PEP20205061690)	7	42	NEASNYENICTNYKLEDHHS	37.78	37.83	0	29	29	0
University of Alberta, PcDBP, 20 aa Linear Peptides (PEP20205061690)	2	21	NECKQKEKTEIHAWVCDEKK	33.25	37.83	0	29	29	0	0	0	0
University of Alberta, PcDBP, 20 aa Linear Peptides (PEP20205061690)	3	21	NECKQKEKTEIHAWVCDEKK	28.86	37.83	0	23	29	0
University of Alberta, PcDBP, 20 aa Linear Peptides (PEP20205061690)	4	22	NEGKLLLNKYDDKNNNEYCN	23.63	37.83	0	19	29	0	0	0	0
University of Alberta, PcDBP, 20 aa Linear Peptides (PEP20205061690)	5	22	NEGKLLLNKYDDKNNNEYCN	27.69	37.83	0	22	29	0
University of Alberta, PcDBP, 20 aa Linear Peptides (PEP20205061690)	4	2	NEMKELLMDYFKKFIYEDAA	37.71	37.83	0	29	29	0	0	0	0
University of Alberta, PcDBP, 20 aa Linear Peptides (PEP20205061690)	5	2	NEMKELLMDYFKKFIYEDAA	33.68	37.83	0	27	29	0
University of Alberta, PcDBP, 20 aa Linear Peptides (PEP20205061690)	4	64	NENLLELKIQNIFGTDDNAK	23.74	37.83	0	16	29	0	0	0	0
University of Alberta, PcDBP, 20 aa Linear Peptides (PEP20205061690)	5	64	NENLLELKIQNIFGTDDNAK	19.71	37.83	0	10	29	0
University of Alberta, PcDBP, 20 aa Linear Peptides (PEP20205061690)	4	37	NEYCNDMVNSFGDYKNIVEG	31.95	37.83	0	23	29	0	2	2	1
University of Alberta, PcDBP, 20 aa Linear Peptides (PEP20205061690)	5	37	NEYCNDMVNSFGDYKNIVEG	37.85	37.83	0.02	33	29	4
University of Alberta, PcDBP, 20 aa Linear Peptides (PEP20205061690)	10	31	NFENVINLDDDHYTGLCICS	33.76	37.83	0	29	29	0	0	0	0
University of Alberta, PcDBP, 20 aa Linear Peptides (PEP20205061690)	11	31	NFENVINLDDDHYTGLCICS	47.45	37.83	9.62	29	29	0
University of Alberta, PcDBP, 20 aa Linear Peptides (PEP20205061690)	8	67	NFKTDYFSEETCRDKAYNSL	40.89	37.83	3.06	27	29	0	0	0	0
University of Alberta, PcDBP, 20 aa Linear Peptides (PEP20205061690)	9	67	NFKTDYFSEETCRDKAYNSL	38.36	37.83	0.53	27	29	0
University of Alberta, PcDBP, 20 aa Linear Peptides (PEP20205061690)	6	49	NICTNYKLEDHHSQIERWAR	51.25	37.83	13.41	48	29	19	11.5	7.5	0.652174
University of Alberta, PcDBP, 20 aa Linear Peptides (PEP20205061690)	7	49	NICTNYKLEDHHSQIERWAR	46.29	37.83	8.46	33	29	4
University of Alberta, PcDBP, 20 aa Linear Peptides (PEP20205061690)	6	8	NIFGTDDNAKRDRKIWWKRH	46.78	37.83	8.94	46	29	17	9.5	7.5	0.789474
University of Alberta, PcDBP, 20 aa Linear Peptides (PEP20205061690)	7	8	NIFGTDDNAKRDRKIWWKRH	36.45	37.83	0	31	29	2
University of Alberta, PcDBP, 20 aa Linear Peptides (PEP20205061690)	8	28	NIFTESICTDNNCKTACNAY	36.07	37.83	0	27	29	0	0	0	0
University of Alberta, PcDBP, 20 aa Linear Peptides (PEP20205061690)	9	28	NIFTESICTDNNCKTACNAY	39.94	37.83	2.1	25	29	0
University of Alberta, PcDBP, 20 aa Linear Peptides (PEP20205061690)	6	29	NIIWKAMVLGKDFNEASNYE	36.08	37.83	0	31	29	2	1	1	1
University of Alberta, PcDBP, 20 aa Linear Peptides (PEP20205061690)	7	29	NIIWKAMVLGKDFNEASNYE	32.38	37.83	0	27	29	0
University of Alberta, PcDBP, 20 aa Linear Peptides (PEP20205061690)	4	52	NIVEGTGLKNVANENLLELK	32.79	37.83	0	26	29	0	3	3	1
University of Alberta, PcDBP, 20 aa Linear Peptides (PEP20205061690)	5	52	NIVEGTGLKNVANENLLELK	47.41	37.83	9.57	35	29	6
University of Alberta, PcDBP, 20 aa Linear Peptides (PEP20205061690)	8	21	NKCIKKSNIFTESICTDNNC	67.77	37.83	29.94	19	29	0	0	0	0
University of Alberta, PcDBP, 20 aa Linear Peptides (PEP20205061690)	9	21	NKCIKKSNIFTESICTDNNC	32.28	37.83	0	29	29	0
University of Alberta, PcDBP, 20 aa Linear Peptides (PEP20205061690)	8	17	NKINNKCIKKSNIFTESICT	21.15	37.83	0	12	29	0	0	0	0
University of Alberta, PcDBP, 20 aa Linear Peptides (PEP20205061690)	9	17	NKINNKCIKKSNIFTESICT	21.78	37.83	0	12	29	0
University of Alberta, PcDBP, 20 aa Linear Peptides (PEP20205061690)	8	54	NKSKWNTLLKSFANFKTDYF	29.72	37.83	0	21	29	0	0	0	0
University of Alberta, PcDBP, 20 aa Linear Peptides (PEP20205061690)	9	54	NKSKWNTLLKSFANFKTDYF	32.61	37.83	0	27	29	0
University of Alberta, PcDBP, 20 aa Linear Peptides (PEP20205061690)	4	29	NKYDDKNNNEYCNDMVNSFG	40.15	37.83	2.32	36	29	7	5.5	1.5	0.272727
University of Alberta, PcDBP, 20 aa Linear Peptides (PEP20205061690)	5	29	NKYDDKNNNEYCNDMVNSFG	38.81	37.83	0.98	33	29	4
University of Alberta, PcDBP, 20 aa Linear Peptides (PEP20205061690)	2	50	NLCTNRLEIIPDKIEIKDNE	27.39	37.83	0	17.5	29	0	0	0	0
University of Alberta, PcDBP, 20 aa Linear Peptides (PEP20205061690)	3	50	NLCTNRLEIIPDKIEIKDNE	25.48	37.83	0	25	29	0
University of Alberta, PcDBP, 20 aa Linear Peptides (PEP20205061690)	10	37	NLDDDHYTGLCICSSTKANN	28.71	37.83	0	23	29	0	0	0	0
University of Alberta, PcDBP, 20 aa Linear Peptides (PEP20205061690)	11	37	NLDDDHYTGLCICSSTKANN	31.46	37.83	0	27	29	0
University of Alberta, PcDBP, 20 aa Linear Peptides (PEP20205061690)	4	66	NLLELKIQNIFGTDDNAKRD	19.28	37.83	0	7	29	0	0	0	0
University of Alberta, PcDBP, 20 aa Linear Peptides (PEP20205061690)	5	66	NLLELKIQNIFGTDDNAKRD	23.67	37.83	0	16	29	0
University of Alberta, PcDBP, 20 aa Linear Peptides (PEP20205061690)	8	38	NNCKTACNAYETWINVNKSK	64.92	37.83	27.08	35	29	6	8.5	2.5	0.294118
University of Alberta, PcDBP, 20 aa Linear Peptides (PEP20205061690)	9	38	NNCKTACNAYETWINVNKSK	52.11	37.83	14.27	40	29	11
University of Alberta, PcDBP, 20 aa Linear Peptides (PEP20205061690)	4	36	NNEYCNDMVNSFGDYKNIVE	32.16	37.83	0	27	29	0	4	4	1
University of Alberta, PcDBP, 20 aa Linear Peptides (PEP20205061690)	5	36	NNEYCNDMVNSFGDYKNIVE	41.8	37.83	3.97	37	29	8
University of Alberta, PcDBP, 20 aa Linear Peptides (PEP20205061690)	8	20	NNKCIKKSNIFTESICTDNN	34.44	37.83	0	25	29	0	0	0	0
University of Alberta, PcDBP, 20 aa Linear Peptides (PEP20205061690)	9	20	NNKCIKKSNIFTESICTDNN	26.76	37.83	0	21	29	0
University of Alberta, PcDBP, 20 aa Linear Peptides (PEP20205061690)	4	35	NNNEYCNDMVNSFGDYKNIV	33.43	37.83	0	31	29	2	7.5	5.5	0.733333
University of Alberta, PcDBP, 20 aa Linear Peptides (PEP20205061690)	5	35	NNNEYCNDMVNSFGDYKNIV	59.75	37.83	21.92	42	29	13
University of Alberta, PcDBP, 20 aa Linear Peptides (PEP20205061690)	10	55	NNTVITNSLNYNHAIESGSG	44.14	37.83	6.31	23	29	0	0	0	0
University of Alberta, PcDBP, 20 aa Linear Peptides (PEP20205061690)	11	55	NNTVITNSLNYNHAIESGSG	38.34	37.83	0.51	26	29	0
University of Alberta, PcDBP, 20 aa Linear Peptides (PEP20205061690)	2	54	NRLEIIPDKIEIKDNEMKEL	27.13	37.83	0	16	29	0	1	1	1
University of Alberta, PcDBP, 20 aa Linear Peptides (PEP20205061690)	3	54	NRLEIIPDKIEIKDNEMKEL	39.28	37.83	1.45	31	29	2
University of Alberta, PcDBP, 20 aa Linear Peptides (PEP20205061690)	4	45	NSFGDYKNIVEGTGLKNVAN	39.9	37.83	2.07	31	29	2	2	0	0
University of Alberta, PcDBP, 20 aa Linear Peptides (PEP20205061690)	5	45	NSFGDYKNIVEGTGLKNVAN	36.3	37.83	0	31	29	2
University of Alberta, PcDBP, 20 aa Linear Peptides (PEP20205061690)	10	18	NSLMIEFKEAYEVNFENVIN	26.98	37.83	0	21	29	0	0	0	0
University of Alberta, PcDBP, 20 aa Linear Peptides (PEP20205061690)	11	18	NSLMIEFKEAYEVNFENVIN	18.18	37.83	0	12	29	0
University of Alberta, PcDBP, 20 aa Linear Peptides (PEP20205061690)	8	59	NTLLKSFANFKTDYFSEETC	28.73	37.83	0	19	29	0	0	0	0
University of Alberta, PcDBP, 20 aa Linear Peptides (PEP20205061690)	9	59	NTLLKSFANFKTDYFSEETC	48.05	37.83	10.22	27	29	0
University of Alberta, PcDBP, 20 aa Linear Peptides (PEP20205061690)	10	56	NTVITNSLNYNHAIESGSGS	25.49	37.83	0	14	29	0	1.5	1.5	1
University of Alberta, PcDBP, 20 aa Linear Peptides (PEP20205061690)	11	56	NTVITNSLNYNHAIESGSGS	54.61	37.83	16.77	32	29	3
University of Alberta, PcDBP, 20 aa Linear Peptides (PEP20205061690)	4	61	NVANENLLELKIQNIFGTDD	34.7	37.83	0	28	29	0	5.5	5.5	1
University of Alberta, PcDBP, 20 aa Linear Peptides (PEP20205061690)	5	61	NVANENLLELKIQNIFGTDD	72.59	37.83	34.76	40	29	11
University of Alberta, PcDBP, 20 aa Linear Peptides (PEP20205061690)	10	34	NVINLDDDHYTGLCICSSTK	41.16	37.83	3.33	31	29	2	1	1	1
University of Alberta, PcDBP, 20 aa Linear Peptides (PEP20205061690)	11	34	NVINLDDDHYTGLCICSSTK	30.52	37.83	0	25	29	0
University of Alberta, PcDBP, 20 aa Linear Peptides (PEP20205061690)	8	52	NVNKSKWNTLLKSFANFKTD	53.17	37.83	15.34	37	29	8	7	1	0.142857
University of Alberta, PcDBP, 20 aa Linear Peptides (PEP20205061690)	9	52	NVNKSKWNTLLKSFANFKTD	41.23	37.83	3.4	35	29	6
University of Alberta, PcDBP, 20 aa Linear Peptides (PEP20205061690)	6	46	NYENICTNYKLEDHHSQIER	47.08	37.83	9.25	40	29	11	13	2	0.153846
University of Alberta, PcDBP, 20 aa Linear Peptides (PEP20205061690)	7	46	NYENICTNYKLEDHHSQIER	45.56	37.83	7.73	44	29	15
University of Alberta, PcDBP, 20 aa Linear Peptides (PEP20205061690)	2	10	NYKEYFDKYQINECKQKEKT	60.94	37.83	23.1	52	29	23	24	1	0.0416667
University of Alberta, PcDBP, 20 aa Linear Peptides (PEP20205061690)	3	10	NYKEYFDKYQINECKQKEKT	80.98	37.83	43.15	54	29	25
University of Alberta, PcDBP, 20 aa Linear Peptides (PEP20205061690)	6	53	NYKLEDHHSQIERWAREWIQ	51.52	37.83	13.68	40	29	11	9.5	1.5	0.157895
University of Alberta, PcDBP, 20 aa Linear Peptides (PEP20205061690)	7	53	NYKLEDHHSQIERWAREWIQ	38.18	37.83	0.35	37	29	8
University of Alberta, PcDBP, 20 aa Linear Peptides (PEP20205061690)	2	60	PDKIEIKDNEMKELLMDYFK	26.48	37.83	0	14	29	0	0	0	0
University of Alberta, PcDBP, 20 aa Linear Peptides (PEP20205061690)	3	60	PDKIEIKDNEMKELLMDYFK	38.38	37.83	0.55	24	29	0
University of Alberta, PcDBP, 20 aa Linear Peptides (PEP20205061690)	2	45	PSRRINLCTNRLEIIPDKIE	31.36	37.83	0	31	29	2	2	0	0
University of Alberta, PcDBP, 20 aa Linear Peptides (PEP20205061690)	3	45	PSRRINLCTNRLEIIPDKIE	33.31	37.83	0	31	29	2
University of Alberta, PcDBP, 20 aa Linear Peptides (PEP20205061690)	8	6	QEFSVQYFKEANKINNKCIK	34.44	37.83	0	23	29	0	12.5	12.5	1
University of Alberta, PcDBP, 20 aa Linear Peptides (PEP20205061690)	9	6	QEFSVQYFKEANKINNKCIK	70.45	37.83	32.61	54	29	25
University of Alberta, PcDBP, 20 aa Linear Peptides (PEP20205061690)	6	62	QIERWAREWIQEFSVQYFKE	30.18	37.83	0	27	29	0	0	0	0
University of Alberta, PcDBP, 20 aa Linear Peptides (PEP20205061690)	7	62	QIERWAREWIQEFSVQYFKE	31.9	37.83	0	29	29	0
University of Alberta, PcDBP, 20 aa Linear Peptides (PEP20205061690)	2	19	QINECKQKEKTEIHAWVCDE	32.11	37.83	0	29	29	0	1	1	1
University of Alberta, PcDBP, 20 aa Linear Peptides (PEP20205061690)	3	19	QINECKQKEKTEIHAWVCDE	35.31	37.83	0	31	29	2
University of Alberta, PcDBP, 20 aa Linear Peptides (PEP20205061690)	2	25	QKEKTEIHAWVCDEKKQNCA	26.51	37.83	0	19	29	0	0	0	0
University of Alberta, PcDBP, 20 aa Linear Peptides (PEP20205061690)	3	25	QKEKTEIHAWVCDEKKQNCA	29.39	37.83	0	23	29	0
University of Alberta, PcDBP, 20 aa Linear Peptides (PEP20205061690)	2	41	QNCAPSRRINLCTNRLEIIP	42.45	37.83	4.61	36	29	7	7.5	0.5	0.0666667
University of Alberta, PcDBP, 20 aa Linear Peptides (PEP20205061690)	3	41	QNCAPSRRINLCTNRLEIIP	58.81	37.83	20.97	37	29	8
University of Alberta, PcDBP, 20 aa Linear Peptides (PEP20205061690)	6	7	QNIFGTDDNAKRDRKIWWKR	44.81	37.83	6.98	43	29	14	14	0	0
University of Alberta, PcDBP, 20 aa Linear Peptides (PEP20205061690)	7	7	QNIFGTDDNAKRDRKIWWKR	45.76	37.83	7.93	43	29	14
University of Alberta, PcDBP, 20 aa Linear Peptides (PEP20205061690)	8	11	QYFKEANKINNKCIKKSNIF	26.54	37.83	0	21	29	0	9.5	9.5	1
University of Alberta, PcDBP, 20 aa Linear Peptides (PEP20205061690)	9	11	QYFKEANKINNKCIKKSNIF	76.62	37.83	38.79	48	29	19
University of Alberta, PcDBP, 20 aa Linear Peptides (PEP20205061690)	10	13	RDKAYNSLMIEFKEAYEVNF	31.34	37.83	0	29	29	0	0	0	0
University of Alberta, PcDBP, 20 aa Linear Peptides (PEP20205061690)	11	13	RDKAYNSLMIEFKEAYEVNF	33.49	37.83	0	29	29	0
University of Alberta, PcDBP, 20 aa Linear Peptides (PEP20205061690)	6	18	RDRKIWWKRHENIIWKAMVL	28.59	37.83	0	21	29	0	0	0	0
University of Alberta, PcDBP, 20 aa Linear Peptides (PEP20205061690)	7	18	RDRKIWWKRHENIIWKAMVL	26.08	37.83	0	23	29	0
University of Alberta, PcDBP, 20 aa Linear Peptides (PEP20205061690)	8	2	REWIQEFSVQYFKEANKINN	25.08	37.83	0	16	29	0	0	0	0
University of Alberta, PcDBP, 20 aa Linear Peptides (PEP20205061690)	9	2	REWIQEFSVQYFKEANKINN	27.38	37.83	0	19	29	0
University of Alberta, PcDBP, 20 aa Linear Peptides (PEP20205061690)	6	26	RHENIIWKAMVLGKDFNEAS	22.58	37.83	0	14	29	0	0	0	0
University of Alberta, PcDBP, 20 aa Linear Peptides (PEP20205061690)	7	26	RHENIIWKAMVLGKDFNEAS	30.8	37.83	0	24	29	0
University of Alberta, PcDBP, 20 aa Linear Peptides (PEP20205061690)	2	48	RINLCTNRLEIIPDKIEIKD	23.76	37.83	0	14	29	0	0	0	0
University of Alberta, PcDBP, 20 aa Linear Peptides (PEP20205061690)	3	48	RINLCTNRLEIIPDKIEIKD	38.19	37.83	0.36	29	29	0
University of Alberta, PcDBP, 20 aa Linear Peptides (PEP20205061690)	6	20	RKIWWKRHENIIWKAMVLGK	35.26	37.83	0	33	29	4	2	2	1
University of Alberta, PcDBP, 20 aa Linear Peptides (PEP20205061690)	7	20	RKIWWKRHENIIWKAMVLGK	30.02	37.83	0	26	29	0
University of Alberta, PcDBP, 20 aa Linear Peptides (PEP20205061690)	2	55	RLEIIPDKIEIKDNEMKELL	25.37	37.83	0	21	29	0	0	0	0
University of Alberta, PcDBP, 20 aa Linear Peptides (PEP20205061690)	3	55	RLEIIPDKIEIKDNEMKELL	28.61	37.83	0	20	29	0
University of Alberta, PcDBP, 20 aa Linear Peptides (PEP20205061690)	2	47	RRINLCTNRLEIIPDKIEIK	41.75	37.83	3.91	37	29	8	7	1	0.142857
University of Alberta, PcDBP, 20 aa Linear Peptides (PEP20205061690)	3	47	RRINLCTNRLEIIPDKIEIK	40.95	37.83	3.12	35	29	6
University of Alberta, PcDBP, 20 aa Linear Peptides (PEP20205061690)	6	65	RWAREWIQEFSVQYFKEANK	28.95	37.83	0	21	29	0	0	0	0
University of Alberta, PcDBP, 20 aa Linear Peptides (PEP20205061690)	7	65	RWAREWIQEFSVQYFKEANK	31.56	37.83	0	21	29	0
University of Alberta, PcDBP, 20 aa Linear Peptides (PEP20205061690)	10	8	SEETCRDKAYNSLMIEFKEA	25.28	37.83	0	21	29	0	0	0	0
University of Alberta, PcDBP, 20 aa Linear Peptides (PEP20205061690)	11	8	SEETCRDKAYNSLMIEFKEA	24.09	37.83	0	16	29	0
University of Alberta, PcDBP, 20 aa Linear Peptides (PEP20205061690)	8	64	SFANFKTDYFSEETCRDKAY	26.16	37.83	0	19	29	0	0	0	0
University of Alberta, PcDBP, 20 aa Linear Peptides (PEP20205061690)	9	64	SFANFKTDYFSEETCRDKAY	36.36	37.83	0	29	29	0
University of Alberta, PcDBP, 20 aa Linear Peptides (PEP20205061690)	4	46	SFGDYKNIVEGTGLKNVANE	57.74	37.83	19.9	33	29	4	2	2	1
University of Alberta, PcDBP, 20 aa Linear Peptides (PEP20205061690)	5	46	SFGDYKNIVEGTGLKNVANE	40.04	37.83	2.21	27	29	0
University of Alberta, PcDBP, 20 aa Linear Peptides (PEP20205061690)	2	3	SGSGSGVNYKEYFDKYQINE	48.89	37.83	11.06	46	29	17	15	2	0.133333
University of Alberta, PcDBP, 20 aa Linear Peptides (PEP20205061690)	3	3	SGSGSGVNYKEYFDKYQINE	47.04	37.83	9.2	42	29	13
University of Alberta, PcDBP, 20 aa Linear Peptides (PEP20205061690)	2	5	SGSGVNYKEYFDKYQINECK	55.44	37.83	17.6	46	29	17	12.5	4.5	0.36
University of Alberta, PcDBP, 20 aa Linear Peptides (PEP20205061690)	3	5	SGSGVNYKEYFDKYQINECK	39.51	37.83	1.67	37	29	8
University of Alberta, PcDBP, 20 aa Linear Peptides (PEP20205061690)	2	7	SGVNYKEYFDKYQINECKQK	79.14	37.83	41.3	55	29	26	24.5	1.5	0.0612245
University of Alberta, PcDBP, 20 aa Linear Peptides (PEP20205061690)	3	7	SGVNYKEYFDKYQINECKQK	81.7	37.83	43.86	52	29	23
University of Alberta, PcDBP, 20 aa Linear Peptides (PEP20205061690)	8	33	SICTDNNCKTACNAYETWIN	38.71	37.83	0.87	31	29	2	1	1	1
University of Alberta, PcDBP, 20 aa Linear Peptides (PEP20205061690)	9	33	SICTDNNCKTACNAYETWIN	32.74	37.83	0	28	29	0
University of Alberta, PcDBP, 20 aa Linear Peptides (PEP20205061690)	8	56	SKWNTLLKSFANFKTDYFSE	89.83	37.83	52	33	29	4	2	2	1
University of Alberta, PcDBP, 20 aa Linear Peptides (PEP20205061690)	9	56	SKWNTLLKSFANFKTDYFSE	31.64	37.83	0	23	29	0
University of Alberta, PcDBP, 20 aa Linear Peptides (PEP20205061690)	10	19	SLMIEFKEAYEVNFENVINL	31.34	37.83	0	19	29	0	0	0	0
University of Alberta, PcDBP, 20 aa Linear Peptides (PEP20205061690)	11	19	SLMIEFKEAYEVNFENVINL	24.55	37.83	0	19	29	0
University of Alberta, PcDBP, 20 aa Linear Peptides (PEP20205061690)	8	27	SNIFTESICTDNNCKTACNA	31.38	37.83	0	23	29	0	0	0	0
University of Alberta, PcDBP, 20 aa Linear Peptides (PEP20205061690)	9	27	SNIFTESICTDNNCKTACNA	25.04	37.83	0	21	29	0
University of Alberta, PcDBP, 20 aa Linear Peptides (PEP20205061690)	6	45	SNYENICTNYKLEDHHSQIE	43.32	37.83	5.48	28	29	0	0	0	0
University of Alberta, PcDBP, 20 aa Linear Peptides (PEP20205061690)	7	45	SNYENICTNYKLEDHHSQIE	34.79	37.83	0	29	29	0
University of Alberta, PcDBP, 20 aa Linear Peptides (PEP20205061690)	6	61	SQIERWAREWIQEFSVQYFK	28.86	37.83	0	23	29	0	0	0	0
University of Alberta, PcDBP, 20 aa Linear Peptides (PEP20205061690)	7	61	SQIERWAREWIQEFSVQYFK	27.11	37.83	0	21	29	0
University of Alberta, PcDBP, 20 aa Linear Peptides (PEP20205061690)	2	46	SRRINLCTNRLEIIPDKIEI	24.48	37.83	0	19	29	0	0	0	0
University of Alberta, PcDBP, 20 aa Linear Peptides (PEP20205061690)	3	46	SRRINLCTNRLEIIPDKIEI	28.01	37.83	0	20	29	0
University of Alberta, PcDBP, 20 aa Linear Peptides (PEP20205061690)	10	50	SSTKANNTVITNSLNYNHAI	45.88	37.83	8.04	33	29	4	4	0	0
University of Alberta, PcDBP, 20 aa Linear Peptides (PEP20205061690)	11	50	SSTKANNTVITNSLNYNHAI	38.36	37.83	0.53	33	29	4
University of Alberta, PcDBP, 20 aa Linear Peptides (PEP20205061690)	10	51	STKANNTVITNSLNYNHAIE	37.86	37.83	0.03	28	29	0	0	0	0
University of Alberta, PcDBP, 20 aa Linear Peptides (PEP20205061690)	11	51	STKANNTVITNSLNYNHAIE	42.12	37.83	4.28	25	29	0
University of Alberta, PcDBP, 20 aa Linear Peptides (PEP20205061690)	8	9	SVQYFKEANKINNKCIKKSN	131.02	37.83	93.19	109	29	80	79.5	0.5	0.00628931
University of Alberta, PcDBP, 20 aa Linear Peptides (PEP20205061690)	9	9	SVQYFKEANKINNKCIKKSN	114.03	37.83	76.2	108	29	79
University of Alberta, PcDBP, 20 aa Linear Peptides (PEP20205061690)	8	42	TACNAYETWINVNKSKWNTL	56.73	37.83	18.9	46	29	17	14.5	2.5	0.172414
University of Alberta, PcDBP, 20 aa Linear Peptides (PEP20205061690)	9	42	TACNAYETWINVNKSKWNTL	50.24	37.83	12.41	41	29	12
University of Alberta, PcDBP, 20 aa Linear Peptides (PEP20205061690)	10	11	TCRDKAYNSLMIEFKEAYEV	26.95	37.83	0	24	29	0	0	0	0
University of Alberta, PcDBP, 20 aa Linear Peptides (PEP20205061690)	11	11	TCRDKAYNSLMIEFKEAYEV	27.36	37.83	0	25	29	0
University of Alberta, PcDBP, 20 aa Linear Peptides (PEP20205061690)	6	12	TDDNAKRDRKIWWKRHENII	31.06	37.83	0	27	29	0	0	0	0
University of Alberta, PcDBP, 20 aa Linear Peptides (PEP20205061690)	7	12	TDDNAKRDRKIWWKRHENII	26.71	37.83	0	25	29	0
University of Alberta, PcDBP, 20 aa Linear Peptides (PEP20205061690)	8	36	TDNNCKTACNAYETWINVNK	44.14	37.83	6.31	31	29	2	5	3	0.6
University of Alberta, PcDBP, 20 aa Linear Peptides (PEP20205061690)	9	36	TDNNCKTACNAYETWINVNK	41.43	37.83	3.6	37	29	8
University of Alberta, PcDBP, 20 aa Linear Peptides (PEP20205061690)	10	4	TDYFSEETCRDKAYNSLMIE	26.99	37.83	0	23	29	0	2	2	1
University of Alberta, PcDBP, 20 aa Linear Peptides (PEP20205061690)	11	4	TDYFSEETCRDKAYNSLMIE	34.81	37.83	0	33	29	4
University of Alberta, PcDBP, 20 aa Linear Peptides (PEP20205061690)	2	29	TEIHAWVCDEKKQNCAPSRR	35.41	37.83	0	31	29	2	5	3	0.6
University of Alberta, PcDBP, 20 aa Linear Peptides (PEP20205061690)	3	29	TEIHAWVCDEKKQNCAPSRR	40.58	37.83	2.75	37	29	8
University of Alberta, PcDBP, 20 aa Linear Peptides (PEP20205061690)	8	31	TESICTDNNCKTACNAYETW	35.83	37.83	0	29	29	0	3.5	3.5	1
University of Alberta, PcDBP, 20 aa Linear Peptides (PEP20205061690)	9	31	TESICTDNNCKTACNAYETW	53.26	37.83	15.43	36	29	7
University of Alberta, PcDBP, 20 aa Linear Peptides (PEP20205061690)	10	44	TGLCICSSTKANNTVITNSL	37.12	37.83	0	33	29	4	2	2	1
University of Alberta, PcDBP, 20 aa Linear Peptides (PEP20205061690)	11	44	TGLCICSSTKANNTVITNSL	30.05	37.83	0	25	29	0
University of Alberta, PcDBP, 20 aa Linear Peptides (PEP20205061690)	4	57	TGLKNVANENLLELKIQNIF	32.62	37.83	0	26	29	0	2	2	1
University of Alberta, PcDBP, 20 aa Linear Peptides (PEP20205061690)	5	57	TGLKNVANENLLELKIQNIF	38.39	37.83	0.56	33	29	4
University of Alberta, PcDBP, 20 aa Linear Peptides (PEP20205061690)	10	52	TKANNTVITNSLNYNHAIES	45.02	37.83	7.18	31	29	2	1	1	1
University of Alberta, PcDBP, 20 aa Linear Peptides (PEP20205061690)	11	52	TKANNTVITNSLNYNHAIES	62.06	37.83	24.23	25	29	0
University of Alberta, PcDBP, 20 aa Linear Peptides (PEP20205061690)	8	60	TLLKSFANFKTDYFSEETCR	28.84	37.83	0	25	29	0	5.5	5.5	1
University of Alberta, PcDBP, 20 aa Linear Peptides (PEP20205061690)	9	60	TLLKSFANFKTDYFSEETCR	47.11	37.83	9.27	40	29	11
University of Alberta, PcDBP, 20 aa Linear Peptides (PEP20205061690)	2	53	TNRLEIIPDKIEIKDNEMKE	26.41	37.83	0	15	29	0	0	0	0
University of Alberta, PcDBP, 20 aa Linear Peptides (PEP20205061690)	3	53	TNRLEIIPDKIEIKDNEMKE	41.89	37.83	4.06	24	29	0
University of Alberta, PcDBP, 20 aa Linear Peptides (PEP20205061690)	6	52	TNYKLEDHHSQIERWAREWI	54.61	37.83	16.77	46	29	17	17	0	0
University of Alberta, PcDBP, 20 aa Linear Peptides (PEP20205061690)	7	52	TNYKLEDHHSQIERWAREWI	47.48	37.83	9.65	46	29	17
University of Alberta, PcDBP, 20 aa Linear Peptides (PEP20205061690)	10	57	TVITNSLNYNHAIESGSGSG	39.94	37.83	2.11	29	29	0	3	3	1
University of Alberta, PcDBP, 20 aa Linear Peptides (PEP20205061690)	11	57	TVITNSLNYNHAIESGSGSG	47.46	37.83	9.63	35	29	6
University of Alberta, PcDBP, 20 aa Linear Peptides (PEP20205061690)	8	49	TWINVNKSKWNTLLKSFANF	45.08	37.83	7.24	33	29	4	6.75	2.75	0.407407
University of Alberta, PcDBP, 20 aa Linear Peptides (PEP20205061690)	9	49	TWINVNKSKWNTLLKSFANF	45.26	37.83	7.43	38.5	29	9.5
University of Alberta, PcDBP, 20 aa Linear Peptides (PEP20205061690)	4	62	VANENLLELKIQNIFGTDDN	29.41	37.83	0	21	29	0	0	0	0
University of Alberta, PcDBP, 20 aa Linear Peptides (PEP20205061690)	5	62	VANENLLELKIQNIFGTDDN	31.95	37.83	0	19	29	0
University of Alberta, PcDBP, 20 aa Linear Peptides (PEP20205061690)	2	35	VCDEKKQNCAPSRRINLCTN	45.65	37.83	7.82	29	29	0	0	0	0
University of Alberta, PcDBP, 20 aa Linear Peptides (PEP20205061690)	3	35	VCDEKKQNCAPSRRINLCTN	70.62	37.83	32.78	29	29	0
University of Alberta, PcDBP, 20 aa Linear Peptides (PEP20205061690)	4	54	VEGTGLKNVANENLLELKIQ	71.92	37.83	34.08	36	29	7	5.5	1.5	0.272727
University of Alberta, PcDBP, 20 aa Linear Peptides (PEP20205061690)	5	54	VEGTGLKNVANENLLELKIQ	41.96	37.83	4.13	33	29	4
University of Alberta, PcDBP, 20 aa Linear Peptides (PEP20205061690)	10	35	VINLDDDHYTGLCICSSTKA	34.08	37.83	0	32	29	3	2.5	0.5	0.2
University of Alberta, PcDBP, 20 aa Linear Peptides (PEP20205061690)	11	35	VINLDDDHYTGLCICSSTKA	40.99	37.83	3.16	31	29	2
University of Alberta, PcDBP, 20 aa Linear Peptides (PEP20205061690)	10	58	VITNSLNYNHAIESGSGSGS	42.15	37.83	4.32	31	29	2	2	0	0
University of Alberta, PcDBP, 20 aa Linear Peptides (PEP20205061690)	11	58	VITNSLNYNHAIESGSGSGS	50.37	37.83	12.54	31	29	2
University of Alberta, PcDBP, 20 aa Linear Peptides (PEP20205061690)	6	36	VLGKDFNEASNYENICTNYK	34.16	37.83	0	27	29	0	4	4	1
University of Alberta, PcDBP, 20 aa Linear Peptides (PEP20205061690)	7	36	VLGKDFNEASNYENICTNYK	49.29	37.83	11.46	37	29	8
University of Alberta, PcDBP, 20 aa Linear Peptides (PEP20205061690)	10	30	VNFENVINLDDDHYTGLCIC	27.83	37.83	0	21	29	0	1	1	1
University of Alberta, PcDBP, 20 aa Linear Peptides (PEP20205061690)	11	30	VNFENVINLDDDHYTGLCIC	38.76	37.83	0.93	31	29	2
University of Alberta, PcDBP, 20 aa Linear Peptides (PEP20205061690)	8	53	VNKSKWNTLLKSFANFKTDY	34.66	37.83	0	25	29	0	0	0	0
University of Alberta, PcDBP, 20 aa Linear Peptides (PEP20205061690)	9	53	VNKSKWNTLLKSFANFKTDY	31.03	37.83	0	23	29	0
University of Alberta, PcDBP, 20 aa Linear Peptides (PEP20205061690)	4	44	VNSFGDYKNIVEGTGLKNVA	44.64	37.83	6.81	32	29	3	1.5	1.5	1
University of Alberta, PcDBP, 20 aa Linear Peptides (PEP20205061690)	5	44	VNSFGDYKNIVEGTGLKNVA	33.45	37.83	0	26	29	0
University of Alberta, PcDBP, 20 aa Linear Peptides (PEP20205061690)	2	9	VNYKEYFDKYQINECKQKEK	62.62	37.83	24.78	48	29	19	23	4	0.173913
University of Alberta, PcDBP, 20 aa Linear Peptides (PEP20205061690)	3	9	VNYKEYFDKYQINECKQKEK	83.76	37.83	45.93	56	29	27
University of Alberta, PcDBP, 20 aa Linear Peptides (PEP20205061690)	8	10	VQYFKEANKINNKCIKKSNI	86.04	37.83	48.21	69	29	40	55.5	15.5	0.279279
University of Alberta, PcDBP, 20 aa Linear Peptides (PEP20205061690)	9	10	VQYFKEANKINNKCIKKSNI	127.05	37.83	89.22	100	29	71
University of Alberta, PcDBP, 20 aa Linear Peptides (PEP20205061690)	6	66	WAREWIQEFSVQYFKEANKI	27.16	37.83	0	20	29	0	2	2	1
University of Alberta, PcDBP, 20 aa Linear Peptides (PEP20205061690)	7	66	WAREWIQEFSVQYFKEANKI	40.16	37.83	2.33	33	29	4
University of Alberta, PcDBP, 20 aa Linear Peptides (PEP20205061690)	8	50	WINVNKSKWNTLLKSFANFK	47.99	37.83	10.16	42	29	13	6.5	6.5	1
University of Alberta, PcDBP, 20 aa Linear Peptides (PEP20205061690)	9	50	WINVNKSKWNTLLKSFANFK	33.92	37.83	0	27	29	0
University of Alberta, PcDBP, 20 aa Linear Peptides (PEP20205061690)	8	4	WIQEFSVQYFKEANKINNKC	34.76	37.83	0	28	29	0	0	0	0
University of Alberta, PcDBP, 20 aa Linear Peptides (PEP20205061690)	9	4	WIQEFSVQYFKEANKINNKC	34.78	37.83	0	22	29	0
University of Alberta, PcDBP, 20 aa Linear Peptides (PEP20205061690)	6	32	WKAMVLGKDFNEASNYENIC	45.32	37.83	7.48	43	29	14	7	7	1
University of Alberta, PcDBP, 20 aa Linear Peptides (PEP20205061690)	7	32	WKAMVLGKDFNEASNYENIC	32.99	37.83	0	29	29	0
University of Alberta, PcDBP, 20 aa Linear Peptides (PEP20205061690)	6	24	WKRHENIIWKAMVLGKDFNE	32	37.83	0	25	29	0	0	0	0
University of Alberta, PcDBP, 20 aa Linear Peptides (PEP20205061690)	7	24	WKRHENIIWKAMVLGKDFNE	30.98	37.83	0	26	29	0
University of Alberta, PcDBP, 20 aa Linear Peptides (PEP20205061690)	8	58	WNTLLKSFANFKTDYFSEET	41.16	37.83	3.33	23	29	0	0.5	0.5	1
University of Alberta, PcDBP, 20 aa Linear Peptides (PEP20205061690)	9	58	WNTLLKSFANFKTDYFSEET	70.55	37.83	32.72	30	29	1
University of Alberta, PcDBP, 20 aa Linear Peptides (PEP20205061690)	2	34	WVCDEKKQNCAPSRRINLCT	39.5	37.83	1.67	35	29	6	4.5	1.5	0.333333
University of Alberta, PcDBP, 20 aa Linear Peptides (PEP20205061690)	3	34	WVCDEKKQNCAPSRRINLCT	35.32	37.83	0	32	29	3
University of Alberta, PcDBP, 20 aa Linear Peptides (PEP20205061690)	6	23	WWKRHENIIWKAMVLGKDFN	53.16	37.83	15.33	26	29	0	1	1	1
University of Alberta, PcDBP, 20 aa Linear Peptides (PEP20205061690)	7	23	WWKRHENIIWKAMVLGKDFN	38.28	37.83	0.44	31	29	2
University of Alberta, PcDBP, 20 aa Linear Peptides (PEP20205061690)	4	39	YCNDMVNSFGDYKNIVEGTG	32.15	37.83	0	21	29	0	1	1	1
University of Alberta, PcDBP, 20 aa Linear Peptides (PEP20205061690)	5	39	YCNDMVNSFGDYKNIVEGTG	34.14	37.83	0	31	29	2
University of Alberta, PcDBP, 20 aa Linear Peptides (PEP20205061690)	4	31	YDDKNNNEYCNDMVNSFGDY	34.78	37.83	0	29	29	0	0	0	0
University of Alberta, PcDBP, 20 aa Linear Peptides (PEP20205061690)	5	31	YDDKNNNEYCNDMVNSFGDY	33.04	37.83	0	27	29	0
University of Alberta, PcDBP, 20 aa Linear Peptides (PEP20205061690)	4	17	YEDAANEGKLLLNKYDDKNN	28.21	37.83	0	23	29	0	1	1	1
University of Alberta, PcDBP, 20 aa Linear Peptides (PEP20205061690)	5	17	YEDAANEGKLLLNKYDDKNN	34.26	37.83	0	31	29	2
University of Alberta, PcDBP, 20 aa Linear Peptides (PEP20205061690)	6	47	YENICTNYKLEDHHSQIERW	44.59	37.83	6.76	42	29	13	12.5	0.5	0.04
University of Alberta, PcDBP, 20 aa Linear Peptides (PEP20205061690)	7	47	YENICTNYKLEDHHSQIERW	74.35	37.83	36.52	41	29	12
University of Alberta, PcDBP, 20 aa Linear Peptides (PEP20205061690)	8	47	YETWINVNKSKWNTLLKSFA	37.29	37.83	0	21	29	0	0	0	0
University of Alberta, PcDBP, 20 aa Linear Peptides (PEP20205061690)	9	47	YETWINVNKSKWNTLLKSFA	34.85	37.83	0	27	29	0
University of Alberta, PcDBP, 20 aa Linear Peptides (PEP20205061690)	10	28	YEVNFENVINLDDDHYTGLC	33.26	37.83	0	31	29	2	5.75	3.75	0.652174
University of Alberta, PcDBP, 20 aa Linear Peptides (PEP20205061690)	11	28	YEVNFENVINLDDDHYTGLC	44.45	37.83	6.62	38.5	29	9.5
University of Alberta, PcDBP, 20 aa Linear Peptides (PEP20205061690)	2	14	YFDKYQINECKQKEKTEIHA	82.94	37.83	45.1	24	29	0	0	0	0
University of Alberta, PcDBP, 20 aa Linear Peptides (PEP20205061690)	3	14	YFDKYQINECKQKEKTEIHA	26.57	37.83	0	21	29	0
University of Alberta, PcDBP, 20 aa Linear Peptides (PEP20205061690)	8	12	YFKEANKINNKCIKKSNIFT	33.16	37.83	0	24	29	0	10.5	10.5	1
University of Alberta, PcDBP, 20 aa Linear Peptides (PEP20205061690)	9	12	YFKEANKINNKCIKKSNIFT	86.33	37.83	48.5	50	29	21
University of Alberta, PcDBP, 20 aa Linear Peptides (PEP20205061690)	4	11	YFKKFIYEDAANEGKLLLNK	29.59	37.83	0	26	29	0	0	0	0
University of Alberta, PcDBP, 20 aa Linear Peptides (PEP20205061690)	5	11	YFKKFIYEDAANEGKLLLNK	25.61	37.83	0	19	29	0
University of Alberta, PcDBP, 20 aa Linear Peptides (PEP20205061690)	10	6	YFSEETCRDKAYNSLMIEFK	31.45	37.83	0	27	29	0	0	0	0
University of Alberta, PcDBP, 20 aa Linear Peptides (PEP20205061690)	11	6	YFSEETCRDKAYNSLMIEFK	29.31	37.83	0	25	29	0
University of Alberta, PcDBP, 20 aa Linear Peptides (PEP20205061690)	2	11	YKEYFDKYQINECKQKEKTE	33.12	37.83	0	29	29	0	0	0	0
University of Alberta, PcDBP, 20 aa Linear Peptides (PEP20205061690)	3	11	YKEYFDKYQINECKQKEKTE	28.05	37.83	0	21	29	0
University of Alberta, PcDBP, 20 aa Linear Peptides (PEP20205061690)	6	54	YKLEDHHSQIERWAREWIQE	39.11	37.83	1.28	36	29	7	6	1	0.166667
University of Alberta, PcDBP, 20 aa Linear Peptides (PEP20205061690)	7	54	YKLEDHHSQIERWAREWIQE	42.4	37.83	4.57	34	29	5
University of Alberta, PcDBP, 20 aa Linear Peptides (PEP20205061690)	4	50	YKNIVEGTGLKNVANENLLE	32.92	37.83	0	25	29	0	2.5	2.5	1
University of Alberta, PcDBP, 20 aa Linear Peptides (PEP20205061690)	5	50	YKNIVEGTGLKNVANENLLE	71.09	37.83	33.26	34	29	5
University of Alberta, PcDBP, 20 aa Linear Peptides (PEP20205061690)	10	17	YNSLMIEFKEAYEVNFENVI	27.85	37.83	0	25	29	0	0	0	0
University of Alberta, PcDBP, 20 aa Linear Peptides (PEP20205061690)	11	17	YNSLMIEFKEAYEVNFENVI	38.08	37.83	0.24	28	29	0
University of Alberta, PcDBP, 20 aa Linear Peptides (PEP20205061690)	2	18	YQINECKQKEKTEIHAWVCD	33.06	37.83	0	31	29	2	1	1	1
University of Alberta, PcDBP, 20 aa Linear Peptides (PEP20205061690)	3	18	YQINECKQKEKTEIHAWVCD	31.46	37.83	0	25	29	0
University of Alberta, PcDBP, 20 aa Linear Peptides (PEP20205061690)	10	43	YTGLCICSSTKANNTVITNS	80.17	37.83	42.34	37	29	8	5.5	2.5	0.454545
University of Alberta, PcDBP, 20 aa Linear Peptides (PEP20205061690)	11	43	YTGLCICSSTKANNTVITNS	40.54	37.83	2.7	32	29	3

## Sheet: Calculation
Calculation PcDBP (PEP20205061690) - Mouse IgG1 Monoclonal Antibody 3D10
The calculation is based on the corrected intensity values. For a better data overview, the baselines of the intensity plot are leveled.
Spot Family	Row	Column	Peptide	Mouse mAb 3D10, 10 µg/ml
University of Alberta, PcDBP, 20 aa Linear Peptides (PEP20205061690)	2	2	GSGSGSGVNYKEYFDKYQIN	425
University of Alberta, PcDBP, 20 aa Linear Peptides (PEP20205061690)	2	3	SGSGSGVNYKEYFDKYQINE	415
University of Alberta, PcDBP, 20 aa Linear Peptides (PEP20205061690)	2	4	GSGSGVNYKEYFDKYQINEC	405
University of Alberta, PcDBP, 20 aa Linear Peptides (PEP20205061690)	2	5	SGSGVNYKEYFDKYQINECK	412.5
University of Alberta, PcDBP, 20 aa Linear Peptides (PEP20205061690)	2	6	GSGVNYKEYFDKYQINECKQ	400
University of Alberta, PcDBP, 20 aa Linear Peptides (PEP20205061690)	2	7	SGVNYKEYFDKYQINECKQK	424.5
University of Alberta, PcDBP, 20 aa Linear Peptides (PEP20205061690)	2	8	GVNYKEYFDKYQINECKQKE	407.75
University of Alberta, PcDBP, 20 aa Linear Peptides (PEP20205061690)	2	9	VNYKEYFDKYQINECKQKEK	423
University of Alberta, PcDBP, 20 aa Linear Peptides (PEP20205061690)	2	10	NYKEYFDKYQINECKQKEKT	424
University of Alberta, PcDBP, 20 aa Linear Peptides (PEP20205061690)	2	11	YKEYFDKYQINECKQKEKTE	400
University of Alberta, PcDBP, 20 aa Linear Peptides (PEP20205061690)	2	12	KEYFDKYQINECKQKEKTEI	400
University of Alberta, PcDBP, 20 aa Linear Peptides (PEP20205061690)	2	13	EYFDKYQINECKQKEKTEIH	400
University of Alberta, PcDBP, 20 aa Linear Peptides (PEP20205061690)	2	14	YFDKYQINECKQKEKTEIHA	400
University of Alberta, PcDBP, 20 aa Linear Peptides (PEP20205061690)	2	15	FDKYQINECKQKEKTEIHAW	400
University of Alberta, PcDBP, 20 aa Linear Peptides (PEP20205061690)	2	16	DKYQINECKQKEKTEIHAWV	400
University of Alberta, PcDBP, 20 aa Linear Peptides (PEP20205061690)	2	17	KYQINECKQKEKTEIHAWVC	400
University of Alberta, PcDBP, 20 aa Linear Peptides (PEP20205061690)	2	18	YQINECKQKEKTEIHAWVCD	400
University of Alberta, PcDBP, 20 aa Linear Peptides (PEP20205061690)	2	19	QINECKQKEKTEIHAWVCDE	400
University of Alberta, PcDBP, 20 aa Linear Peptides (PEP20205061690)	2	20	INECKQKEKTEIHAWVCDEK	400
University of Alberta, PcDBP, 20 aa Linear Peptides (PEP20205061690)	2	21	NECKQKEKTEIHAWVCDEKK	400
University of Alberta, PcDBP, 20 aa Linear Peptides (PEP20205061690)	2	22	ECKQKEKTEIHAWVCDEKKQ	400
University of Alberta, PcDBP, 20 aa Linear Peptides (PEP20205061690)	2	23	CKQKEKTEIHAWVCDEKKQN	400
University of Alberta, PcDBP, 20 aa Linear Peptides (PEP20205061690)	2	24	KQKEKTEIHAWVCDEKKQNC	400
University of Alberta, PcDBP, 20 aa Linear Peptides (PEP20205061690)	2	25	QKEKTEIHAWVCDEKKQNCA	400
University of Alberta, PcDBP, 20 aa Linear Peptides (PEP20205061690)	2	26	KEKTEIHAWVCDEKKQNCAP	400
University of Alberta, PcDBP, 20 aa Linear Peptides (PEP20205061690)	2	27	EKTEIHAWVCDEKKQNCAPS	400
University of Alberta, PcDBP, 20 aa Linear Peptides (PEP20205061690)	2	28	KTEIHAWVCDEKKQNCAPSR	400
University of Alberta, PcDBP, 20 aa Linear Peptides (PEP20205061690)	2	29	TEIHAWVCDEKKQNCAPSRR	400
University of Alberta, PcDBP, 20 aa Linear Peptides (PEP20205061690)	2	30	EIHAWVCDEKKQNCAPSRRI	400
University of Alberta, PcDBP, 20 aa Linear Peptides (PEP20205061690)	2	31	IHAWVCDEKKQNCAPSRRIN	400
University of Alberta, PcDBP, 20 aa Linear Peptides (PEP20205061690)	2	32	HAWVCDEKKQNCAPSRRINL	400
University of Alberta, PcDBP, 20 aa Linear Peptides (PEP20205061690)	2	33	AWVCDEKKQNCAPSRRINLC	400
University of Alberta, PcDBP, 20 aa Linear Peptides (PEP20205061690)	2	34	WVCDEKKQNCAPSRRINLCT	404.5
University of Alberta, PcDBP, 20 aa Linear Peptides (PEP20205061690)	2	35	VCDEKKQNCAPSRRINLCTN	400
University of Alberta, PcDBP, 20 aa Linear Peptides (PEP20205061690)	2	36	CDEKKQNCAPSRRINLCTNR	400
University of Alberta, PcDBP, 20 aa Linear Peptides (PEP20205061690)	2	37	DEKKQNCAPSRRINLCTNRL	407
University of Alberta, PcDBP, 20 aa Linear Peptides (PEP20205061690)	2	38	EKKQNCAPSRRINLCTNRLE	404
University of Alberta, PcDBP, 20 aa Linear Peptides (PEP20205061690)	2	39	KKQNCAPSRRINLCTNRLEI	400
University of Alberta, PcDBP, 20 aa Linear Peptides (PEP20205061690)	2	40	KQNCAPSRRINLCTNRLEII	400
University of Alberta, PcDBP, 20 aa Linear Peptides (PEP20205061690)	2	41	QNCAPSRRINLCTNRLEIIP	407.5
University of Alberta, PcDBP, 20 aa Linear Peptides (PEP20205061690)	2	42	NCAPSRRINLCTNRLEIIPD	400
University of Alberta, PcDBP, 20 aa Linear Peptides (PEP20205061690)	2	43	CAPSRRINLCTNRLEIIPDK	400
University of Alberta, PcDBP, 20 aa Linear Peptides (PEP20205061690)	2	44	APSRRINLCTNRLEIIPDKI	400
University of Alberta, PcDBP, 20 aa Linear Peptides (PEP20205061690)	2	45	PSRRINLCTNRLEIIPDKIE	402
University of Alberta, PcDBP, 20 aa Linear Peptides (PEP20205061690)	2	46	SRRINLCTNRLEIIPDKIEI	400
University of Alberta, PcDBP, 20 aa Linear Peptides (PEP20205061690)	2	47	RRINLCTNRLEIIPDKIEIK	407
University of Alberta, PcDBP, 20 aa Linear Peptides (PEP20205061690)	2	48	RINLCTNRLEIIPDKIEIKD	400
University of Alberta, PcDBP, 20 aa Linear Peptides (PEP20205061690)	2	49	INLCTNRLEIIPDKIEIKDN	400
University of Alberta, PcDBP, 20 aa Linear Peptides (PEP20205061690)	2	50	NLCTNRLEIIPDKIEIKDNE	400
University of Alberta, PcDBP, 20 aa Linear Peptides (PEP20205061690)	2	51	LCTNRLEIIPDKIEIKDNEM	400
University of Alberta, PcDBP, 20 aa Linear Peptides (PEP20205061690)	2	52	CTNRLEIIPDKIEIKDNEMK	400
University of Alberta, PcDBP, 20 aa Linear Peptides (PEP20205061690)	2	53	TNRLEIIPDKIEIKDNEMKE	400
University of Alberta, PcDBP, 20 aa Linear Peptides (PEP20205061690)	2	54	NRLEIIPDKIEIKDNEMKEL	400
University of Alberta, PcDBP, 20 aa Linear Peptides (PEP20205061690)	2	55	RLEIIPDKIEIKDNEMKELL	400
University of Alberta, PcDBP, 20 aa Linear Peptides (PEP20205061690)	2	56	LEIIPDKIEIKDNEMKELLM	400
University of Alberta, PcDBP, 20 aa Linear Peptides (PEP20205061690)	2	57	EIIPDKIEIKDNEMKELLMD	400
University of Alberta, PcDBP, 20 aa Linear Peptides (PEP20205061690)	2	58	IIPDKIEIKDNEMKELLMDY	400
University of Alberta, PcDBP, 20 aa Linear Peptides (PEP20205061690)	2	59	IPDKIEIKDNEMKELLMDYF	400
University of Alberta, PcDBP, 20 aa Linear Peptides (PEP20205061690)	2	60	PDKIEIKDNEMKELLMDYFK	400
University of Alberta, PcDBP, 20 aa Linear Peptides (PEP20205061690)	2	61	DKIEIKDNEMKELLMDYFKK	400
University of Alberta, PcDBP, 20 aa Linear Peptides (PEP20205061690)	2	62	KIEIKDNEMKELLMDYFKKF	400
University of Alberta, PcDBP, 20 aa Linear Peptides (PEP20205061690)	2	63	IEIKDNEMKELLMDYFKKFI	400
University of Alberta, PcDBP, 20 aa Linear Peptides (PEP20205061690)	2	64	EIKDNEMKELLMDYFKKFIY	400
University of Alberta, PcDBP, 20 aa Linear Peptides (PEP20205061690)	2	65	IKDNEMKELLMDYFKKFIYE	400
University of Alberta, PcDBP, 20 aa Linear Peptides (PEP20205061690)	2	66	KDNEMKELLMDYFKKFIYED	400
University of Alberta, PcDBP, 20 aa Linear Peptides (PEP20205061690)	2	67	DNEMKELLMDYFKKFIYEDA	400
University of Alberta, PcDBP, 20 aa Linear Peptides (PEP20205061690)	4	2	NEMKELLMDYFKKFIYEDAA	400
University of Alberta, PcDBP, 20 aa Linear Peptides (PEP20205061690)	4	3	EMKELLMDYFKKFIYEDAAN	403
University of Alberta, PcDBP, 20 aa Linear Peptides (PEP20205061690)	4	4	MKELLMDYFKKFIYEDAANE	400
University of Alberta, PcDBP, 20 aa Linear Peptides (PEP20205061690)	4	5	KELLMDYFKKFIYEDAANEG	400
University of Alberta, PcDBP, 20 aa Linear Peptides (PEP20205061690)	4	6	ELLMDYFKKFIYEDAANEGK	400
University of Alberta, PcDBP, 20 aa Linear Peptides (PEP20205061690)	4	7	LLMDYFKKFIYEDAANEGKL	400
University of Alberta, PcDBP, 20 aa Linear Peptides (PEP20205061690)	4	8	LMDYFKKFIYEDAANEGKLL	400
University of Alberta, PcDBP, 20 aa Linear Peptides (PEP20205061690)	4	9	MDYFKKFIYEDAANEGKLLL	400
University of Alberta, PcDBP, 20 aa Linear Peptides (PEP20205061690)	4	10	DYFKKFIYEDAANEGKLLLN	400
University of Alberta, PcDBP, 20 aa Linear Peptides (PEP20205061690)	4	11	YFKKFIYEDAANEGKLLLNK	400
University of Alberta, PcDBP, 20 aa Linear Peptides (PEP20205061690)	4	12	FKKFIYEDAANEGKLLLNKY	400
University of Alberta, PcDBP, 20 aa Linear Peptides (PEP20205061690)	4	13	KKFIYEDAANEGKLLLNKYD	400
University of Alberta, PcDBP, 20 aa Linear Peptides (PEP20205061690)	4	14	KFIYEDAANEGKLLLNKYDD	400
University of Alberta, PcDBP, 20 aa Linear Peptides (PEP20205061690)	4	15	FIYEDAANEGKLLLNKYDDK	420
University of Alberta, PcDBP, 20 aa Linear Peptides (PEP20205061690)	4	16	IYEDAANEGKLLLNKYDDKN	409.5
University of Alberta, PcDBP, 20 aa Linear Peptides (PEP20205061690)	4	17	YEDAANEGKLLLNKYDDKNN	400
University of Alberta, PcDBP, 20 aa Linear Peptides (PEP20205061690)	4	18	EDAANEGKLLLNKYDDKNNN	400
University of Alberta, PcDBP, 20 aa Linear Peptides (PEP20205061690)	4	19	DAANEGKLLLNKYDDKNNNE	400
University of Alberta, PcDBP, 20 aa Linear Peptides (PEP20205061690)	4	20	AANEGKLLLNKYDDKNNNEY	400
University of Alberta, PcDBP, 20 aa Linear Peptides (PEP20205061690)	4	21	ANEGKLLLNKYDDKNNNEYC	400
University of Alberta, PcDBP, 20 aa Linear Peptides (PEP20205061690)	4	22	NEGKLLLNKYDDKNNNEYCN	400
University of Alberta, PcDBP, 20 aa Linear Peptides (PEP20205061690)	4	23	EGKLLLNKYDDKNNNEYCND	400
University of Alberta, PcDBP, 20 aa Linear Peptides (PEP20205061690)	4	24	GKLLLNKYDDKNNNEYCNDM	400
University of Alberta, PcDBP, 20 aa Linear Peptides (PEP20205061690)	4	25	KLLLNKYDDKNNNEYCNDMV	400
University of Alberta, PcDBP, 20 aa Linear Peptides (PEP20205061690)	4	26	LLLNKYDDKNNNEYCNDMVN	400
University of Alberta, PcDBP, 20 aa Linear Peptides (PEP20205061690)	4	27	LLNKYDDKNNNEYCNDMVNS	400
University of Alberta, PcDBP, 20 aa Linear Peptides (PEP20205061690)	4	28	LNKYDDKNNNEYCNDMVNSF	400
University of Alberta, PcDBP, 20 aa Linear Peptides (PEP20205061690)	4	29	NKYDDKNNNEYCNDMVNSFG	405.5
University of Alberta, PcDBP, 20 aa Linear Peptides (PEP20205061690)	4	30	KYDDKNNNEYCNDMVNSFGD	400
University of Alberta, PcDBP, 20 aa Linear Peptides (PEP20205061690)	4	31	YDDKNNNEYCNDMVNSFGDY	400
University of Alberta, PcDBP, 20 aa Linear Peptides (PEP20205061690)	4	32	DDKNNNEYCNDMVNSFGDYK	400
University of Alberta, PcDBP, 20 aa Linear Peptides (PEP20205061690)	4	33	DKNNNEYCNDMVNSFGDYKN	400
University of Alberta, PcDBP, 20 aa Linear Peptides (PEP20205061690)	4	34	KNNNEYCNDMVNSFGDYKNI	406
University of Alberta, PcDBP, 20 aa Linear Peptides (PEP20205061690)	4	35	NNNEYCNDMVNSFGDYKNIV	400
University of Alberta, PcDBP, 20 aa Linear Peptides (PEP20205061690)	4	36	NNEYCNDMVNSFGDYKNIVE	400
University of Alberta, PcDBP, 20 aa Linear Peptides (PEP20205061690)	4	37	NEYCNDMVNSFGDYKNIVEG	400
University of Alberta, PcDBP, 20 aa Linear Peptides (PEP20205061690)	4	38	EYCNDMVNSFGDYKNIVEGT	400
University of Alberta, PcDBP, 20 aa Linear Peptides (PEP20205061690)	4	39	YCNDMVNSFGDYKNIVEGTG	400
University of Alberta, PcDBP, 20 aa Linear Peptides (PEP20205061690)	4	40	CNDMVNSFGDYKNIVEGTGL	400
University of Alberta, PcDBP, 20 aa Linear Peptides (PEP20205061690)	4	41	NDMVNSFGDYKNIVEGTGLK	414
University of Alberta, PcDBP, 20 aa Linear Peptides (PEP20205061690)	4	42	DMVNSFGDYKNIVEGTGLKN	405
University of Alberta, PcDBP, 20 aa Linear Peptides (PEP20205061690)	4	43	MVNSFGDYKNIVEGTGLKNV	400
University of Alberta, PcDBP, 20 aa Linear Peptides (PEP20205061690)	4	44	VNSFGDYKNIVEGTGLKNVA	400
University of Alberta, PcDBP, 20 aa Linear Peptides (PEP20205061690)	4	45	NSFGDYKNIVEGTGLKNVAN	402
University of Alberta, PcDBP, 20 aa Linear Peptides (PEP20205061690)	4	46	SFGDYKNIVEGTGLKNVANE	400
University of Alberta, PcDBP, 20 aa Linear Peptides (PEP20205061690)	4	47	FGDYKNIVEGTGLKNVANEN	400
University of Alberta, PcDBP, 20 aa Linear Peptides (PEP20205061690)	4	48	GDYKNIVEGTGLKNVANENL	400
University of Alberta, PcDBP, 20 aa Linear Peptides (PEP20205061690)	4	49	DYKNIVEGTGLKNVANENLL	400
University of Alberta, PcDBP, 20 aa Linear Peptides (PEP20205061690)	4	50	YKNIVEGTGLKNVANENLLE	400
University of Alberta, PcDBP, 20 aa Linear Peptides (PEP20205061690)	4	51	KNIVEGTGLKNVANENLLEL	400
University of Alberta, PcDBP, 20 aa Linear Peptides (PEP20205061690)	4	52	NIVEGTGLKNVANENLLELK	400
University of Alberta, PcDBP, 20 aa Linear Peptides (PEP20205061690)	4	53	IVEGTGLKNVANENLLELKI	400
University of Alberta, PcDBP, 20 aa Linear Peptides (PEP20205061690)	4	54	VEGTGLKNVANENLLELKIQ	405.5
University of Alberta, PcDBP, 20 aa Linear Peptides (PEP20205061690)	4	55	EGTGLKNVANENLLELKIQN	400
University of Alberta, PcDBP, 20 aa Linear Peptides (PEP20205061690)	4	56	GTGLKNVANENLLELKIQNI	400
University of Alberta, PcDBP, 20 aa Linear Peptides (PEP20205061690)	4	57	TGLKNVANENLLELKIQNIF	400
University of Alberta, PcDBP, 20 aa Linear Peptides (PEP20205061690)	4	58	GLKNVANENLLELKIQNIFG	400
University of Alberta, PcDBP, 20 aa Linear Peptides (PEP20205061690)	4	59	LKNVANENLLELKIQNIFGT	400
University of Alberta, PcDBP, 20 aa Linear Peptides (PEP20205061690)	4	60	KNVANENLLELKIQNIFGTD	400
University of Alberta, PcDBP, 20 aa Linear Peptides (PEP20205061690)	4	61	NVANENLLELKIQNIFGTDD	400
University of Alberta, PcDBP, 20 aa Linear Peptides (PEP20205061690)	4	62	VANENLLELKIQNIFGTDDN	400
University of Alberta, PcDBP, 20 aa Linear Peptides (PEP20205061690)	4	63	ANENLLELKIQNIFGTDDNA	400
University of Alberta, PcDBP, 20 aa Linear Peptides (PEP20205061690)	4	64	NENLLELKIQNIFGTDDNAK	400
University of Alberta, PcDBP, 20 aa Linear Peptides (PEP20205061690)	4	65	ENLLELKIQNIFGTDDNAKR	400
University of Alberta, PcDBP, 20 aa Linear Peptides (PEP20205061690)	4	66	NLLELKIQNIFGTDDNAKRD	400
University of Alberta, PcDBP, 20 aa Linear Peptides (PEP20205061690)	4	67	LLELKIQNIFGTDDNAKRDR	400
University of Alberta, PcDBP, 20 aa Linear Peptides (PEP20205061690)	6	2	LELKIQNIFGTDDNAKRDRK	433.5
University of Alberta, PcDBP, 20 aa Linear Peptides (PEP20205061690)	6	3	ELKIQNIFGTDDNAKRDRKI	779.5
University of Alberta, PcDBP, 20 aa Linear Peptides (PEP20205061690)	6	4	LKIQNIFGTDDNAKRDRKIW	436
University of Alberta, PcDBP, 20 aa Linear Peptides (PEP20205061690)	6	5	KIQNIFGTDDNAKRDRKIWW	416.5
University of Alberta, PcDBP, 20 aa Linear Peptides (PEP20205061690)	6	6	IQNIFGTDDNAKRDRKIWWK	420.5
University of Alberta, PcDBP, 20 aa Linear Peptides (PEP20205061690)	6	7	QNIFGTDDNAKRDRKIWWKR	414
University of Alberta, PcDBP, 20 aa Linear Peptides (PEP20205061690)	6	8	NIFGTDDNAKRDRKIWWKRH	400
University of Alberta, PcDBP, 20 aa Linear Peptides (PEP20205061690)	6	9	IFGTDDNAKRDRKIWWKRHE	400
University of Alberta, PcDBP, 20 aa Linear Peptides (PEP20205061690)	6	10	FGTDDNAKRDRKIWWKRHEN	400
University of Alberta, PcDBP, 20 aa Linear Peptides (PEP20205061690)	6	11	GTDDNAKRDRKIWWKRHENI	400
University of Alberta, PcDBP, 20 aa Linear Peptides (PEP20205061690)	6	12	TDDNAKRDRKIWWKRHENII	400
University of Alberta, PcDBP, 20 aa Linear Peptides (PEP20205061690)	6	13	DDNAKRDRKIWWKRHENIIW	400
University of Alberta, PcDBP, 20 aa Linear Peptides (PEP20205061690)	6	14	DNAKRDRKIWWKRHENIIWK	400
University of Alberta, PcDBP, 20 aa Linear Peptides (PEP20205061690)	6	15	NAKRDRKIWWKRHENIIWKA	400
University of Alberta, PcDBP, 20 aa Linear Peptides (PEP20205061690)	6	16	AKRDRKIWWKRHENIIWKAM	400
University of Alberta, PcDBP, 20 aa Linear Peptides (PEP20205061690)	6	17	KRDRKIWWKRHENIIWKAMV	400
University of Alberta, PcDBP, 20 aa Linear Peptides (PEP20205061690)	6	18	RDRKIWWKRHENIIWKAMVL	400
University of Alberta, PcDBP, 20 aa Linear Peptides (PEP20205061690)	6	19	DRKIWWKRHENIIWKAMVLG	400
University of Alberta, PcDBP, 20 aa Linear Peptides (PEP20205061690)	6	20	RKIWWKRHENIIWKAMVLGK	400
University of Alberta, PcDBP, 20 aa Linear Peptides (PEP20205061690)	6	21	KIWWKRHENIIWKAMVLGKD	400
University of Alberta, PcDBP, 20 aa Linear Peptides (PEP20205061690)	6	22	IWWKRHENIIWKAMVLGKDF	406
University of Alberta, PcDBP, 20 aa Linear Peptides (PEP20205061690)	6	23	WWKRHENIIWKAMVLGKDFN	400
University of Alberta, PcDBP, 20 aa Linear Peptides (PEP20205061690)	6	24	WKRHENIIWKAMVLGKDFNE	400
University of Alberta, PcDBP, 20 aa Linear Peptides (PEP20205061690)	6	25	KRHENIIWKAMVLGKDFNEA	400
University of Alberta, PcDBP, 20 aa Linear Peptides (PEP20205061690)	6	26	RHENIIWKAMVLGKDFNEAS	400
University of Alberta, PcDBP, 20 aa Linear Peptides (PEP20205061690)	6	27	HENIIWKAMVLGKDFNEASN	400
University of Alberta, PcDBP, 20 aa Linear Peptides (PEP20205061690)	6	28	ENIIWKAMVLGKDFNEASNY	400
University of Alberta, PcDBP, 20 aa Linear Peptides (PEP20205061690)	6	29	NIIWKAMVLGKDFNEASNYE	400
University of Alberta, PcDBP, 20 aa Linear Peptides (PEP20205061690)	6	30	IIWKAMVLGKDFNEASNYEN	400
University of Alberta, PcDBP, 20 aa Linear Peptides (PEP20205061690)	6	31	IWKAMVLGKDFNEASNYENI	400
University of Alberta, PcDBP, 20 aa Linear Peptides (PEP20205061690)	6	32	WKAMVLGKDFNEASNYENIC	400
University of Alberta, PcDBP, 20 aa Linear Peptides (PEP20205061690)	6	33	KAMVLGKDFNEASNYENICT	408.75
University of Alberta, PcDBP, 20 aa Linear Peptides (PEP20205061690)	6	34	AMVLGKDFNEASNYENICTN	408.5
University of Alberta, PcDBP, 20 aa Linear Peptides (PEP20205061690)	6	35	MVLGKDFNEASNYENICTNY	400
University of Alberta, PcDBP, 20 aa Linear Peptides (PEP20205061690)	6	36	VLGKDFNEASNYENICTNYK	400
University of Alberta, PcDBP, 20 aa Linear Peptides (PEP20205061690)	6	37	LGKDFNEASNYENICTNYKL	418
University of Alberta, PcDBP, 20 aa Linear Peptides (PEP20205061690)	6	38	GKDFNEASNYENICTNYKLE	400
University of Alberta, PcDBP, 20 aa Linear Peptides (PEP20205061690)	6	39	KDFNEASNYENICTNYKLED	400
University of Alberta, PcDBP, 20 aa Linear Peptides (PEP20205061690)	6	40	DFNEASNYENICTNYKLEDH	402
University of Alberta, PcDBP, 20 aa Linear Peptides (PEP20205061690)	6	41	FNEASNYENICTNYKLEDHH	400
University of Alberta, PcDBP, 20 aa Linear Peptides (PEP20205061690)	6	42	NEASNYENICTNYKLEDHHS	400
University of Alberta, PcDBP, 20 aa Linear Peptides (PEP20205061690)	6	43	EASNYENICTNYKLEDHHSQ	400
University of Alberta, PcDBP, 20 aa Linear Peptides (PEP20205061690)	6	44	ASNYENICTNYKLEDHHSQI	400
University of Alberta, PcDBP, 20 aa Linear Peptides (PEP20205061690)	6	45	SNYENICTNYKLEDHHSQIE	400
University of Alberta, PcDBP, 20 aa Linear Peptides (PEP20205061690)	6	46	NYENICTNYKLEDHHSQIER	413
University of Alberta, PcDBP, 20 aa Linear Peptides (PEP20205061690)	6	47	YENICTNYKLEDHHSQIERW	412.5
University of Alberta, PcDBP, 20 aa Linear Peptides (PEP20205061690)	6	48	ENICTNYKLEDHHSQIERWA	400
University of Alberta, PcDBP, 20 aa Linear Peptides (PEP20205061690)	6	49	NICTNYKLEDHHSQIERWAR	400
University of Alberta, PcDBP, 20 aa Linear Peptides (PEP20205061690)	6	50	ICTNYKLEDHHSQIERWARE	411.5
University of Alberta, PcDBP, 20 aa Linear Peptides (PEP20205061690)	6	51	CTNYKLEDHHSQIERWAREW	413.5
University of Alberta, PcDBP, 20 aa Linear Peptides (PEP20205061690)	6	52	TNYKLEDHHSQIERWAREWI	417
University of Alberta, PcDBP, 20 aa Linear Peptides (PEP20205061690)	6	53	NYKLEDHHSQIERWAREWIQ	409.5
University of Alberta, PcDBP, 20 aa Linear Peptides (PEP20205061690)	6	54	YKLEDHHSQIERWAREWIQE	406
University of Alberta, PcDBP, 20 aa Linear Peptides (PEP20205061690)	6	55	KLEDHHSQIERWAREWIQEF	406.5
University of Alberta, PcDBP, 20 aa Linear Peptides (PEP20205061690)	6	56	LEDHHSQIERWAREWIQEFS	400
University of Alberta, PcDBP, 20 aa Linear Peptides (PEP20205061690)	6	57	EDHHSQIERWAREWIQEFSV	400
University of Alberta, PcDBP, 20 aa Linear Peptides (PEP20205061690)	6	58	DHHSQIERWAREWIQEFSVQ	400
University of Alberta, PcDBP, 20 aa Linear Peptides (PEP20205061690)	6	59	HHSQIERWAREWIQEFSVQY	400
University of Alberta, PcDBP, 20 aa Linear Peptides (PEP20205061690)	6	60	HSQIERWAREWIQEFSVQYF	400
University of Alberta, PcDBP, 20 aa Linear Peptides (PEP20205061690)	6	61	SQIERWAREWIQEFSVQYFK	400
University of Alberta, PcDBP, 20 aa Linear Peptides (PEP20205061690)	6	62	QIERWAREWIQEFSVQYFKE	400
University of Alberta, PcDBP, 20 aa Linear Peptides (PEP20205061690)	6	63	IERWAREWIQEFSVQYFKEA	400
University of Alberta, PcDBP, 20 aa Linear Peptides (PEP20205061690)	6	64	ERWAREWIQEFSVQYFKEAN	400
University of Alberta, PcDBP, 20 aa Linear Peptides (PEP20205061690)	6	65	RWAREWIQEFSVQYFKEANK	400
University of Alberta, PcDBP, 20 aa Linear Peptides (PEP20205061690)	6	66	WAREWIQEFSVQYFKEANKI	400
University of Alberta, PcDBP, 20 aa Linear Peptides (PEP20205061690)	6	67	AREWIQEFSVQYFKEANKIN	400
University of Alberta, PcDBP, 20 aa Linear Peptides (PEP20205061690)	8	2	REWIQEFSVQYFKEANKINN	400
University of Alberta, PcDBP, 20 aa Linear Peptides (PEP20205061690)	8	3	EWIQEFSVQYFKEANKINNK	400
University of Alberta, PcDBP, 20 aa Linear Peptides (PEP20205061690)	8	4	WIQEFSVQYFKEANKINNKC	400
University of Alberta, PcDBP, 20 aa Linear Peptides (PEP20205061690)	8	5	IQEFSVQYFKEANKINNKCI	400
University of Alberta, PcDBP, 20 aa Linear Peptides (PEP20205061690)	8	6	QEFSVQYFKEANKINNKCIK	400
University of Alberta, PcDBP, 20 aa Linear Peptides (PEP20205061690)	8	7	EFSVQYFKEANKINNKCIKK	489.75
University of Alberta, PcDBP, 20 aa Linear Peptides (PEP20205061690)	8	8	FSVQYFKEANKINNKCIKKS	604.5
University of Alberta, PcDBP, 20 aa Linear Peptides (PEP20205061690)	8	9	SVQYFKEANKINNKCIKKSN	479.5
University of Alberta, PcDBP, 20 aa Linear Peptides (PEP20205061690)	8	10	VQYFKEANKINNKCIKKSNI	455.5
University of Alberta, PcDBP, 20 aa Linear Peptides (PEP20205061690)	8	11	QYFKEANKINNKCIKKSNIF	400
University of Alberta, PcDBP, 20 aa Linear Peptides (PEP20205061690)	8	12	YFKEANKINNKCIKKSNIFT	400
University of Alberta, PcDBP, 20 aa Linear Peptides (PEP20205061690)	8	13	FKEANKINNKCIKKSNIFTE	400
University of Alberta, PcDBP, 20 aa Linear Peptides (PEP20205061690)	8	14	KEANKINNKCIKKSNIFTES	400
University of Alberta, PcDBP, 20 aa Linear Peptides (PEP20205061690)	8	15	EANKINNKCIKKSNIFTESI	400
University of Alberta, PcDBP, 20 aa Linear Peptides (PEP20205061690)	8	16	ANKINNKCIKKSNIFTESIC	400
University of Alberta, PcDBP, 20 aa Linear Peptides (PEP20205061690)	8	17	NKINNKCIKKSNIFTESICT	400
University of Alberta, PcDBP, 20 aa Linear Peptides (PEP20205061690)	8	18	KINNKCIKKSNIFTESICTD	400
University of Alberta, PcDBP, 20 aa Linear Peptides (PEP20205061690)	8	19	INNKCIKKSNIFTESICTDN	400
University of Alberta, PcDBP, 20 aa Linear Peptides (PEP20205061690)	8	20	NNKCIKKSNIFTESICTDNN	400
University of Alberta, PcDBP, 20 aa Linear Peptides (PEP20205061690)	8	21	NKCIKKSNIFTESICTDNNC	400
University of Alberta, PcDBP, 20 aa Linear Peptides (PEP20205061690)	8	22	KCIKKSNIFTESICTDNNCK	400
University of Alberta, PcDBP, 20 aa Linear Peptides (PEP20205061690)	8	23	CIKKSNIFTESICTDNNCKT	402
University of Alberta, PcDBP, 20 aa Linear Peptides (PEP20205061690)	8	24	IKKSNIFTESICTDNNCKTA	400
University of Alberta, PcDBP, 20 aa Linear Peptides (PEP20205061690)	8	25	KKSNIFTESICTDNNCKTAC	400
University of Alberta, PcDBP, 20 aa Linear Peptides (PEP20205061690)	8	26	KSNIFTESICTDNNCKTACN	400
University of Alberta, PcDBP, 20 aa Linear Peptides (PEP20205061690)	8	27	SNIFTESICTDNNCKTACNA	400
University of Alberta, PcDBP, 20 aa Linear Peptides (PEP20205061690)	8	28	NIFTESICTDNNCKTACNAY	400
University of Alberta, PcDBP, 20 aa Linear Peptides (PEP20205061690)	8	29	IFTESICTDNNCKTACNAYE	400
University of Alberta, PcDBP, 20 aa Linear Peptides (PEP20205061690)	8	30	FTESICTDNNCKTACNAYET	400
University of Alberta, PcDBP, 20 aa Linear Peptides (PEP20205061690)	8	31	TESICTDNNCKTACNAYETW	400
University of Alberta, PcDBP, 20 aa Linear Peptides (PEP20205061690)	8	32	ESICTDNNCKTACNAYETWI	407
University of Alberta, PcDBP, 20 aa Linear Peptides (PEP20205061690)	8	33	SICTDNNCKTACNAYETWIN	400
University of Alberta, PcDBP, 20 aa Linear Peptides (PEP20205061690)	8	34	ICTDNNCKTACNAYETWINV	400
University of Alberta, PcDBP, 20 aa Linear Peptides (PEP20205061690)	8	35	CTDNNCKTACNAYETWINVN	400
University of Alberta, PcDBP, 20 aa Linear Peptides (PEP20205061690)	8	36	TDNNCKTACNAYETWINVNK	400
University of Alberta, PcDBP, 20 aa Linear Peptides (PEP20205061690)	8	37	DNNCKTACNAYETWINVNKS	400
University of Alberta, PcDBP, 20 aa Linear Peptides (PEP20205061690)	8	38	NNCKTACNAYETWINVNKSK	408.5
University of Alberta, PcDBP, 20 aa Linear Peptides (PEP20205061690)	8	39	NCKTACNAYETWINVNKSKW	400
University of Alberta, PcDBP, 20 aa Linear Peptides (PEP20205061690)	8	40	CKTACNAYETWINVNKSKWN	404.5
University of Alberta, PcDBP, 20 aa Linear Peptides (PEP20205061690)	8	41	KTACNAYETWINVNKSKWNT	400
University of Alberta, PcDBP, 20 aa Linear Peptides (PEP20205061690)	8	42	TACNAYETWINVNKSKWNTL	414.5
University of Alberta, PcDBP, 20 aa Linear Peptides (PEP20205061690)	8	43	ACNAYETWINVNKSKWNTLL	414
University of Alberta, PcDBP, 20 aa Linear Peptides (PEP20205061690)	8	44	CNAYETWINVNKSKWNTLLK	408.25
University of Alberta, PcDBP, 20 aa Linear Peptides (PEP20205061690)	8	45	NAYETWINVNKSKWNTLLKS	414.5
University of Alberta, PcDBP, 20 aa Linear Peptides (PEP20205061690)	8	46	AYETWINVNKSKWNTLLKSF	400
University of Alberta, PcDBP, 20 aa Linear Peptides (PEP20205061690)	8	47	YETWINVNKSKWNTLLKSFA	400
University of Alberta, PcDBP, 20 aa Linear Peptides (PEP20205061690)	8	48	ETWINVNKSKWNTLLKSFAN	400
University of Alberta, PcDBP, 20 aa Linear Peptides (PEP20205061690)	8	49	TWINVNKSKWNTLLKSFANF	400
University of Alberta, PcDBP, 20 aa Linear Peptides (PEP20205061690)	8	50	WINVNKSKWNTLLKSFANFK	400
University of Alberta, PcDBP, 20 aa Linear Peptides (PEP20205061690)	8	51	INVNKSKWNTLLKSFANFKT	408.75
University of Alberta, PcDBP, 20 aa Linear Peptides (PEP20205061690)	8	52	NVNKSKWNTLLKSFANFKTD	407
University of Alberta, PcDBP, 20 aa Linear Peptides (PEP20205061690)	8	53	VNKSKWNTLLKSFANFKTDY	400
University of Alberta, PcDBP, 20 aa Linear Peptides (PEP20205061690)	8	54	NKSKWNTLLKSFANFKTDYF	400
University of Alberta, PcDBP, 20 aa Linear Peptides (PEP20205061690)	8	55	KSKWNTLLKSFANFKTDYFS	400
University of Alberta, PcDBP, 20 aa Linear Peptides (PEP20205061690)	8	56	SKWNTLLKSFANFKTDYFSE	400
University of Alberta, PcDBP, 20 aa Linear Peptides (PEP20205061690)	8	57	KWNTLLKSFANFKTDYFSEE	400
University of Alberta, PcDBP, 20 aa Linear Peptides (PEP20205061690)	8	58	WNTLLKSFANFKTDYFSEET	400
University of Alberta, PcDBP, 20 aa Linear Peptides (PEP20205061690)	8	59	NTLLKSFANFKTDYFSEETC	400
University of Alberta, PcDBP, 20 aa Linear Peptides (PEP20205061690)	8	60	TLLKSFANFKTDYFSEETCR	400
University of Alberta, PcDBP, 20 aa Linear Peptides (PEP20205061690)	8	61	LLKSFANFKTDYFSEETCRD	400
University of Alberta, PcDBP, 20 aa Linear Peptides (PEP20205061690)	8	62	LKSFANFKTDYFSEETCRDK	400
University of Alberta, PcDBP, 20 aa Linear Peptides (PEP20205061690)	8	63	KSFANFKTDYFSEETCRDKA	400
University of Alberta, PcDBP, 20 aa Linear Peptides (PEP20205061690)	8	64	SFANFKTDYFSEETCRDKAY	400
University of Alberta, PcDBP, 20 aa Linear Peptides (PEP20205061690)	8	65	FANFKTDYFSEETCRDKAYN	400
University of Alberta, PcDBP, 20 aa Linear Peptides (PEP20205061690)	8	66	ANFKTDYFSEETCRDKAYNS	400
University of Alberta, PcDBP, 20 aa Linear Peptides (PEP20205061690)	8	67	NFKTDYFSEETCRDKAYNSL	400
University of Alberta, PcDBP, 20 aa Linear Peptides (PEP20205061690)	10	2	FKTDYFSEETCRDKAYNSLM	400
University of Alberta, PcDBP, 20 aa Linear Peptides (PEP20205061690)	10	3	KTDYFSEETCRDKAYNSLMI	400
University of Alberta, PcDBP, 20 aa Linear Peptides (PEP20205061690)	10	4	TDYFSEETCRDKAYNSLMIE	400
University of Alberta, PcDBP, 20 aa Linear Peptides (PEP20205061690)	10	5	DYFSEETCRDKAYNSLMIEF	400
University of Alberta, PcDBP, 20 aa Linear Peptides (PEP20205061690)	10	6	YFSEETCRDKAYNSLMIEFK	400
University of Alberta, PcDBP, 20 aa Linear Peptides (PEP20205061690)	10	7	FSEETCRDKAYNSLMIEFKE	400
University of Alberta, PcDBP, 20 aa Linear Peptides (PEP20205061690)	10	8	SEETCRDKAYNSLMIEFKEA	400
University of Alberta, PcDBP, 20 aa Linear Peptides (PEP20205061690)	10	9	EETCRDKAYNSLMIEFKEAY	400
University of Alberta, PcDBP, 20 aa Linear Peptides (PEP20205061690)	10	10	ETCRDKAYNSLMIEFKEAYE	400
University of Alberta, PcDBP, 20 aa Linear Peptides (PEP20205061690)	10	11	TCRDKAYNSLMIEFKEAYEV	400
University of Alberta, PcDBP, 20 aa Linear Peptides (PEP20205061690)	10	12	CRDKAYNSLMIEFKEAYEVN	400
University of Alberta, PcDBP, 20 aa Linear Peptides (PEP20205061690)	10	13	RDKAYNSLMIEFKEAYEVNF	400
University of Alberta, PcDBP, 20 aa Linear Peptides (PEP20205061690)	10	14	DKAYNSLMIEFKEAYEVNFE	400
University of Alberta, PcDBP, 20 aa Linear Peptides (PEP20205061690)	10	15	KAYNSLMIEFKEAYEVNFEN	400
University of Alberta, PcDBP, 20 aa Linear Peptides (PEP20205061690)	10	16	AYNSLMIEFKEAYEVNFENV	400
University of Alberta, PcDBP, 20 aa Linear Peptides (PEP20205061690)	10	17	YNSLMIEFKEAYEVNFENVI	400
University of Alberta, PcDBP, 20 aa Linear Peptides (PEP20205061690)	10	18	NSLMIEFKEAYEVNFENVIN	400
University of Alberta, PcDBP, 20 aa Linear Peptides (PEP20205061690)	10	19	SLMIEFKEAYEVNFENVINL	400
University of Alberta, PcDBP, 20 aa Linear Peptides (PEP20205061690)	10	20	LMIEFKEAYEVNFENVINLD	400
University of Alberta, PcDBP, 20 aa Linear Peptides (PEP20205061690)	10	21	MIEFKEAYEVNFENVINLDD	400
University of Alberta, PcDBP, 20 aa Linear Peptides (PEP20205061690)	10	22	IEFKEAYEVNFENVINLDDD	400
University of Alberta, PcDBP, 20 aa Linear Peptides (PEP20205061690)	10	23	EFKEAYEVNFENVINLDDDH	400
University of Alberta, PcDBP, 20 aa Linear Peptides (PEP20205061690)	10	24	FKEAYEVNFENVINLDDDHY	400
University of Alberta, PcDBP, 20 aa Linear Peptides (PEP20205061690)	10	25	KEAYEVNFENVINLDDDHYT	400
University of Alberta, PcDBP, 20 aa Linear Peptides (PEP20205061690)	10	26	EAYEVNFENVINLDDDHYTG	400
University of Alberta, PcDBP, 20 aa Linear Peptides (PEP20205061690)	10	27	AYEVNFENVINLDDDHYTGL	400
University of Alberta, PcDBP, 20 aa Linear Peptides (PEP20205061690)	10	28	YEVNFENVINLDDDHYTGLC	400
University of Alberta, PcDBP, 20 aa Linear Peptides (PEP20205061690)	10	29	EVNFENVINLDDDHYTGLCI	400
University of Alberta, PcDBP, 20 aa Linear Peptides (PEP20205061690)	10	30	VNFENVINLDDDHYTGLCIC	400
University of Alberta, PcDBP, 20 aa Linear Peptides (PEP20205061690)	10	31	NFENVINLDDDHYTGLCICS	400
University of Alberta, PcDBP, 20 aa Linear Peptides (PEP20205061690)	10	32	FENVINLDDDHYTGLCICSS	400
University of Alberta, PcDBP, 20 aa Linear Peptides (PEP20205061690)	10	33	ENVINLDDDHYTGLCICSST	400
University of Alberta, PcDBP, 20 aa Linear Peptides (PEP20205061690)	10	34	NVINLDDDHYTGLCICSSTK	400
University of Alberta, PcDBP, 20 aa Linear Peptides (PEP20205061690)	10	35	VINLDDDHYTGLCICSSTKA	402.5
University of Alberta, PcDBP, 20 aa Linear Peptides (PEP20205061690)	10	36	INLDDDHYTGLCICSSTKAN	400
University of Alberta, PcDBP, 20 aa Linear Peptides (PEP20205061690)	10	37	NLDDDHYTGLCICSSTKANN	400
University of Alberta, PcDBP, 20 aa Linear Peptides (PEP20205061690)	10	38	LDDDHYTGLCICSSTKANNT	400
University of Alberta, PcDBP, 20 aa Linear Peptides (PEP20205061690)	10	39	DDDHYTGLCICSSTKANNTV	400
University of Alberta, PcDBP, 20 aa Linear Peptides (PEP20205061690)	10	40	DDHYTGLCICSSTKANNTVI	400
University of Alberta, PcDBP, 20 aa Linear Peptides (PEP20205061690)	10	41	DHYTGLCICSSTKANNTVIT	400
University of Alberta, PcDBP, 20 aa Linear Peptides (PEP20205061690)	10	42	HYTGLCICSSTKANNTVITN	403
University of Alberta, PcDBP, 20 aa Linear Peptides (PEP20205061690)	10	43	YTGLCICSSTKANNTVITNS	400
University of Alberta, PcDBP, 20 aa Linear Peptides (PEP20205061690)	10	44	TGLCICSSTKANNTVITNSL	400
University of Alberta, PcDBP, 20 aa Linear Peptides (PEP20205061690)	10	45	GLCICSSTKANNTVITNSLN	400
University of Alberta, PcDBP, 20 aa Linear Peptides (PEP20205061690)	10	46	LCICSSTKANNTVITNSLNY	400
University of Alberta, PcDBP, 20 aa Linear Peptides (PEP20205061690)	10	47	CICSSTKANNTVITNSLNYN	400
University of Alberta, PcDBP, 20 aa Linear Peptides (PEP20205061690)	10	48	ICSSTKANNTVITNSLNYNH	412.5
University of Alberta, PcDBP, 20 aa Linear Peptides (PEP20205061690)	10	49	CSSTKANNTVITNSLNYNHA	400
University of Alberta, PcDBP, 20 aa Linear Peptides (PEP20205061690)	10	50	SSTKANNTVITNSLNYNHAI	404
University of Alberta, PcDBP, 20 aa Linear Peptides (PEP20205061690)	10	51	STKANNTVITNSLNYNHAIE	400
University of Alberta, PcDBP, 20 aa Linear Peptides (PEP20205061690)	10	52	TKANNTVITNSLNYNHAIES	400
University of Alberta, PcDBP, 20 aa Linear Peptides (PEP20205061690)	10	53	KANNTVITNSLNYNHAIESG	400
University of Alberta, PcDBP, 20 aa Linear Peptides (PEP20205061690)	10	54	ANNTVITNSLNYNHAIESGS	400
University of Alberta, PcDBP, 20 aa Linear Peptides (PEP20205061690)	10	55	NNTVITNSLNYNHAIESGSG	400
University of Alberta, PcDBP, 20 aa Linear Peptides (PEP20205061690)	10	56	NTVITNSLNYNHAIESGSGS	400
University of Alberta, PcDBP, 20 aa Linear Peptides (PEP20205061690)	10	57	TVITNSLNYNHAIESGSGSG	400
University of Alberta, PcDBP, 20 aa Linear Peptides (PEP20205061690)	10	58	VITNSLNYNHAIESGSGSGS	402
University of Alberta, PcDBP, 20 aa Linear Peptides (PEP20205061690)	10	59	ITNSLNYNHAIESGSGSGSG	400
